# Supplementary material
Source: PubMed Central journal article supplement (PMC7293861)
Supplement: NIHMS1591832-supplement-Supporting_Information.pdf [file NIHMS1591832-supplement-Supporting_Information.pdf]

# Supporting Information

## Enantioselective Tail-to-Head Cyclizations Catalyzed by Dual-Hydrogen-Bond Donors

Dennis A. Kutateladze<sup>‡</sup>, Daniel A. Strassfeld<sup>‡</sup>, and Eric N. Jacobsen

*Department of Chemistry & Chemical Biology, Harvard University, Cambridge, Massachusetts 02138, United States of America*

[jacobsen@chemistry.harvard.edu](mailto:jacobsen@chemistry.harvard.edu)

### Table of Contents

|                                                                                                                               |        |
|-------------------------------------------------------------------------------------------------------------------------------|--------|
| 1. General Information.....                                                                                                   | (S2)   |
| 2. Synthesis and Characterization of Catalysts <b>7a-7d</b> and Intermediates.....                                            | (S2)   |
| 3. Synthesis and Characterization of Substrates <b>1a-1i</b> , <b>1b-d<sub>1</sub></b> , <b>Z-1b</b> , and Intermediates..... | (S6)   |
| 4. Cyclization of Neryl and Geranyl Chlorides with <b>6</b> .....                                                             | (S13)  |
| 5. Optimization of Catalyst Structure and Reaction Conditions for Enantioselective Cyclization Reactions.....                 | (S18)  |
| 5.1 Optimization with <b>1a</b> .....                                                                                         | (S18)  |
| 5.2 Optimization with <b>1b</b> and <b>1d</b> .....                                                                           | (S20)  |
| 6. Catalytic Enantioselective Cyclization Reactions.....                                                                      | (S23)  |
| 6.1 General procedures.....                                                                                                   | (S23)  |
| 6.2 NMR analysis & GC traces of reactions involving substrates <b>1a-1i</b> .....                                             | (S23)  |
| 6.3 Isolation and characterization of compounds <b>2b-5b</b> .....                                                            | (S54)  |
| 6.4 Elimination of <b>3b</b> .....                                                                                            | (S55)  |
| 6.5 Cyclization reaction with <b>Z-1b</b> .....                                                                               | (S55)  |
| 7. Hammett Analysis.....                                                                                                      | (S56)  |
| 8. Kinetic Isotope Effect Studies.....                                                                                        | (S63)  |
| 9. Kinetics Experiments.....                                                                                                  | (S69)  |
| 9.1 General considerations.....                                                                                               | (S69)  |
| 9.2 Derivation of the rate law.....                                                                                           | (S69)  |
| 9.3 Correlation of catalyst arene properties with reaction rate and enantioselectivity.....                                   | (S77)  |
| 10. Isothermal Titration Calorimetry.....                                                                                     | (S79)  |
| 11. <sup>1</sup> H, <sup>13</sup> C, and <sup>19</sup> F NMR spectra.....                                                     | (S82)  |
| 12. Computations.....                                                                                                         | (S120) |
| 13. X-Ray Crystallographic Information.....                                                                                   | (S207) |
| 14. References.....                                                                                                           | (S220) |

## 1. General Information

All reactions were performed in flame dried vials or round bottom flasks unless otherwise noted. The vials and flasks were fitted with rubber septa, and reactions were conducted under an atmosphere of nitrogen. Stainless steel syringes and cannulae were used to transfer air and moisture sensitive liquids. Column chromatography was performed on a Biotage Isolera automated purification system using silica gel 60 (230-400 mesh) from EM Science. Dimethylated silica gel (dimethylsilan derivative) was purchased from EM Science used as received. Commercial chemical reagents were purchased from Sigma Aldrich, Alfa Aesar, Strem, or TCI, and used as received. Anhydrous solvents (benzene, dichloromethane, diethyl ether, N,N-dimethylformamide, tetrahydrofuran, and toluene) were dried by passage through activated alumina columns using a solvent purification system. Proton nuclear magnetic resonance ( $^1\text{H}$  NMR), fluorine nuclear magnetic resonance ( $^{19}\text{F}$  NMR), and carbon nuclear magnetic resonance ( $^{13}\text{C}$  NMR) spectra were recorded on Inova-500 (500 MHz) or Inova-600 (600 MHz) spectrometers. Proton, fluorine, and carbon chemical shifts are reported in parts per million downfield from tetramethylsilane and are referenced to residual proton in the NMR solvent ( $\text{CHCl}_3 = \delta$  7.27;  $\text{CH}_2\text{Cl}_2 = \delta$  5.32;  $\text{CyH} = \delta$  1.44) or the carbon resonances of the NMR solvent ( $\text{CDCl}_3 = \delta$  77.0) respectively. NMR data are represented as follows: chemical shift, multiplicity (br. = broad signal, s = singlet, d = doublet, t = triplet, q = quartet, m = multiplet), coupling constant in Hertz (Hz), integration. Infrared (IR) spectra were collected on a Bruker Optics Tensor 27 FTIR spectrometer from a thin film sample. Optical rotations were measured using a 1.0 mL cell with a 5 cm path length on a Jasco DIP 370 digital polarimeter. Gas chromatography (GC) analysis was performed on an Agilent 7890A series GC system outfitted with a commercially available cyclosil-B 30m column. High-performance liquid chromatography (HPLC) analysis was performed using an Agilent 1200 series quaternary HPLC system with commercially available ChiralPak and ChiralCel columns, or a Waters Prep-C18 SunFire column (for preparative HPLC). High-resolution mass spectrometry was measured at the Small Molecule Mass Spectrometry Facility at Harvard University within the Faculty of Arts and Sciences using an Agilent 6210 TOF LC/MS spectrometer or a Waters Quattro micro GC/MS/MS spectrometer. All curve fitting presented in this report was carried out using Microsoft Excel. NMR spectra were processed with the Mnova (Mestrelab Research). Computations were performed with Gaussian '16, and computed structures were rendered with CYLview or VMD (for NCI plots).

Abbreviations used:

Boc – tert-butylloxycarbonyl, n-BuLi – n-butyllithium, DCM – dichloromethane, DIPEA – N,N-diisopropylethylamine, DIBAL-H – diisobutylaluminium hydride, DMF – N,N-dimethylformamide, e.e. – enantiomeric excess, Et<sub>2</sub>O – diethyl ether, EtOAc – ethyl acetate, HATU – 1-[Bis(dimethylamino)methylene]-1H-1,2,3-triazolo[4,5-b]pyridinium 3-oxide hexafluorophosphate, Hexafluorophosphate Azabenzotriazole Tetramethyl Uronium, IPA – isopropyl alcohol, ITC – isothermal titration calorimetry, LDA – lithium diisopropylamide, Ms – methanesulfonyl, NEt<sub>3</sub> – triethylamine, THF – tetrahydrofuran, TLC – thin layer chromatography, 9BBN – 9-borabicyclo[3.3.1]nonane

## 2. Synthesis and Characterization of Catalysts 7a-7d and Intermediates

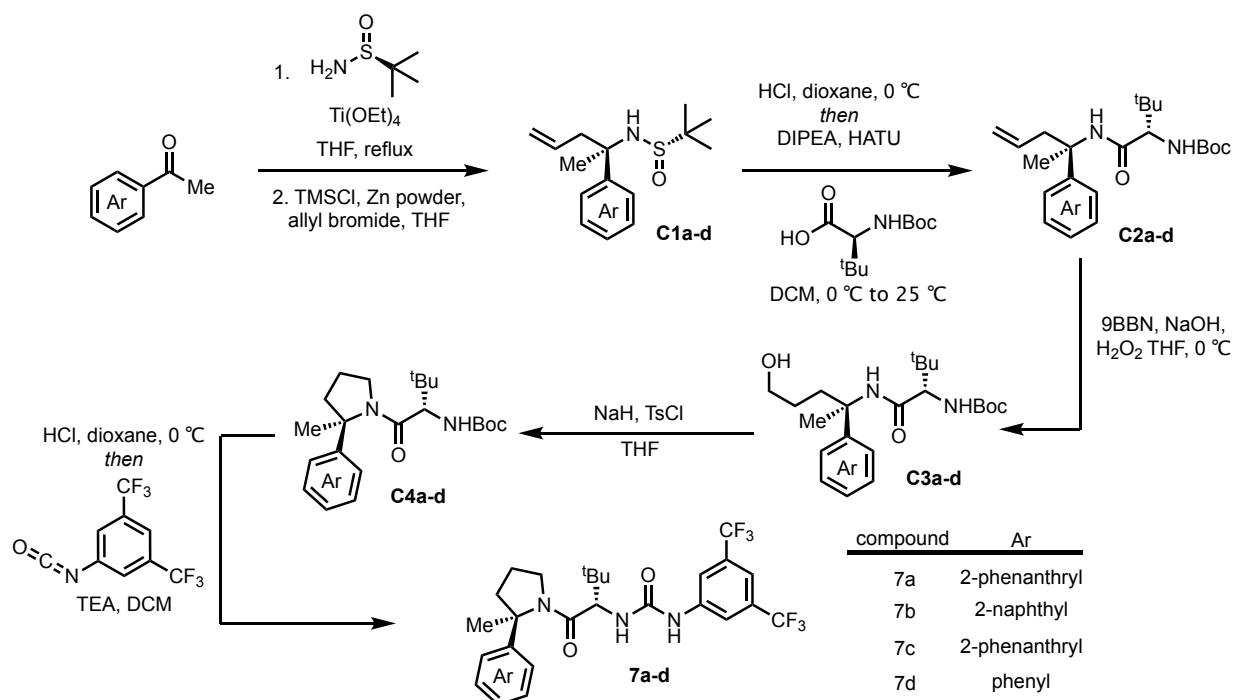

Scheme S1. General synthesis of catalysts 7a-7d. The synthesis of catalyst 7a is described below as an example.

### (S)-2-methyl-N-((R)-2-(phenanthren-2-yl)pent-4-en-2-yl)propane-2-sulfinamide (C1a)

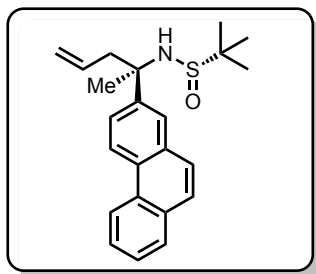

To a flame-dried round bottom flask was added 2-acetylphenanthrene (9.08 mmol, 2.0 g, 1.0 eq.) and anhydrous THF (9 mL). Following additions of titanium ethoxide (19.98 mmol, 4.14 mL, 2.2 eq.) and (S)-Ellman sulfinamide (10.0 mmol, 1.21 g, 1.1 eq.) the mixture was brought to reflux (85 °C) for 12 hours. After this time, the crude reaction was passed through a short silica plug eluting with warm EtOAc (this was critical to ensure the Ellman ketimine was soluble). The eluent was concentrated *in vacuo* and the residue was taken in anhydrous THF (40 mL) and transferred to a flame-dried round bottomed flask. In a separate flame-dried round bottomed flask was added zinc powder (9.98 mmol, 0.65 g, 1.1 eq.) and anhydrous THF (50 mL). Chlorotrimethylsilane (TMSCl) (0.45 mmol, 157  $\mu$ L, 0.05 eq.) was added, followed by allyl bromide (9.98 mmol, 868  $\mu$ L, 1.1 eq.) and the mixture was stirred for 1 hr. before being transferred via cannula to the flask containing the

ketimine in 40 mL of THF. The ensuing reaction was allowed to proceed for 24 hr. after which point it was quenched with sat. aq.  $\text{NH}_4\text{Cl}$  (45 mL) and extracted (3X 40 mL) with EtOAc. The organic layers were combined, washed (2X 40 mL) with brine, filtered over  $\text{MgSO}_4$ , and concentrated *in vacuo*. The resulting residue was purified via flash column chromatography using a gradient of 0 to 40% EtOAc in hexanes (v/v) to provide product **C1a** in 58% yield (1.93 g) as a white solid.

**$^1\text{H NMR}$ :** (500 MHz,  $\text{CDCl}_3$ )  $\delta$  8.68 (dd,  $J = 8.5, 2.8$  Hz, 2H), 7.92 (m, 2H), 7.76 (dd,  $J = 8.9, 2.3$  Hz, 3H), 7.68 (ddd,  $J = 8.4, 7.0, 1.5$  Hz, 1H), 7.62 (ddd,  $J = 8.1, 7.0, 1.2$  Hz, 1H), 5.63 (ddt,  $J = 17.4, 10.1, 7.3$  Hz, 1H), 5.23 (dq,  $J = 17.1, 1.4$  Hz, 1H), 5.16 (dd,  $J = 10.2, 2.1$  Hz, 1H), 3.88 (m, 1H), 2.82 (d,  $J = 7.3$  Hz, 2H), 1.95 (s, 3H), 1.28 (s, 9H)

**$^{13}\text{C NMR}$ :** (126 MHz,  $\text{CDCl}_3$ )  $\delta$  143.5, 133.1, 132.1, 131.7, 130.0, 129.2, 128.6, 127.2, 127.1, 126.7, 126.6, 126.2, 125.3, 122.8, 122.6, 120.5, 60.1, 56.3, 49.3, 27.8, 22.9

**HR-MS:** (ESI) calcd. for  $\text{C}_{23}\text{H}_{27}\text{NOS}$  366.1886 [ $\text{M} + \text{H}^+$ ], found 366.1887

$[\alpha]_D^{22} = +95.2$  (c = 1.0,  $\text{CDCl}_3$ )

### tert-butyl ((S)-3,3-dimethyl-1-oxo-1-(((R)-2-(phenanthren-2-yl)pent-4-en-2-yl)amino)butan-2-yl)carbamate (C2a)

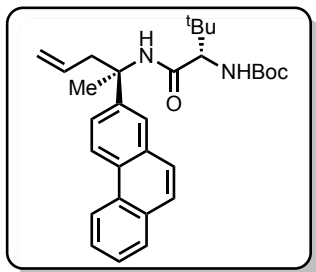

To a flame-dried round bottom flask was added compound **C1a** (5.03 mmol, 1.84 g, 1.0 eq.) and methanol (11.2 mL). The flask was cooled to 0 °C and HCl solution was added (35 mmol, 8.9 mL of a 4 M solution in 1,4 dioxane, 7.0 eq.). The ensuing reaction was allowed to take place for 1 hr. at 0 °C, after which the reaction was seen to be complete by TLC analysis. The solvent was vaporized under reduced pressure, and the resulting residue was taken in DCM (20 mL) and cooled to 0 °C. DIPEA (25.15 mmol, 4.4 mL, 5.0 eq.) was added, followed by HATU (7.55 mmol, 2.87 g, 1.5 eq.) and N-Boc-tert leucine (6.04 mmol, 1.39 g, 1.2 eq.). The reaction was allowed to stir for 24 hours, gradually warming to room temperature before being quenched with sat. aq.  $\text{NH}_4\text{Cl}$  (70 mL) and extracted with EtOAc (3X 70mL). The organic layers were combined, washed with brine (70 mL), filtered over  $\text{MgSO}_4$ , and concentrated *in vacuo*. The resulting residue was purified via flash column

chromatography using a gradient of 0 to 35% Et<sub>2</sub>O in hexanes (v/v) to provide product **C2a** in quantitative yield (2.40 g) as a white solid.

**$^1\text{H NMR}$ :** (500 MHz,  $\text{CDCl}_3$ )  $\delta$  8.63 (dd,  $J = 11.5, 8.5$  Hz, 2H), 7.88 (dd,  $J = 7.9, 1.3$  Hz, 1H), 7.81 (d,  $J = 2.1$  Hz, 1H), 7.64 (m, 5H), 6.13 (s, 1H), 5.65 (ddt,  $J = 17.3, 10.1, 7.3$  Hz, 1H), 5.19 (m, 3H), 3.85 (d,  $J = 9.5$  Hz, 1H), 2.83 (dd,  $J = 13.9, 7.5$  Hz, 1H), 2.64 (dd,  $J = 13.8, 7.2$  Hz, 1H), 1.93 (s, 3H), 1.49 (s, 9H), 1.04 (s, 9H)

**$^{13}\text{C NMR}$ :** (126 MHz,  $\text{CDCl}_3$ )  $\delta$  170.0, 156.1, 143.4, 133.0, 132.0, 131.9, 130.1, 129.0, 128.5, 127.2, 126.9, 126.5, 126.3, 124.8, 124.0, 122.9, 122.6, 119.9, 79.7, 62.8, 58.0, 47.9, 34.4, 28.4, 26.7, 25.1

**HR-MS** (ESI): calcd. for  $\text{C}_{30}\text{H}_{38}\text{N}_2\text{O}_3$  475.2955 [ $\text{M} + \text{H}^+$ ], found 475.2958

$[\alpha]_D^{22} = +28.2$  (c = 1.0,  $\text{CDCl}_3$ )

### tert-butyl ((S)-1-(((R)-5-hydroxy-2-(phenanthren-2-yl)pentan-2-yl)amino)-3,3-dimethyl-1-oxobutan-2-yl)carbamate (C3a)

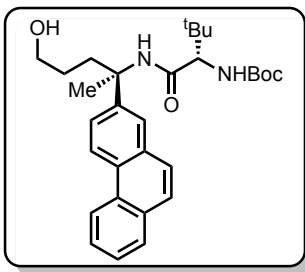

A flame-dried round bottom flask was charged with compound **C2a** (1.21 mmol, 0.576 g, 1.0 eq.) and anhydrous THF (6 mL) before being cooled to 0 °C. A solution of 9BBN (1.27 mmol, 0.4 M in Hexanes, 3.2 mL, 1.05 eq.) was added, and the ensuing hydroboration was allowed to proceed for 3 hr. at this temperature. After this point, aqueous sodium hydroxide (2 M, 6 mL, 10 eq.) was added dropwise to the reaction mixture, followed by dropwise addition of aqueous hydrogen peroxide solution (50 wt. %, 1.2 mL, 17 eq.). After 2 hours, the reaction was allowed to warm to room temperature and was diluted in Et<sub>2</sub>O (50 mL) and brine (30 mL). The organic layer was removed and the aqueous layer was extracted with Et<sub>2</sub>O (2X 50 mL). The organic layers were combined, washed with brine (70 mL), filtered over MgSO<sub>4</sub>, and concentrated *in vacuo*. The resulting residue was purified via flash column chromatography using a gradient of 10 to 75% Et<sub>2</sub>O in hexanes (v/v) to

provide product **C3a** in 56% yield (0.37 g) as a white solid.

**<sup>1</sup>H NMR:** (500 MHz, CDCl<sub>3</sub>) δ 8.63 (dd, *J* = 14.9, 8.5 Hz, 2H), 7.88 (dd, *J* = 7.9, 1.4 Hz, 1H), 7.81 (d, *J* = 2.2 Hz, 1H), 7.71 (m, 2H), 7.64 (m, 2H), 7.59 (m, 1H), 6.78 (s, 1H), 5.20 (d, *J* = 9.6 Hz, 1H), 3.83 (d, *J* = 9.5 Hz, 1H), 3.63 (m, 2H), 2.18 (m, 1H), 2.05 (t, *J* = 11.6 Hz, 1H), 1.93 (d, *J* = 2.1 Hz, 3H), 1.73 (br, 1H), 1.50 (s, 9H), 1.06 (s, 9H)

**<sup>13</sup>C NMR:** (126 MHz, CDCl<sub>3</sub>) δ 170.1, 156.3, 143.5, 132.0, 131.9, 130.1, 128.9, 128.5, 127.3, 126.9, 126.5, 126.3, 124.9, 124.2, 122.8, 122.6, 79.8, 62.8, 62.5, 58.6, 39.9, 34.2, 28.4, 26.8, 26.7, 25.0

**HR-MS** (ESI): calcd. for C<sub>30</sub>H<sub>40</sub>N<sub>2</sub>O<sub>4</sub> 493.3061 [M + H<sup>+</sup>], found 493.3062

[α]<sub>D</sub><sup>22</sup> = +1.2 (c = 1.0, CDCl<sub>3</sub>)

**tert-butyl ((S)-3,3-dimethyl-1-((R)-2-methyl-2-(phenanthren-2-yl)pyrrolidin-1-yl)-1-oxobutan-2-yl)carbamate (C4a)**

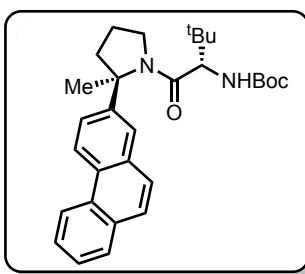

A flame-dried round bottom flask was charged with sodium hydride (60 wt.% in mineral oil, 1.27 mmol, 0.051 g, 4.0 eq.) and THF (1 mL). The flask was cooled to 0 °C before a solution of compound **C3a** (0.32 mmol, 0.15 g, 1.0 eq.) in THF (2 mL) was added dropwise. The reaction was allowed to stir for 30 min. at this temperature before a solution of tosyl chloride (0.38 mmol, 0.072 g, 1.2 eq.) in THF (500 μL) was added. The ensuing reaction was allowed to proceed for 24 hours, gradually warming to room temperature. After this time, the reaction was diluted in Et<sub>2</sub>O (15 mL) and brine (15 mL). The organic layer was separated and the aqueous layer was extracted with Et<sub>2</sub>O (2X 15 mL). The organic layers were combined, washed with brine (10 mL), filtered over MgSO<sub>4</sub>, and concentrated *in vacuo*. The resulting residue was purified via flash column chromatography using a gradient of 0 to 30% Et<sub>2</sub>O in hexanes (v/v) to provide product **C4a** in 94% yield (0.143 g) as a

white solid.

**<sup>1</sup>H NMR:** (500 MHz, CDCl<sub>3</sub>) δ 8.59 (dd, *J* = 23.5, 8.5 Hz, 2H), 7.87 (dd, *J* = 7.8, 1.4 Hz, 1H), 7.70 (m, 3H), 7.61 (m, 2H), 7.49 (m, 1H), 5.20 (d, *J* = 10.0 Hz, 1H), 4.43 (dd, *J* = 10.0, 1.3 Hz, 1H), 4.34 (dt, *J* = 10.1, 6.3 Hz, 1H), 3.91 (dt, *J* = 10.0, 7.5 Hz, 1H), 2.15 (td, *J* = 7.3, 6.9, 2.2 Hz, 2H), 2.05 (d, *J* = 1.1 Hz, 3H), 1.95 (m, 2H), 1.56 (s, 9H), 1.07 (s, 9H)

**<sup>13</sup>C NMR:** (126 MHz, CDCl<sub>3</sub>) δ 170.1, 156.4, 144.6, 131.9, 131.9, 130.2, 128.6, 128.4, 127.3, 126.7, 126.4, 126.1, 124.2, 123.8, 122.7, 122.5, 79.5, 67.3, 58.9, 50.1, 44.6, 34.9, 28.5, 26.5, 25.2, 22.6

**HR-MS** (ESI): calcd. for C<sub>30</sub>H<sub>38</sub>N<sub>2</sub>O<sub>3</sub> 475.2955 [M + H<sup>+</sup>], found 475.2955

[α]<sub>D</sub><sup>22</sup> = +56.4 (c = 1.0, CDCl<sub>3</sub>)

**1-(3,5-bis(trifluoromethyl)phenyl)-3-((S)-3,3-dimethyl-1-((R)-2-methyl-2-(phenanthren-2-yl)pyrrolidin-1-yl)-1-oxobutan-2-yl)urea (7a)**

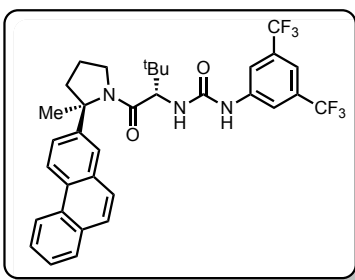

To a flame-dried 20 mL scintillation vial was added compound **C4a** (0.29 mmol, 0.139 g, 1.0 eq) dissolved in 500 μL of DCM. This solution was cooled to 0 °C before HCl solution (4 M in 1,4-dioxane, 1.45 mL, 20 eq.) was added dropwise over the course of 5 min. Following complete addition of HCl, the vial was allowed to stir at 0 °C for 2 hr. after which point Et<sub>2</sub>O (5 mL) was added followed by the careful addition of sat. aq. NaHCO<sub>3</sub> (5 mL). The organic layer was removed and the aqueous layer was extracted with Et<sub>2</sub>O (2X 15 mL). The organic layers were combined, filtered over MgSO<sub>4</sub>, and concentrated *in vacuo*. The resulting residue was dissolved in anhydrous DCM (1 mL) and to this solution was added triethylamine (0.87 mmol, 120 μL, 3.0 eq.) and 3,5-bis(trifluoromethyl)phenyl isocyanate (0.32 mmol, 55 μL, 1.1 eq.). The mixture was



allowed to stir for 12 hrs., after which point the reaction was diluted in DCM (20 mL) and brine (15 mL). The organic layer was separated and the aqueous layer was extracted with DCM (2X 15 mL). The organic layers were combined, washed with brine (10 mL), filtered over MgSO<sub>4</sub>, and concentrated *in vacuo*. The resulting residue was purified via flash column chromatography using a gradient of 0 to 30% Et<sub>2</sub>O in hexanes (v/v) to provide product **7a** in 75% yield (0.137 g) as a white solid.

**<sup>1</sup>H NMR:** (600 MHz, CDCl<sub>3</sub>) δ 8.38 (dd, *J* = 26.6, 8.3 Hz, 2H), 7.77 (d, *J* = 7.7 Hz, 1H), 7.53 (m, 2H), 7.45 (d, *J* = 8.8 Hz, 1H), 7.42 (s, 1H), 7.38 (d, *J* = 8.6 Hz, 2H), 4.73 (d, *J* = 9.7 Hz, 1H), 4.32 (dt, *J* = 10.1, 6.5 Hz, 1H), 3.95 (dt, *J* = 10.0, 7.4 Hz, 1H), 2.15 (t, *J* = 6.8 Hz, 2H), 2.04 (s, 3H), 1.97 (p, *J* = 7.7, 7.2 Hz, 2H), 1.08 (s, 9H)

**<sup>13</sup>C NMR:** (126 MHz, CDCl<sub>3</sub>) δ 170.9, 155.8, 143.5, 140.3, 132.3, 132.0, 131.8, 131.7, 131.5, 129.7, 128.5, 128.4, 126.9, 126.7, 126.5, 126.3, 124.1, 123.4, 122.6, 122.1, 122.0, 119.0, 115.8, 67.7, 58.6, 50.5, 44.4, 35.1, 26.6, 25.0, 22.7

**<sup>19</sup>F NMR:** (471 MHz, CDCl<sub>3</sub>) δ -62.97 (s, 6F)

**HR-MS** (ESI): calcd. for C<sub>34</sub>H<sub>33</sub>F<sub>6</sub>N<sub>3</sub>O<sub>2</sub> 630.2550 [M + H<sup>+</sup>], found 630.2543

[α]<sub>D</sub><sup>22</sup> = +12.6 (c = 1.0, CDCl<sub>3</sub>)

Catalysts **7a-7d** were synthesized as described above for catalyst **7a**:

**1-(3,5-bis(trifluoromethyl)phenyl)-3-((S)-3,3-dimethyl-1-((R)-2-methyl-2-(naphthalen-2-yl)pyrrolidin-1-yl)-1-oxobutan-2-yl)urea (7b)**

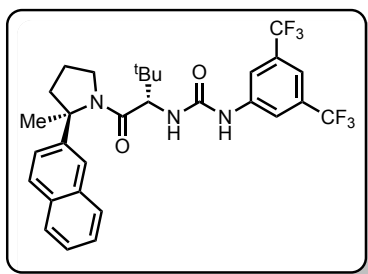

**<sup>1</sup>H NMR:** (500 MHz, CDCl<sub>3</sub>) δ 8.17 (br, 1H), 7.55 (d, *J* = 8.2 Hz, 1H), 7.47 (d, *J* = 8.4 Hz, 4H), 7.40 (m, 2H), 7.29 (m, 1H), 7.22 (t, *J* = 7.5 Hz, 1H), 7.16 (dd, *J* = 8.6, 2.0 Hz, 1H), 4.77 (d, *J* = 9.8 Hz, 1H), 4.31 (ddd, *J* = 10.3, 7.3, 4.9 Hz, 1H), 3.94 (dt, *J* = 10.2, 7.5 Hz, 1H), 2.11 (dd, *J* = 7.8, 5.8 Hz, 2H), 2.00 (s, 3H), 1.92 (m, 2H), 1.10 (s, 9H)

**<sup>13</sup>C NMR:** (126 MHz, CDCl<sub>3</sub>) δ 170.9, 155.8, 142.3, 140.2, 132.8, 132.3, 132.0, 131.8, 131.7, 131.5, 127.8, 127.6, 127.1, 126.4, 125.8, 125.5, 124.2, 123.1, 123.0, 122.0, 119.1, 115.8, 67.8, 58.5, 50.5, 44.2, 35.1, 26.5, 25.1, 22.6

**<sup>19</sup>F NMR:** (471 MHz, CDCl<sub>3</sub>) δ -62.92 (s, 6F)

**HR-MS** (ESI): calcd. for C<sub>30</sub>H<sub>31</sub>F<sub>6</sub>N<sub>3</sub>O<sub>2</sub> 580.2393 [M + H<sup>+</sup>], found 580.2371

[α]<sub>D</sub><sup>22</sup> = +9.4 (c = 1.0, CDCl<sub>3</sub>)

**1-(3,5-bis(trifluoromethyl)phenyl)-3-((S)-3,3-dimethyl-1-((R)-2-methyl-2-(phenanthren-3-yl)pyrrolidin-1-yl)-1-oxobutan-2-yl)urea (7c)**

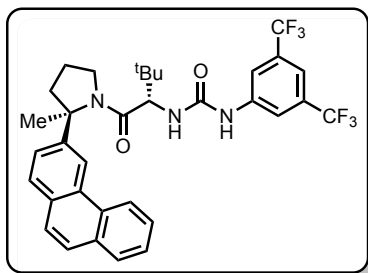

**<sup>1</sup>H NMR:** (500 MHz, CDCl<sub>3</sub>) δ 8.42 (d, *J* = 8.3 Hz, 1H), 8.26 (s, 1H), 7.77 (d, *J* = 7.9 Hz, 1H), 7.56 (p, *J* = 8.3, 7.9 Hz, 2H), 7.43 (m, 3H), 7.36 (s, 1H), 7.29 (m, 3H), 4.85 (d, *J* = 9.6 Hz, 1H), 4.34 (ddd, *J* = 11.4, 7.8, 4.5 Hz, 1H), 3.99 (dt, *J* = 9.9, 7.6 Hz, 1H), 2.19 (t, *J* = 7.3 Hz, 2H), 2.09 (s, 3H), 1.94 (m, 2H), 1.08 (s, 9H)

**<sup>13</sup>C NMR:** (126 MHz, CDCl<sub>3</sub>) δ 170.7, 155.4, 143.0, 140.3, 132.3, 132.0, 131.8, 131.5, 130.1, 129.9, 129.4, 128.5, 128.5, 126.7, 126.3, 126.3, 126.2, 126.0, 124.1, 123.4, 122.1, 122.0, 118.6, 118.0, 115.6, 68.1, 58.3, 50.5, 44.5, 35.6, 26.5, 25.4, 22.6

**<sup>19</sup>F NMR:** (471 MHz, CDCl<sub>3</sub>) δ -62.93 (s, 6F)

**HR-MS** (ESI): calcd. for C<sub>34</sub>H<sub>33</sub>F<sub>6</sub>N<sub>3</sub>O<sub>2</sub> 630.2550 [M + H<sup>+</sup>], found 630.2554

[α]<sub>D</sub><sup>22</sup> = +64.2 (c = 1.0, CDCl<sub>3</sub>)

**1-(3,5-bis(trifluoromethyl)phenyl)-3-((S)-3,3-dimethyl-1-((R)-2-methyl-2-phenylpyrrolidin-1-yl)-1-oxobutan-2-yl)urea (7d)**

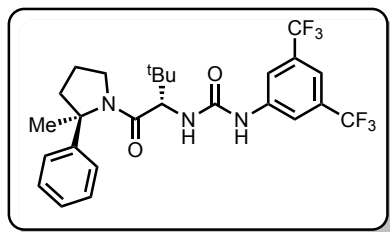

**<sup>1</sup>H NMR:** (500 MHz, CDCl<sub>3</sub>) δ 8.01 (br, 1H), 7.66 (s, 2H), 7.46 (s, 1H), 7.03 (m, 4H), 6.96 (m, 1H), 6.15 (br, 1H), 4.76 (d, *J* = 9.6 Hz, 1H), 4.20 (ddd, *J* = 11.6, 7.6, 4.3 Hz, 1H), 3.90 (dt, *J* = 9.7, 7.6 Hz, 1H), 2.07 (m, 2H), 1.91 (s, 3H), 1.89 (td, *J* = 24.3, 21.8, 10.8 Hz, 2H), 1.10 (s, 9H)

**<sup>13</sup>C NMR:** (126 MHz, CDCl<sub>3</sub>) δ 170.7, 155.4, 145.0, 140.5, 132.3, 132.0, 131.8, 131.5, 127.9, 126.1, 124.5, 124.3, 122.1, 119.5, 115.8, 67.69, 67.67, 58.3, 50.5, 44.5, 35.5, 26.6, 25.1, 22.4

**<sup>19</sup>F NMR:** (500 MHz, CDCl<sub>3</sub>) δ -63.00 (s, 6F)

**HR-MS** (ESI): calcd. for C<sub>26</sub>H<sub>29</sub>F<sub>6</sub>N<sub>3</sub>O<sub>2</sub> 530.2237 [M + H<sup>+</sup>], found 530.2236

[α]<sub>D</sub><sup>22</sup> = +7.8 (c = 1.0, CDCl<sub>3</sub>)

Catalyst **6** was synthesized as described in the literature. Characterization data were found to be in accord with those previously published.<sup>1</sup>

### 3. Synthesis and Characterization of Substrates **1a-1i**, **1b-d<sub>1</sub>**, **Z-1b**, and Intermediates

#### Synthesis and characterization of substrate **1a** (neryl chloride)

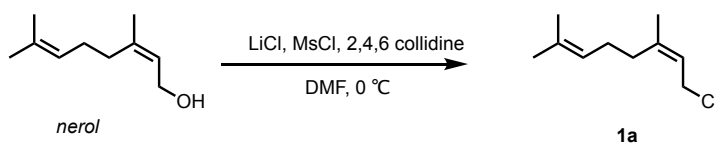

To a flame-dried round bottom flask was added nerol (4.0 mmol, 1.0 eq.), anhydrous lithium chloride (48.0 mmol, 12.0 eq.), and 2,4,6-collidine (6.0 mmol, 1.5 eq.) in anhydrous DMF (27 mL). The reaction vessel was cooled to 0 °C before methanesulfonyl chloride (MsCl) (8.8 mmol, 2.2 eq.) was added slowly to the stirring solution. Following addition of MsCl, the reaction flask was maintained at 0 °C for 60 min. before being diluted in hexanes (100 mL) and transferred to a separatory funnel. The organic layer was washed with sat. aq. ammonium chloride (50 mL), sat. aq. sodium bicarbonate (50 mL), and brine (50 mL). The organic layer was filtered over Na<sub>2</sub>SO<sub>4</sub>, and concentrated *in vacuo*. The resulting residue was purified via flash column chromatography using methylated silica gel eluting with 100% hexanes to afford product **1a** in 66% yield (0.46 g). NMR spectral data were found to be in agreement with literature values.<sup>2</sup>

**<sup>1</sup>H NMR:** (500 MHz, CDCl<sub>3</sub>) δ 5.46 (t, *J* = 8.0 Hz, 1H), 5.12 (m, 1H), 4.09 (d, *J* = 8.0 Hz, 2H), 2.13 (m, 4H), 1.78 (s, 3H), 1.70 (s, 3H), 1.63 (s, 3H)

**<sup>13</sup>C NMR:** (126 MHz, CDCl<sub>3</sub>) δ 142.7, 132.4, 123.5, 121.1, 41.0, 31.9, 26.5, 25.7, 23.5, 17.7

**HR-MS** (EI): calcd. for C<sub>10</sub>H<sub>17</sub>Cl 172.1013 [M<sup>+</sup>•], found 172.1012

Geranyl chloride was purchased from commercial sources and was used as received without further purification.

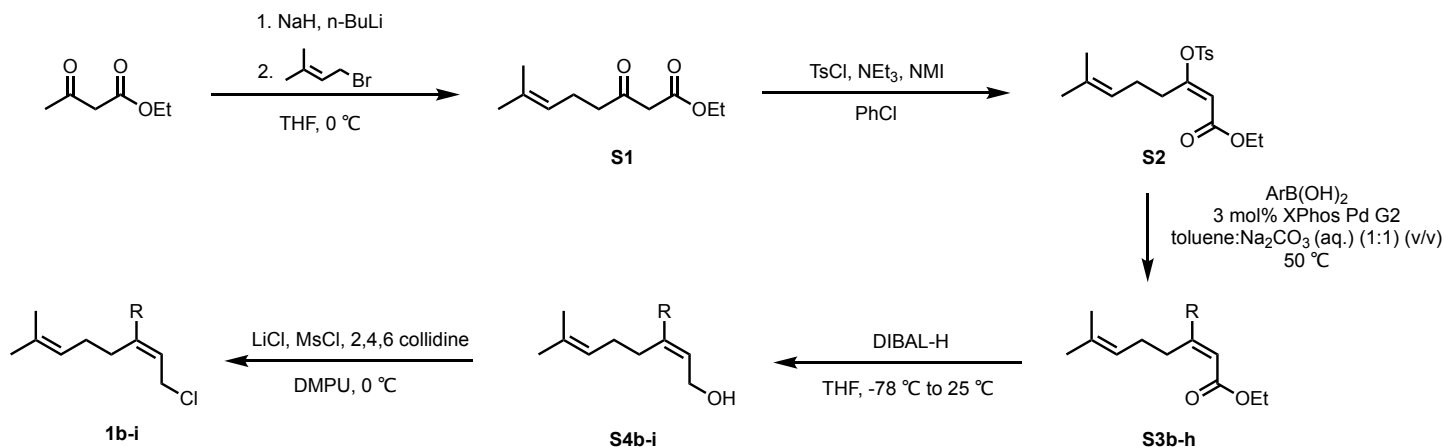

**Scheme S2.** General synthesis of compounds **1b-1i** and **d1-1b**. The synthesis of compound **1b** is used as the example below.

### ethyl 7-methyl-3-oxooct-6-enoate (**S1**)

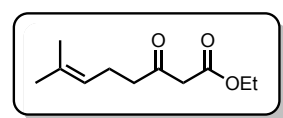

To a flame-dried round bottom flask was added solid NaH (60 wt.% in mineral oil, 27.5 mmol, 1.10 g, 1.1 eq.) and anhydrous THF (25 mL). The flask was cooled to 0 °C before ethyl acetoacetate (25 mmol, 3.18 mL, 1.0 eq.) was added carefully over 5 min (caution: vigorous gas evolution). Following addition of ethyl acetoacetate, the mixture was stirred for 5 min. before n-BuLi solution (2.5 M in hexanes, 26.25 mmol, 10.5 mL, 1.05 eq.) was added dropwise. After 10 minutes, prenyl bromide (27.5 mmol, 3.17 mL, 1.1 eq.) was added and the ensuing reaction was allowed to take place at 0 °C for 30 minutes before being quenched with brine (25 mL) and extracted (3X 40 mL) with diethyl ether. The organic layers were combined, washed with brine (25 mL), filtered over MgSO<sub>4</sub>, and concentrated *in vacuo*. The resulting residue was purified via flash column chromatography using a gradient of 0 to 10% Et<sub>2</sub>O in hexanes (v/v) to provide product **S1** in 53% yield (2.63 g).

**<sup>1</sup>H NMR:** (500 MHz, CDCl<sub>3</sub>) δ (major tautomer) 5.05 (t, *J* = 7.3 Hz, 1H), 4.18 (q, *J* = 7.1 Hz, 2H), 3.42 (s, 2H), 2.55 (t, *J* = 7.4 Hz, 2H), 2.26 (m, 2H), 1.66 (s, 3H), 1.60 (s, 3H), 1.27 (t, *J* = 7.2 Hz, 3H)

**<sup>13</sup>C NMR:** (126 MHz, CDCl<sub>3</sub>) δ (major tautomer) 202.6, 167.2, 133.1, 122.2, 61.3, 49.4, 43.0, 25.6, 22.2, 17.6, 14.1

**IR** (thin film):  $\nu_{\max}$  2977, 2914, 1742, 1715, 1647, 1367, 1235, 1177, 1079 cm<sup>-1</sup>

**HR-MS** (ESI): calcd. for C<sub>11</sub>H<sub>18</sub>O<sub>3</sub> 199.1329 [M + H<sup>+</sup>], found 199.1329

### ethyl (*E*)-7-methyl-3-(tosyloxy)octa-2,6-dienoate (**S2**)

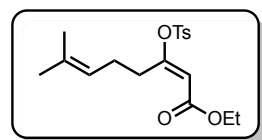

Compound **S2** was synthesized according to a modified literature procedure.<sup>3</sup> To a flame-dried round bottom flask was added compound **S1** (13.27 mmol, 2.63 g, 1.0 eq.), triethylamine (19.9 mmol, 2.75 mL, 1.5 eq.), and N-methyl imidazole (19.9 mmol, 1.58 mL, 1.5 eq.) in 30 mL of chlorobenzene. Tosyl chloride (17.25 mmol, 3.28 g, 1.3 eq.) was added in three portions over 20 min. and following addition of the final portion, the mixture was allowed to stir for 4 hours at room temperature before being quenched with brine (30 mL) and extracted (3X 30 mL) with ethyl acetate. The organic layers were combined, washed (2X 20 mL) with brine, filtered over MgSO<sub>4</sub>, and concentrated *in vacuo*. The resulting residue was purified via flash column chromatography using a gradient of 0 to 60% dichloromethane in hexanes (v/v) to afford product **S2** in 71% yield (3.30 g) as a light-yellow oil. <sup>1</sup>H NMR analysis of the crude reaction mixture revealed product **S2** was formed in an 11:1 E:Z ratio; the minor Z isomer was found to be readily separable by conventional flash chromatography.

**<sup>1</sup>H NMR:** (500 MHz, CDCl<sub>3</sub>) δ 7.83 (d, *J* = 8.2 Hz, 2H), 7.37 (d, *J* = 33.1 Hz, 2H), 5.80 (s, 1H), 5.01 (tdq, *J* = 7.2, 5.8, 1.4 Hz, 1H), 4.15 (q, *J* = 7.1 Hz, 2H), 2.71 (m, 2H), 2.47 (s, 3H), 2.13 (m, 2H), 1.56 (s, 3H), 1.64 (s, 3H), 1.27 (t, *J* = 7.1 Hz, 3H)

**<sup>13</sup>C NMR:** (126 MHz, CDCl<sub>3</sub>) δ 165.4, 165.2, 145.7, 133.2, 133.0, 129.9, 128.2, 122.1, 110.0, 60.4, 31.5, 25.6, 25.1, 21.7, 17.6, 14.1

**IR** (thin film):  $\nu_{\max}$  2979.43, 2926.71, 1719.49, 1649.04, 1370.78, 1179.23, 1157.96 cm<sup>-1</sup>

**HR-MS** (ESI): calcd. for C<sub>18</sub>H<sub>24</sub>O<sub>5</sub>S 353.1417 [M + H<sup>+</sup>], found 353.1419

## General procedure for synthesis of $\beta$ -aryl esters **S3b-h** and **Z-S3b**

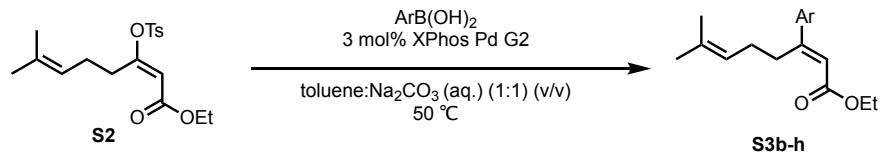

All  $\beta$ -aryl esters (**S3b-h** and **Z-S3b**) were synthesized according to the following procedure. Compound **S3b** (Ar = Ph) is used as the example. To a flame-dried round-bottom flask was added compound **S2** (6.5 mmol, 1.0 eq.) and phenyl boronic acid (7.8 mmol, 1.2 eq.) in anhydrous toluene (19 mL). A saturated aqueous solution of  $\text{Na}_2\text{CO}_3$  sparged with  $\text{N}_2$  was added (19 mL), followed by solid XPhos Pd G2 catalyst (0.2 mmol, 0.03 eq.). The reaction vessel was heated to 50 °C and allowed to stir for 12 hours before being quenched with brine (50 mL) and extracted (3X 50 mL) with ethyl acetate. The organic layers were combined, washed (2X 50 mL) with brine, filtered over  $\text{MgSO}_4$ , and concentrated *in vacuo*. The resulting residue was purified via flash column chromatography using a gradient of 0 to 5%  $\text{Et}_2\text{O}$  in Hexanes (v/v) to afford product **S3b** in 85% yield (1.43 g) as a clear light yellow oil.

### ethyl (*E*)-7-methyl-3-phenylocta-2,6-dienoate (**S3b**)

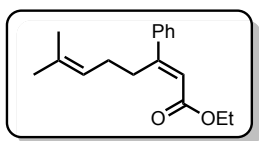

**$^1\text{H NMR}$** : (500 MHz,  $\text{CDCl}_3$ )  $\delta$  7.45 (m, 2H), 7.38 (m, 3H), 6.04 (s, 1H), 5.15 (ddt,  $J = 7.3, 5.8, 3.0, 1.5$  Hz, 1H), 4.23 (q,  $J = 7.2, 2\text{H}$ ), 3.13 (t,  $J = 7.8\text{Hz}$ , 2H), 2.13 (q,  $J = 7.6$  Hz, 2H), 1.66 (s, 3H), 1.53 (s, 3H), 1.33 (t,  $J = 7.1\text{Hz}$ , 3H)

**$^{13}\text{C NMR}$** : (126 MHz,  $\text{CDCl}_3$ )  $\delta$  166.5, 160.0, 141.4, 132.2, 128.8, 128.5, 126.7, 123.6, 117.6, 59.8, 31.1, 27.6, 25.7, 17.6, 14.4

**IR** (thin film):  $\nu_{\text{max}}$  2977.75, 2928.16, 1712.02, 1623.76, 1163.45  $\text{cm}^{-1}$

**HR-MS** (ESI): calcd. for  $\text{C}_{17}\text{H}_{22}\text{O}_2$  259.1693 [ $\text{M} + \text{H}^+$ ], found 259.1695

### ethyl (*E*)-3-cyclohexyl-7-methylocta-2,6-dienoate (**S3i**)

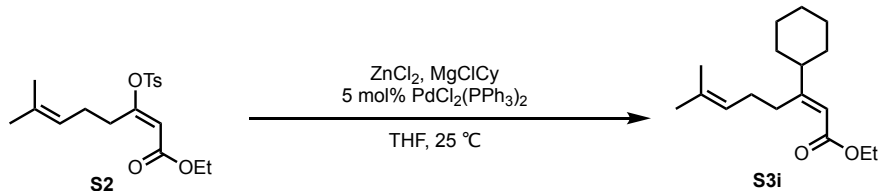

To a flame-dried round bottom flask was added  $\text{ZnCl}_2$  solution (1 M in THF, 10.25 mL, 1.6 eq.) and anhydrous THF (10 mL). A solution of cyclohexyl magnesium chloride (2 M in  $\text{Et}_2\text{O}$ , 4.8 mL, 1.5 eq.) was added slowly over the course of 10 minutes. Following complete addition of the Grignard reagent, the mixture was allowed to stir for 40 minutes, after which point a solution of compound **S2** (9.61 mmol, 1.0 eq.) and  $\text{PdCl}_2(\text{PPH}_3)_2$  (0.32 mmol, 0.05 eq.) in THF (10 mL) was added dropwise. The ensuing reaction was allowed to proceed for 12 hours at room temperature after which it was quenched with brine (50 mL) and diluted in  $\text{Et}_2\text{O}$  (50 mL). The organic layer was separated, and the aqueous layer was extracted (2X 50 mL) with  $\text{Et}_2\text{O}$ . The combined organic layers were dried over  $\text{MgSO}_4$ , and concentrated *in vacuo*. The resulting residue was purified via flash column chromatography using a gradient of 0 to 5%  $\text{Et}_2\text{O}$  in Hexanes (v/v) to afford product **S3i** in 65% yield (1.11 g) as a colorless oil.

**$^1\text{H NMR}$** : (500 MHz,  $\text{CDCl}_3$ )  $\delta$  5.61 (s, 1H), 5.17 (tt,  $J = 7.6, 1.8$  Hz, 1H), 4.14 (q,  $J = 7.1$  Hz, 2H), 2.59 (m, 2H), 2.13 (q,  $J = 7.8$  Hz, 2H), 1.98 (tt,  $J = 11.4, 3.0$  Hz, 1H), 1.80 (m, 4H), 1.69 (s, 3H), 1.62 (s, 3H) 1.28 (m, 5H), 1.17 (m, 4H)

**$^{13}\text{C NMR}$** : (126 MHz,  $\text{CDCl}_3$ )  $\delta$  168.9, 166.9, 131.8, 124.1, 113.8, 59.4, 47.0, 32.2, 32.2, 27.8, 26.6, 26.2, 25.7, 17.7, 14.3

**HR-MS** (EI): calcd. for  $\text{C}_{17}\text{H}_{28}\text{O}_2$  264.2089 [ $\text{M}^+$ ], found 264.2079

## General procedure for synthesis of allylic alcohols **S4b-i** and **Z-S4b**

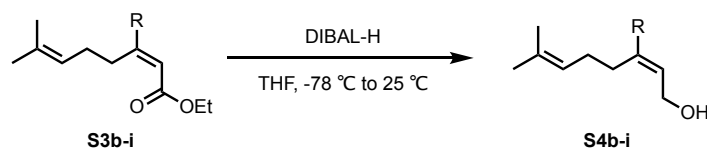

All allylic alcohols (**S4b-i** and **Z-S4b**) were synthesized according to the following procedure. Synthesis of compound **S4b** (R = Ph) is used as the example. To a flame-dried round-bottom flask was added compound **S3b** (5.36 mmol, 1.0 eq.) in anhydrous THF (10 mL). The reaction vessel was cooled to -78 °C before diisobutyl aluminum hydride (DIBAL-H) (16 mmol, 16 mL, 1 M in THF, 3.0 eq.) was added slowly to the stirring solution. Following addition of DIBAL-H, the reaction flask was maintained at -78 °C for 1 hour before warming to 25 °C for an additional hour. The reaction flask was then cooled to 0 °C and slowly quenched with sat. aq. sodium potassium tartrate (10 mL). After one hour of stirring, the reaction was transferred to a separatory funnel and extracted (3X 50 mL) with ethyl acetate. The organic layers were combined, washed (2X 50 mL) with brine, filtered over MgSO<sub>4</sub>, and concentrated *in vacuo*. The resulting residue was purified via flash column chromatography using a gradient of 0 to 40% Et<sub>2</sub>O in hexanes (v/v) to afford product **S4b** in 82% yield (0.95 g).

### (*E*)-7-methyl-3-phenylocta-2,6-dien-1-ol (**S4b**)

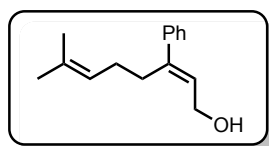

**<sup>1</sup>H NMR:** (600 MHz, CDCl<sub>3</sub>) δ 7.36 (m, 3H), 7.28 (m, 2H), 5.90 (t, *J* = 7.0 Hz, 1H), 5.11 (tdt, *J* = 7.3, 2.7, 1.5 Hz, 1H), 4.31 (dd, *J* = 6.9, 5.6 Hz, 2H), 2.57 (t, *J* = 7.6 Hz, 2H), 2.02 (q, *J* = 7.5 Hz, 2H), 1.68 (1, 3H), 1.51 (s, 3H), 1.45 (t, *J* = 5.7 Hz, 1H)

**<sup>13</sup>C NMR:** (126 MHz, CDCl<sub>3</sub>) δ 142.9, 142.0, 132.6, 128.3, 127.2, 127.1, 126.5, 123.6, 59.6, 30.0, 27.1, 25.6, 17.7

**IR** (thin film):  $\nu_{\max}$  3316.61, 2964.92, 2856.66, 1492.93, 929.60, 697.17 cm<sup>-1</sup>

**HR-MS** (EI): calcd. for C<sub>15</sub>H<sub>20</sub>O 216.1509 [M<sup>+</sup>•], found 216.1511

## General procedure for synthesis of allylic chlorides **1b-1i**, **d1-1b**, and **Z-1b**

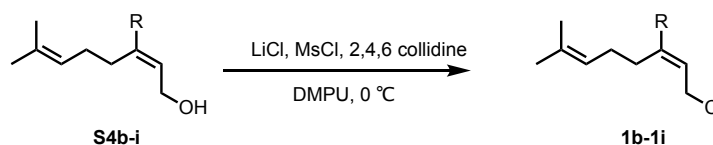

All allylic chlorides **1b-i** and **Z-1b** were synthesized according to the following procedure. Synthesis of compound **1b** (Ar = Ph) is used as the example. To a flame-dried 20 mL scintillation vial was added compound **S4b** (2.12 mmol, 1.0 eq.), anhydrous lithium chloride (25.5 mmol, 12.0 eq.), and 2,4,6-collidine (3.19 mmol, 1.5 eq.) in anhydrous DMPU (5.0 mL). The reaction vessel was cooled to 0 °C before methanesulfonyl chloride (MsCl) (4.67 mmol, 2.2 eq.) was added slowly to the stirring solution. Following addition of MsCl, the reaction flask was maintained at 0 °C for 40 min. before being diluted in hexanes (20 mL) and transferred to a separatory funnel. The organic layer was subsequently washed with sat. aq. ammonium chloride (15 mL), sat. aq. sodium bicarbonate (15 mL), and brine (15 mL) before being filtered over Na<sub>2</sub>SO<sub>4</sub>, and concentrated *in vacuo*. The resulting residue was purified via flash column chromatography using dimethylated silica gel eluting with pure hexanes to afford product **1b** in 52% yield (0.26 g).

### (*E*)-(1-chloro-7-methylocta-2,6-dien-3-yl)benzene (**1b**)

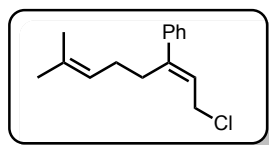

Conducted on 2.12 mmol scale; yield: 52% (0.26 g)

**<sup>1</sup>H NMR:** (500 MHz, CDCl<sub>3</sub>) δ 7.35 (m, 5H), 5.89 (t, *J* = 8.0, 1H), 5.11 (t, *J* = 8.7 Hz, 1H), 4.27 (d, *J* = 8.1 Hz, 2H), 2.60 (m, 2H), 2.06 (q, *J* = 7.6 Hz, 2H), 1.68 (s, 3H), 1.53 (s, 3H)

**<sup>13</sup>C NMR:** (126 MHz, CDCl<sub>3</sub>) δ 145.4, 141.5, 132.6, 128.3, 127.6, 126.6, 123.5, 123.2, 41.1, 30.0, 27.2, 25.7, 17.7

**HR-MS** (EI): calcd. for C<sub>15</sub>H<sub>19</sub>Cl 234.1175 [M<sup>+</sup>•], found 234.1164

**(E)-(1-chloro-7-methylocta-2,6-dien-3-yl-6-d)benzene (1b-d)** – 83% deuterium incorporation

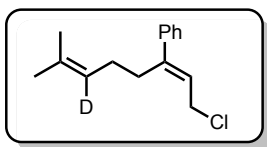

Deuterated substrate **1b-d** was prepared analogously to **1b** following the general procedure for substrate synthesis (S7) with the following modification: deuterated (d1) prenyl bromide (prepared according to a previously reported procedure from Poulter<sup>4</sup>) was used during the alkylation of ethyl acetoacetate.

The deoxychlorination was conducted on 1.31 mmol scale; yield: 67% (0.16 g)

<sup>1</sup>H NMR: (600 MHz, CDCl<sub>3</sub>) δ 7.39 – 7.31 (m, 4H), 7.30 – 7.27 (m, 1H), 5.88 (t, *J* = 8.1 Hz, 1H), 5.11 (ddt, *J* = 7.3, 5.9, 1.5 Hz, 0.17 H – residual protio material), 4.26 (d, *J* = 8.1 Hz, 2H), 2.62 – 2.57 (m, 2H), 2.05 (t, *J* = 7.7 Hz, 2H), 1.67 (s, 3H), 1.51 (s, 3H).

**(E)-4-(1-chloro-7-methylocta-2,6-dien-3-yl)benzonitrile (1c)**

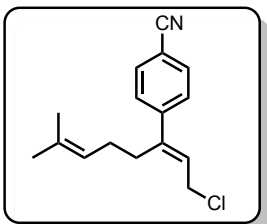

Conducted on 0.70 mmol scale; yield: 39% (0.070 g)

<sup>1</sup>H NMR: (600 MHz, CDCl<sub>3</sub>) δ 7.64 (m, 2H), 7.46 (d, *J* = 8.4 Hz, 2H), 5.94 (td, *J* = 8.0, 1.6 Hz, 1H), 5.06 (tdt, *J* = 7.3, 3.0, 1.5 Hz, 1H), 4.25 (dd, *J* = 8.0, 1.7 Hz, 2H), 2.60 (td, *J* = 7.6, 1.6 Hz, 2H), 2.04 (q, *J* = 7.3 Hz, 2H), 1.66 (s, 3H), 1.50 (s, 3H)

<sup>13</sup>C NMR: (126 MHz, CDCl<sub>3</sub>) δ 146.2, 143.7, 133.1, 132.2, 127.3, 126.2, 122.6, 118.8, 111.2, 40.3, 29.7, 27.0, 25.6, 17.7

HR-MS (EI): calcd. for C<sub>16</sub>H<sub>18</sub>CIN 259.1122 [M<sup>+</sup>], found 259.1125

**(E)-1-(1-chloro-7-methylocta-2,6-dien-3-yl)-4-(trifluoromethyl)benzene (1d)**

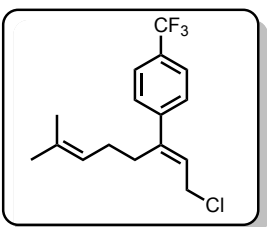

Conducted on 0.95 mmol scale; yield: 33% (0.095 g)

<sup>1</sup>H NMR: (500 MHz, CDCl<sub>3</sub>) δ 7.60 (m, 2H), 7.47 (m, 2H), 5.92 (td, *J* = 8.0, 1.8 Hz, 1H), 5.08 (tdq, *J* = 7.3, 3.0, 1.5 Hz, 1H), 4.26 (dd, *J* = 8.0, 1.9 Hz, 2H), 2.61 (ddd, *J* = 8.1, 6.8, 1.8 Hz, 2H), 2.04 (q, *J* = 7.6 Hz, 2H), 1.67 (s, 3H), 1.51 (s, 3H)

<sup>13</sup>C NMR: (126 MHz, CDCl<sub>3</sub>) δ 145.2, 144.2, 132.9, 129.8, 126.9, 125.4, 125.3, 125.3, 122.8, 40.5, 29.9, 27.0, 25.6, 17.7

<sup>19</sup>F NMR: (500 MHz, CDCl<sub>3</sub>) δ -62.53 (s, 3F)

HR-MS (EI): calcd. for C<sub>16</sub>H<sub>18</sub>ClF<sub>3</sub> 302.1044 [M<sup>+</sup>], found 302.1042

**(E)-1-chloro-4-(1-chloro-7-methylocta-2,6-dien-3-yl)benzene (1e)**

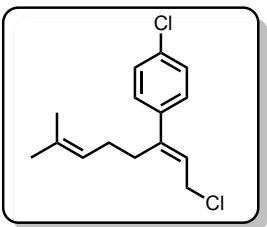

Conducted on 0.70 mmol scale; yield: 46% (0.088 g)

<sup>1</sup>H NMR: (600 MHz, CDCl<sub>3</sub>) δ 7.27 (m, 4H), 5.83 (t, *J* = 8.0 Hz, 1H), 5.05 (ddq, *J* = 8.8, 5.8, 1.4 Hz, 1H), 4.21 (dd, *J* = 8.0, 1.1 Hz, 2H), 2.54 (t, *J* = 7.7 Hz, 2H), 2.00 (q, *J* = 7.5 Hz, 2H), 1.64 (d, *J* = 1.3 Hz, 3H), 1.48 (s, 3H).

<sup>13</sup>C NMR: (126 MHz, CDCl<sub>3</sub>) δ 144.3, 139.9, 133.5, 132.8, 128.5, 127.9, 124.0, 123.0, 40.8, 30.0, 27.0, 25.7, 17.7

HR-MS (EI): calcd. for C<sub>15</sub>H<sub>18</sub>Cl<sub>2</sub> 268.0780 [M<sup>+</sup>], found 268.0777

**(E)-1-(1-chloro-7-methylocta-2,6-dien-3-yl)-4-methylbenzene (1f)**

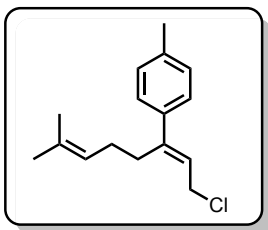

Conducted on 0.40 mmol scale; yield: 54% (0.054 g)

**<sup>1</sup>H NMR:** (500 MHz, CDCl<sub>3</sub>) δ 7.28 (m, 2H), 7.15 (m, 2H), 5.87 (td, *J* = 8.1, 1.7 Hz, 1H), 5.12 (ddq, *J* = 8.9, 5.9, 1.6 Hz, 1H), 4.26 (m, 2H), 2.58 (ddd, *J* = 8.0, 6.8, 1.7 Hz, 2H), 2.36 (s, 3H), 2.06 (m, 2H), 1.68 (s, 3H), 1.54 (s, 3H).

**<sup>13</sup>C NMR:** (126 MHz, CDCl<sub>3</sub>) δ 145.3, 138.5, 137.4, 132.5, 129.0, 126.4, 123.3, 122.7, 41.2, 30.0, 27.2, 25.7, 21.1, 17.7

**HR-MS** (EI): calcd. for C<sub>16</sub>H<sub>21</sub>Cl 248.1326 [M<sup>+</sup>•], found 248.1323

#### (*E*)-1-(1-chloro-7-methylocta-2,6-dien-3-yl)-3-methylbenzene (1g)

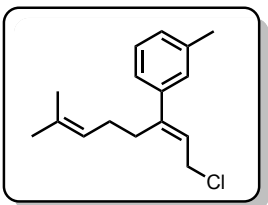

Conducted on 0.70 mmol scale; yield: 54% (0.094 g)

**<sup>1</sup>H NMR:** (500 MHz, CDCl<sub>3</sub>) δ 7.23 (t, *J* = 7.5 Hz, 1H), 7.18 (m, 2H), 7.11 (dd, *J* = 7.4, 1.8 Hz, 1H), 5.87 (t, *J* = 8.0 Hz, 1H), 5.13 (tp, *J* = 7.2, 1.4 Hz, 1H), 4.27 (d, *J* = 8.1 Hz, 2H), 2.59 (dd, *J* = 8.7, 6.8 Hz, 2H), 2.37 (s, 3H), 2.06 (q, *J* = 7.6 Hz, 2H), 1.69 (s, 3H), 1.54 (s, 3H)

**<sup>13</sup>C NMR:** (126 MHz, CDCl<sub>3</sub>) δ 145.6, 141.5, 137.9, 132.5, 128.4, 128.2, 127.4, 123.7, 123.3, 123.3, 41.1, 30.1, 27.2, 25.7, 21.5, 17.7

**HR-MS** (EI): calcd. for C<sub>16</sub>H<sub>21</sub>Cl 248.1326 [M<sup>+</sup>•], found 248.1327

#### (*E*)-1-(1-chloro-7-methylocta-2,6-dien-3-yl)-3-(trifluoromethyl)benzene (1h)

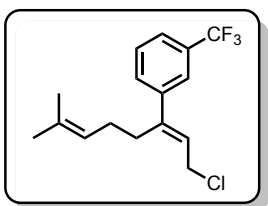

Conducted on 0.70 mmol scale; yield: 56% (0.12 g)

**<sup>1</sup>H NMR:** (600 MHz, CDCl<sub>3</sub>) δ 7.60 (d, *J* = 1.8 Hz, 1H), 7.55 (m, 2H), 7.47 (t, *J* = 7.8 Hz, 1H), 5.92 (t, *J* = 8.0 Hz, 1H), 5.09 (tp, *J* = 7.4, 1.5 Hz, 1H), 4.26 (d, *J* = 8.0 Hz, 2H), 2.62 (m, 2H), 2.06 (q, *J* = 7.5 Hz, 2H), 1.67 (s, 3H), 1.51 (s, 3H)

**<sup>13</sup>C NMR:** (126 MHz, CDCl<sub>3</sub>) δ 144.2, 142.4, 132.9, 130.9, 129.9, 128.8, 125.2, 125.1, 124.3, 123.4, 122.8, 40.5, 29.9, 27.0, 25.6, 17.6

**<sup>19</sup>F NMR:** (500 MHz, CDCl<sub>3</sub>) δ -62.64 (s, 3F)

**HR-MS** (EI): calcd. for C<sub>16</sub>H<sub>18</sub>ClF<sub>3</sub> 302.1044 [M<sup>+</sup>•], found 302.1047

#### (*E*)-1-(1-chloro-7-methylocta-2,6-dien-3-yl)cyclohexane (1i)

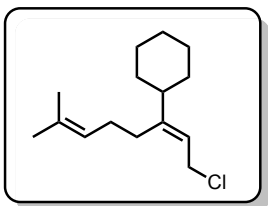

Conducted on 0.70 mmol scale; yield: 30% (0.050 g)

**<sup>1</sup>H NMR:** (500 MHz, CDCl<sub>3</sub>) δ 5.40 (t, *J* = 8.0 Hz, 1H), 5.12 (m, 1H), 4.12 (d, *J* = 8.1, 2H), 2.10 (m, 4H), 1.89 (m, 1H), 1.76 (m, 5H), 1.70 (s, 3H), 1.62 (s, 3H), 1.27 (m, 2H), 1.17 (m, 3H)

**<sup>13</sup>C NMR:** (126 MHz, CDCl<sub>3</sub>) δ 151.4, 132.1, 123.8, 119.1, 45.0, 41.4, 32.4, 30.1, 28.0, 26.8, 26.3, 25.7, 17.7

**HR-MS** (EI): calcd. for C<sub>15</sub>H<sub>25</sub>Cl 240.1639 [M<sup>+</sup>•], found 240.1638

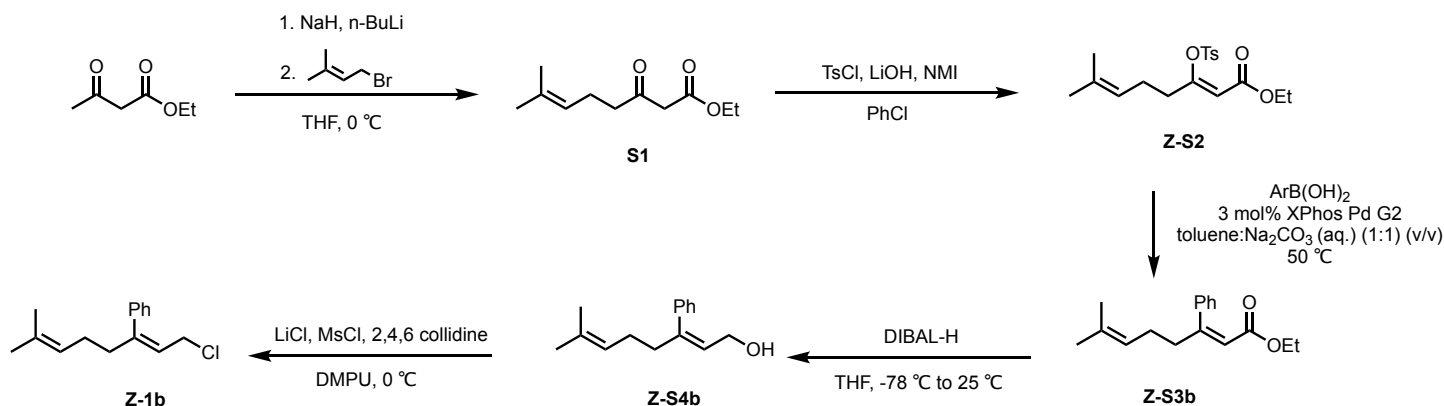

**Scheme S3.** Synthesis of compound **Z-1b**

### ethyl (Z)-7-methyl-3-(tosyloxy)octa-2,6-dienoate (**Z-S2**)

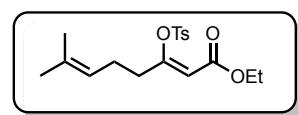

**Z-S2** was synthesized according to a modified literature procedure.<sup>3</sup> To a flame-dried round bottom flask was added compound **S1** (8.73 mmol, 1.73 g, 1.0 eq.), lithium hydroxide (13.09 mmol, 0.313 g, 1.5 eq.), and N-methyl imidazole (13.09 mmol, 1.04 mL, 1.5 eq.) in 20 mL of chlorobenzene. The reaction flask was cooled to 0 °C before tosyl chloride (13.09 mmol, 2.50 g, 1.5 eq.) was added in three portions over 20 minutes. Following addition of the final portion, the mixture was allowed to stir for 24 hours warming to room temperature. After this time, full consumption of the **S1** was observed by TLC and the reaction was quenched with brine (30 mL) and extracted (3X 30 mL) with ethyl acetate. The organic layers were combined, washed (2X 20 mL) with brine, filtered over MgSO<sub>4</sub>, and concentrated *in vacuo*. The resulting residue was purified via flash column chromatography using a gradient of 0 to 60% dichloromethane in hexanes (v/v) to afford product **Z-S2** in 51% yield (1.57 g) as a light-yellow oil.

**<sup>1</sup>H NMR:** (500 MHz, CDCl<sub>3</sub>) δ 7.91 (d, *J* = 8.2 Hz, 2H), 7.36 (d, *J* = 8.0 Hz, 2H), 5.53 (s, 1H), 5.00 (tq, *J* = 7.1, 1.4 Hz, 1H), 4.07 (q, *J* = 7.2, 2H), 2.46 (s, 3H), 2.37 (t, *J* = 7.6 Hz, 2H), 2.18 (q, *J* = 7.5 Hz, 2H), 1.67 (s, 3H), 1.56 (s, 3H), 1.22 (t, *J* = 7.1, 3H)

**<sup>13</sup>C NMR:** (126 MHz, CDCl<sub>3</sub>) δ 163.0, 159.4, 145.3, 133.6, 133.6, 129.6, 128.3, 121.6, 110.6, 60.4, 35.2, 25.6, 24.9, 21.7, 17.7, 14.0

**HR-MS** (ESI): calcd. for C<sub>18</sub>H<sub>24</sub>O<sub>5</sub>S 353.1417 [M + H<sup>+</sup>], found 353.1416

The general procedures for synthesis of **1b-1i** were used to synthesize **Z-1b** from **Z-S2**

### ethyl (Z)-7-methyl-3-phenylocta-2,6-dienoate (**Z-S3b**)

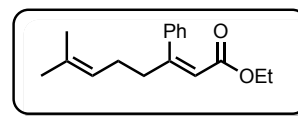

Conducted on 4.45 mmol scale; yield: 91% (1.05 g)

**<sup>1</sup>H NMR:** (500 MHz, CDCl<sub>3</sub>) δ 7.34 (m, 3H), 7.17 (dd, *J* = 6.9, 1.5 Hz, 2H), 5.90 (s, 1H), 5.08 (ddt, *J* = 8.5, 6.9, 1.5 Hz, 1H), 4.00 (q, *J* = 7.1 Hz, 2H), 2.48 (dd, *J* = 8.9, 7.0 Hz, 2H), 2.09 (q, *J* = 7.5 Hz, 2H), 1.68 (s, 3H), 1.54 (s, 3H), 1.08 (t, *J* = 7.1 Hz, 3H)

**<sup>13</sup>C NMR:** (126 MHz, CDCl<sub>3</sub>) δ 166.0, 159.2, 140.1, 132.6, 127.8, 127.5, 127.1, 122.8, 117.4, 59.7, 40.4, 25.9, 25.6, 17.7, 13.9

**HR-MS** (ESI): calcd. for C<sub>17</sub>H<sub>22</sub>O<sub>2</sub> 259.1693 [M + H<sup>+</sup>], found 259.1693

### (Z)-7-methyl-3-phenylocta-2,6-dien-1-ol (**Z-S4b**)

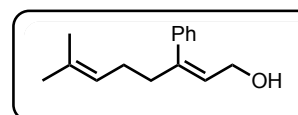

Conducted on 4.07 mmol scale; yield: 93% (0.82 g)

**<sup>1</sup>H NMR:** (500 MHz, CDCl<sub>3</sub>) δ 7.35 (td, *J* = 7.8, 7.3, 1.6 Hz, 2H), 7.28 (m, 1H), 7.14 (dt, *J* = 6.5, 1.5 Hz, 2H), 5.71 (t, *J* = 6.9 Hz, 1H), 5.10 (ddt, *J* = 7.0, 5.5, 1.5 Hz, 1H), 4.06 (d, *J* = 6.9 Hz, 2H), 2.42 (m, 2H), 2.04 (q, *J* = 7.5 Hz, 2H), 1.68 (s, 3H), 1.54 (s, 3H)

**<sup>13</sup>C NMR:** (126 MHz, CDCl<sub>3</sub>) δ 144.5, 140.0, 131.9, 128.1, 128.1, 127.0, 125.6, 123.6, 60.3, 39.0, 26.6, 25.7, 17.7



HR-MS (ESI): calcd. for C<sub>15</sub>H<sub>20</sub>O 217.1542 [M + H<sup>+</sup>], found 217.1544

**(Z)-(1-chloro-7-methylocta-2,6-dien-3-yl)benzene (Z-1b)**

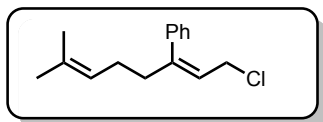

Conducted on 0.92 mmol scale; yield: 69% (0.150 g); synthesized as a 30:1 mixture of Z:E.

<sup>1</sup>H NMR: (500 MHz, CDCl<sub>3</sub>) δ 7.38 (dd, *J* = 8.3, 7.1 Hz, 2H), 7.31 (m, 1H), 7.20 (dd, *J* = 8.0, 1.6 Hz, 2H), 5.71 (td, *J* = 8.0, 1.4 Hz, 1H), 5.08 (tq, *J* = 6.9, 1.5 Hz, 1H), 3.98 (d, *J* = 8.0 Hz, 2H), 2.42 (t, *J* = 7.7 Hz, 2H), 2.03 (q, *J* = 7.6 Hz, 2H), 1.68 (s, 3H), 1.53 (s, 3H)

<sup>13</sup>C NMR: (126 MHz, CDCl<sub>3</sub>) δ 146.67, 139.16, 132.10, 128.28, 128.03, 127.37, 123.36, 122.40, 42.36, 38.97, 26.34, 25.65, 17.71

HR-MS (EI): calcd. for C<sub>15</sub>H<sub>19</sub>Cl 234.1170 [M<sup>+</sup>•], found 234.1173

#### 4. Cyclization of Neryl and Geranyl Chlorides with **6**

Geranyl chloride was purchased from Sigma Aldrich and used as received; neryl chloride (**1a**) was synthesized as described in section 3. Experiments were carried out using 0.2 mmol of either geranyl or neryl chloride, a 10 mol% (0.02 mmol) loading of bis-aryl urea hydrogen bond donor catalyst **6**, 1.5 eq. of sodium bicarbonate (0.3 mmol), and 2.0 mL of CDCl<sub>3</sub> (0.1 M) at room temperature for 24 hours. A stock solution (1.0 mL) of geranyl chloride or **1a** in CDCl<sub>3</sub> was added to a stirring 1.0 mL solution of **6**, sodium bicarbonate, and mesitylene internal standard (10 μL) in CDCl<sub>3</sub> to initiate reactions. Reactions were carried out in sealed oven-dried screw-cap vials under air. After 24 hours, 700 μL aliquots of each reaction were analyzed by <sup>1</sup>H NMR. Product distributions and conversions were assessed from crude <sup>1</sup>H NMR reaction mixtures against mesitylene internal standard. The identities of the products in these experiments were determined by comparing crude <sup>1</sup>H NMR spectra of the catalyzed reactions with <sup>1</sup>H NMR spectra of authentic samples of limonene, α-terpinene, terpinolene, myrcene, and terpinyl chloride (synthesized according to a literature procedure<sup>5</sup>). Note: urea catalyst **6** is only partially soluble in deuteriochloroform at these concentrations. Note: the commercial geranyl chloride used in this study contained a small (< 2%) impurity of linalool chloride and synthesized **1a** contained small impurities of linalool chloride (< 2%) and linalool (< 2%).

crude reaction of 1a, (CDCl<sub>3</sub>, 600 MHz)

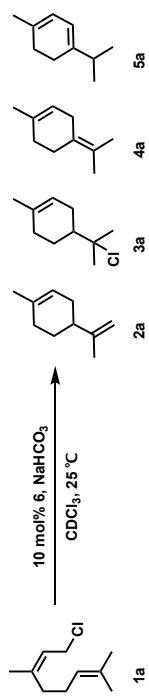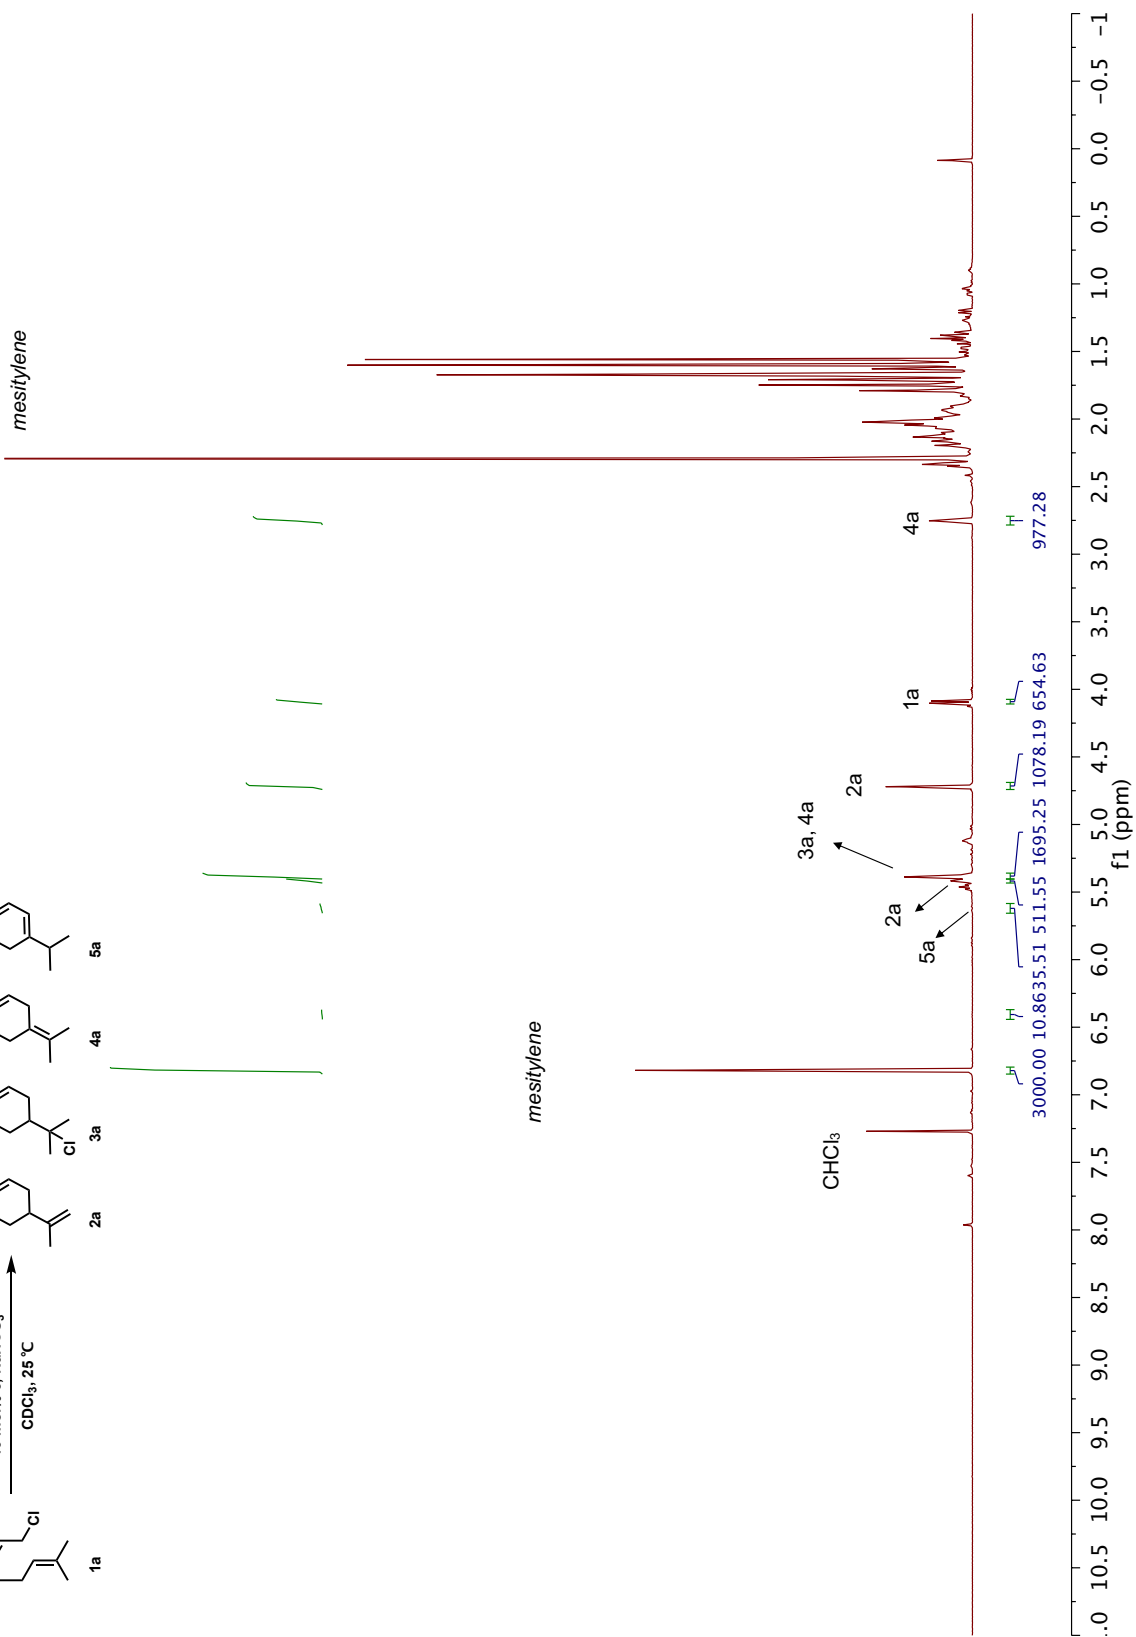

crude reaction of 1a, (CDCl<sub>3</sub>, 600 MHz)

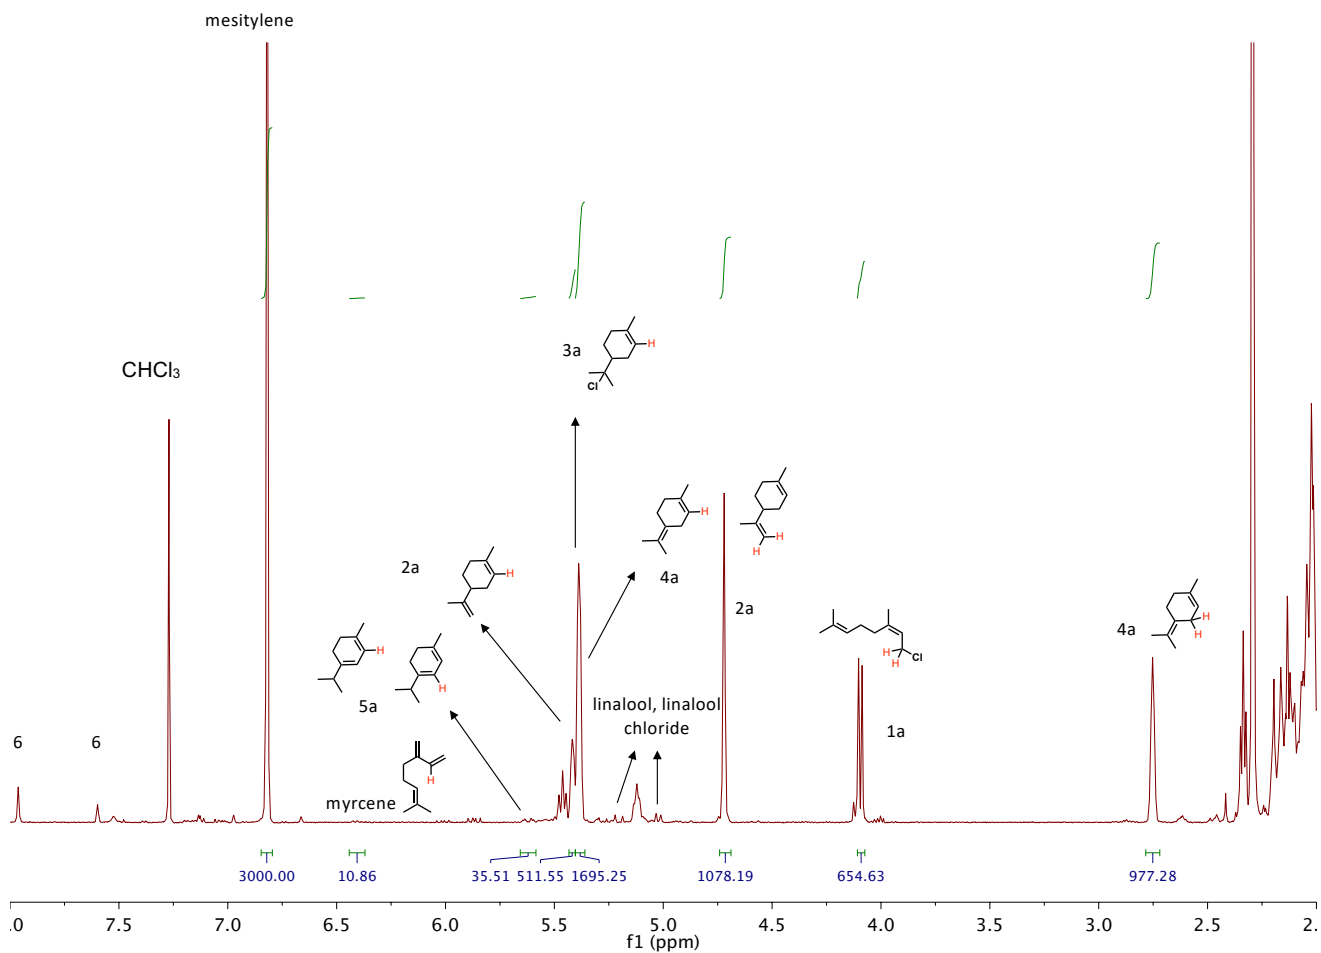

| Mesitylene (M) | 2a (M)      | 3a (M)     | 4a (M)     | 5a (M)     | Myrcene (M) | 1a (M)     | PDT (M)    |
|----------------|-------------|------------|------------|------------|-------------|------------|------------|
| 0.035764269    | 0.019276941 | 0.04314959 | 0.01747085 | 0.00064376 | 0.000393407 | 0.01194527 | 0.08093454 |
| Sample         | 2a (%)      | 3a (%)     | 4a (%)     | 5a (%)     | Myrcene (%) | Conv. (%)  | Yield (%)  |
| 1a             | 19.28       | 43.15      | 17.47      | 0.64       | 0.39        | 88.05      | 80.93      |

crude reaction of geranyl chloride, ( $\text{CDCl}_3$ , 600 MHz)

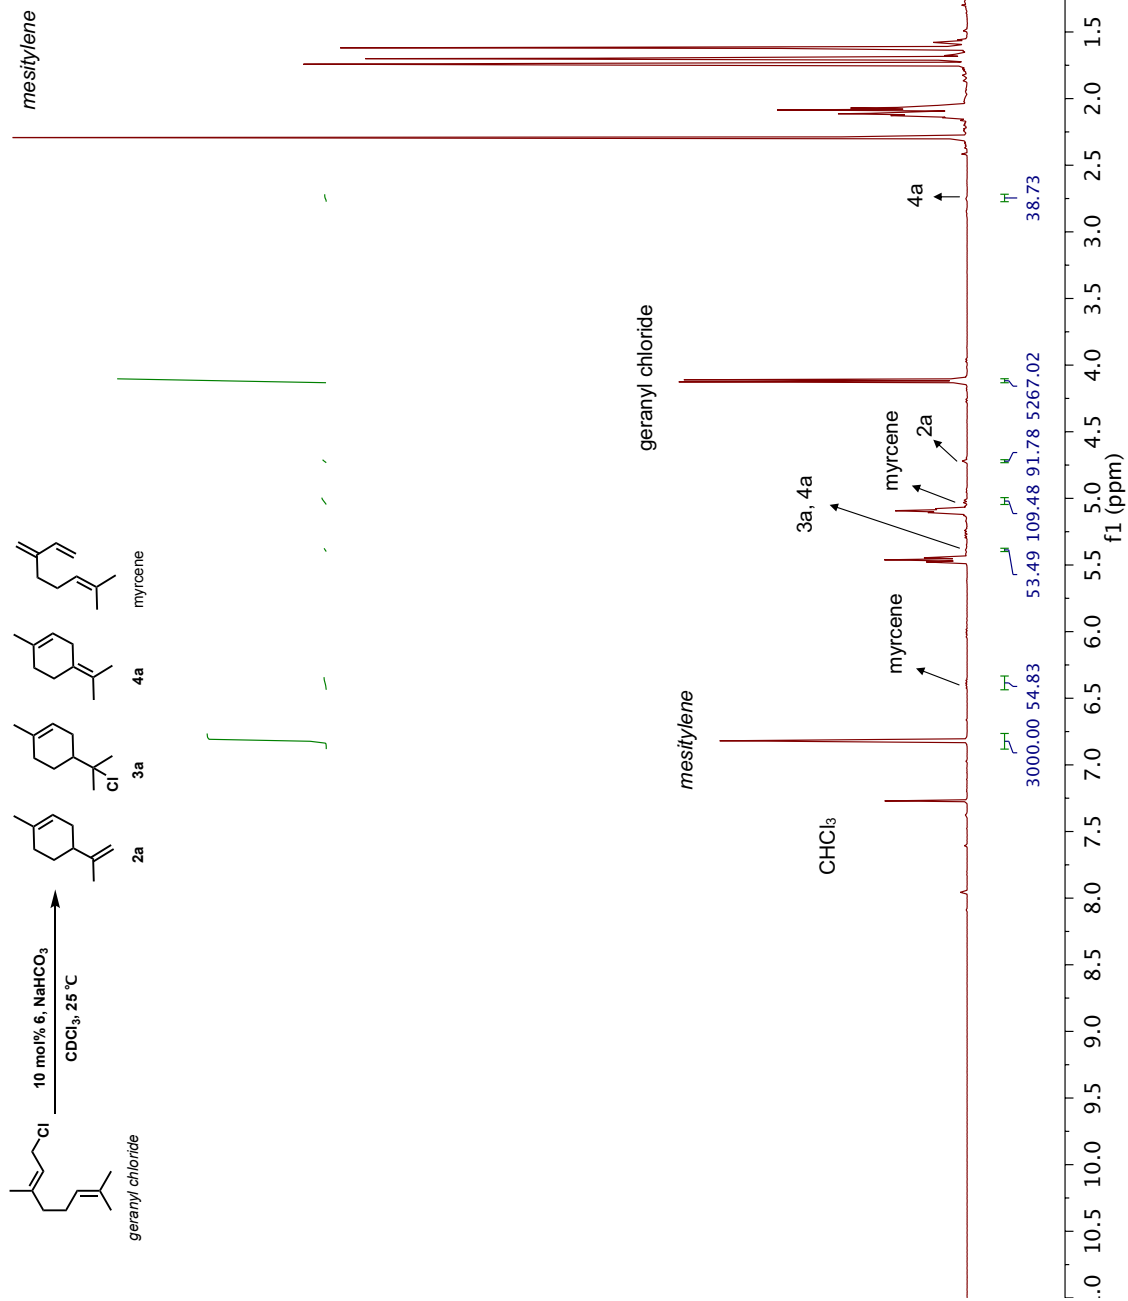

crude reaction of geranyl chloride, ( $\text{CDCl}_3$ , 600 MHz)

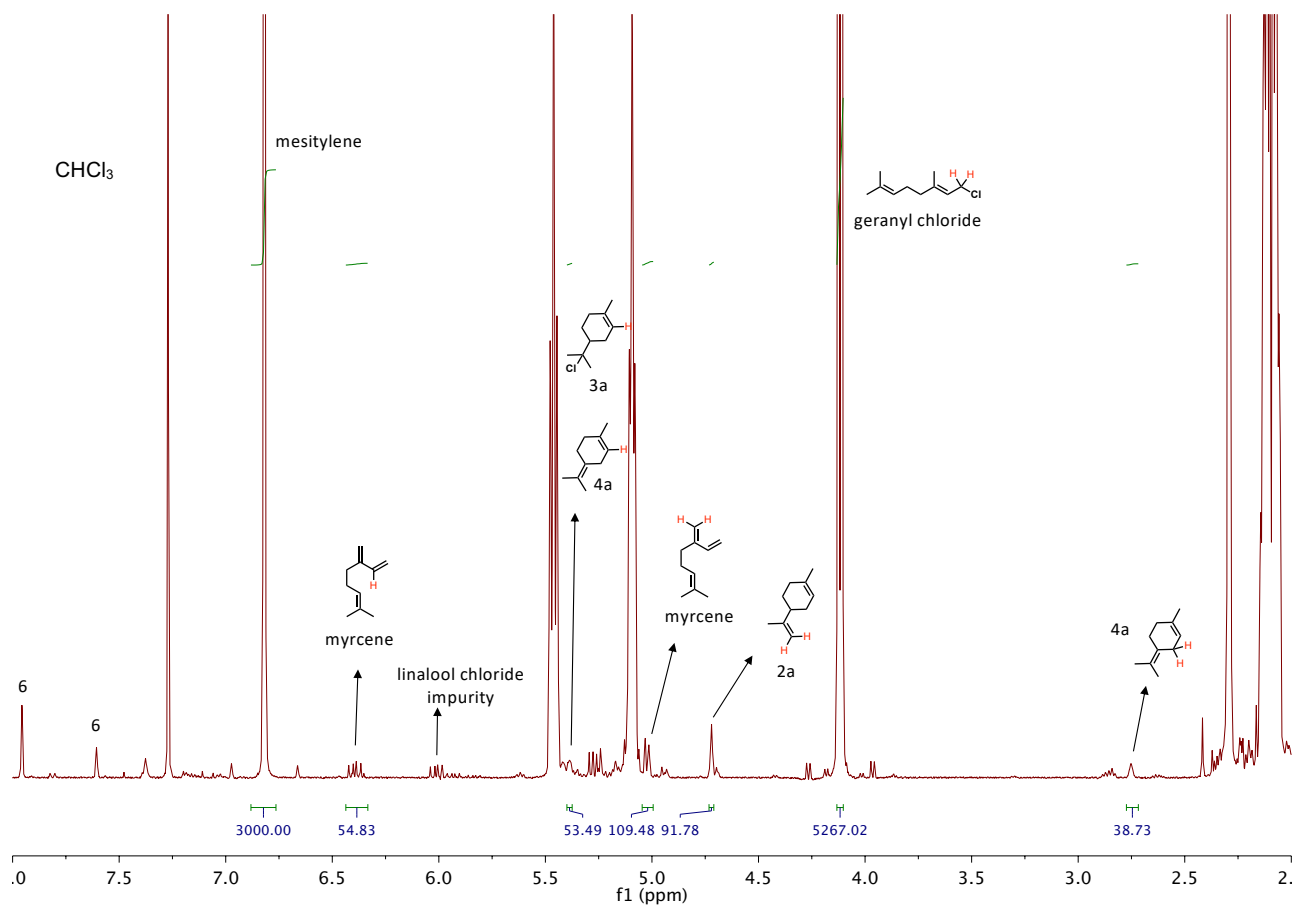

| Mesitylene (M) | 2a (M)      | 3a (M)     | 4a (M)     | 5a (M) | Myrcene (M) | G-Cl (M)   | PDT (M)     |
|----------------|-------------|------------|------------|--------|-------------|------------|-------------|
| 0.035764269    | 0.001627274 | 0.00121599 | 0.00067952 | 0      | 0.001967035 | 0.09416732 | 0.005489815 |
| Sample         | 2a (%)      | 3a (%)     | 4a (%)     | 5a (%) | Myrcene (%) | Conv. (%)  | Yield (%)   |
| Geranyl Cl     | 1.63        | 1.22       | 0.68       | 0.00   | 1.97        | 5.83       | 5.49        |

## 5. Optimization of Catalyst Structure and Reaction Conditions for Enantioselective Cyclization Reactions

### 5.1 Optimization with 1a

**General procedure for reaction optimization with 1a:** To an oven-dried 0.5-dram vial equipped with a magnetic stir-bar was added NaHCO<sub>3</sub> (6.3 mg, 0.075 mmol, 1.5 eq.) and catalyst (0.005 mmol, 0.1 eq.). Then the indicated solvent (0.5 mL, 0.1 M) was added followed by **1a** (8.6 mg, 0.05 mmol, 1 eq.). The reaction vial was capped and was stirred vigorously at room temperature. After 24 hours, the reaction was diluted with 5 mL of hexanes, filtered through a plug of cotton and subjected to chiral GC analysis to determine enantiomeric excess.

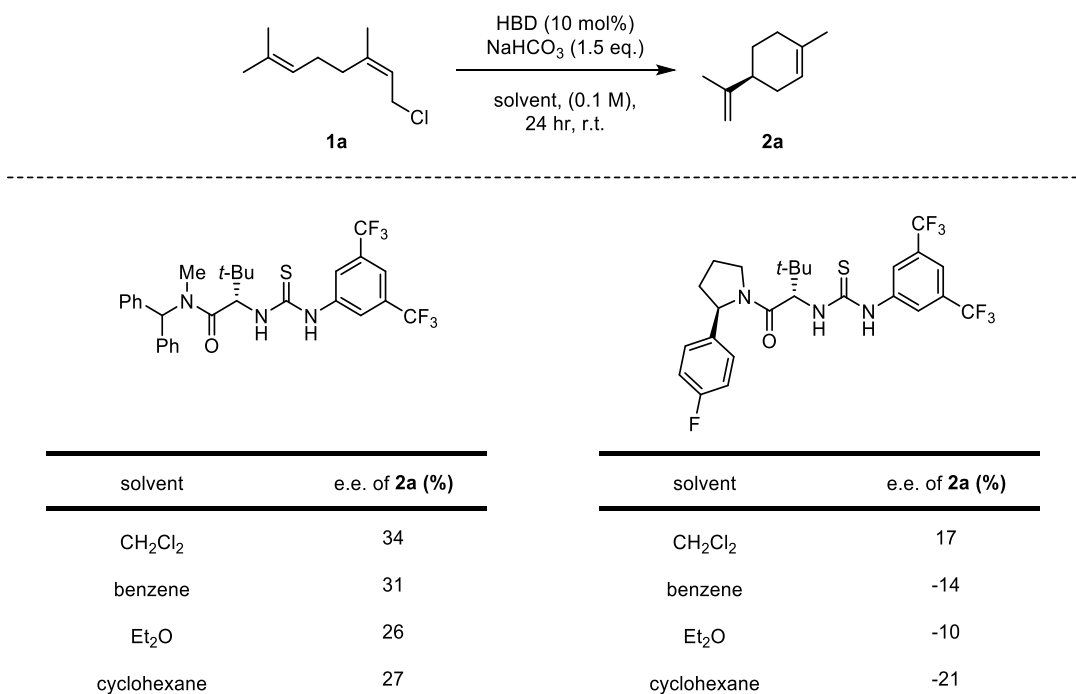

**Figure S1.** Representative solvent screening data for neryl chloride. All reactions were run according to the general procedure for reaction optimization with **1a**.

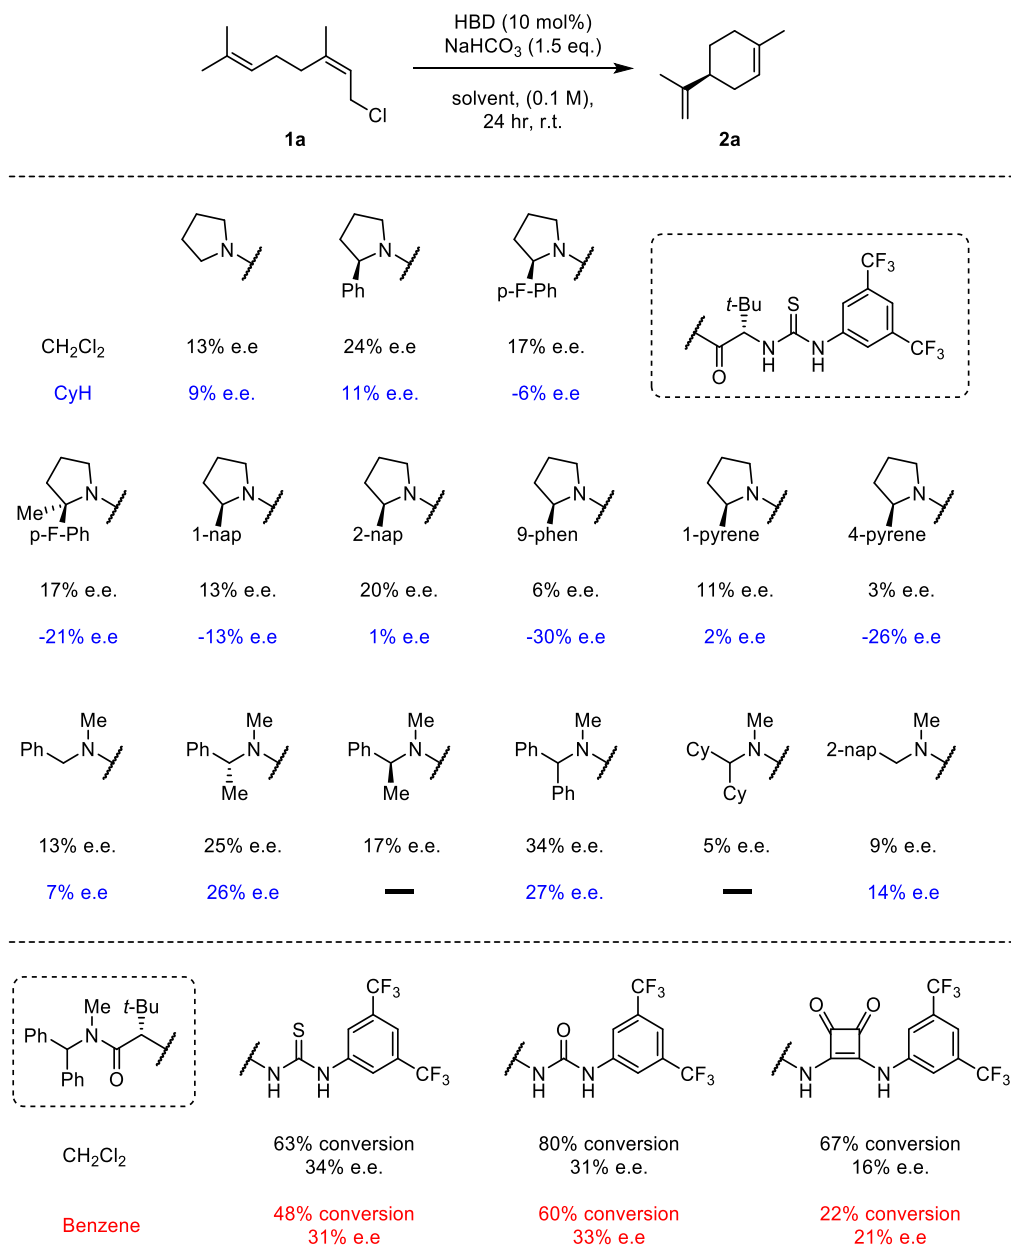

**Figure S2.** Representative catalyst screening data for neryl chloride (3,5-bis(trifluoromethyl)phenyl aniline-*t*-leucine catalysts). All reactions were run according to the general procedure for reaction optimization with **1a**. Approximate conversion was determined with crude NMR analysis of the reaction by comparing the sum of all products to unreacted starting material (no internal standard was used).

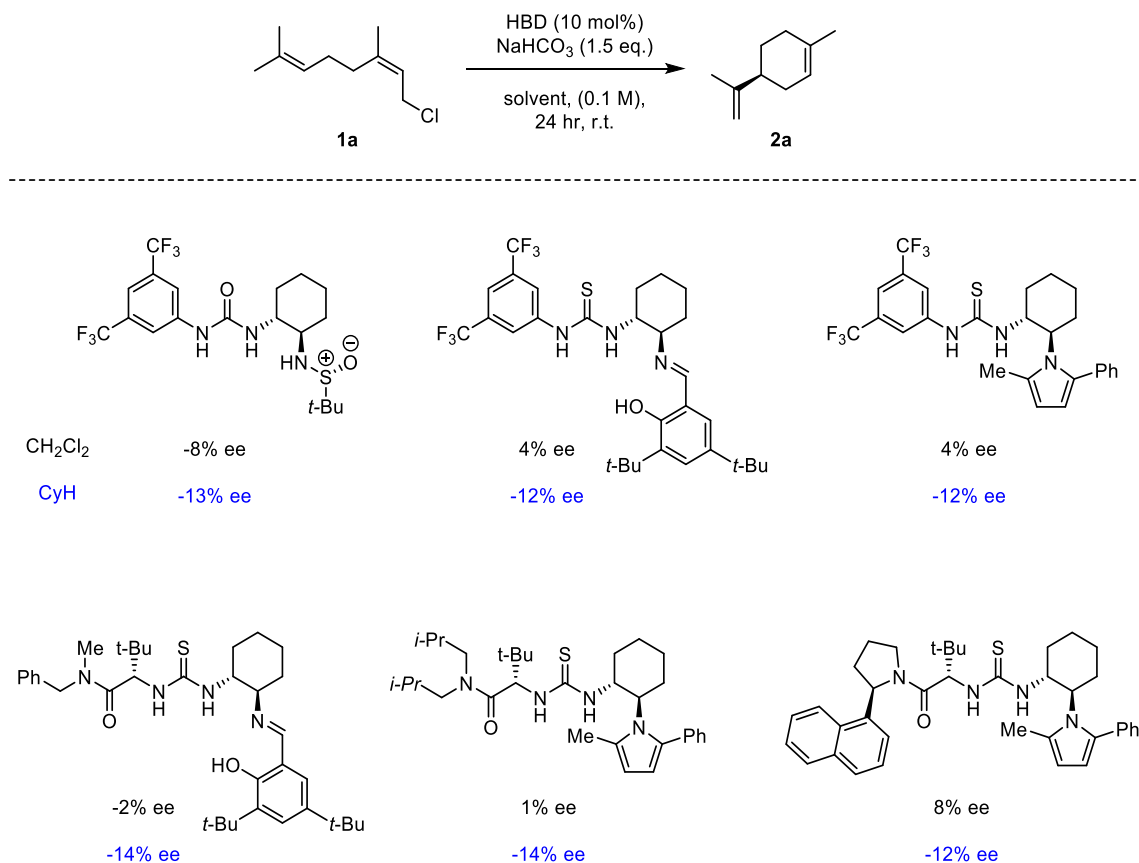

**Figure S3.** Representative catalyst screening data for neryl chloride (catalysts with a cyclohexane diamine fragment). All reactions were run according to the general procedure for reaction optimization with **1a**.

## 5.2 Optimization with **1b** and **1d**

**General procedure for reaction optimization with **1b** and **1d**:** All optimization-scale experiments were carried out using 0.05 mmol of substrate **1b** or **1d**, a 10 mol% (0.005 mmol) loading of hydrogen bond donor catalyst, base (typically 1.5 equiv., 0.075 mmol), and 500  $\mu$ L of solvent (0.1 M) at room temperature for 24 hours. A stock solution (250  $\mu$ L) of HBD catalyst in the desired solvent was added to a 250  $\mu$ L solution of **1** and base to initiate reactions. All reactions were carried out in sealed oven-dried screw-cap vials under air. In all cases, reactions were determined to have proceeded to full conversion of substrates **1**, resulting exclusively in products **2-5**. Product distributions were assessed from crude <sup>1</sup>H NMR spectra. Enantiomeric excess (e.e.) values were determined using an Agilent 7890A series GC system outfitted with a commercially available cyclosil- $\beta$  30m column. Method for **1b**: 150  $^{\circ}$ C isocratic, 7psi,  $t_r$ (major): 28.7 min.  $t_r$ (minor): 29.4 min. Method for **1d**: 120  $^{\circ}$ C to 200  $^{\circ}$ C at 0.5  $^{\circ}$ C/min, 7psi,  $t_r$ (major): 61.9 min.  $t_r$ (minor): 63.0 min.



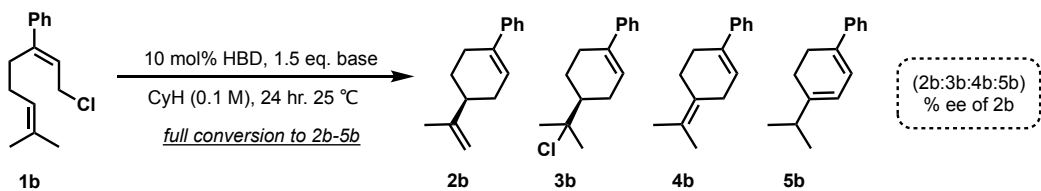

screen of chiral hydrogen bond donors

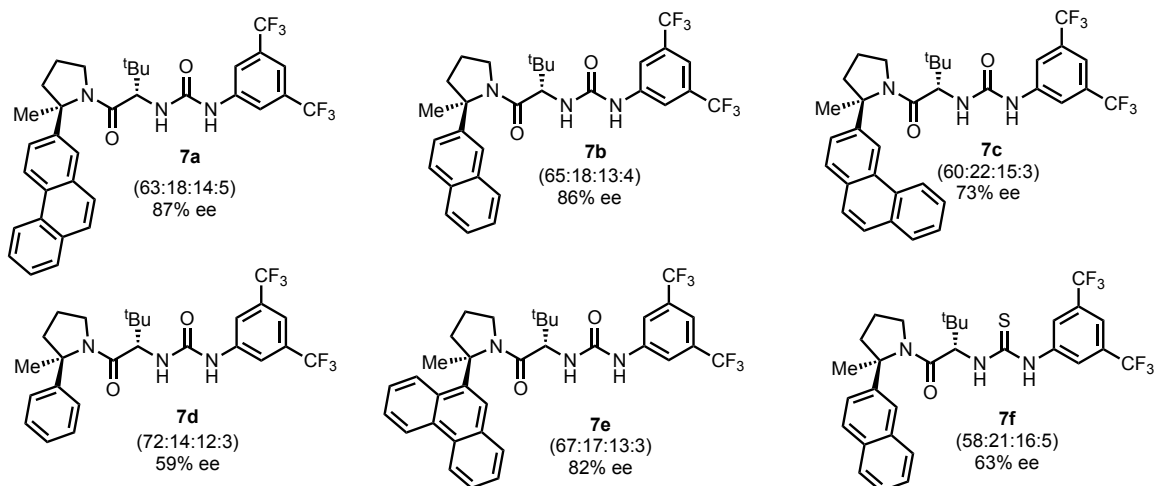

screen of solvents

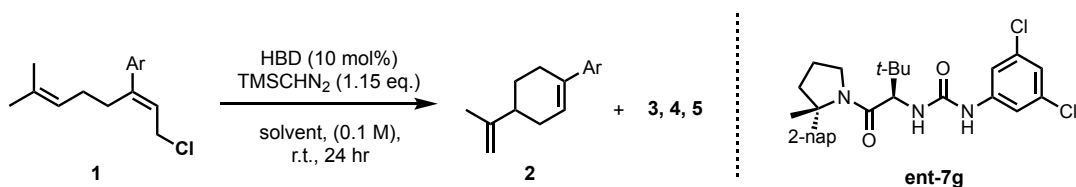

| entry          | substrate | HBD    | solvent           | conversion | e.e. of 2 (%) |
|----------------|-----------|--------|-------------------|------------|---------------|
| 1 <sup>#</sup> | 1d        | 7b     | cyclohexane       | complete   | 91            |
| 2              | 1d        | 7b     | toluene           | complete   | 87            |
| 3              | 1d        | 7b     | dichloromethane   | complete   | 78            |
| 4              | 1b        | ent-7g | cyclohexane       | complete   | -84           |
| 5 <sup>†</sup> | 1b        | ent-7g | cyclohexane       | complete   | -84           |
| 6 <sup>†</sup> | 1b        | ent-7g | benzene           | complete   | -77           |
| 7 <sup>†</sup> | 1b        | ent-7g | toluene           | complete   | -81           |
| 8 <sup>†</sup> | 1b        | ent-7g | Et <sub>2</sub> O | 50%        | ND            |
| 9 <sup>†</sup> | 1b        | ent-7g | <i>t</i> -BuOMe   | 47%        | ND            |

# - 1.5 eq. NaHCO<sub>3</sub> was used in place of TMSCHN<sub>2</sub>; † - an ethereal solution of TMSCHN<sub>2</sub> (2.0 M) was used

Figure S4. Representative catalyst and solvent optimization data for **1b** and **1d**. All reactions were run according to the general procedure for reaction optimization.

screen of bases

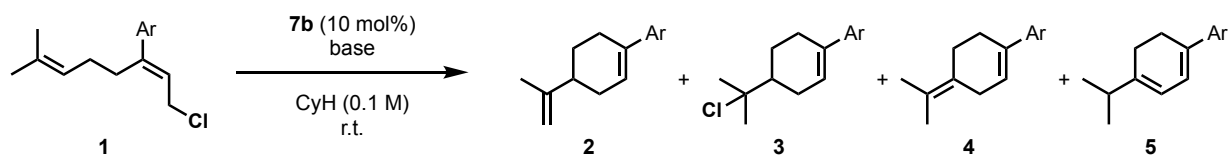

| entry            | substrate | base                            | loading (equiv.) | time (hr) | conversion | e.e. of 2 | [2 <sub>x</sub> ]:[3 <sub>x</sub> ]:[4 <sub>x</sub> ]:[5 <sub>x</sub> ] |
|------------------|-----------|---------------------------------|------------------|-----------|------------|-----------|-------------------------------------------------------------------------|
| 1                | <b>1b</b> | NaHCO <sub>3</sub>              | 1.5              | 24        | complete   | 86        | 68 : 19 : 9 : 4                                                         |
| 2 <sup>#,†</sup> | <b>1b</b> | TMSCHN <sub>2</sub>             | 1.15             | 36        | complete   | -85       | 68: 17 : 11 : 4                                                         |
| 3 <sup>#</sup>   | <b>1b</b> | 2,2,6,6-tetramethylpiperidine   | 1.5              | 22        | 7%         | ND        | ND                                                                      |
| 4 <sup>#</sup>   | <b>1b</b> | triethylamine                   | 1.5              | 22        | 8%         | ND        | ND                                                                      |
| 5 <sup>#</sup>   | <b>1b</b> | pyridine                        | 1.5              | 22        | 13%        | ND        | ND                                                                      |
| 6 <sup>#</sup>   | <b>1b</b> | 2,6-di-t-butyl-4-methylpyridine | 1.5              | 22        | 11%        | ND        | ND                                                                      |
| 7                | <b>1d</b> | NaHCO <sub>3</sub>              | 1.5              | 36        | complete   | 91        | 70 : 13 : 13 : 4                                                        |
| 8                | <b>1d</b> | NaHCO <sub>3</sub>              | 1.1              | 36        | complete   | 91        | 70 : 13 : 13 : 4                                                        |
| 9                | <b>1d</b> | NaHCO <sub>3</sub>              | 3                | 36        | complete   | 91        | 70 : 13 : 13 : 4                                                        |
| 10               | <b>1d</b> | Na <sub>2</sub> CO <sub>3</sub> | 1.5              | 36        | complete   | 91        | 71 : 13 : 12 : 4                                                        |
| 11               | <b>1d</b> | K <sub>2</sub> CO <sub>3</sub>  | 1.5              | 36        | complete   | 91        | 72 : 12 : 12 : 4                                                        |
| 12               | <b>1d</b> | Cs <sub>2</sub> CO <sub>3</sub> | 1.5              | 36        | complete   | 91        | 71 : 12 : 13 : 4                                                        |

# - **ent-7b** was used; † - a 5 mol% loading of urea was used.

**Figure S5.** Representative base optimization data for **1b** and **1d**. All reactions were run according to the general procedure for reaction optimization.

## 6. Catalytic Enantioselective Cyclization Reactions

### 6.1 General procedures

#### Procedure for Enantioselective Cyclization of Substrate **1a**

Hydrogen bond donor catalyst **7a** (0.015 mmol, 0.0094 g, 10 mol%) and sodium bicarbonate (0.23 mmol, 0.019 g, 1.5 eq.) were weighed directly into a flame-dried 1 dram vial charged with a magnetic stir bar. Then, 500  $\mu$ L of deuterocyclohexane were added, followed by 1 mL of a 0.15 M stock solution of substrate **1a** (0.15 mmol) in deuterocyclohexane and 10  $\mu$ L of mesitylene internal standard. The reaction vial was capped and sealed with electrical tape. The reaction mixture was allowed to stir for 72 hours. After this time, 600  $\mu$ L of the crude reaction were transferred to a flame-dried NMR tube for analysis by  $^1\text{H}$  NMR. Yields of products **2a-5a** were determined relative to the mesitylene aromatic CH frequency (6.7 ppm) by  $^1\text{H}$  NMR. The enantiomeric excess value for limonene product **2a** was determined using an Agilent 7890A series GC system outfitted with a commercially available cyclosil- $\beta$  30m column (method: 50  $^\circ\text{C}$  to 80  $^\circ\text{C}$  at 1  $^\circ\text{C}/\text{min}$ , 7psi )  $t_r(\text{major})$ : 22.9 min.  $t_r(\text{minor})$ : 23.9 min.

#### General Procedure for Enantioselective Cyclization of Substrates **1b-1i**

Hydrogen bond donor catalyst **7a** (0.015 mmol, 0.0094 g, 10 mol%) and sodium bicarbonate (0.23 mmol, 0.019 g, 1.5 eq.) were weighed directly into a flame-dried 1 dram vial charged with a magnetic stir bar. Then, 500  $\mu$ L of anhydrous cyclohexane (CyH) were added, followed by 1 mL of a 0.15 M stock solution of substrate **1b-1i** (0.15 mmol) in CyH. The reaction vial was capped and sealed with electrical tape, and was allowed to stir for the following times: substrates **1b**, **1f**, **1g** (24 hr.), **1d**, **1e**, **1h** (48 hr.), **1a**, **1c**, **1i** (72 hr.). After this time, the crude reaction was transferred to a flame-dried 20 mL vial, concentrated *in vacuo* and resuspended in 1.5 mL of  $\text{CDCl}_3$  with 10  $\mu$ L of mesitylene internal standard (substrates **1b-1d**, **1f**, **1g**, and **1i**) or 1.5 mL of a 0.1 M solution of mesitylene in  $\text{CDCl}_3$  (substrates **1e** and **1h**) for analysis by  $^1\text{H}$  NMR. In all cases, full conversion of the reactive E isomer of substrates **1b-1i** was observed. Yields of products **2-5** were determined relative to the mesitylene aromatic CH frequency (6.7 ppm) by  $^1\text{H}$  NMR and are corrected to account for the presence of the unreactive Z isomer of substrates **1b-1i**. Enantiomeric excess values for products **2** and **3** were determined using an Agilent 7890A series GC system outfitted with a commercially available cyclosil- $\beta$  30m column.

### 6.2 NMR analysis & GC traces of reactions involving substrates **1a-1i**

crude reaction of 1a, ( $C_6D_{12}$ , 600 MHz)

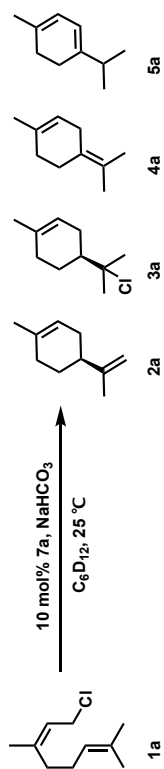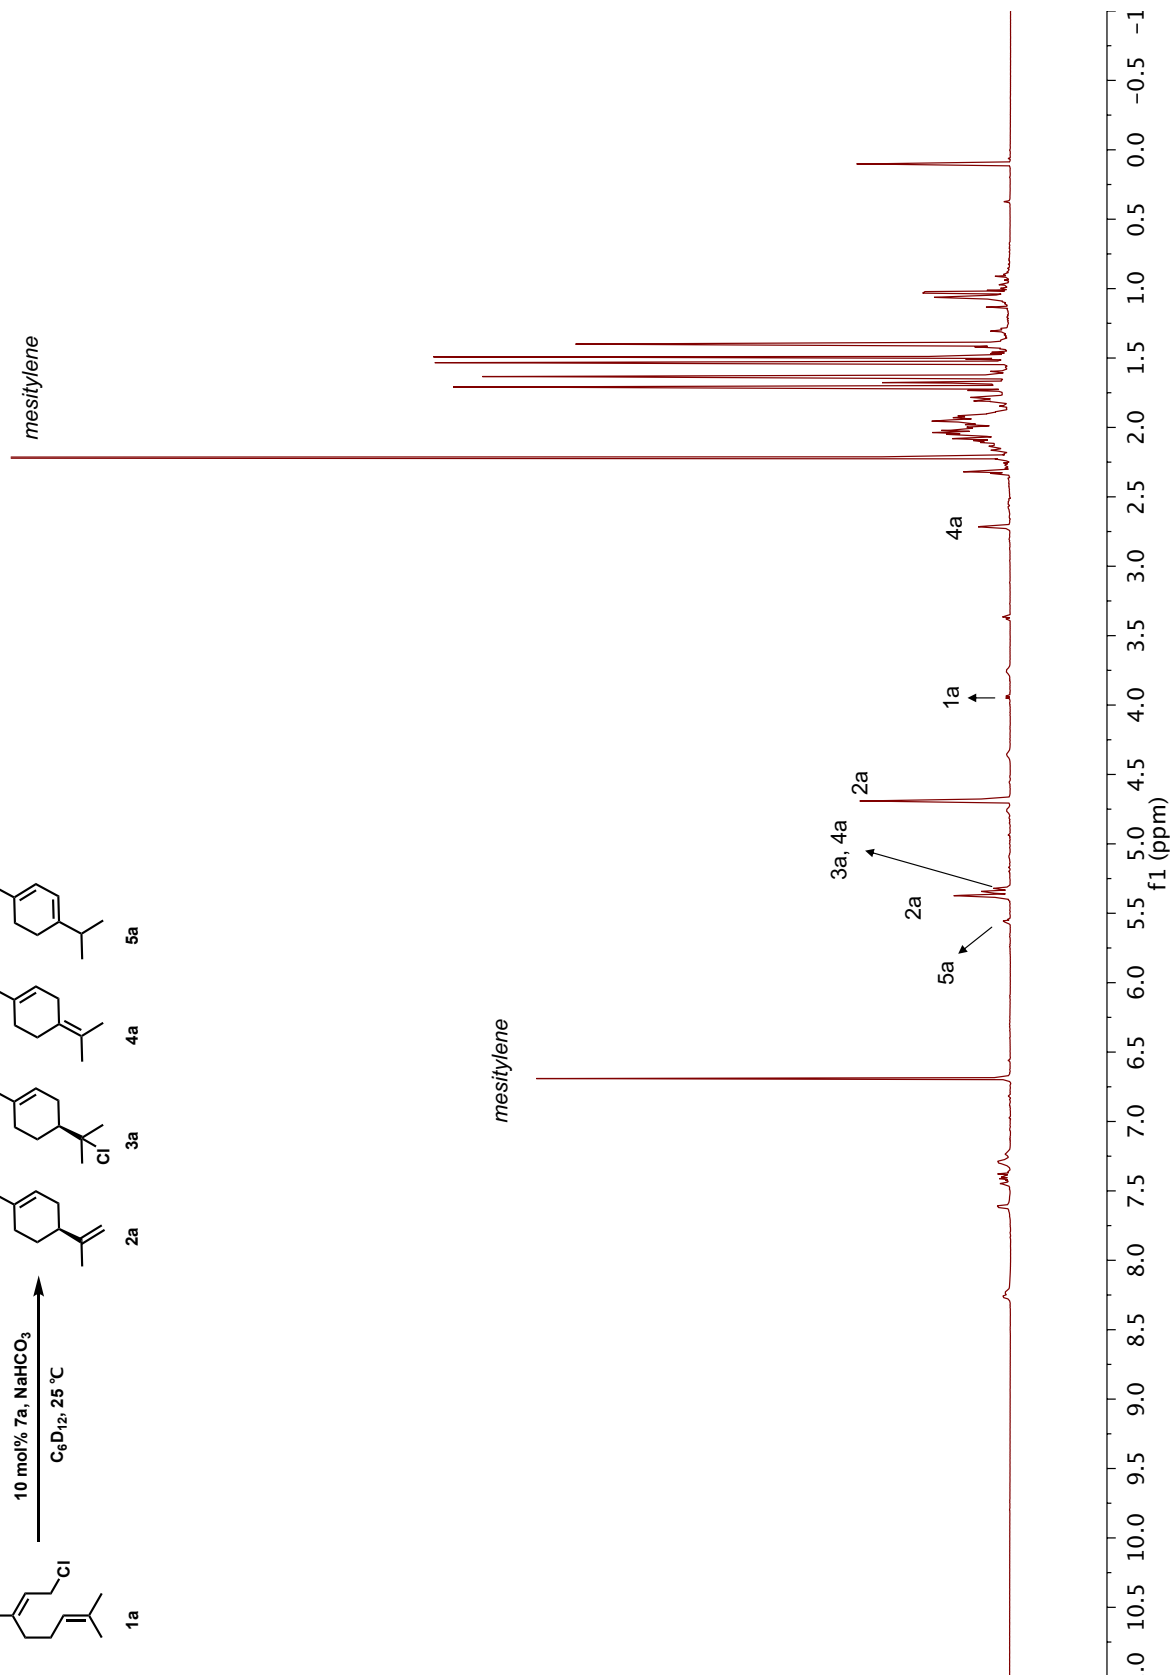

crude reaction of 1a, ( $C_6D_{12}$ , 600 MHz)

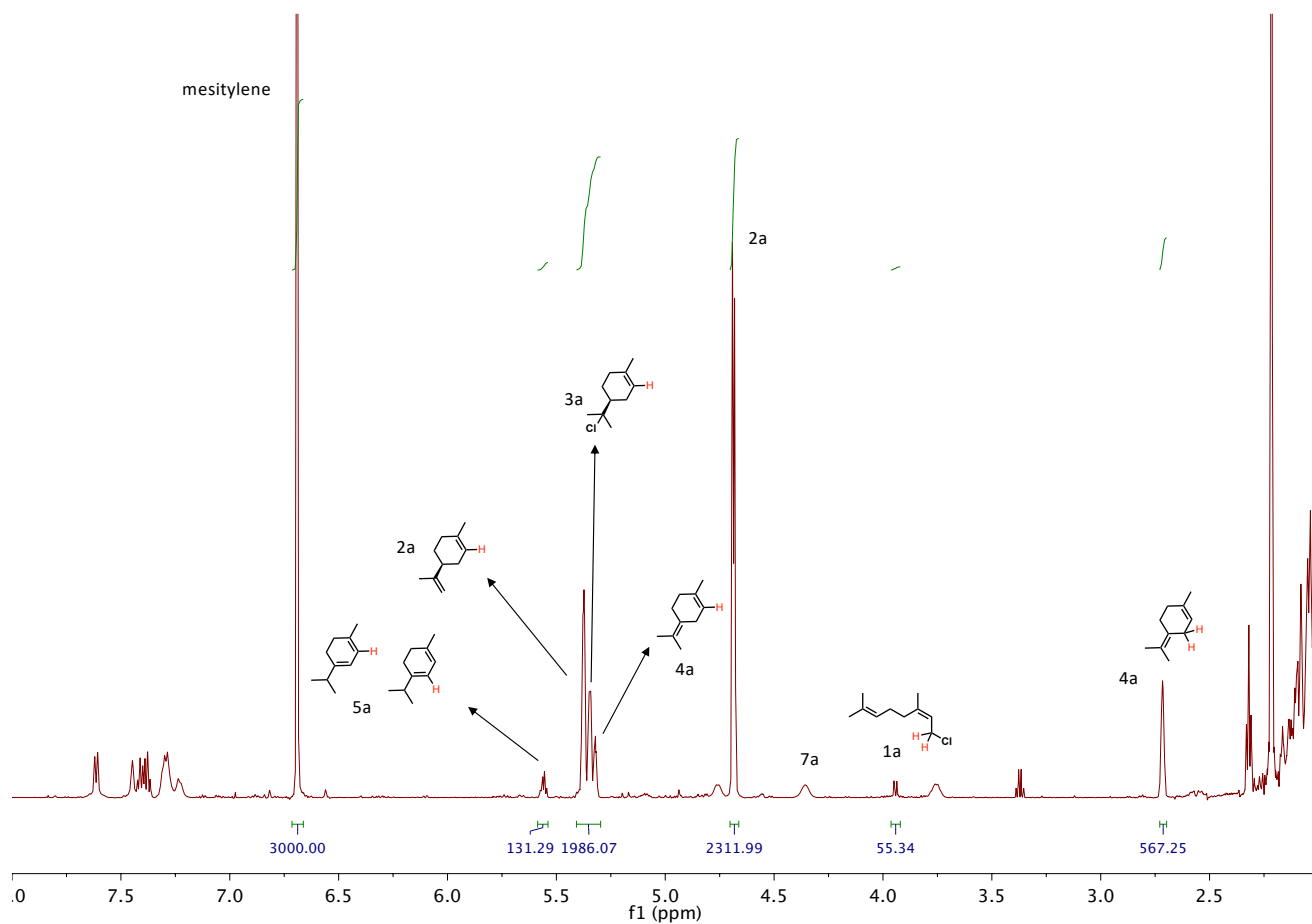

| Mesitylene (M) | 2a (M)      | 3a (M)     | 4a (M)    | 5a (M)   | 1a (M)      | PDT        | Mass Balance |
|----------------|-------------|------------|-----------|----------|-------------|------------|--------------|
| 0.047606       | 0.055032536 | 0.02482653 | 0.0134963 | 0.003142 | 0.001047332 | 0.09649736 | 0.097544694  |
| Sample         | 2a (%)      | 3a (%)     | 4a (%)    | 5a (%)   |             | Conv. (%)  | Yield (%)    |
| 1a             | 55.03       | 24.83      | 13.50     | 3.14     |             | 98.95      | 96.50        |

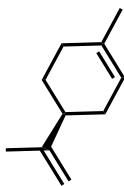

GC (cyclosil- $\beta$ , 30 m)  
50 °C - 80 °C, 1 °C/min, 7 psi

**2a, 9% ee**

*~1:1 mixture of authentic R&S-limonene (-10% ee)*

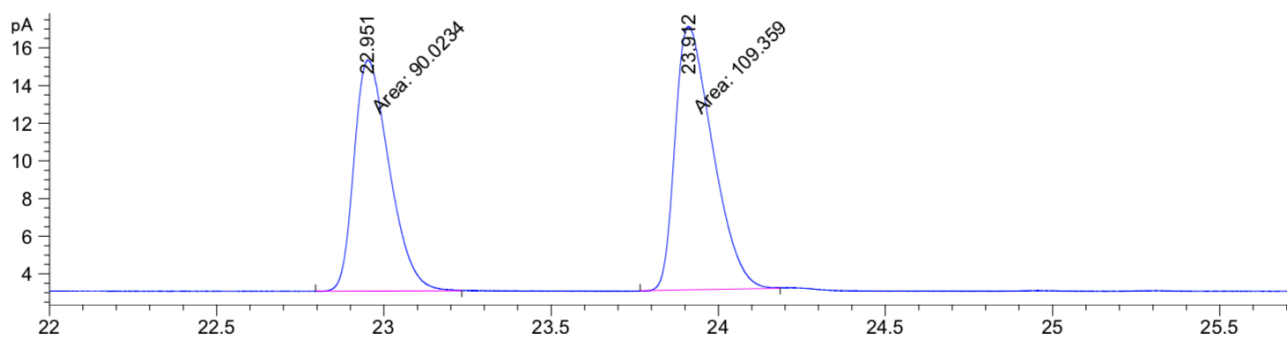

| Peak # | RetTime [min] | Type | Width [min] | Area [pA*s] | Height [pA] | Area %   |
|--------|---------------|------|-------------|-------------|-------------|----------|
| 1      | 22.951        | MM   | 0.1221      | 90.02339    | 12.28328    | 45.15109 |
| 2      | 23.912        | MM   | 0.1303      | 109.35913   | 13.98554    | 54.84891 |

*enantioenriched sample*

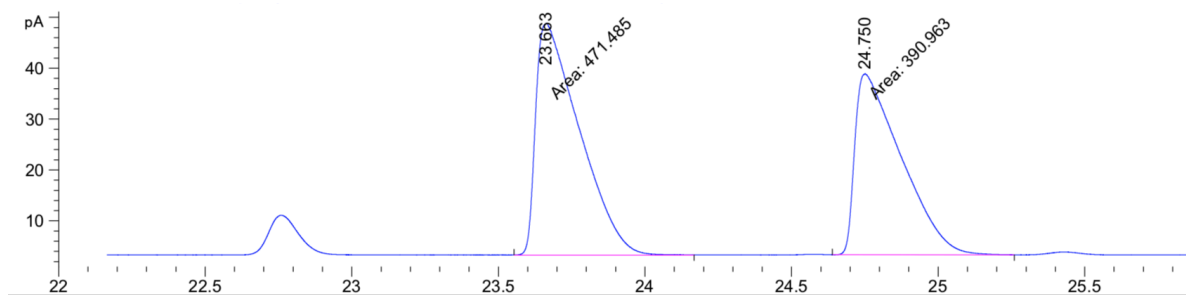

| Peak # | RetTime [min] | Type | Width [min] | Area [pA*s] | Height [pA] | Area %   |
|--------|---------------|------|-------------|-------------|-------------|----------|
| 1      | 23.663        | MM   | 0.1726      | 471.48495   | 45.52736    | 54.66824 |
| 2      | 24.750        | MM   | 0.1831      | 390.96268   | 35.58746    | 45.33176 |

crude reaction of 1b, (CDCl<sub>3</sub>, 600 MHz)

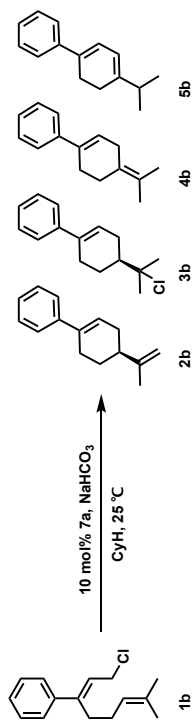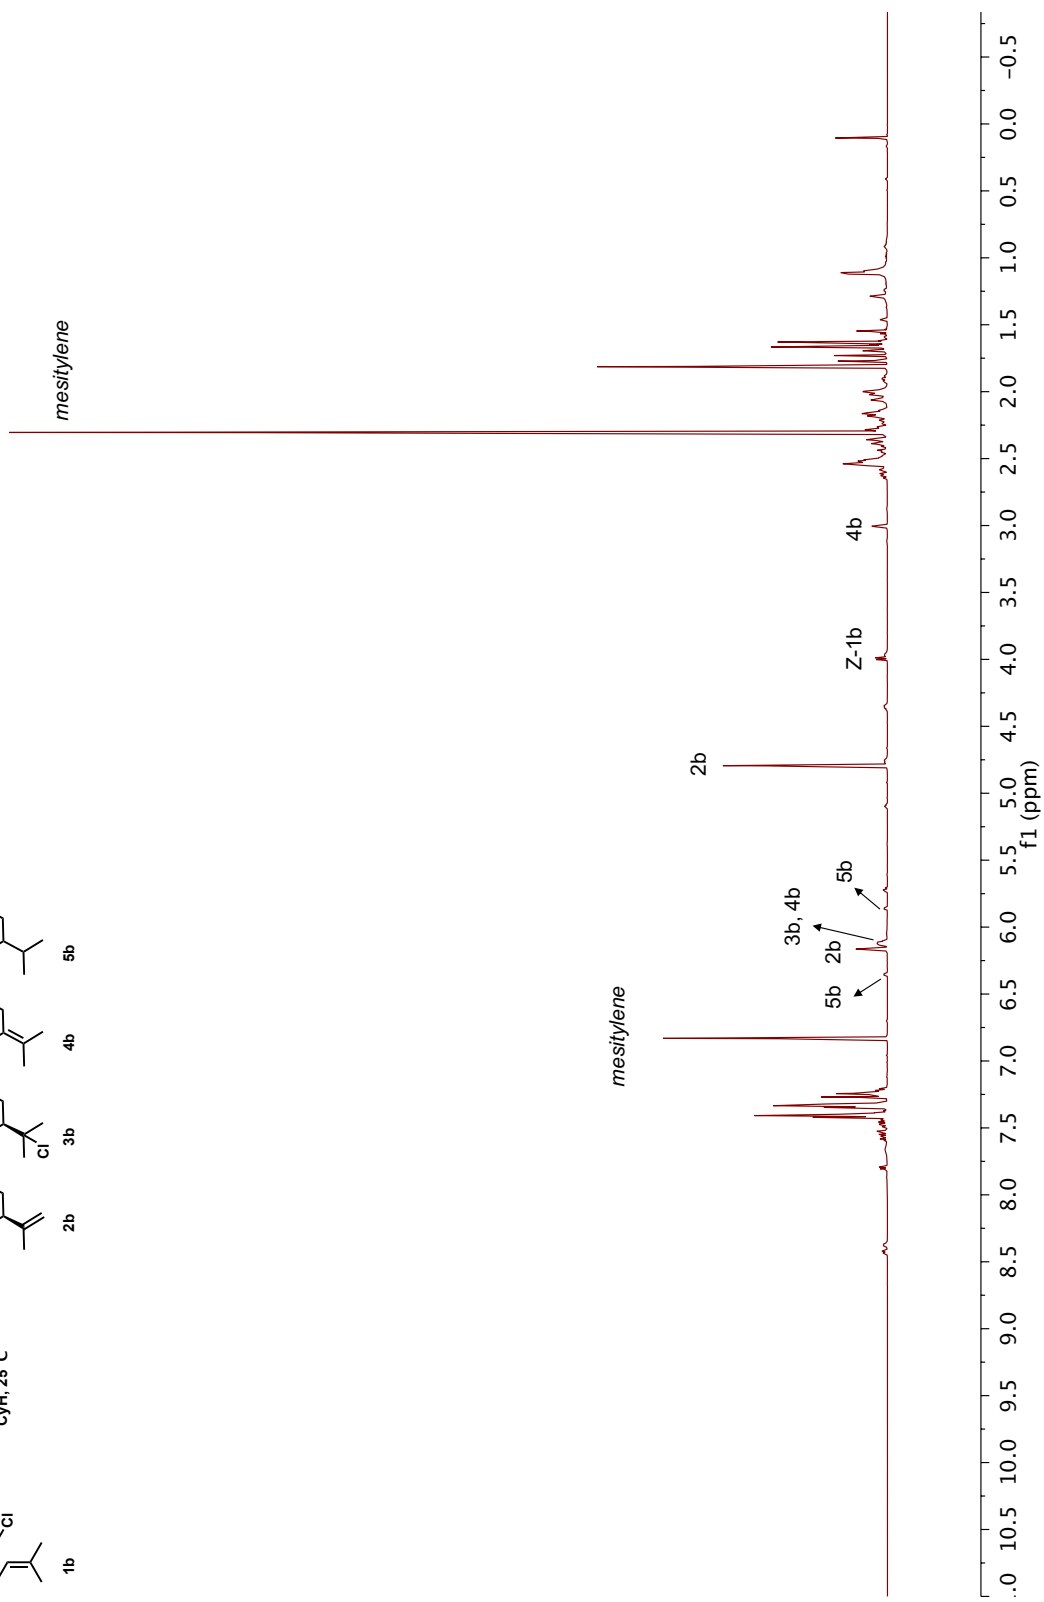

crude reaction of 1b, (CDCl<sub>3</sub>, 600 MHz)

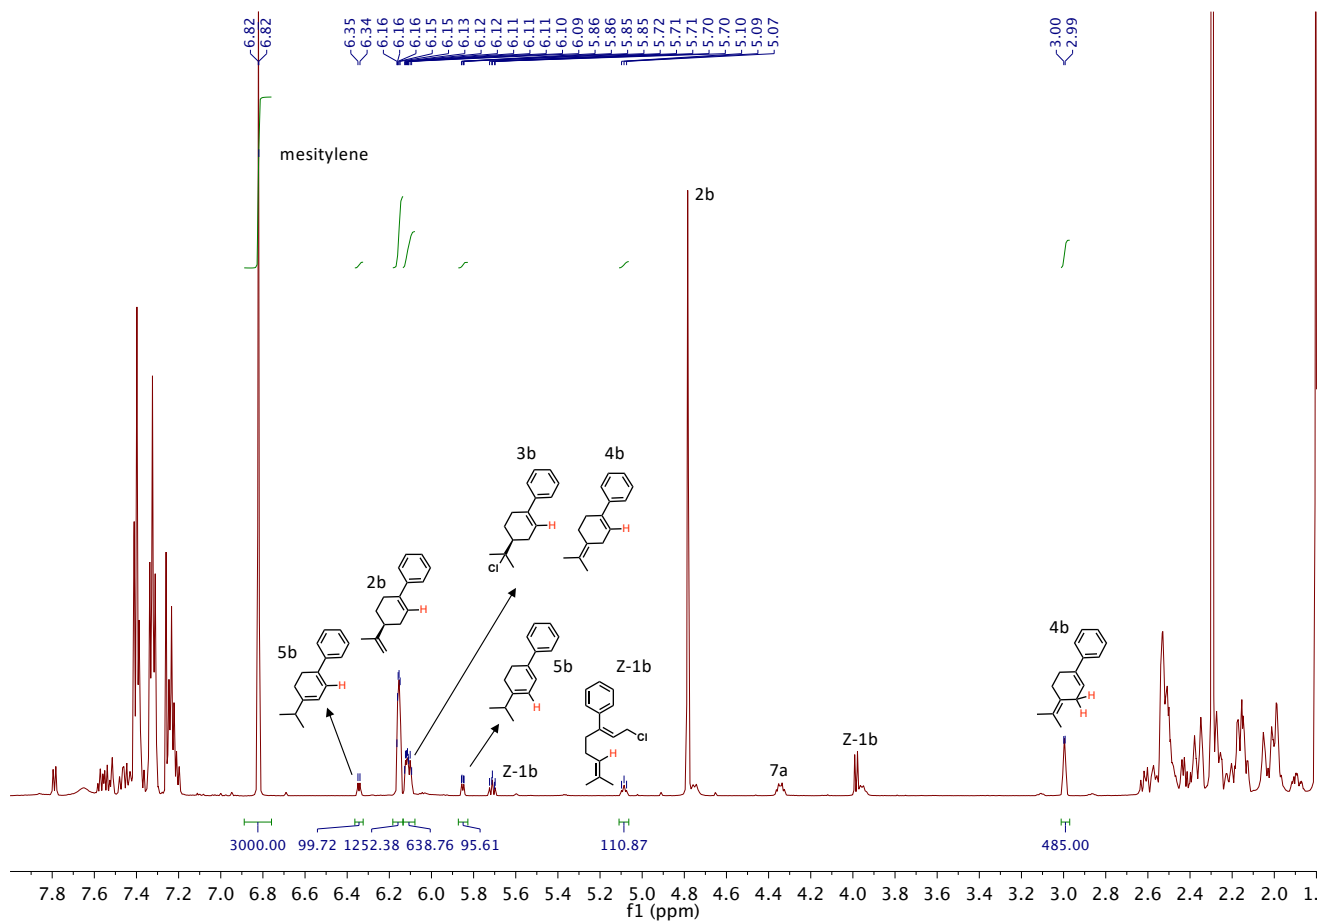

| Mesitylene (M) | 2b (M)      | 3b (M)     | 4b (M)     | 5b (M)     | Z-1b (M)    | PDT (M)    | Mass Balance |
|----------------|-------------|------------|------------|------------|-------------|------------|--------------|
| 0.047606742    | 0.059603641 | 0.01882847 | 0.01154463 | 0.00452264 | 0.005236742 | 0.09449938 | 0.099736124  |
| Sample         | 2b (%)      | 3b (%)     | 4b (%)     | 5b (%)     |             | Conv. (%)  | Yield (%)    |
| 1b             | 62.90       | 19.87      | 12.18      | 4.77       |             | 100.00     | 99.72        |



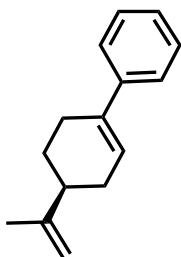

**2b, 87% ee**

GC (cyclosil- $\beta$ , 30 m)  
150 °C, isocratic, 40 min, 7 psi

*racemic sample*

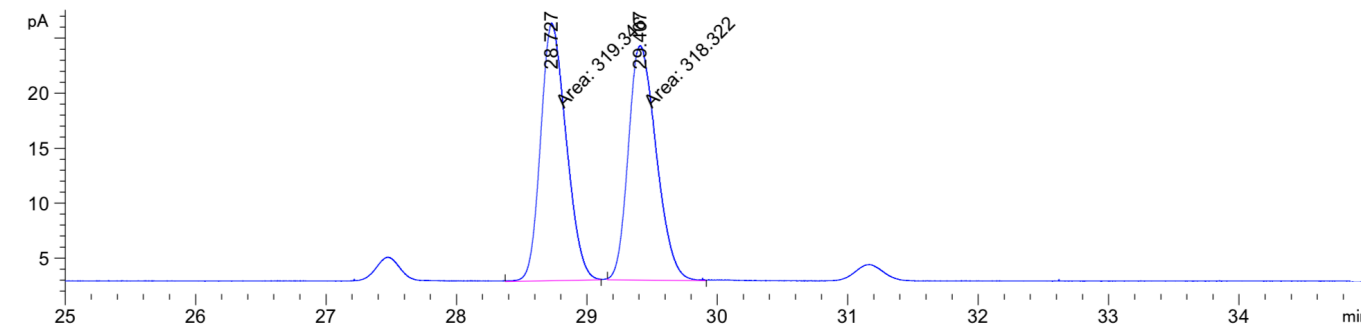

| Peak # | RetTime [min] | Type | Width [min] | Area [pA*s] | Height [pA] | Area %   |
|--------|---------------|------|-------------|-------------|-------------|----------|
| 1      | 28.727        | MM   | 0.2271      | 319.34555   | 23.44049    | 50.08029 |
| 2      | 29.407        | MM   | 0.2483      | 318.32153   | 21.36424    | 49.91971 |

*enantiomeriched sample*

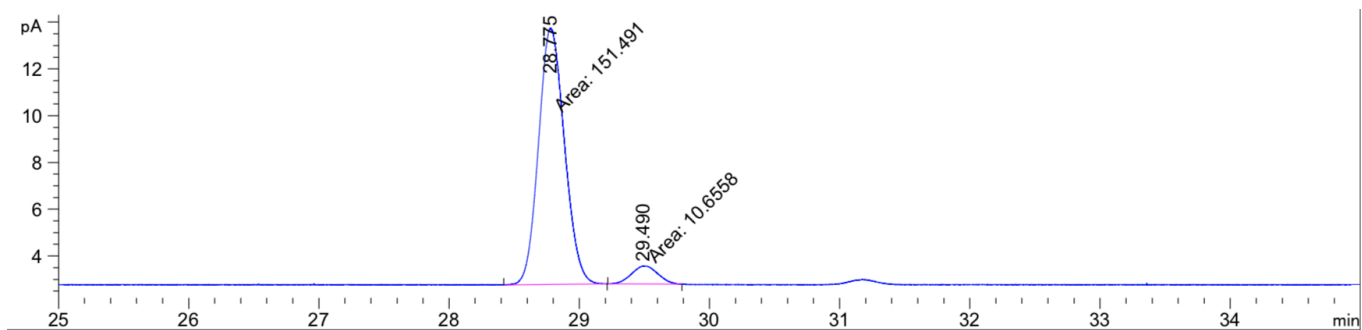

| Peak # | RetTime [min] | Type | Width [min] | Area [pA*s] | Height [pA] | Area %   |
|--------|---------------|------|-------------|-------------|-------------|----------|
| 1      | 28.775        | MM   | 0.2303      | 151.49139   | 10.96295    | 93.42832 |
| 2      | 29.490        | MM   | 0.2324      | 10.65580    | 7.64076e-1  | 6.57168  |

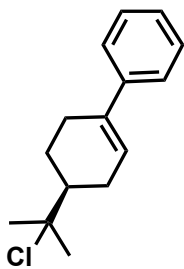

**3b, 86% ee**

HPLC (Chiralcel OJ-H)  
0.5% IPA isocratic, 1 mL/min, 30 min, 254 nm

*racemic sample*

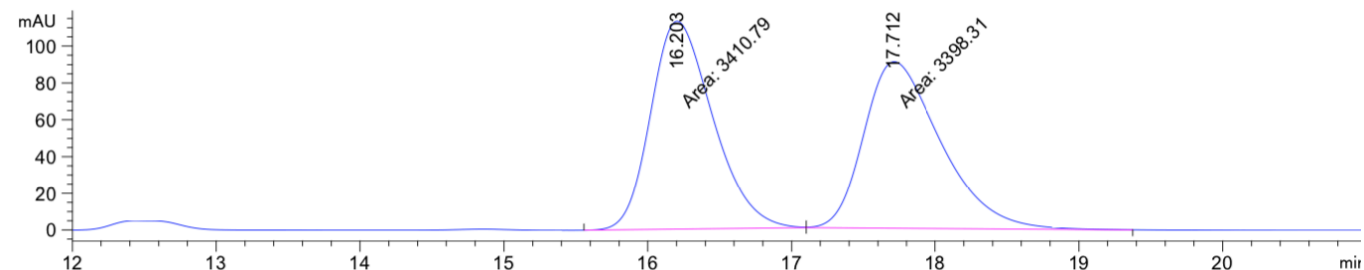

| Peak # | RetTime [min] | Type | Width [min] | Area [mAU*s] | Height [mAU] | Area %  |
|--------|---------------|------|-------------|--------------|--------------|---------|
| 1      | 16.203        | MM   | 0.5022      | 3410.78735   | 113.19047    | 50.0916 |
| 2      | 17.712        | MM   | 0.6242      | 3398.30981   | 90.73719     | 49.9084 |

*enantioenriched sample*

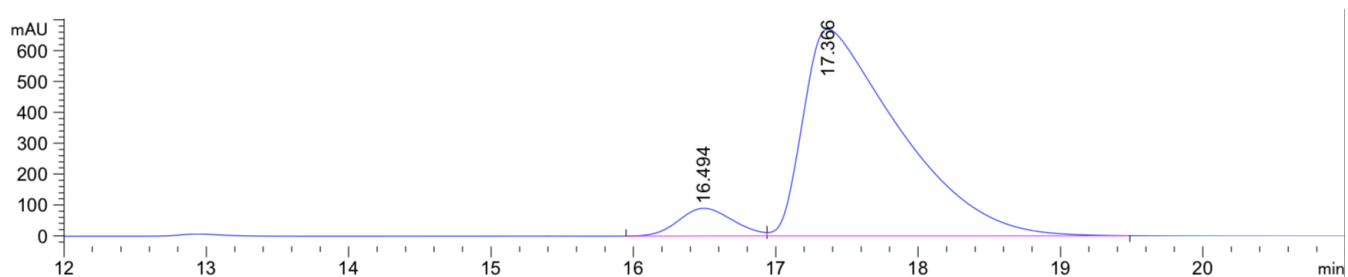

| Peak # | RetTime [min] | Type | Width [min] | Area [mAU*s] | Height [mAU] | Area %  |
|--------|---------------|------|-------------|--------------|--------------|---------|
| 1      | 16.494        | BV   | 0.4156      | 2405.01953   | 90.04417     | 7.1006  |
| 2      | 17.366        | VB   | 0.6818      | 3.14657e4    | 670.13757    | 92.8994 |

crude reaction of 1c, (CDCl<sub>3</sub>, 600 MHz)

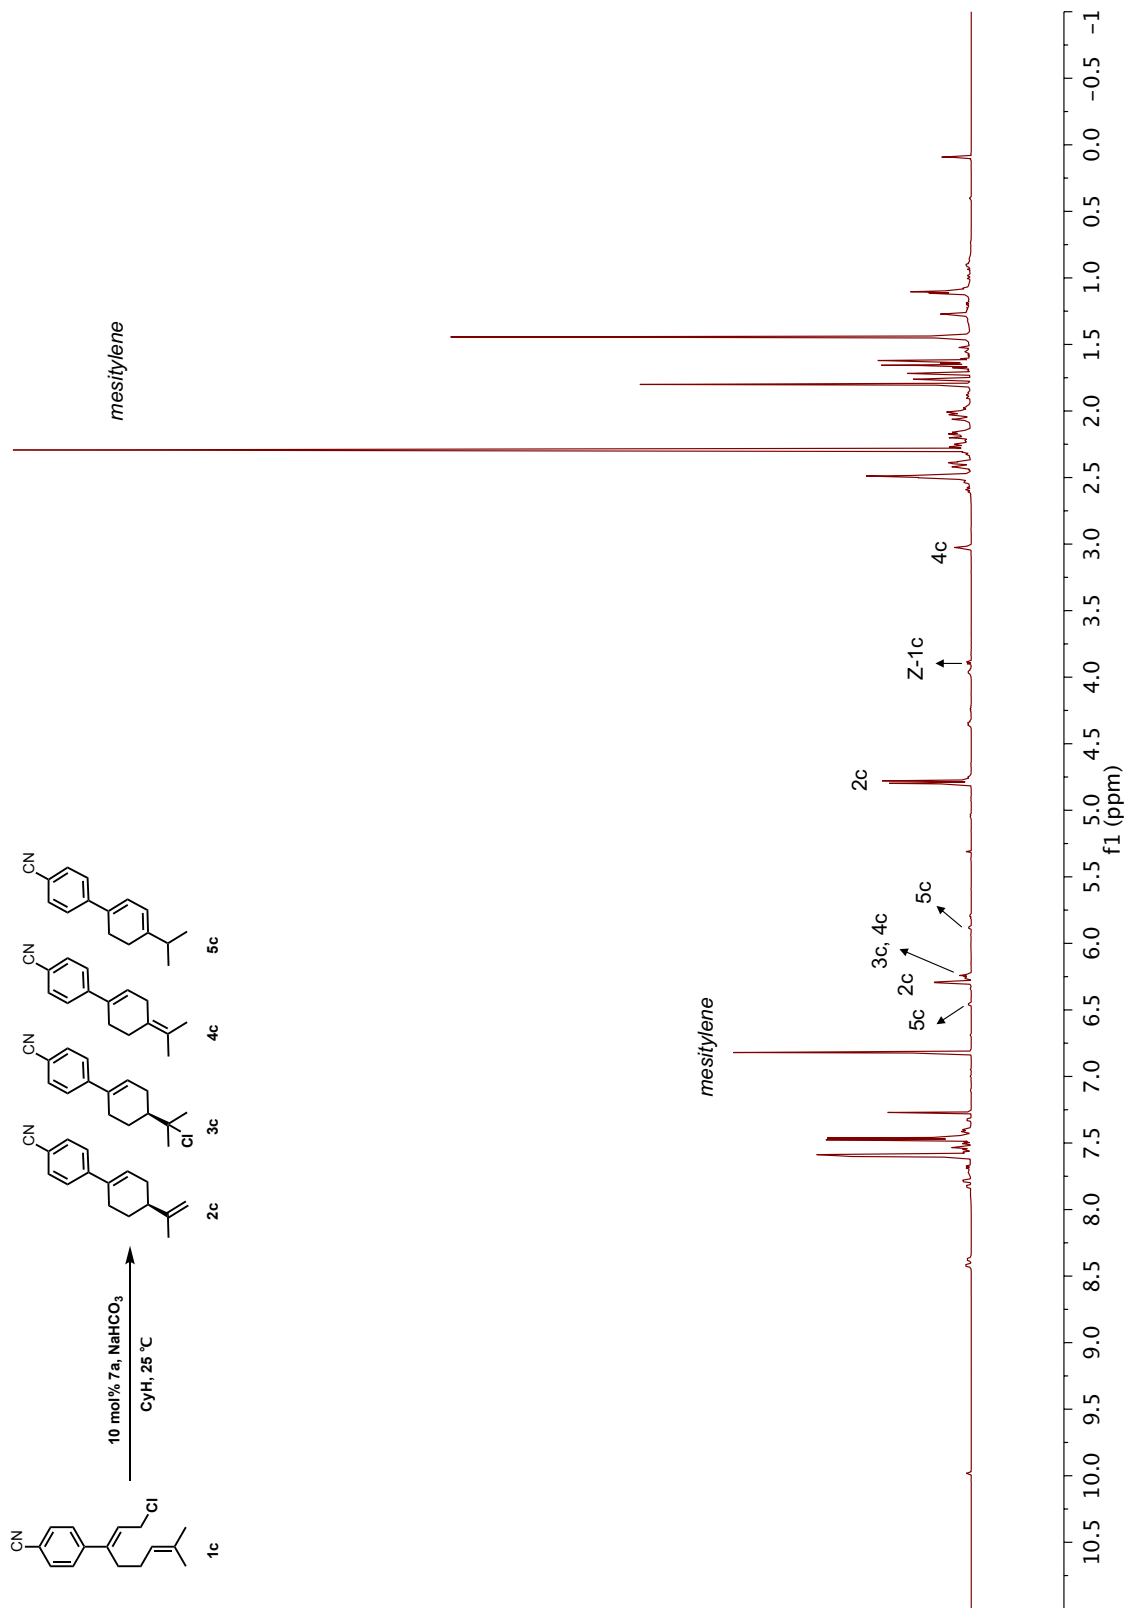

crude reaction of 1c, (CDCl<sub>3</sub>, 600 MHz)

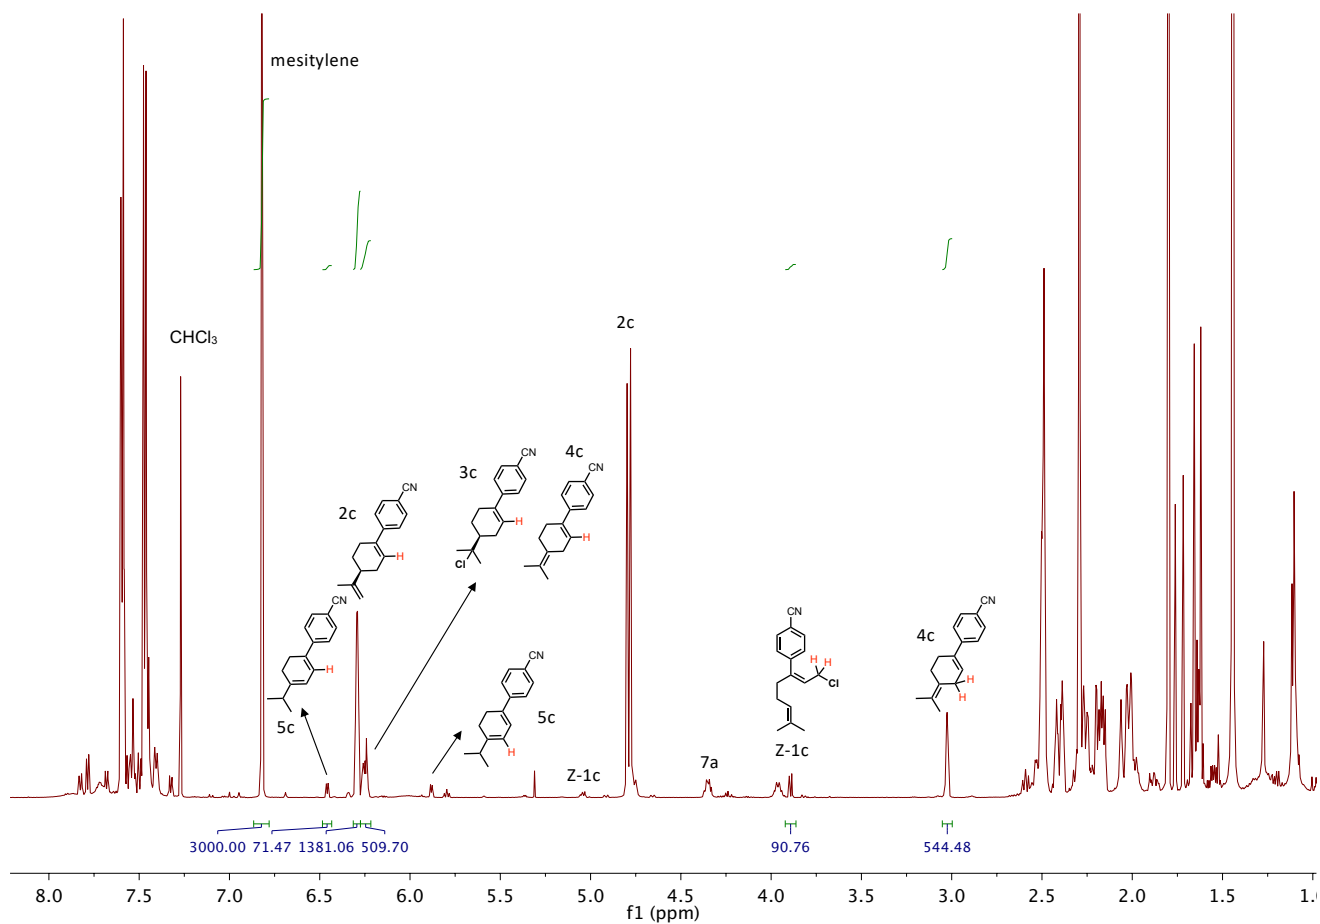

| Mesitylene (M) | 2c (M)      | 3c (M)    | 4c (M)     | 5c (M)     | Z-1c (M)    | PDT        | Mass Balance |
|----------------|-------------|-----------|------------|------------|-------------|------------|--------------|
| 0.047606742    | 0.065744911 | 0.0113066 | 0.01297284 | 0.00342769 | 0.002142303 | 0.09345203 | 0.095594338  |
| Sample         | 2c (%)      | 3c (%)    | 4c (%)     | 5c (%)     |             | Conv. (%)  | Yield (%)    |
| 1c             | 67.18       | 11.55     | 13.26      | 3.50       |             | 100.00     | 95.50        |

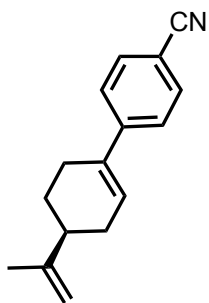

GC (cyclosil- $\beta$ , 30 m)  
140 °C - 180 °C, 0.3 °C/min, 7 psi

*racemic sample*

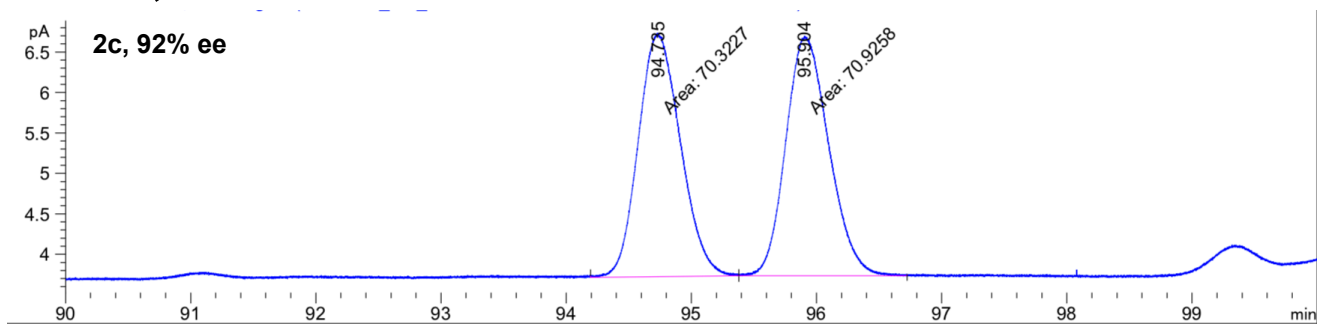

| Peak # | RetTime [min] | Type | Width [min] | Area [pA*s] | Height [pA] | Area %   |
|--------|---------------|------|-------------|-------------|-------------|----------|
| 1      | 94.735        | MM   | 0.3900      | 70.32269    | 3.00535     | 49.78652 |
| 2      | 95.904        | MM   | 0.3989      | 70.92578    | 2.96352     | 50.21348 |

*enantioenriched sample*

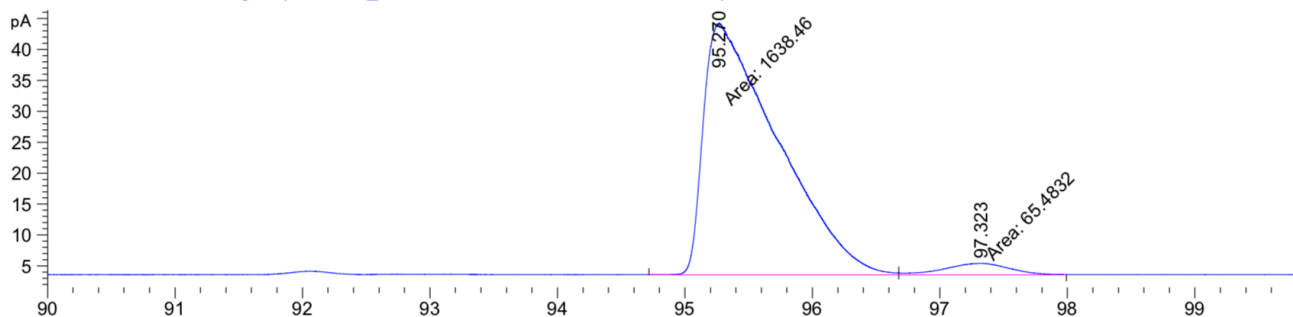

| Peak # | RetTime [min] | Type | Width [min] | Area [pA*s] | Height [pA] | Area %   |
|--------|---------------|------|-------------|-------------|-------------|----------|
| 1      | 95.270        | MF   | 0.6703      | 1638.46021  | 40.74041    | 96.15696 |
| 2      | 97.323        | FM   | 0.5870      | 65.48323    | 1.85935     | 3.84304  |

crude reaction of 1d, (CDCl<sub>3</sub>, 600 MHz)

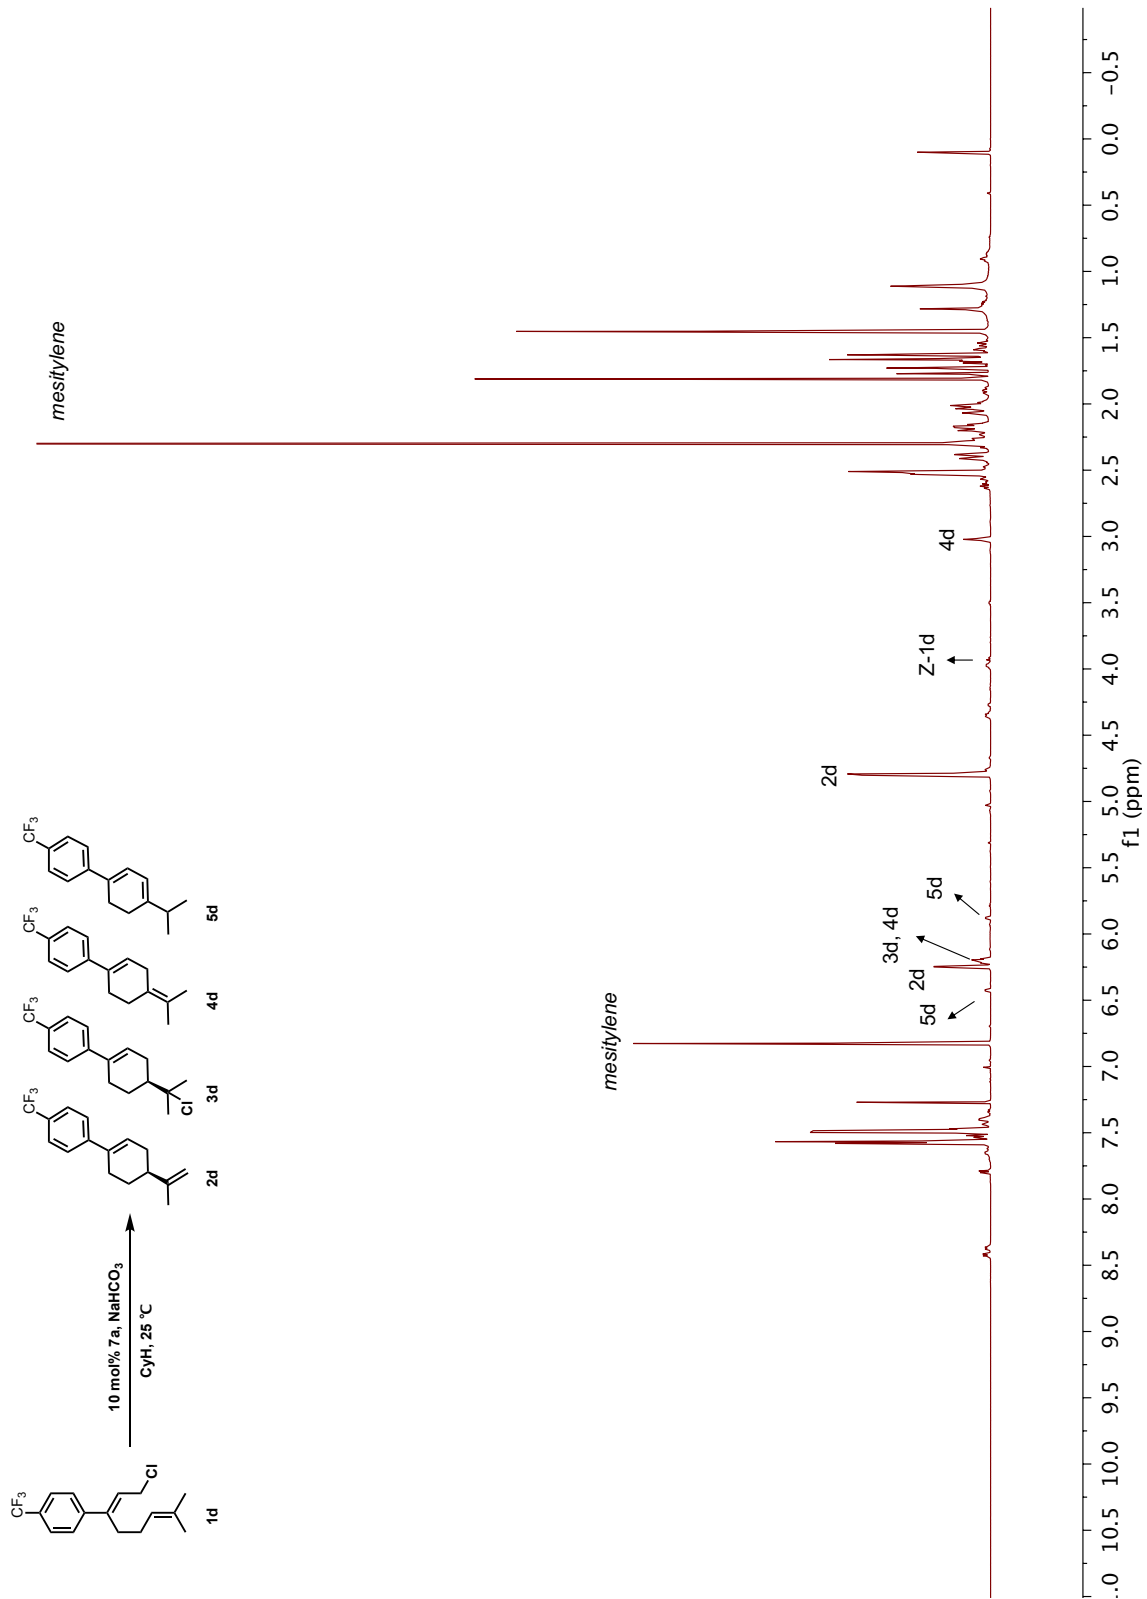

crude reaction of 1d, (CDCl<sub>3</sub>, 600 MHz)

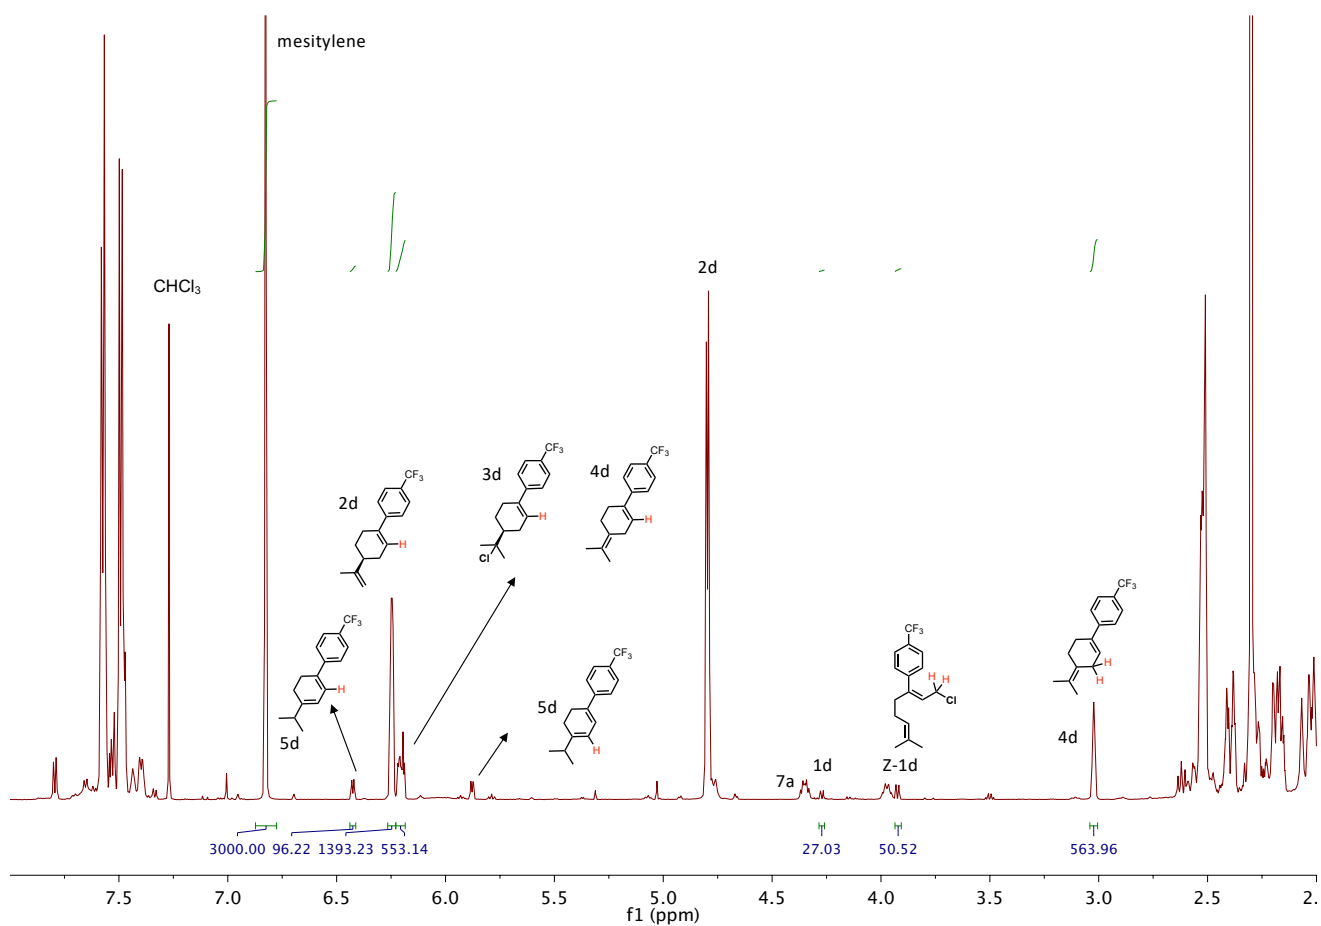

| Mesitylene (M) | 2d (M)      | 3d (M)     | 4d (M)    | 5d (M)     | Z-1d (M)    | PDT        | Mass Balance |
|----------------|-------------|------------|-----------|------------|-------------|------------|--------------|
| 0.047606742    | 0.066316191 | 0.01290143 | 0.0134251 | 0.00457025 | 0.001190169 | 0.09721297 | 0.09906963   |
| Sample         | 2d (%)      | 3d (%)     | 4d (%)    | 5d (%)     |             | Conv. (%)  | Yield (%)    |
| 1d             | 67.11       | 13.06      | 13.59     | 4.63       |             | 99.33      | 98.38        |

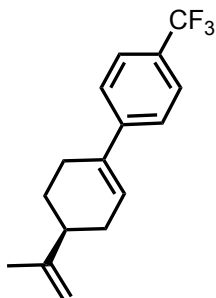

GC (cyclosil- $\beta$ , 30 m)  
120 °C - 200 °C, 0.5 °C/min, 7 psi

*racemic sample*

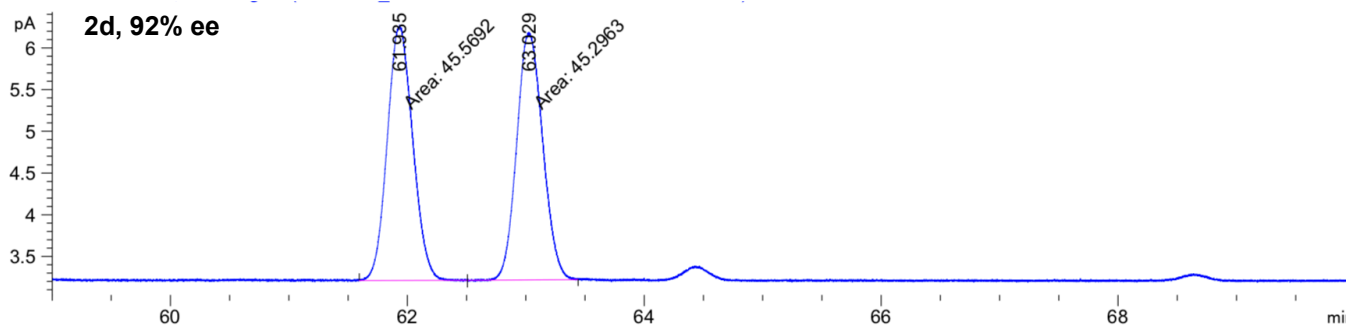

| Peak # | RetTime [min] | Type | Width [min] | Area [pA*s] | Height [pA] | Area %   |
|--------|---------------|------|-------------|-------------|-------------|----------|
| 1      | 61.935        | MF   | 0.2481      | 45.56916    | 3.06077     | 50.15017 |
| 2      | 63.029        | FM   | 0.2550      | 45.29626    | 2.96061     | 49.84983 |

*enantioenriched sample*

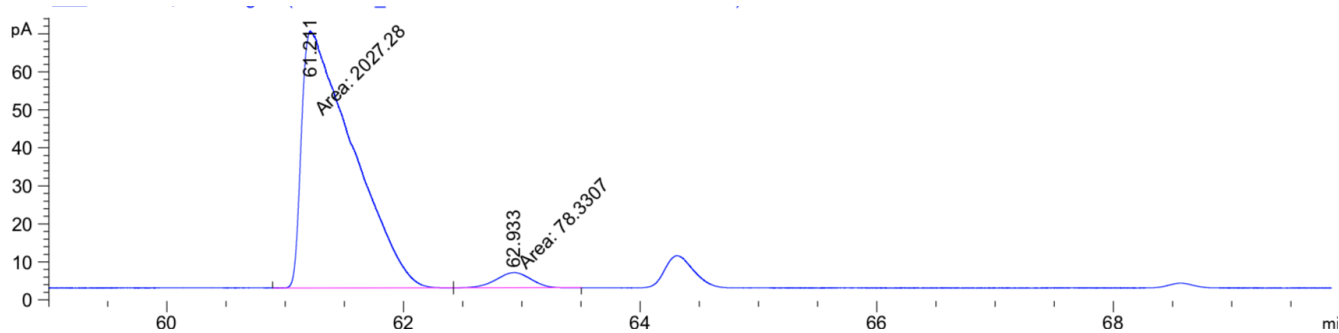

| Peak # | RetTime [min] | Type | Width [min] | Area [pA*s] | Height [pA] | Area %   |
|--------|---------------|------|-------------|-------------|-------------|----------|
| 1      | 61.211        | MF   | 0.4992      | 2027.28235  | 67.69080    | 96.27991 |
| 2      | 62.933        | FM   | 0.3302      | 78.33067    | 3.95343     | 3.72009  |



crude reaction of 1e, (CDCl<sub>3</sub>, 600 MHz)

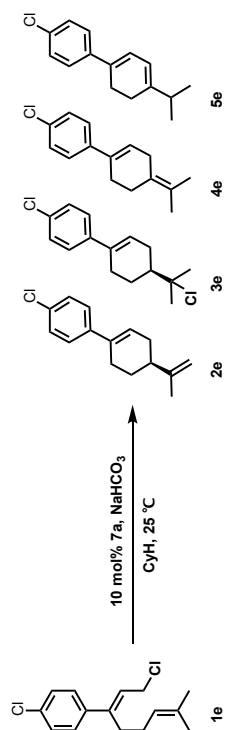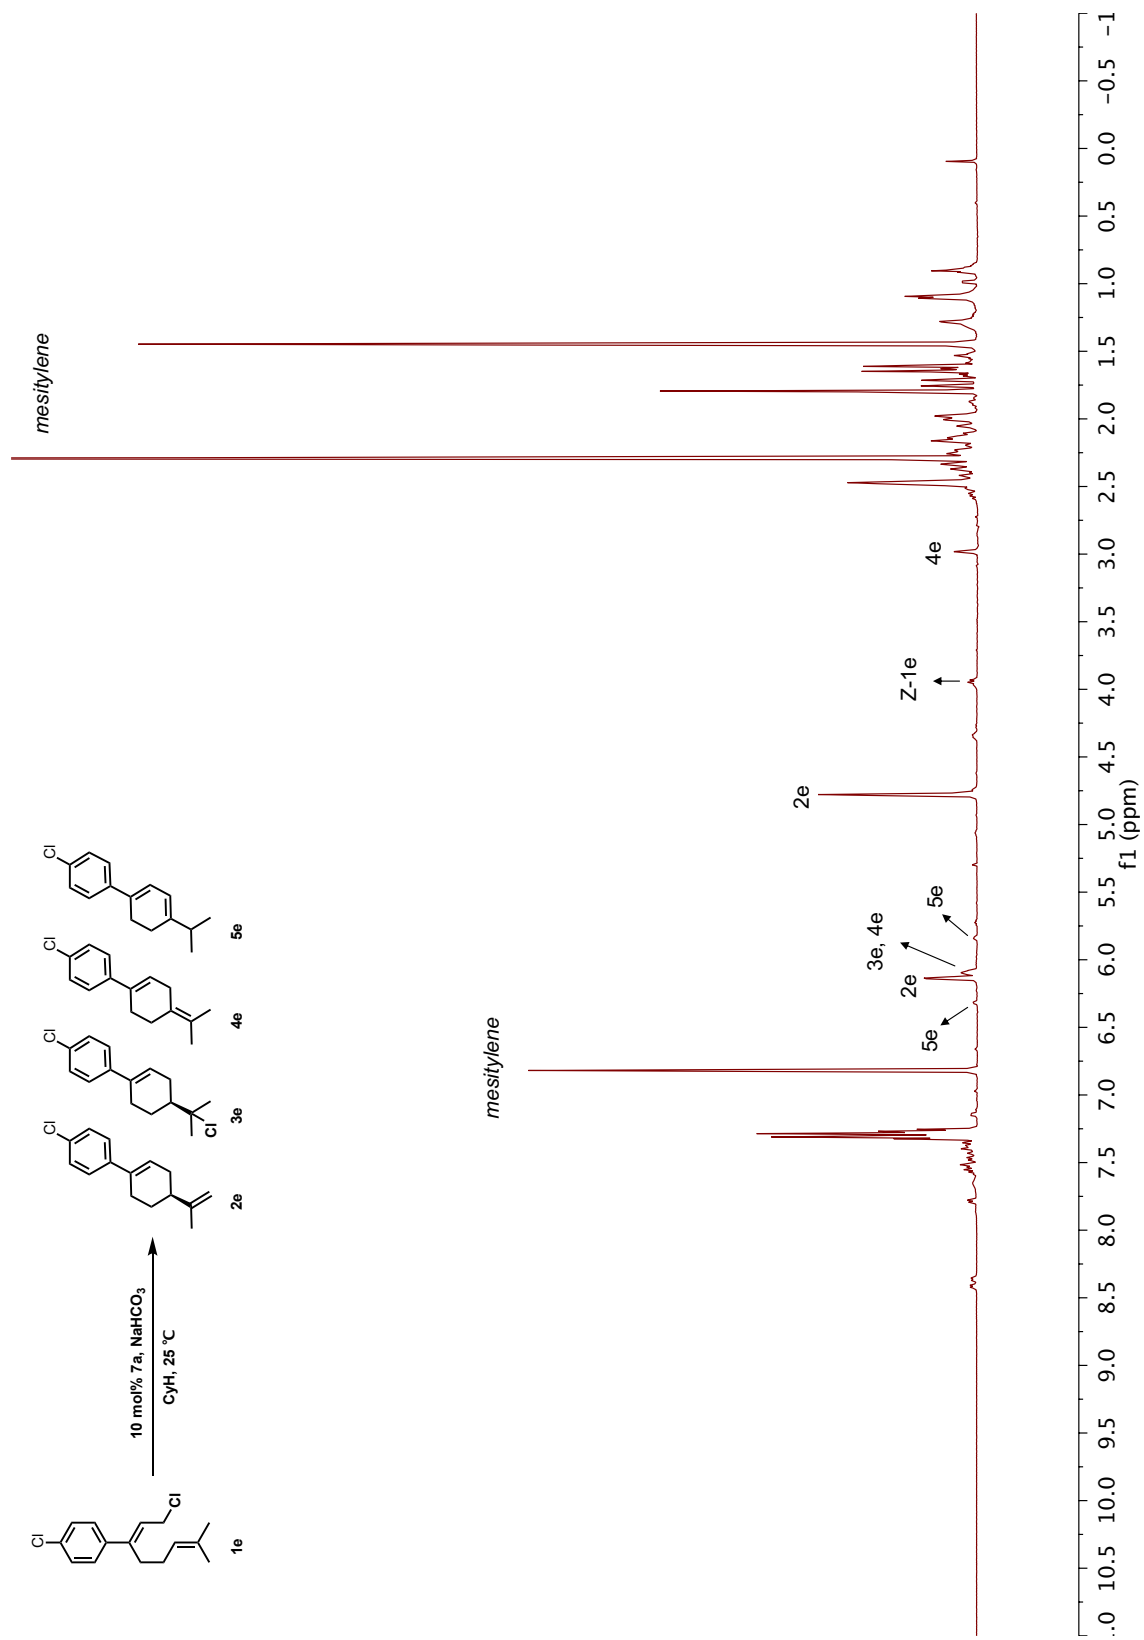

crude reaction of 1e, (CDCl<sub>3</sub>, 600 MHz)

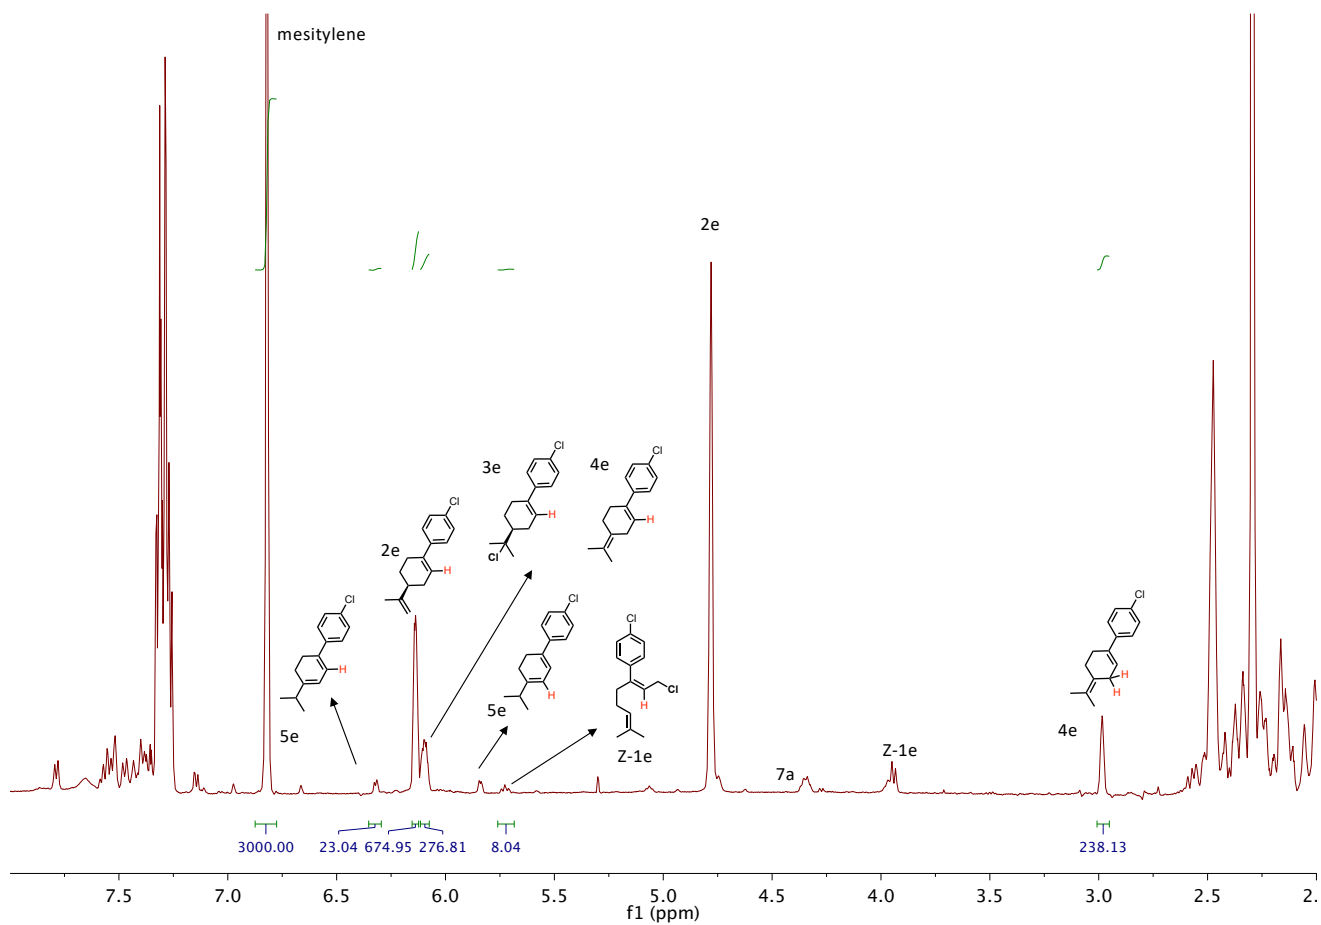

| Mesitylene (M) | 2e (M) | 3e (M) | 4e (M) | 5e (M) | Z-1e (M) | PDT       | Mass Balance |
|----------------|--------|--------|--------|--------|----------|-----------|--------------|
| 0.1            | 0.0675 | 0.0158 | 0.0119 | 0.0023 | 0.0008   | 0.0975    | 0.0983       |
| Sample         | 2e (%) | 3e (%) | 4e (%) | 5e (%) |          | Conv. (%) | Yield (%)    |
| 1e             | 68.04  | 15.93  | 12.00  | 2.32   |          | 100.00    | 98.29        |

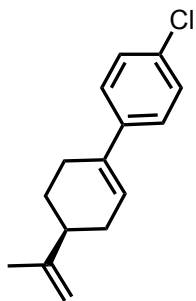

GC (cyclosil- $\beta$ , 30 m)  
 120 °C - 200 °C, 0.5 °C/min, 7 psi

*racemic sample*

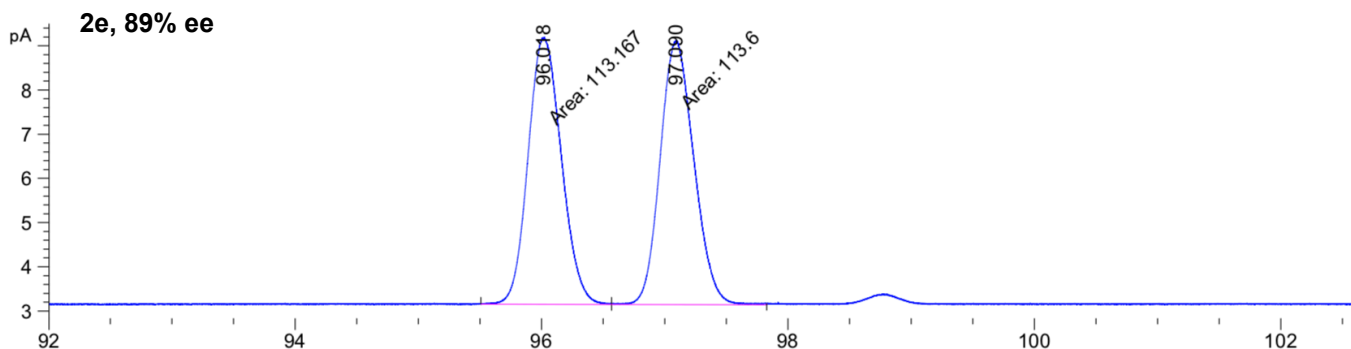

**2e, 89% ee**

| Peak # | RetTime [min] | Type | Width [min] | Area [pA*s] | Height [pA] | Area %   |
|--------|---------------|------|-------------|-------------|-------------|----------|
| 1      | 96.018        | MF   | 0.3126      | 113.16673   | 6.03448     | 49.90439 |
| 2      | 97.090        | FM   | 0.3163      | 113.60035   | 5.98659     | 50.09561 |

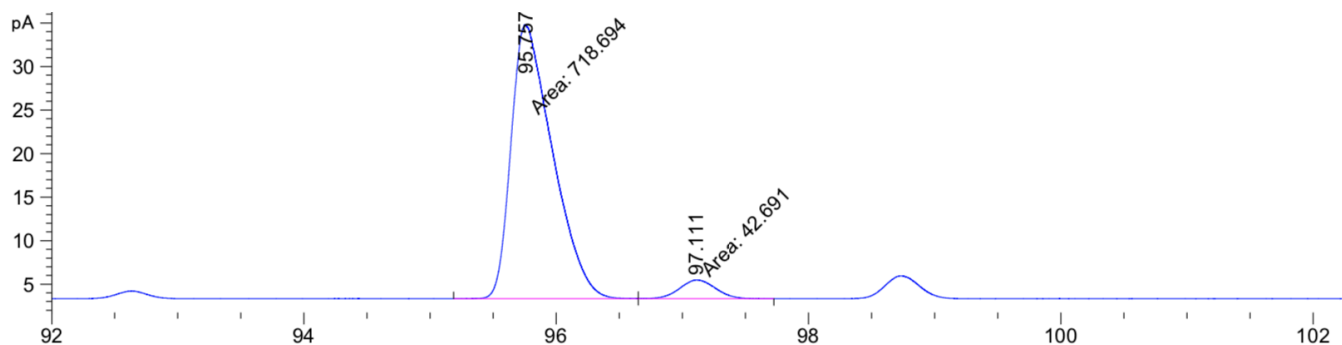

| Peak # | RetTime [min] | Type | Width [min] | Area [pA*s] | Height [pA] | Area %   |
|--------|---------------|------|-------------|-------------|-------------|----------|
| 1      | 95.757        | MM   | 0.3805      | 718.69391   | 31.48136    | 94.39298 |
| 2      | 97.111        | MM   | 0.3305      | 42.69099    | 2.15310     | 5.60702  |

crude reaction of 1f, (CDCl<sub>3</sub>, 600 MHz)

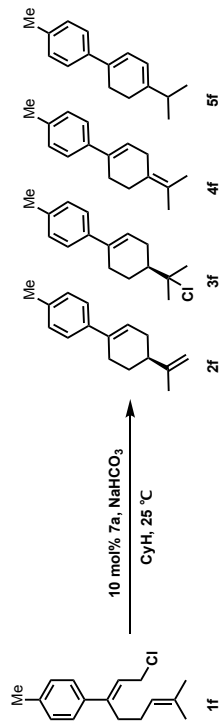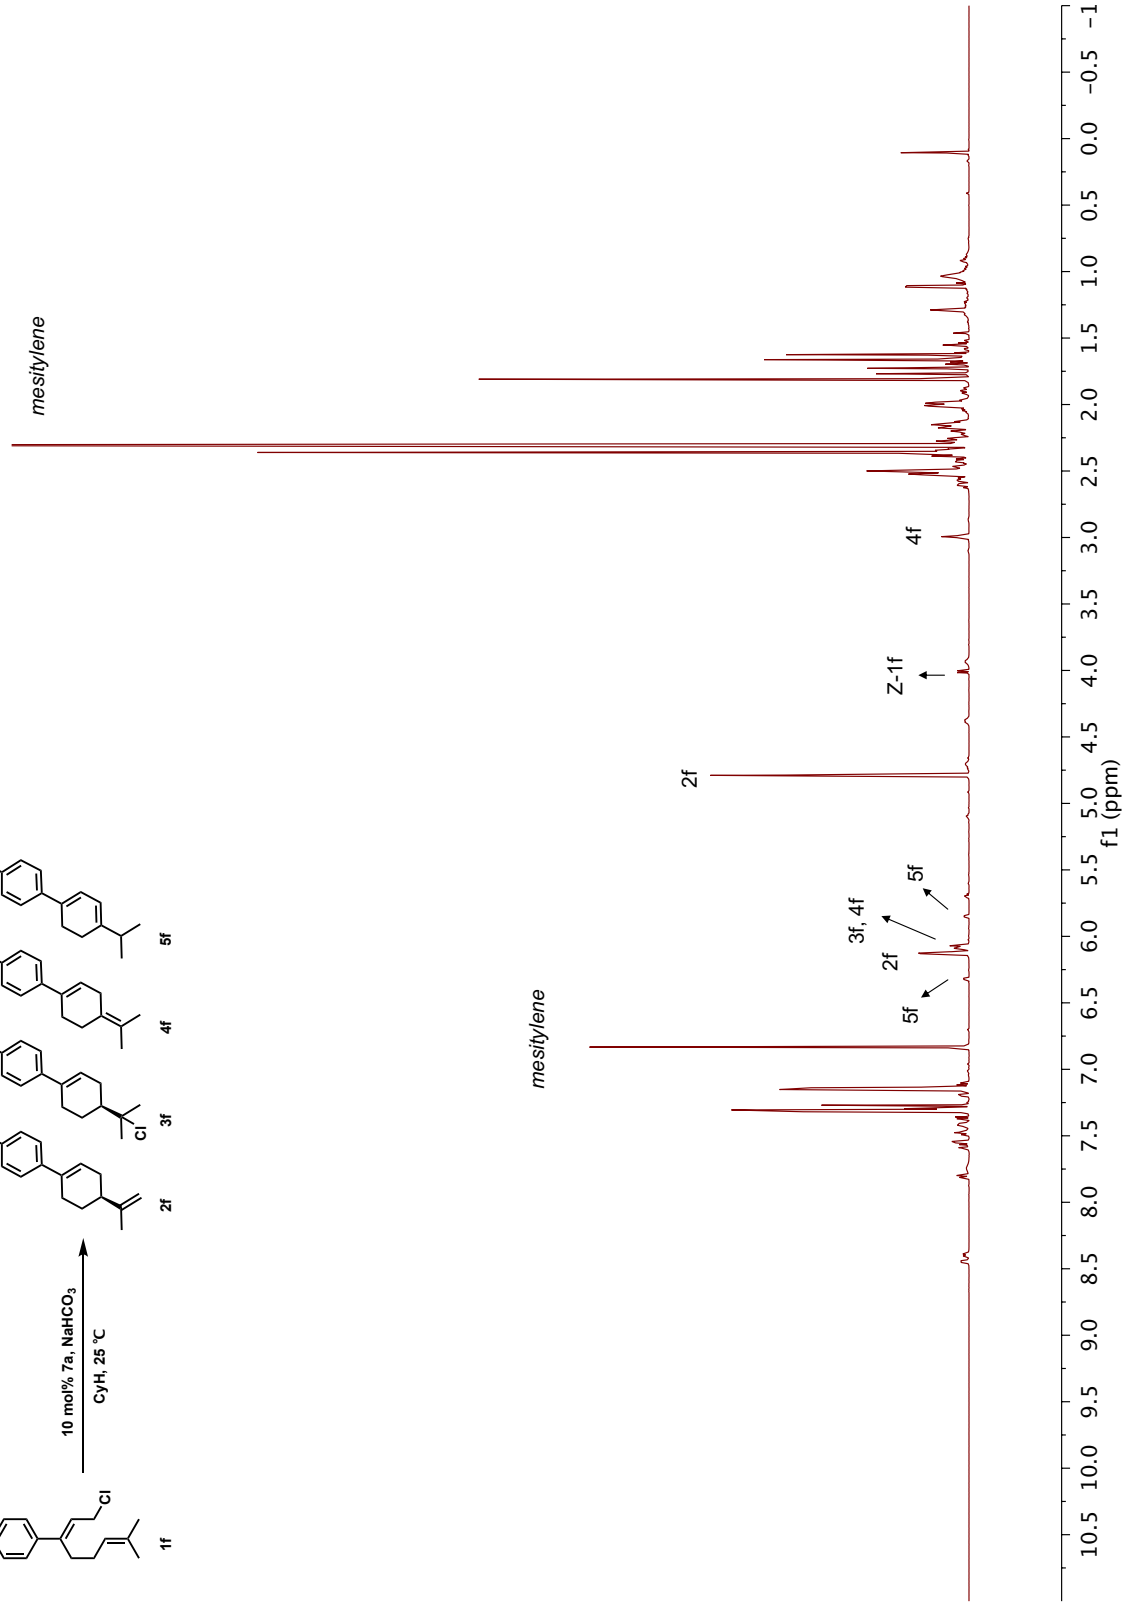

crude reaction of 1f, (CDCl<sub>3</sub>, 600 MHz)

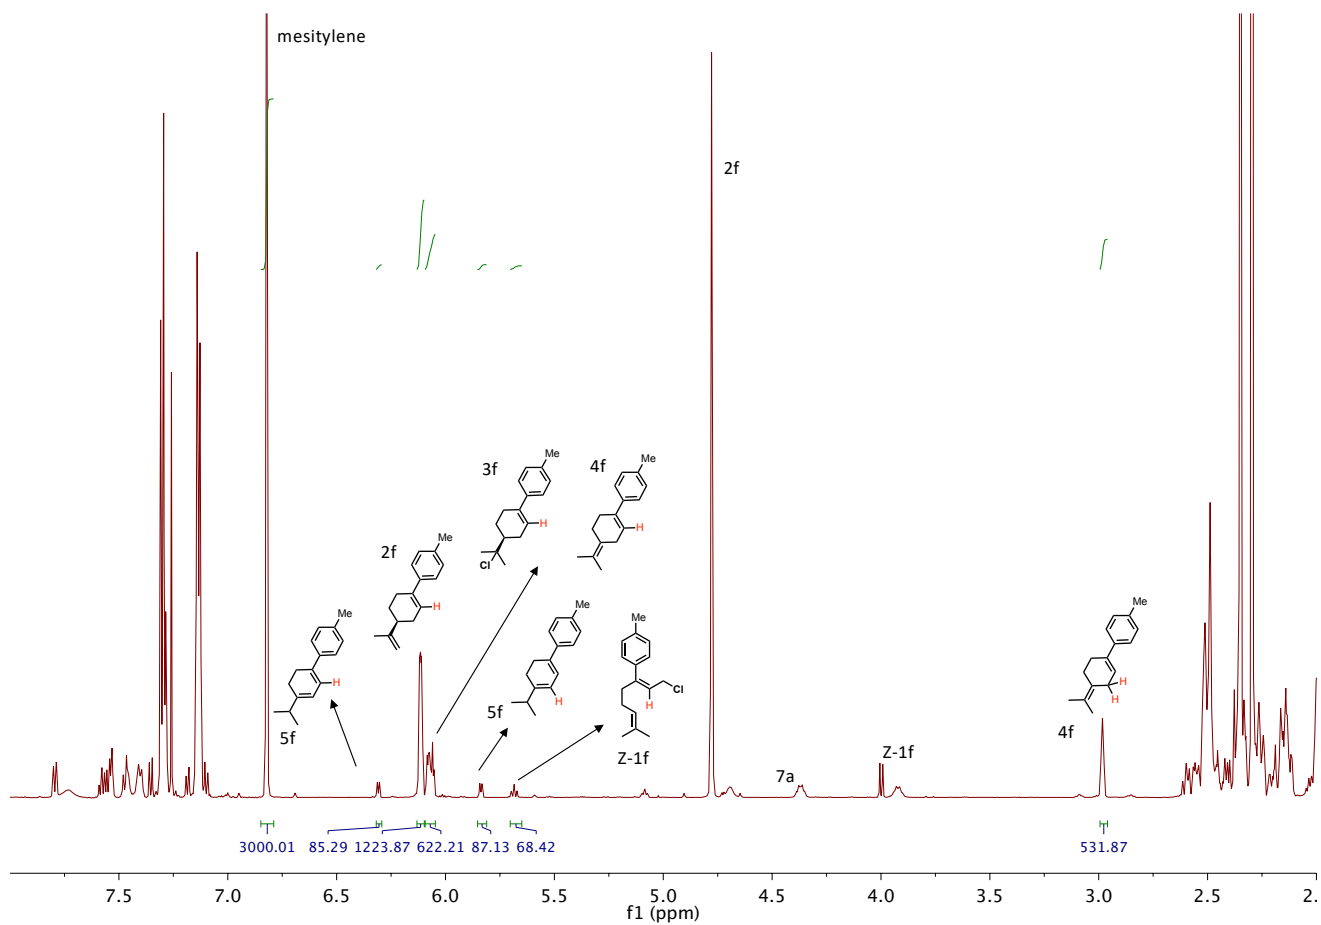

| Mesitylene (M) | 2f (M)      | 3f (M)     | 4f (M)     | 5f (M)     | Z-1f (M)    | PDT        | Mass Balance |
|----------------|-------------|------------|------------|------------|-------------|------------|--------------|
| 0.047606742    | 0.058270652 | 0.01635292 | 0.01325848 | 0.00414179 | 0.003237258 | 0.09202383 | 0.09526109   |
| Sample         | 2f (%)      | 3f (%)     | 4f (%)     | 5f (%)     |             | Conv. (%)  | Yield (%)    |
| 1f             | 60.22       | 16.90      | 13.70      | 4.28       |             | 100.00     | 95.10        |

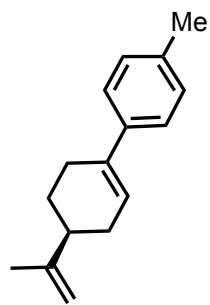

GC (cyclosil- $\beta$ , 30 m)  
120 °C - 200 °C, 0.5 °C/min, 7 psi

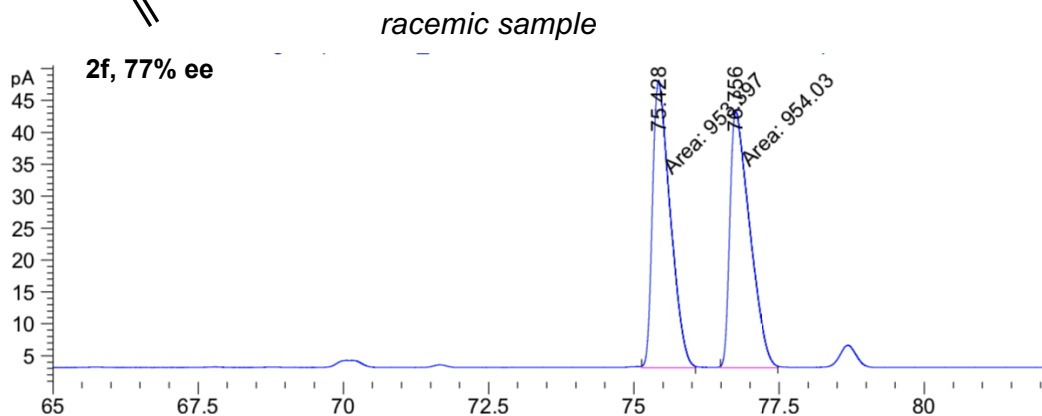

| Peak # | RetTime [min] | Type | Width [min] | Area [pA*s] | Height [pA] | Area %   |
|--------|---------------|------|-------------|-------------|-------------|----------|
| 1      | 75.428        | MM   | 0.3524      | 953.39685   | 45.08876    | 49.98341 |
| 2      | 76.756        | MM   | 0.3960      | 954.02991   | 40.14808    | 50.01659 |

*enantioenriched sample*

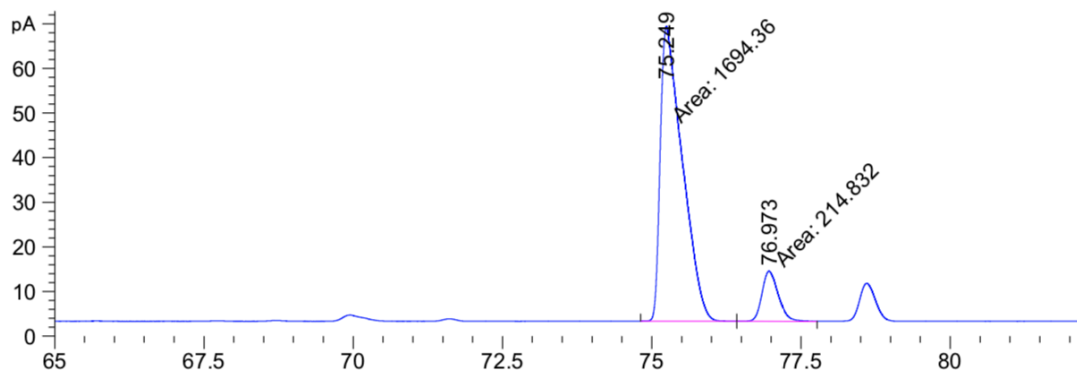

| Peak # | RetTime [min] | Type | Width [min] | Area [pA*s] | Height [pA] | Area %   |
|--------|---------------|------|-------------|-------------|-------------|----------|
| 1      | 75.249        | MF   | 0.4273      | 1694.35828  | 66.08471    | 88.74747 |
| 2      | 76.973        | FM   | 0.3172      | 214.83226   | 11.28682    | 11.25253 |

crude reaction of 1g, (CDCl<sub>3</sub>, 600 MHz)

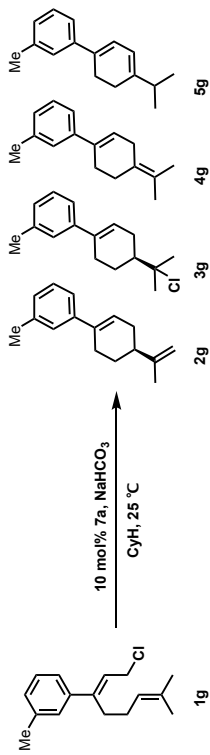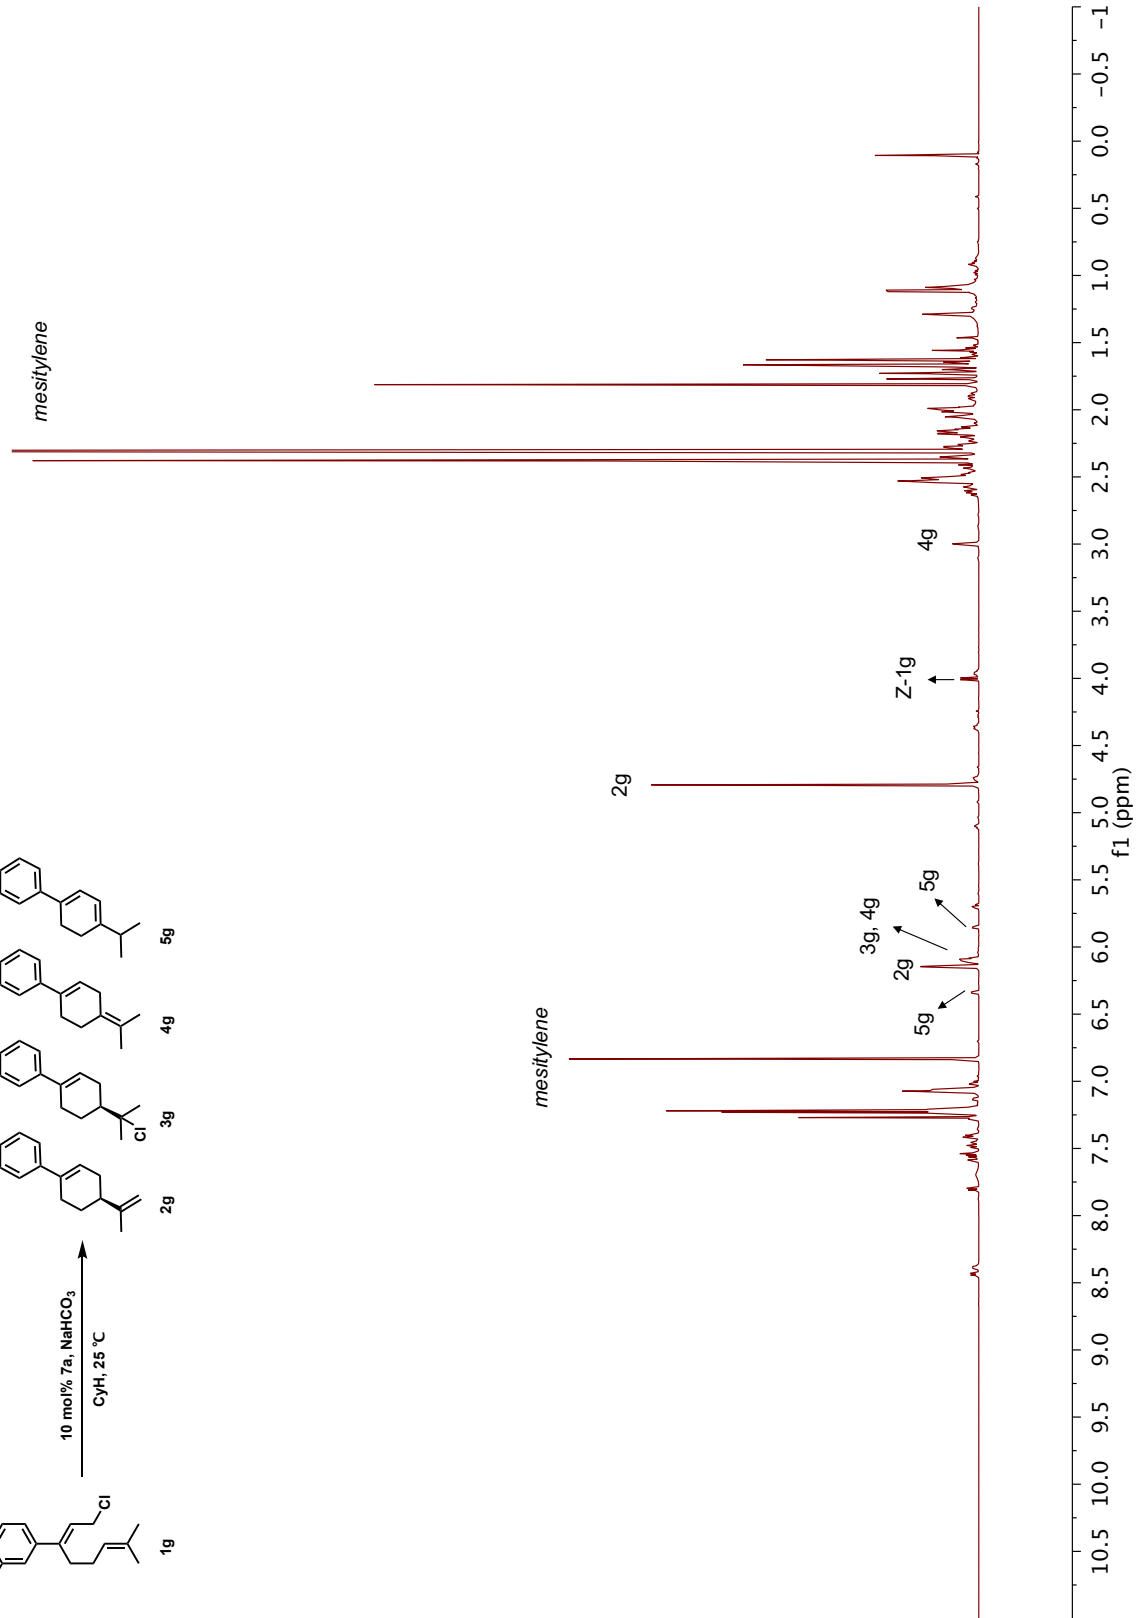

crude reaction of 1g, (CDCl<sub>3</sub>, 600 MHz)

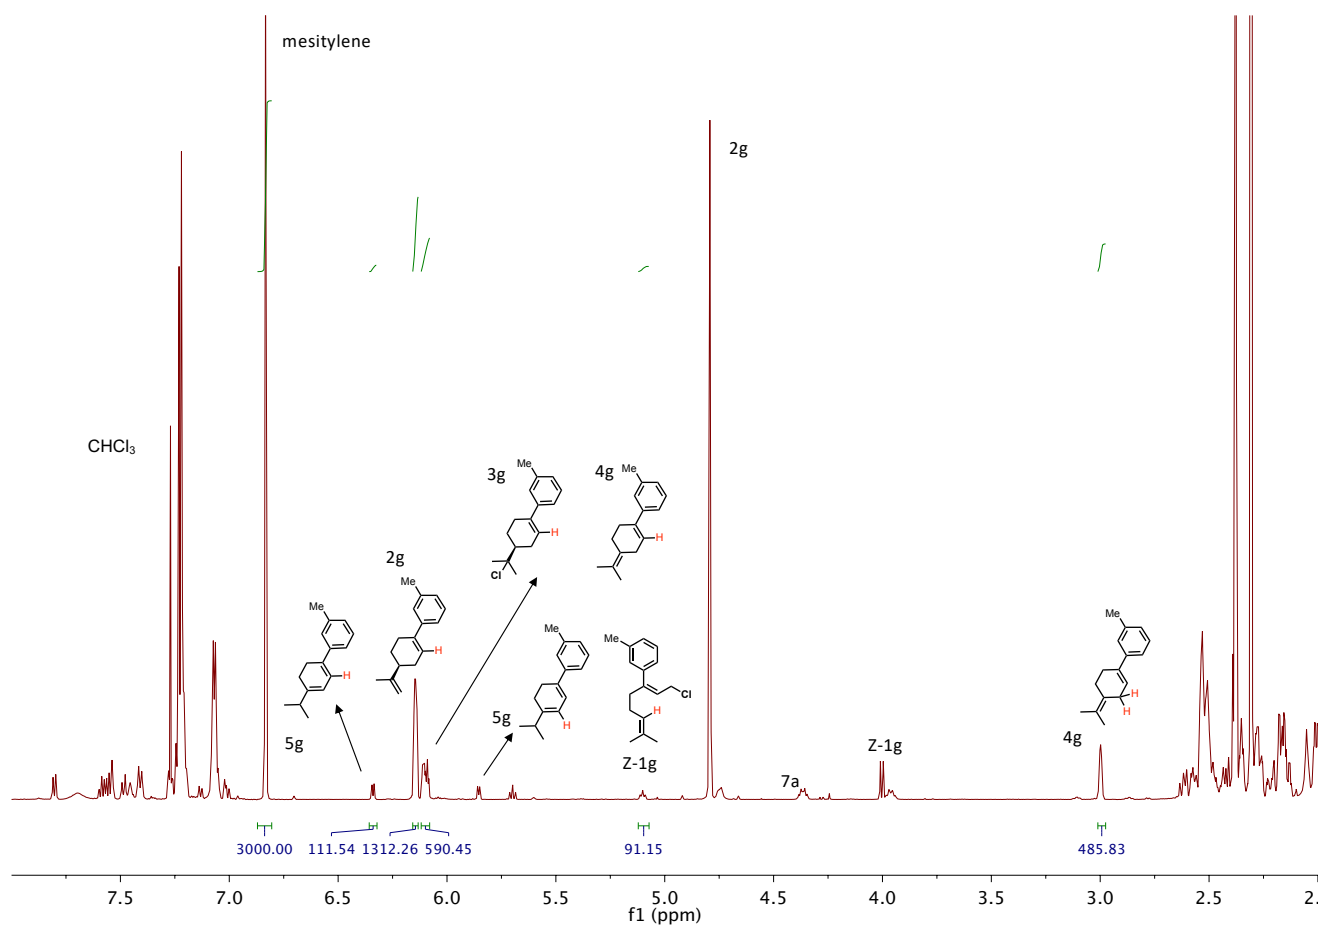

| Mesitylene (M) | 2g (M)      | 3g (M)     | 4g (M)     | 5g (M)     | Z-1g (M)    | PDT        | Mass Balance |
|----------------|-------------|------------|------------|------------|-------------|------------|--------------|
| 0.047606742    | 0.062460045 | 0.01651954 | 0.01156844 | 0.00528435 | 0.004332214 | 0.09583237 | 0.100164585  |
| Sample         | 2g (%)      | 3g (%)     | 4g (%)     | 5g (%)     |             | Conv. (%)  | Yield (%)    |
| 1g             | 65.29       | 17.27      | 12.09      | 5.52       |             | 100.00     | 100.17       |



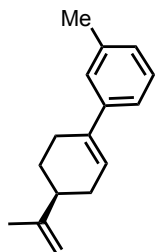

GC (cyclosil- $\beta$ , 30 m)  
 120 °C - 200 °C, 0.5 °C/min, 7 psi

2g, 91% ee

*racemic sample*

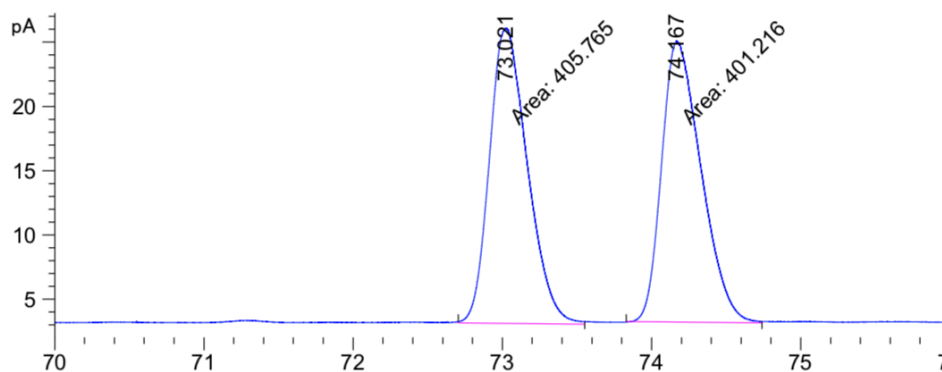

| Peak # | RetTime [min] | Type | Width [min] | Area [pA*s] | Height [pA] | Area %   |
|--------|---------------|------|-------------|-------------|-------------|----------|
| 1      | 73.021        | MM   | 0.2940      | 405.76456   | 22.99967    | 50.28182 |
| 2      | 74.167        | MM   | 0.3056      | 401.21613   | 21.88286    | 49.71818 |

*enantioenriched sample*

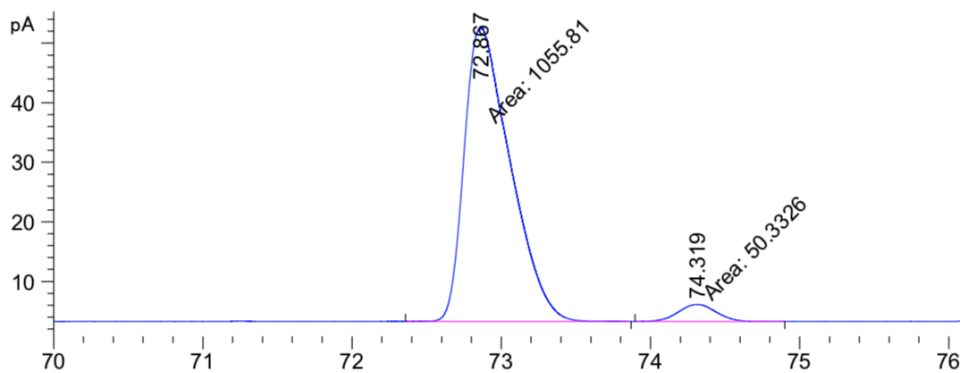

| Peak # | RetTime [min] | Type | Width [min] | Area [pA*s] | Height [pA] | Area %   |
|--------|---------------|------|-------------|-------------|-------------|----------|
| 1      | 72.867        | MM   | 0.3560      | 1055.81421  | 49.43515    | 95.44974 |
| 2      | 74.319        | MM   | 0.2923      | 50.33256    | 2.87015     | 4.55026  |

crude reaction of 1h, (CDCl<sub>3</sub>, 600 MHz)

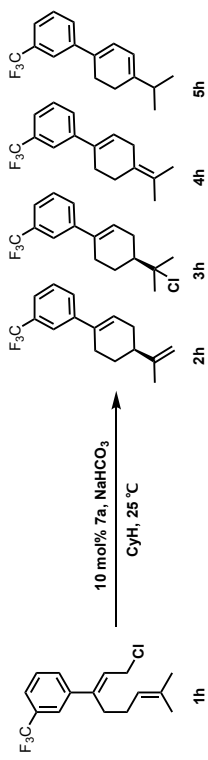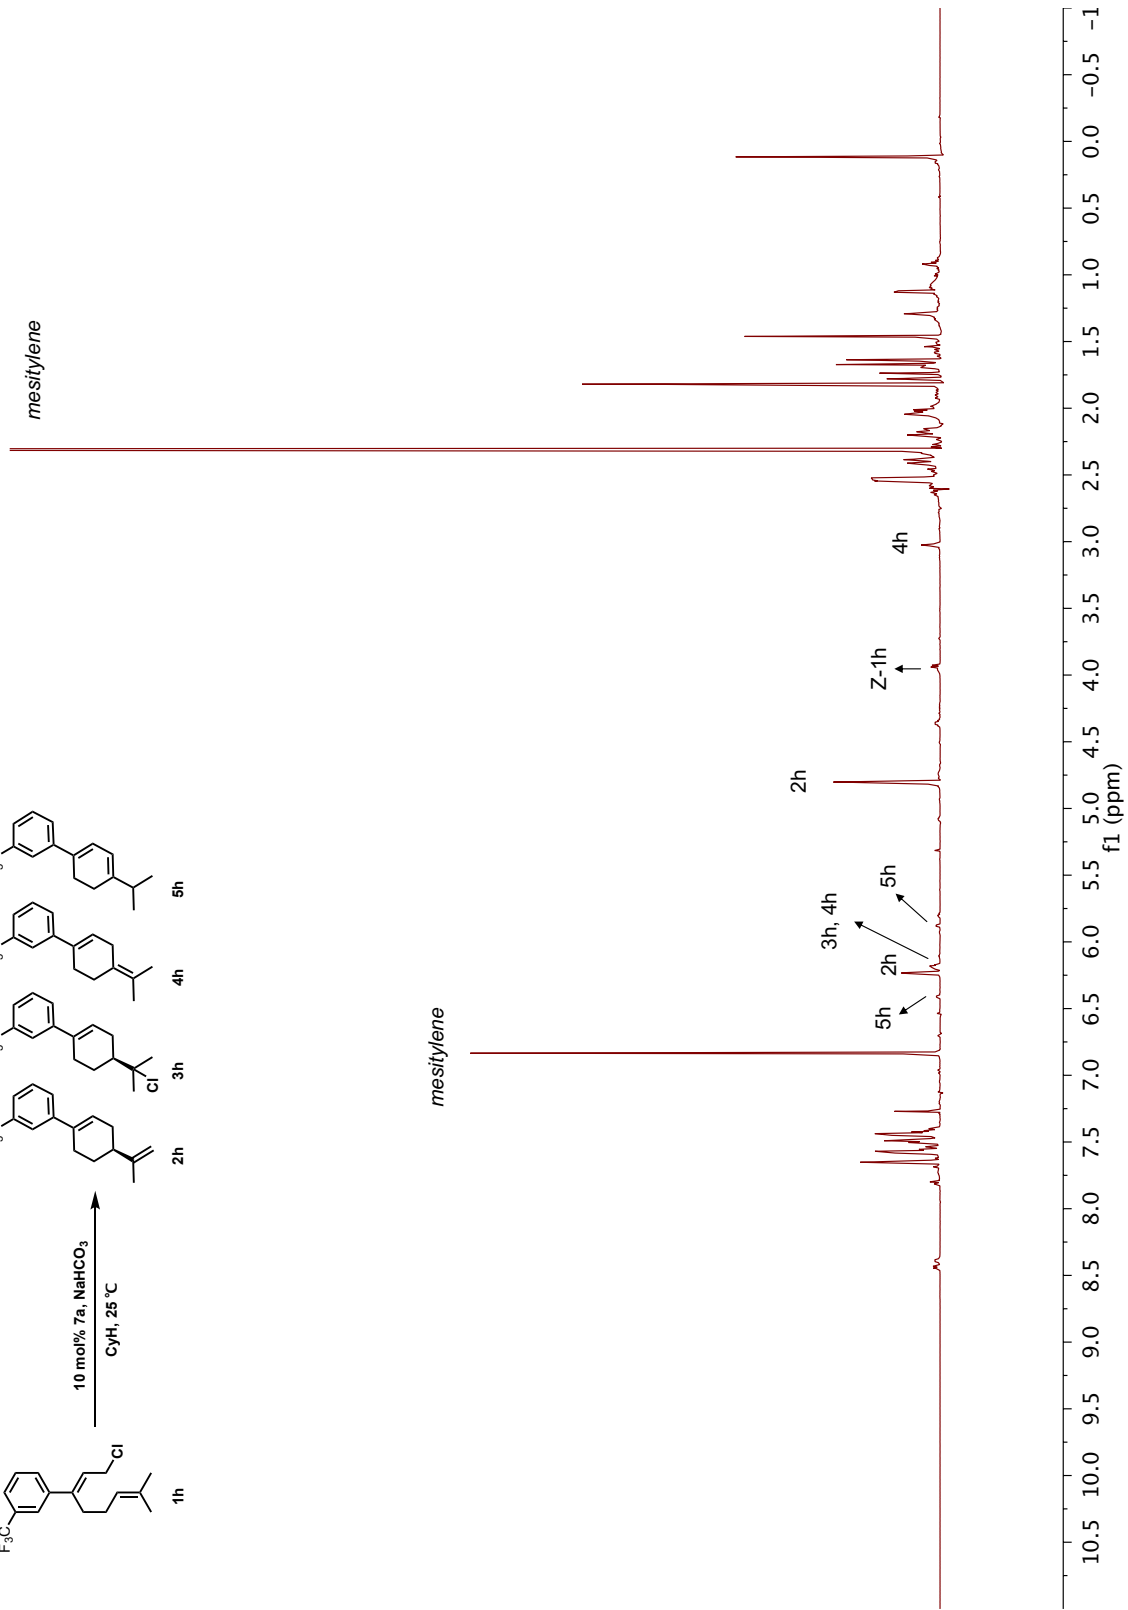

crude reaction of 1h, (CDCl<sub>3</sub>, 600 MHz)

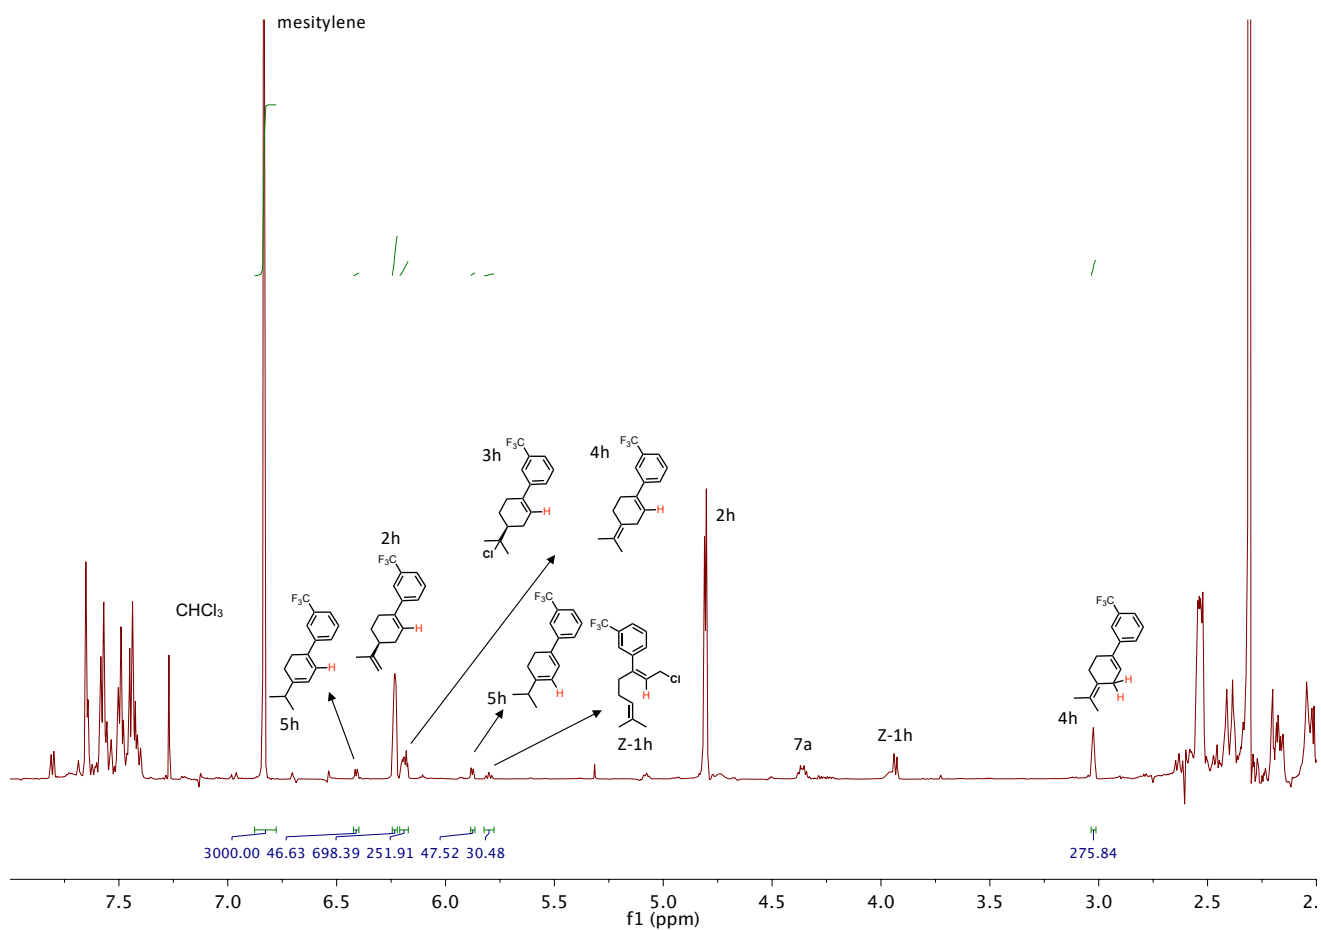

| Mesitylene (M) | 2h (M) | 3h (M) | 4h (M) | 5h (M) | Z-1h (M) | PDT       | Mass Balance |
|----------------|--------|--------|--------|--------|----------|-----------|--------------|
| 0.1            | 0.0698 | 0.0113 | 0.0138 | 0.0046 | 0.003    | 0.0995    | 0.1025       |
| Sample         | 2h (%) | 3h (%) | 4h (%) | 5h (%) |          | Conv. (%) | Yield (%)    |
| 1h             | 71.96  | 11.65  | 14.23  | 4.74   |          | 100.00    | 102.58       |

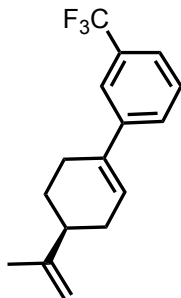

GC (cyclosil- $\beta$ , 30 m)  
 120 °C - 180 °C, 0.2 °C/min, 14 psi

*racemic sample*

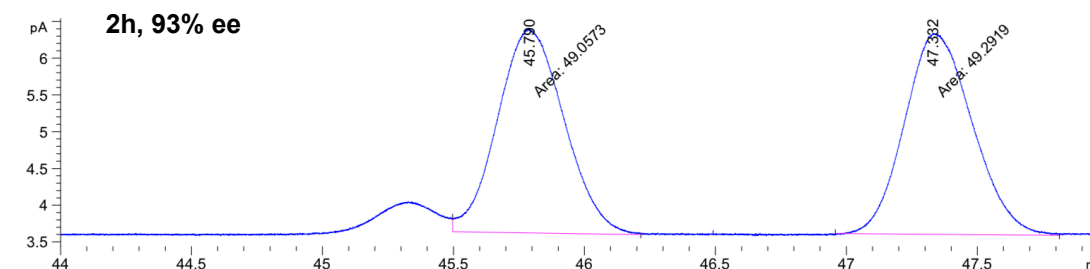

| Peak # | RetTime [min] | Type | Width [min] | Area [pA*s] | Height [pA] | Area %   |
|--------|---------------|------|-------------|-------------|-------------|----------|
| 1      | 45.790        | MM   | 0.2946      | 49.05734    | 2.77573     | 49.88074 |
| 2      | 47.332        | MM   | 0.3004      | 49.29193    | 2.73524     | 50.11926 |

*enantioenriched sample*

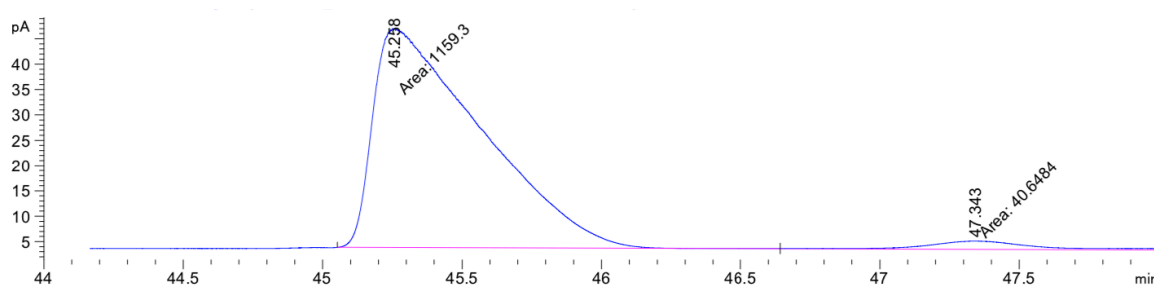

| Peak # | RetTime [min] | Type | Width [min] | Area [pA*s] | Height [pA] | Area %   |
|--------|---------------|------|-------------|-------------|-------------|----------|
| 1      | 45.258        | MF   | 0.4473      | 1159.29749  | 43.19694    | 96.61248 |
| 2      | 47.343        | FM   | 0.4203      | 40.64842    | 1.61187     | 3.38752  |

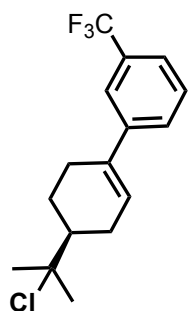

GC (cyclosil- $\beta$ , 30 m)  
 120 °C - 180 °C, 0.2 °C/min, 14 psi

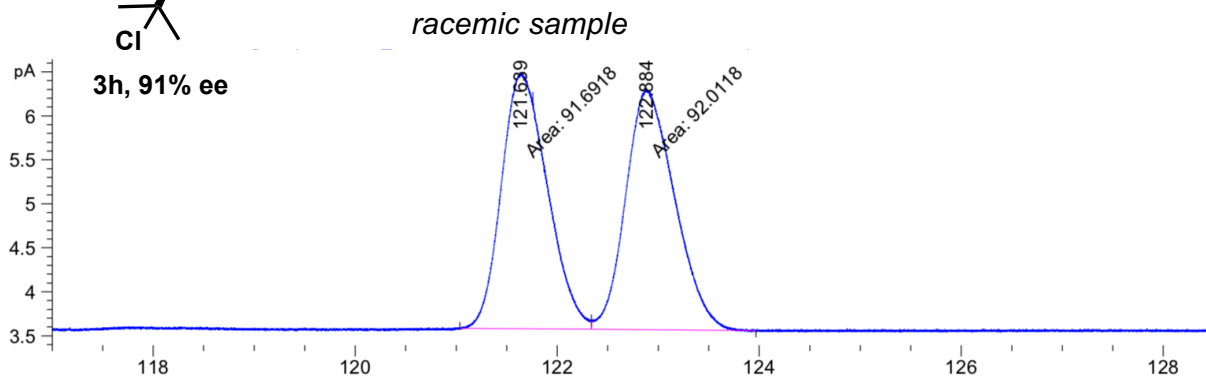

| Peak # | RetTime [min] | Type | Width [min] | Area [pA*s] | Height [pA] | Area %   |
|--------|---------------|------|-------------|-------------|-------------|----------|
| 1      | 121.639       | MF   | 0.5254      | 91.69181    | 2.90887     | 49.91289 |
| 2      | 122.884       | FM   | 0.5584      | 92.01185    | 2.74629     | 50.08711 |

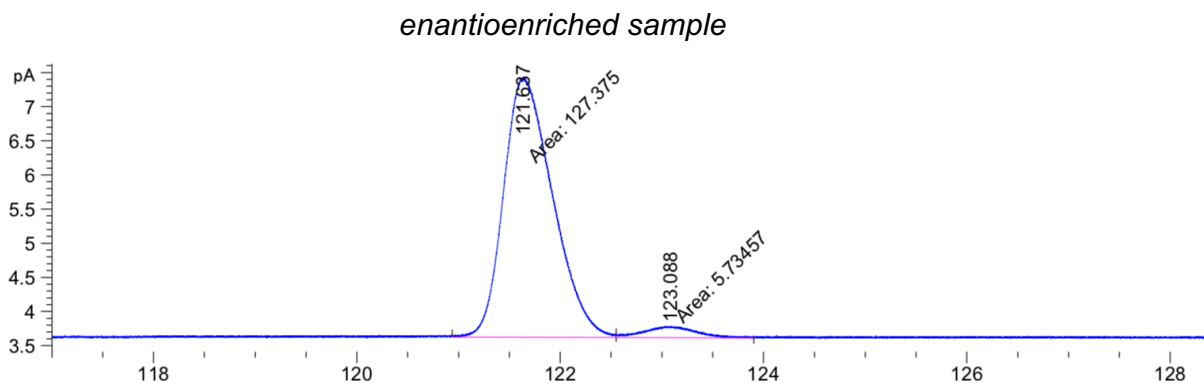

| Peak # | RetTime [min] | Type | Width [min] | Area [pA*s] | Height [pA] | Area %   |
|--------|---------------|------|-------------|-------------|-------------|----------|
| 1      | 121.637       | MF   | 0.5585      | 127.37526   | 3.80091     | 95.69185 |
| 2      | 123.088       | FM   | 0.5680      | 5.73457     | 1.68276e-1  | 4.30815  |

crude reaction of 1i, (CDCl<sub>3</sub>, 600 MHz)

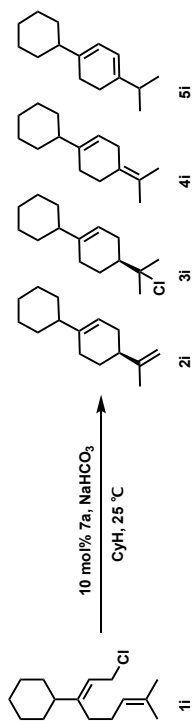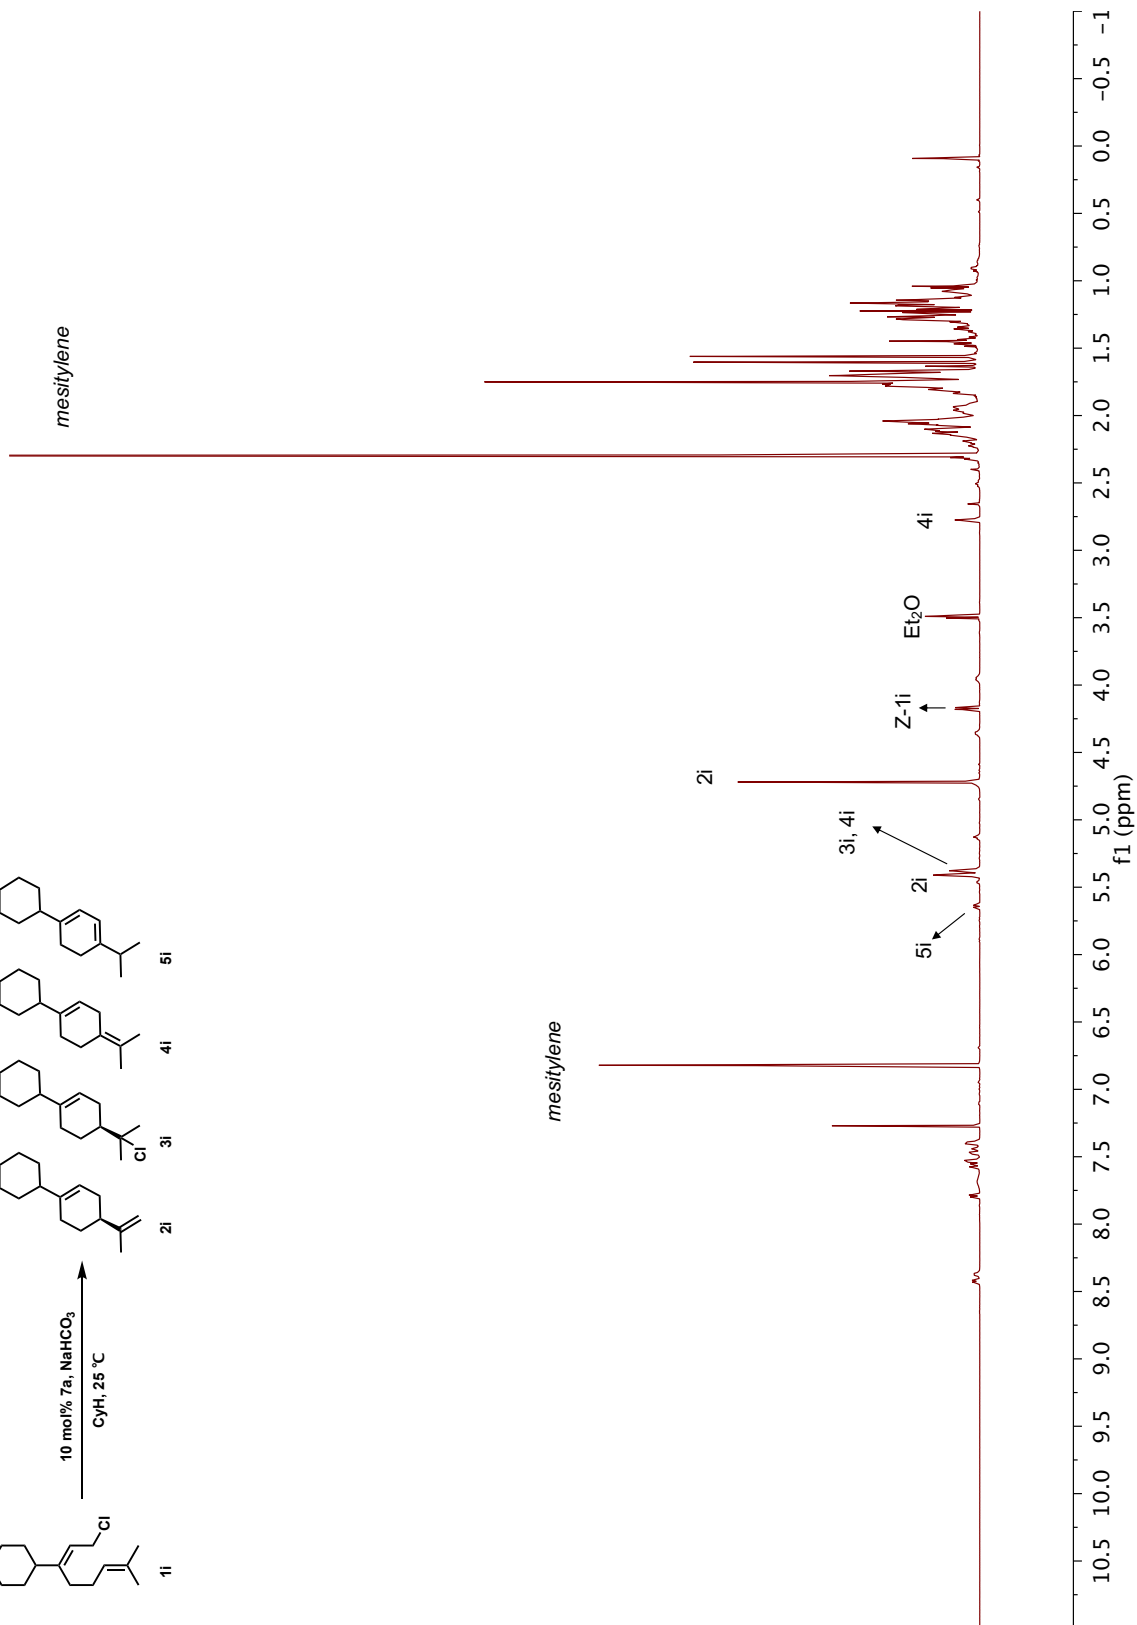

crude reaction of 1i, (CDCl<sub>3</sub>, 600 MHz)

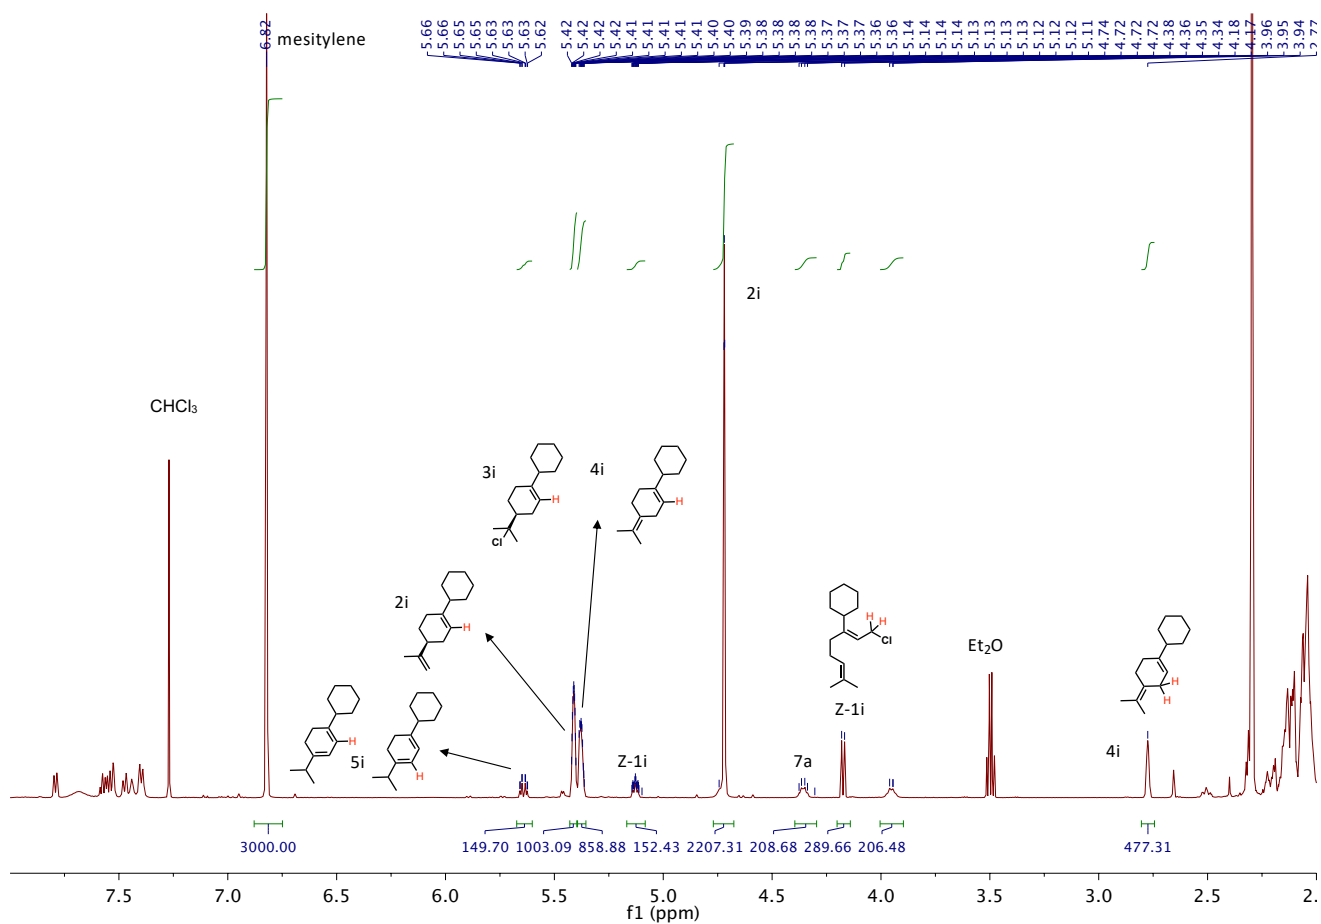

| Mes         | 2i (M)      | 3i (M)     | 4i (M)     | 5i (M)     | Z-1i (M)    | PDT        | Mass Balance |
|-------------|-------------|------------|------------|------------|-------------|------------|--------------|
| 0.047606742 | 0.047749562 | 0.02953998 | 0.01135421 | 0.00357051 | 0.006855371 | 0.09221426 | 0.09906963   |
| Sample      | 2i (%)      | 3i (%)     | 4i (%)     | 5i (%)     |             | Conv. (%)  | Yield (%)    |
| 1i          | 51.26       | 31.71      | 12.19      | 3.83       |             | 100.00     | 99.00        |

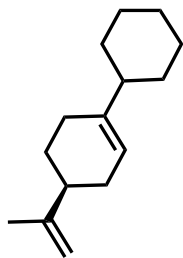

GC (cyclosil- $\beta$ , 30 m)  
120 °C - 200 °C, 0.5 °C/min, 7 psi

2i, 76% ee

*racemic sample*

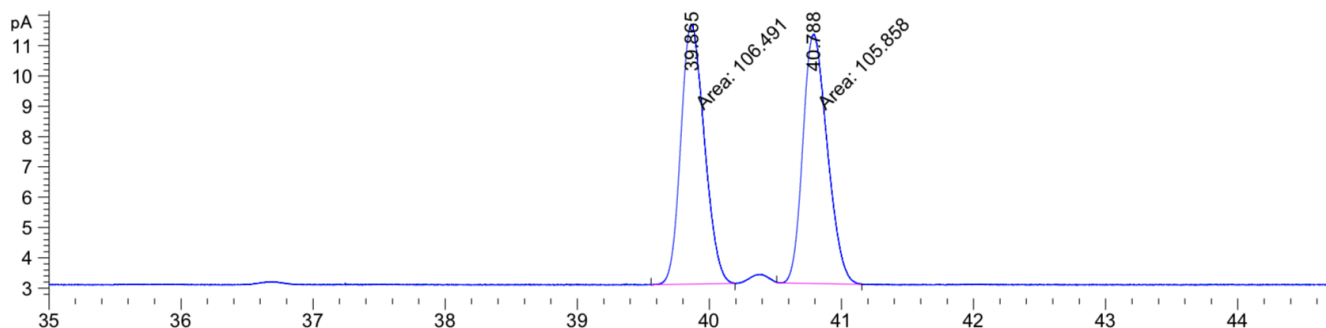

| Peak # | RetTime [min] | Type | Width [min] | Area [pA*s] | Height [pA] | Area %   |
|--------|---------------|------|-------------|-------------|-------------|----------|
| 1      | 39.865        | MM   | 0.2070      | 106.49110   | 8.57230     | 50.14896 |
| 2      | 40.788        | MM   | 0.2145      | 105.85844   | 8.22679     | 49.85104 |

*enantioenriched sample*

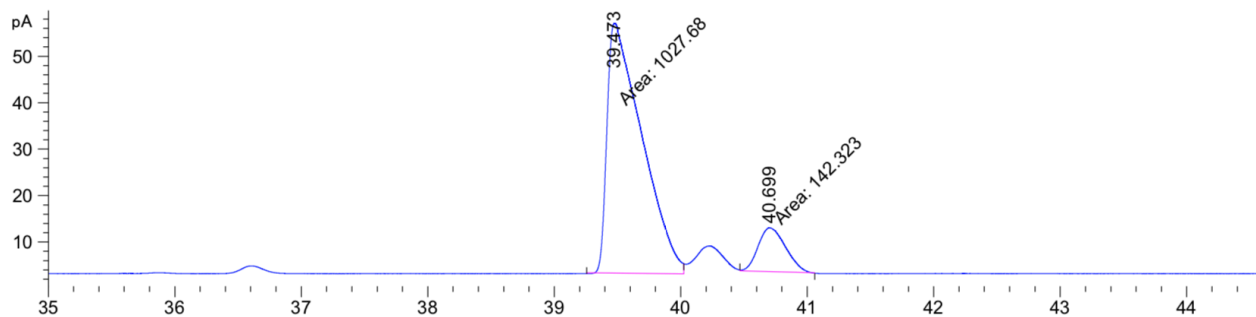

| Peak # | RetTime [min] | Type | Width [min] | Area [pA*s] | Height [pA] | Area %   |
|--------|---------------|------|-------------|-------------|-------------|----------|
| 1      | 39.473        | MM   | 0.3184      | 1027.68005  | 53.79232    | 87.83566 |
| 2      | 40.699        | MM   | 0.2515      | 142.32312   | 9.43091     | 12.16434 |



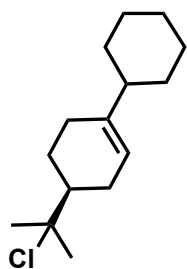

3i, 70% ee

GC (cyclosil- $\beta$ , 30 m)  
120 °C - 200 °C, 0.5 °C/min, 7 psi

*racemic sample*

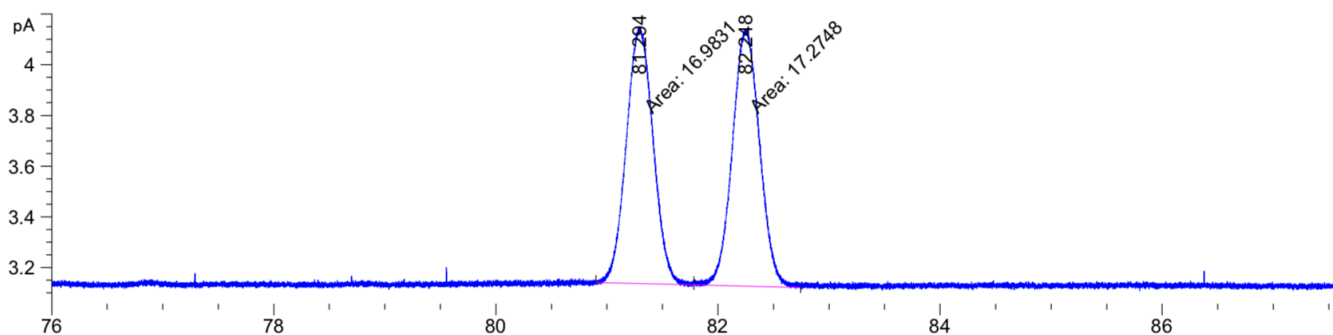

| Peak # | RetTime [min] | Type | Width [min] | Area [pA*s] | Height [pA] | Area %   |
|--------|---------------|------|-------------|-------------|-------------|----------|
| 1      | 81.294        | MF   | 0.2819      | 16.98306    | 1.00422     | 49.57426 |
| 2      | 82.248        | FM   | 0.2848      | 17.27476    | 1.01092     | 50.42574 |

*enantioenriched sample*

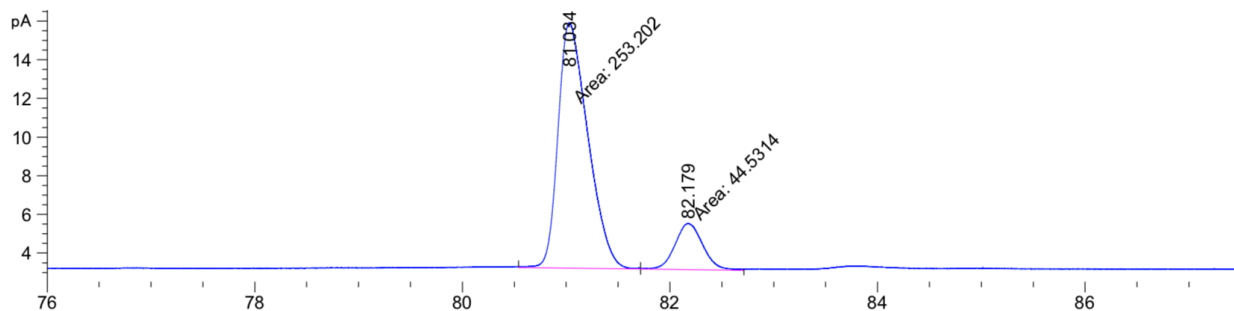

| Peak # | RetTime [min] | Type | Width [min] | Area [pA*s] | Height [pA] | Area %   |
|--------|---------------|------|-------------|-------------|-------------|----------|
| 1      | 81.034        | MF   | 0.3325      | 253.20250   | 12.69217    | 85.04322 |
| 2      | 82.179        | FM   | 0.3099      | 44.53142    | 2.39520     | 14.95678 |

### 6.3 Isolation and characterization of compounds 2b-5b

Hydrogen bond donor catalyst **7a** (0.015 mmol, 0.0094 g, 10 mol%) and sodium bicarbonate (0.23 mmol, 0.019 g, 1.5 eq.) were weighed directly into a flame-dried 1 dram vial charged with a magnetic stir bar. Then, 500  $\mu$ L of anhydrous cyclohexane (CyH) were added, followed by 1 mL of a 0.15 M stock solution of substrate **1b** (0.15 mmol) in CyH. The reaction vial was capped and sealed with electrical tape, and was allowed to stir for 24 hr. After this point, the crude reaction was passed through a short plug of silica gel eluting with hexanes. The sample was concentrated in concentrated *in vacuo* and a mass of isolated product (combined mass of **2b-5b**) was recorded (0.0305 g, 98% yield).  $^1\text{H}$  NMR analysis concluded that the sample consisted only of products **2b-5b** and a small amount (< 5%) of unreactive **Z-1b**. This material was subjected to flash column chromatography eluting with hexanes to separate product **3b** from alkene products **2b**, **4b**, and **5b**. **2b** was separated from **4b** and **5b** using commercially-available silver nitrate on silica gel (~10 wt. %, 230 mesh) eluting with 10% toluene in hexanes (v/v). Compounds **4b** and **5b** could not be separated from one another using any form of column chromatography surveyed; their structures were assigned based on comparison of NMR spectra to authentic samples of terpinolene and  $\alpha$ -terpinene respectively as well as with data in the literature.<sup>6</sup>

#### (S)-4-(prop-1-en-2-yl)-2,3,4,5-tetrahydro-1,1'-biphenyl (2b)

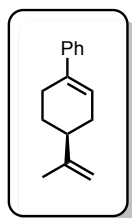

isolated as a clear colorless oil; 87% ee

$^1\text{H}$  NMR: (500 MHz,  $\text{CDCl}_3$ )  $\delta$  7.40 (m, 2H), 7.32 (t,  $J = 7.6$  Hz, 2H), 7.23 (m, 1H), 6.15 (m, 1H), 4.78 (s, 2H), 2.52 (tdd,  $J = 8.5, 4.2, 2.4$  Hz, 2H), 2.30 (m, 2H), 2.15 (ddt,  $J = 17.2, 10.4, 3.2$  Hz, 1H), 2.00 (dp,  $J = 12.6, 2.3$  Hz, 1H), 1.80 (d,  $J = 1.2$  Hz, 3H), 1.64 (tdd,  $J = 12.4, 10.7, 6.5$  Hz, 1H)

$^{13}\text{C}$  NMR: (126 MHz,  $\text{CDCl}_3$ )  $\delta$  149.8, 142.1, 136.2, 128.2, 126.6, 125.0, 124.1, 108.7, 40.7, 31.3, 27.9, 27.8, 20.8

HR-MS (EI): calcd. for  $\text{C}_{15}\text{H}_{18}$  198.1403 [ $\text{M}^+$ ], found 198.1396

$[\alpha]_D^{22} = -8.6$  (c=1.0,  $\text{CDCl}_3$ )

#### (S)-4-(2-chloropropan-2-yl)-2,3,4,5-tetrahydro-1,1'-biphenyl (3b)

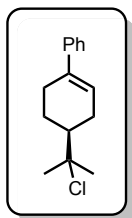

isolated as a white solid; 86% ee

$^1\text{H}$  NMR: (500 MHz,  $\text{CDCl}_3$ )  $\delta$  7.39 (d,  $J = 7.4$  Hz, 2H), 7.32 (dd,  $J = 8.4, 6.8$  Hz, 2H), 7.24 (m, 1H), 6.12 (dt,  $J = 5.0, 2.3$  Hz, 1H), 2.59 (m, 1H), 2.48 (dddt,  $J = 30.6, 17.9, 5.5, 2.7$  Hz, 2H), 2.19 (dddd,  $J = 24.6, 15.3, 4.7, 2.2$  Hz, 2H), 1.89 (tdd,  $J = 11.5, 5.1, 2.5$  Hz, 1H), 1.65 (s, 3H), 1.61 (s, 3H), 1.55 (m, 1H)

$^{13}\text{C}$  NMR: (126 MHz,  $\text{CDCl}_3$ )  $\delta$  141.8, 136.5, 128.2, 126.7, 125.0, 123.5, 74.3, 46.2, 30.7, 29.9, 28.3, 28.1, 24.9

HR-MS (EI): calcd. for  $\text{C}_{15}\text{H}_{19}\text{Cl}$  234.1170 [ $\text{M}^+$ ], found 234.1166

$[\alpha]_D^{22} = -80.0$  (c=1.0,  $\text{CDCl}_3$ )

#### 4-(propan-2-ylidene)-2,3,4,5-tetrahydro-1,1'-biphenyl and 4-isopropyl-2,3-dihydro-1,1'-biphenyl (4b and 5b)

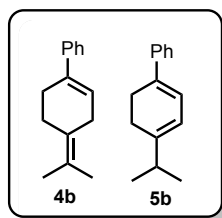

isolated as a clear oil

$^1\text{H}$  NMR (**4b**): (600 MHz,  $\text{CDCl}_3$ )  $\delta$  7.39 (dt,  $J = 8.2, 1.4$  Hz, 2H), 7.31 (td,  $J = 7.7, 1.4$  Hz, 2H), 7.22 (m, 1H), 6.10 (tt,  $J = 4.1, 1.4$  Hz, 1H), 2.99 (s, 2H), 2.50 (s, 4H), 1.75 (s, 3H), 1.71 (s, 3H)  $^1\text{H}$  NMR (**5b**): (600 MHz,  $\text{CDCl}_3$ )  $\delta$  7.45 (dt,  $J = 8.1, 1.4$  Hz, 2H), 6.34 (dd,  $J = 5.8, 1.4$  Hz, 1H), 5.85 (dt,  $J = 6.0, 1.5$  Hz, 1H), 2.40 (spt,  $J = 6.9$  Hz, 1H), 2.29 (m, 4H), 1.10 (s, 3H), 1.09 (s, 3H)

$^{13}\text{C}$  NMR (**4b**): (126 MHz,  $\text{CDCl}_3$ )  $\delta$  142.23, 136.98, 128.17, 126.89, 126.49, 124.97, 124.26, 122.24, 30.07, 28.82, 26.77, 20.21, 19.78.  $^{13}\text{C}$  NMR (**5b**): (126 MHz,  $\text{CDCl}_3$ )  $\delta$  142.23, 136.98, 128.30, 128.22, 124.73, 124.26, 29.70, 28.09, 25.63, 21.24, 21.12

HR-MS (EI): calcd. for  $\text{C}_{15}\text{H}_{18}$  198.1403 [ $\text{M}^+$ ], found 198.1398

## 6.4 Elimination of **3b**

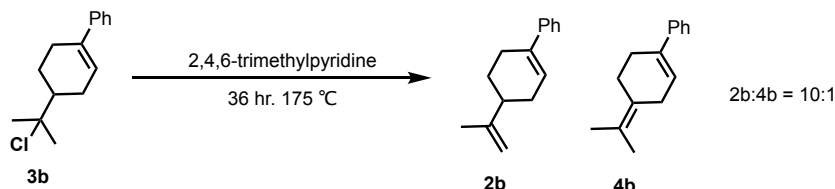

A flame-dried 1-dram vial containing a magnetic stir bar was charged with **3b** (0.043 mmol, 0.010 g) and subsequently evacuated and backfilled with nitrogen gas. Then, 430  $\mu\text{L}$  of 2,4,6-trimethylpyridine (collidine) were added and the mixture was heated to 175 °C for 36 hours. After this point, TLC analysis indicated full consumption of **3b** and the reaction was passed through a short pad of silica gel eluting with 100% hexanes to provide products **2b** and **4b** in a 10:1 ratio (determined by  $^1\text{H}$  NMR analysis) in 83% combined yield (0.0071g).

## 6.5 Cyclization reaction with **Z-1b**

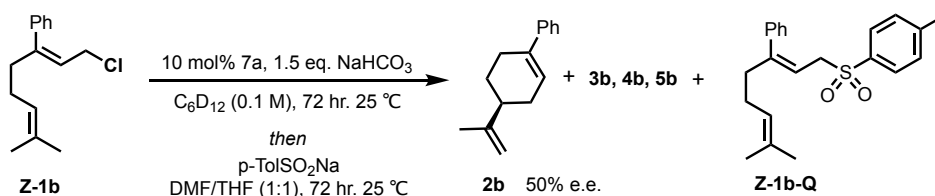

Hydrogen bond donor catalyst **7a** (0.0075 mmol, 0.0047 g, 10 mol%) and sodium bicarbonate (0.113 mmol, 0.0095 g, 1.5 eq.) were weighed directly into a flame-dried 1 dram vial charged with a magnetic stir bar. Then, 250  $\mu\text{L}$  of d12-cyclohexane were added, followed by 500  $\mu\text{L}$  of a 0.15 M stock solution of substrate **Z-1b** in d12-cyclohexane and 5  $\mu\text{L}$  of mesitylene internal standard. The reaction vial was capped and sealed with electrical tape. The reaction mixture was allowed to stir for 72 hours. After this time, 600  $\mu\text{L}$  of the crude reaction were transferred to a flame-dried NMR tube for analysis by  $^1\text{H}$  NMR. Conversion of **Z-1b** was determined using the mesitylene aromatic CH frequency (6.7 ppm) by  $^1\text{H}$  NMR. Enantiomeric excess for product **2b** was determined using an Agilent 7890A series GC system outfitted with a commercially available cyclosil- $\beta$  30m column. **Z-1b** was found to undergo cyclization to form products **2-5b** using these GC conditions; hence, following  $^1\text{H}$  NMR analysis of the crude reaction, the reaction was concentrated, taken in a mixture of THF (375  $\mu\text{L}$ ) and DMF (375  $\mu\text{L}$ ) and subjected to treatment with sodium p-toluenesulfinate (0.075 mmol, 0.113 g, 10 eq.) for 72 hr. to quench unreacted **Z-1b** (see section 8) prior to evaluation of e.e. of **2b**. After this time, NMR analysis revealed complete conversion of remaining **Z-1b** to the sulfone product, **Z-1b-Q**. No additional conversion to products **2-5b** or any other products were observed using these quench conditions and **Z-1b-Q** did not cyclize on the CG.

Note that **Z-1b** was synthesized (see section 3) as a 30:1 ratio of **Z-1b** to **1b** (3.2% **1b** impurity). **Z-1b** and **1b** are inseparable by conventional column chromatography and both cyclize on silica to form products **2-5b**. Upon analysis of the reaction aliquot by  $^1\text{H}$  NMR, no remaining **1b** was observed. The e.e. value for the cyclization of **Z-1b** was determined on the assumption that the small amount (3.2%) of **1b** present reacted to form **2b** in 87% e.e. (e.r. = 14.21:1) with the same product distribution as reported in section 6.2. The reaction of **Z-1b** proceeded to 9.6% conversion (with full conversion of **1b**, total conversion = 12.8%) and produced a total yield of **2b** of 7.24%. The measured e.e. value for product **2b** was 60% (e.r. = 4.0:1). Using the observed product distribution of pure **1b** (section 6.2), of the 7.24% yield of **2b** observed in this experiment, 2.03% comes from the reaction of **1b**. The remaining 5.21% comes from the cyclization of **Z-1b**.

Let  $R_{1b}$  and  $R_Z$  be the yields of the R enantiomers of substrates **1b** and **Z-1b** respectively. Let  $S_{1b}$  and  $S_Z$  be the yields of the S enantiomers of substrates **1b** and **Z-1b** respectively. Assuming R is the major enantiomer,

$$er_{obs} = \frac{R_{1b} + R_Z}{S_{1b} + S_Z} \quad (eq. 1)$$

$$R_{1b} + S_{1b} = 2.03\% \text{ yield}$$

$$\frac{R_{1b}}{S_{1b}} = er_{1b} = 14.21$$

hence,

$$R_{1b} = 1.90\% \text{ yield}; S_{1b} = 0.13\% \text{ yield}$$

$$R_Z + S_Z = 5.21\% \text{ yield}$$

$$\frac{R_Z}{S_Z} = er_Z$$

$$S_Z er_Z + S_Z = 5.21\% \text{ yield}$$

$$S_Z = \frac{5.21\% \text{ yield}}{er_Z + 1}$$

$$R_Z = \frac{(5.21\% \text{ yield}) * er_Z}{er_Z + 1}$$

using eq. 1,

$$er_{obs} = \frac{R_{1b} + R_Z}{S_{1b} + S_Z} = \frac{1.90\% \text{ yield} + \frac{(5.21\% \text{ yield}) * er_Z}{er_Z + 1}}{0.13\% \text{ yield} + \frac{(5.21\% \text{ yield})}{er_Z + 1}}$$

Solving for  $er_Z$ , we find that  $er_Z = 2.97$ . Hence, **Z-1b** reacts to form **2b** in 50% e.e. under these conditions.

Using the same conditions described above, the reaction of **Z-1b** proceeded to 5% conversion after 24 hr. (compared to 10% after 72 hr.). Hence, it is clear that the reaction does not stall after 24 hr.

## 7. Hammett Analysis

### General procedure for Hammett experiments:

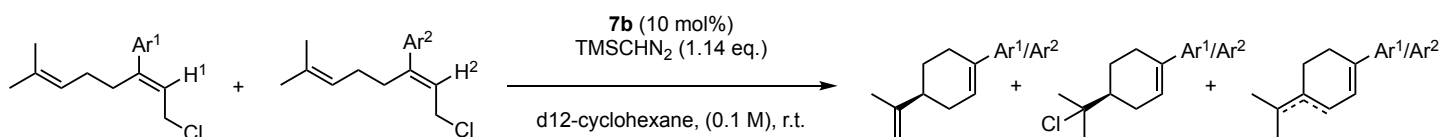

Two substrates were selected for each competition experiment. The primary criterion for substrate selection was that the NMR peaks of the styrenyl protons of the two substrates ( $H^1$  and  $H^2$ ) were sufficiently separated to allow for accurate quantitation of both substrates simultaneously (the more electron withdrawing the arene the further downfield the resonance). A stock-solution of the two substrates (0.076 mmol of each substrate in 1 mL, 0.076 M in each substrate) was prepared in d12-cyclohexane and 460  $\mu$ L of this solution (0.035 mmol of each substrate, 0.5 equiv. of each substrate, 1 equiv. total substrate) was added to an NMR tube followed mesitylene as an internal standard (5  $\mu$ L, 0.036 mmol, 0.51 equiv.) and a solution of TMSCHN<sub>2</sub> in hexanes (40  $\mu$ L of a 2.0 M solution, 0.08 mmol, 1.14 equiv.). The NMR was locked and shimmed on this sample. Separately, a stock-solution of urea **7b** (20.5 mg in 1 mL, 0.035 mmol, 0.035 M) was prepared in d12-cyclohexane. This solution was immediately filtered through a syringe filter to remove any solids which could nucleate catalyst precipitation, and was used within 1 hour of preparation (while catalyst could be dissolved in cyclohexane to relatively high concentrations, it was found to gradually precipitate from solution. Filtering of the solution significantly delayed this precipitation, often allowing cyclohexane solutions of urea **7b** to remain stable for over 24 hours before forming visible precipitate. Because a series of one-pot competition experiments were used, any variation in catalyst precipitation between runs in the Hammett experiments shouldn't alter the relative rates within the competitions, but nevertheless every effort was made to avoid this variability). Then 200  $\mu$ L of the catalyst stock solution (0.0071 mmol, 0.1 equiv.) was added to the NMR tube and the NMR was re-shimmed as quickly as possible. The reaction was then followed by NMR, spacing the acquisitions appropriately for the expected rates of reaction for the two substrates.

### Sample measurement and analysis for Hammett experiments:

The spectra were recorded on a Varian NMR probe (600 MHz) at room temperature in d12-cyclohexane. In order to obtain quantitative results, an acquisition time of 2.5 seconds and a relaxation delay of >57.5 seconds were used. All spectra were processed using Mestrenova. The spectra were aligned by setting the mesitylene peak to 6.69 ppm and then phased using Mestrenova's automatic phase correction followed by a manual phase correction. Then a Bernstein polynomial baseline correction was applied. The

spectra were then normalized such that the integral of mesitylene peak at 6.69 ppm was set to 3000 units. The concentrations of the two starting materials were measured by their styrenyl protons which were integrated relative to the aryl proton of the mesitylene internal standard. The more upfield of the two vinyl protons from minor product **5** (the conjugated diene) overlaps with the styrenyl proton. This was accounted for by subtracting the value of the integral for the more downfield of the vinyl protons in **5** from the integral for the styrenyl proton in the corresponding starting material. Since so little **5** is formed, this correction did not qualitatively change the results of the Hammett analysis, but without it graphs of [SM] vs time do not go to zero. Using the dataset from the entire time course of the reaction, seventh order polynomial fittings of [SM] vs. time were generated using the LINEST feature of Microsoft Excel and the first derivative of the polynomial was taken to produce an expression for reaction rate vs. [SM].<sup>9</sup> The slope of the rate expression was determined using Microsoft Excel, and that value was used to determine relative reaction rates. In addition, the data were fit to a monoexponential function, which gave comparable results (for a comparison of polynomial and exponential fitting in determination of the rate law, see section 9) provided care was taken to exclude data points collected at very high conversions (>95%) in which errors could significantly skew the fit.

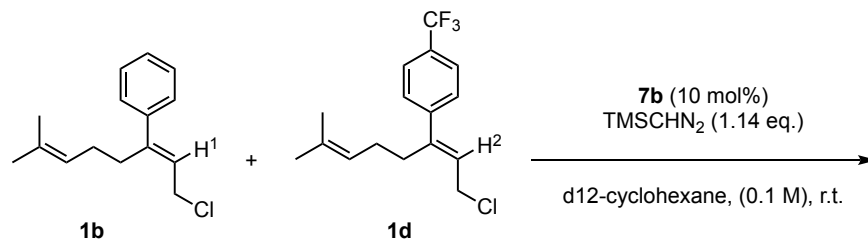

The competition between **1b** and **1d** was conducted according to the general procedure for Hammett experiments. Spectra were acquired every 150 seconds. The seventh order polynomial fits are as follows: [**1b**] =  $-1.16 \times 10^{-30}t^7 + 1.05 \times 10^{-25}t^6 - 3.93 \times 10^{-21}t^5 + 7.82 \times 10^{-17}t^4 - 8.98 \times 10^{-13}t^3 + 5.99 \times 10^{-9}t^2 - 2.19 \times 10^{-5}t + 0.0362$  and [**1d**] =  $-2.37 \times 10^{-33}t^7 + 5.55 \times 10^{-28}t^6 - 3.58 \times 10^{-23}t^5 + 1.16 \times 10^{-18}t^4 - 2.47 \times 10^{-14}t^3 + 4.32 \times 10^{-10}t^2 - 5.94 \times 10^{-6}t + 0.0452$ . The rate constant for the conversion of **1b** was calculated to be -0.000640 and that for **1d** was -0.000132, giving a relative reaction rate  $d[\mathbf{1d}]/d[\mathbf{1b}] = 0.207$ . The exponential fits are as follows [**1b**] =  $0.0369 \times e^{-0.000569t}$  and [**1d**] =  $0.0451 \times e^{-0.000120t}$ . The relative reaction rate from the exponential fitting is  $d[\mathbf{1d}]/d[\mathbf{1b}] = 0.211$ .

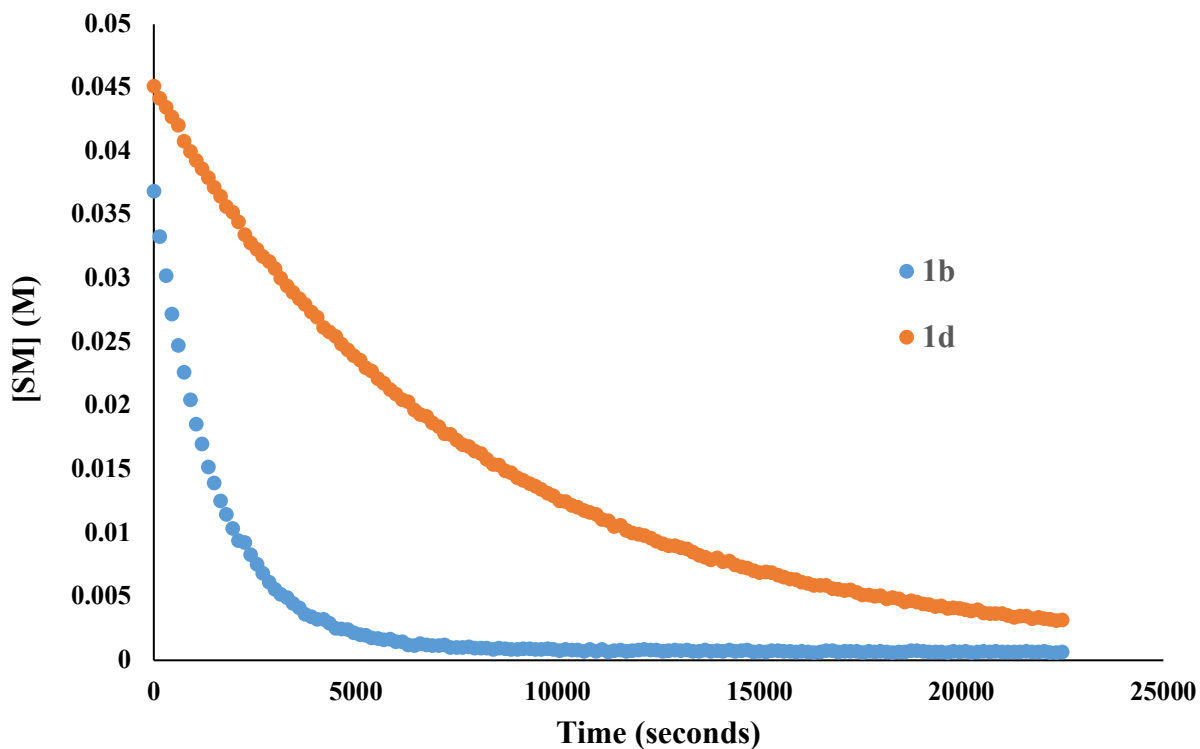

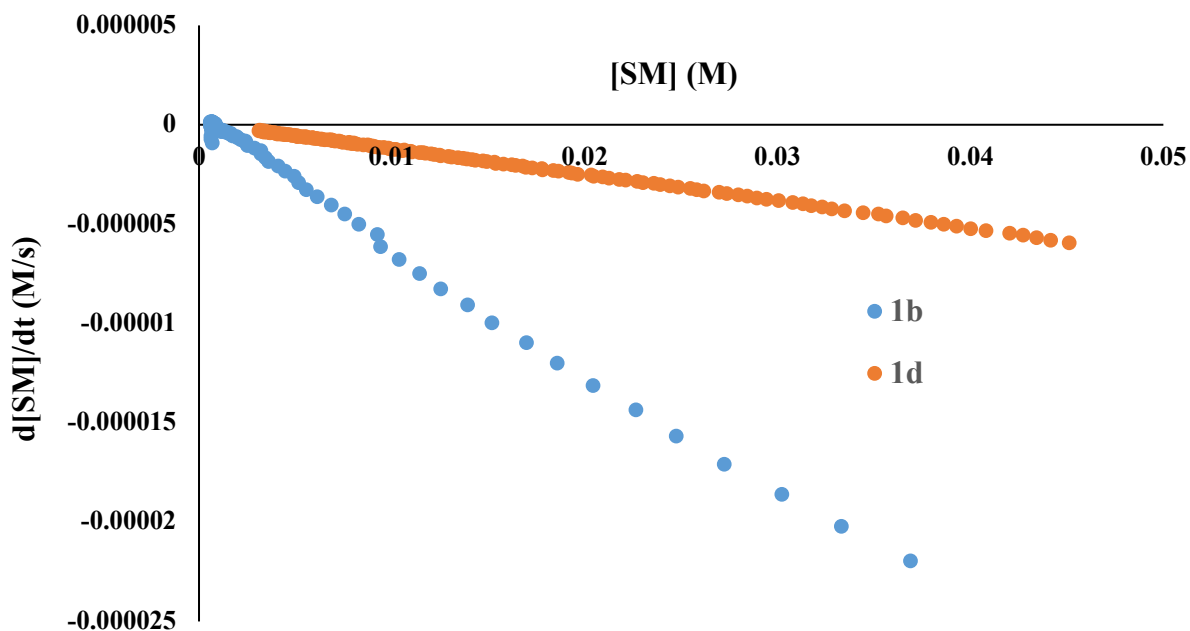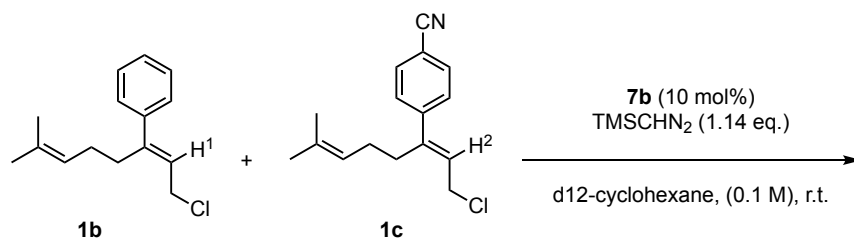

The competition between **1b** and **1c** was conducted according to the general procedure for Hammett experiments. Spectra were acquired every 130 seconds. The seventh order polynomial fits are as follows: [**1b**] =  $-1.47 \cdot 10^{-31} \cdot t^7 + 1.59 \cdot 10^{-26} \cdot t^6 - 7.30 \cdot 10^{-22} \cdot t^5 + 1.85 \cdot 10^{-17} \cdot t^4 - 2.83 \cdot 10^{-13} \cdot t^3 + 2.68 \cdot 10^{-9} \cdot t^2 - 1.50 \cdot 10^{-5} \cdot t + 0.0400$  and [**1c**] =  $2.12 \cdot 10^{-32} \cdot t^7 - 1.56 \cdot 10^{-27} \cdot t^6 + 4.27 \cdot 10^{-23} \cdot t^5 - 5.09 \cdot 10^{-19} \cdot t^4 + 1.52 \cdot 10^{-15} \cdot t^3 + 5.76 \cdot 10^{-11} \cdot t^2 - 2.16 \cdot 10^{-6} \cdot t + 0.0392$ . The rate constant for the conversion of **1b** was calculated to be  $-0.000385$  and that for **1c** was  $-0.0000552$ , giving a relative reaction rate of  $d[\mathbf{1c}]/d[\mathbf{1b}] = 0.143$ . The exponential fits are as follows [**1b**] =  $0.0399 \cdot e^{-0.000366 \cdot t}$  and [**1c**] =  $0.0392 \cdot e^{-0.0000546 \cdot t}$ . The relative reaction rate from the exponential fitting is  $d[\mathbf{1c}]/d[\mathbf{1b}] = 0.149$ .

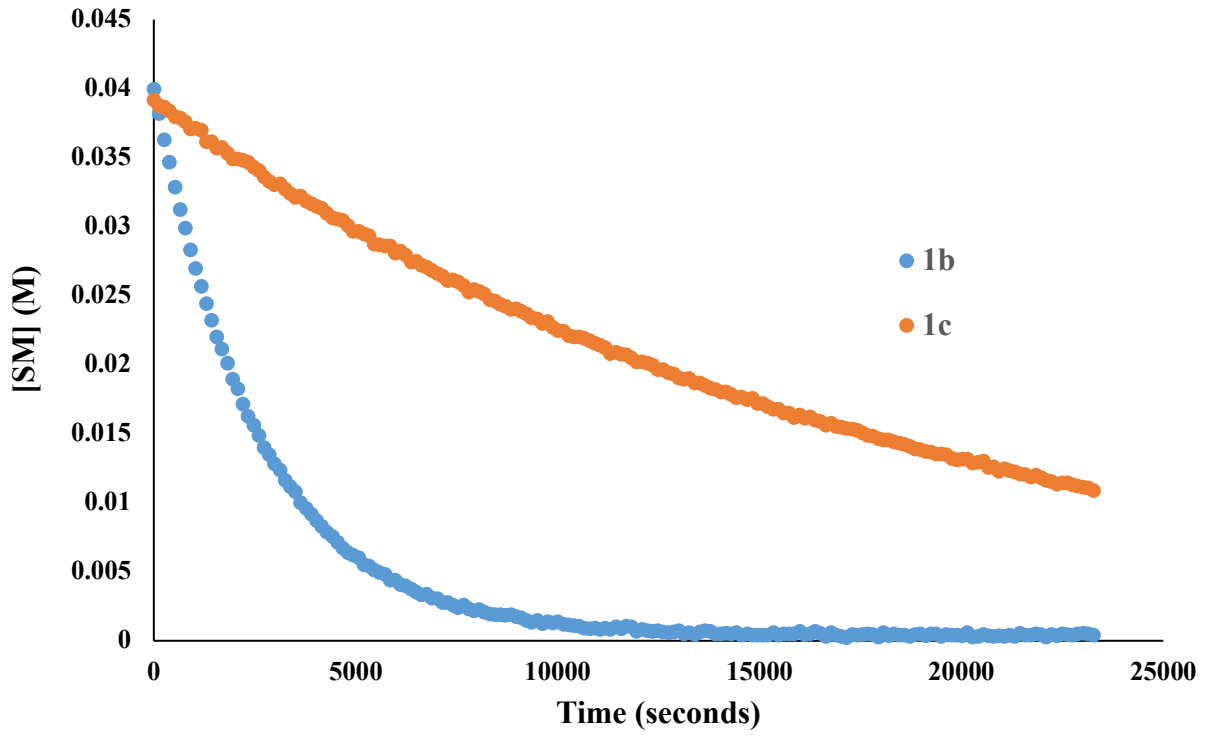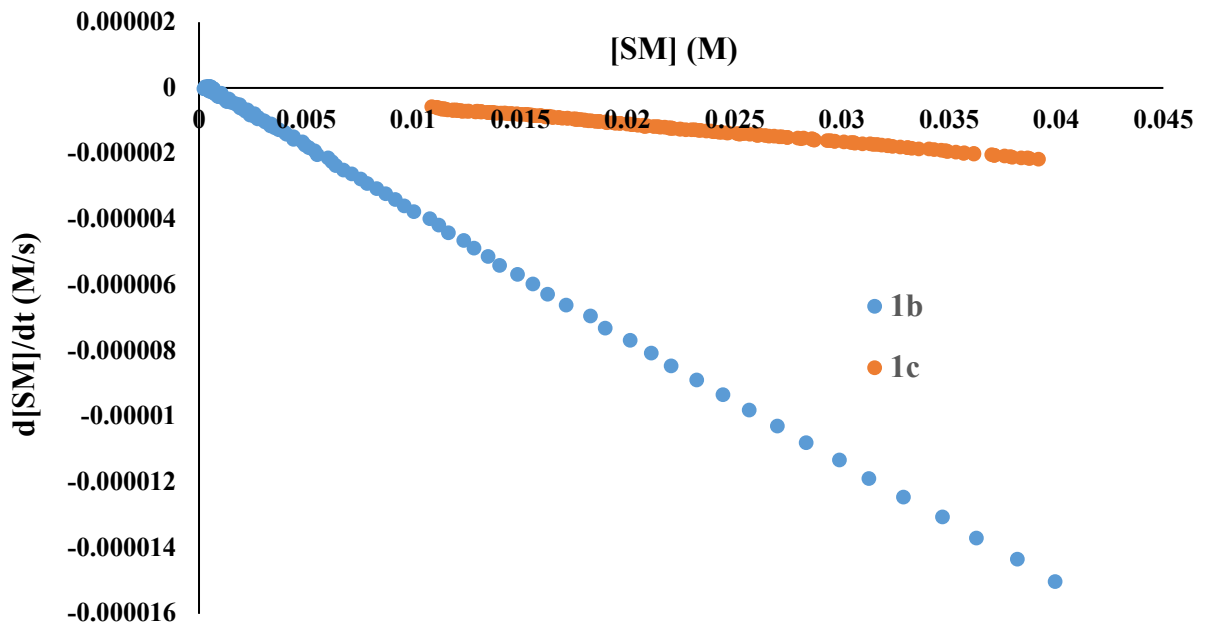

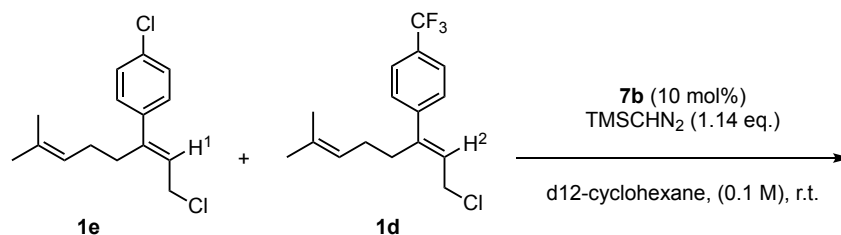

The competition between **1e** and **1d** was conducted according to the general procedure for Hammett experiments with the following modifications: the starting concentration of **1e** was ~0.01 M instead of 0.05 M and it was not possible to subtract trace product **5e** from **1e** due to a contaminant under the peak used to quantitate **5e**. The error introduced by this is negligible since **5e** is formed in less than 5% yield. Spectra were acquired every 150 seconds. The seventh order polynomial fits are as follows:  $[\mathbf{1d}] = 1.74 \cdot 10^{-34} \cdot t^7 - 3.51 \cdot 10^{-29} \cdot t^6 + 2.45 \cdot 10^{-24} \cdot t^5 - 7.43 \cdot 10^{-20} \cdot t^4 + 4.39 \cdot 10^{-16} \cdot t^3 + 4.90 \cdot 10^{-11} \cdot t^2 - 2.25 \cdot 10^{-6} \cdot t + 0.0427$  and  $[\mathbf{1e}] = 1.27 \cdot 10^{-33} \cdot t^7 + 1.99 \cdot 10^{-28} \cdot t^6 - 1.36 \cdot 10^{-23} \cdot t^5 + 5.34 \cdot 10^{-19} \cdot t^4 - 1.31 \cdot 10^{-14} \cdot t^3 + 2.03 \cdot 10^{-10} \cdot t^2 - 1.88 \cdot 10^{-6} \cdot t + 0.00906$ . The rate constant for the conversion of **1e** was calculated to be -0.000233 and that for **1d** was -0.0000540, giving a relative reaction rate of  $d[\mathbf{1e}]/d[\mathbf{1d}] = 4.31$ . The relative reaction rate  $d[\mathbf{1d}]/d[\mathbf{1b}] = 0.207$ . Multiplying the relative rate  $d[\mathbf{1e}]/d[\mathbf{1d}]$  by the relative rate  $d[\mathbf{1d}]/d[\mathbf{1b}]$  gives  $d[\mathbf{1e}]/d[\mathbf{1b}] = 0.892$ . The exponential fits are as follows  $[\mathbf{1d}] = 0.0428 \cdot e^{-0.0000525 \cdot t}$  and  $[\mathbf{1e}] = 0.00932 \cdot e^{-0.000187 \cdot t}$  (data points with  $[\mathbf{1e}] < 0.0025$  M were excluded as they were highly inaccurate and skewed the fitting). The reaction rate from the exponential fitting is  $d[\mathbf{1e}]/d[\mathbf{1d}] = 3.56$ . The relative reaction rate from the exponential fitting for  $d[\mathbf{1d}]/d[\mathbf{1b}] = 0.211$ . Multiplying the relative rate  $d[\mathbf{1e}]/d[\mathbf{1d}]$  by the relative rate  $d[\mathbf{1d}]/d[\mathbf{1b}]$  gives  $d[\mathbf{1e}]/d[\mathbf{1b}] = 0.751$ . Although the 7<sup>th</sup> order polynomial and exponential fittings differ somewhat on the value of  $d[\mathbf{1e}]/d[\mathbf{1b}]$ , both values lead to  $\rho = -1.3$  and  $R^2 = 0.99$ , so the difference is not significant. The larger variability between the two fitting methods here is likely a consequence of the inability to correct for trace **5e** contamination under the peak used to quantitate **1e**.

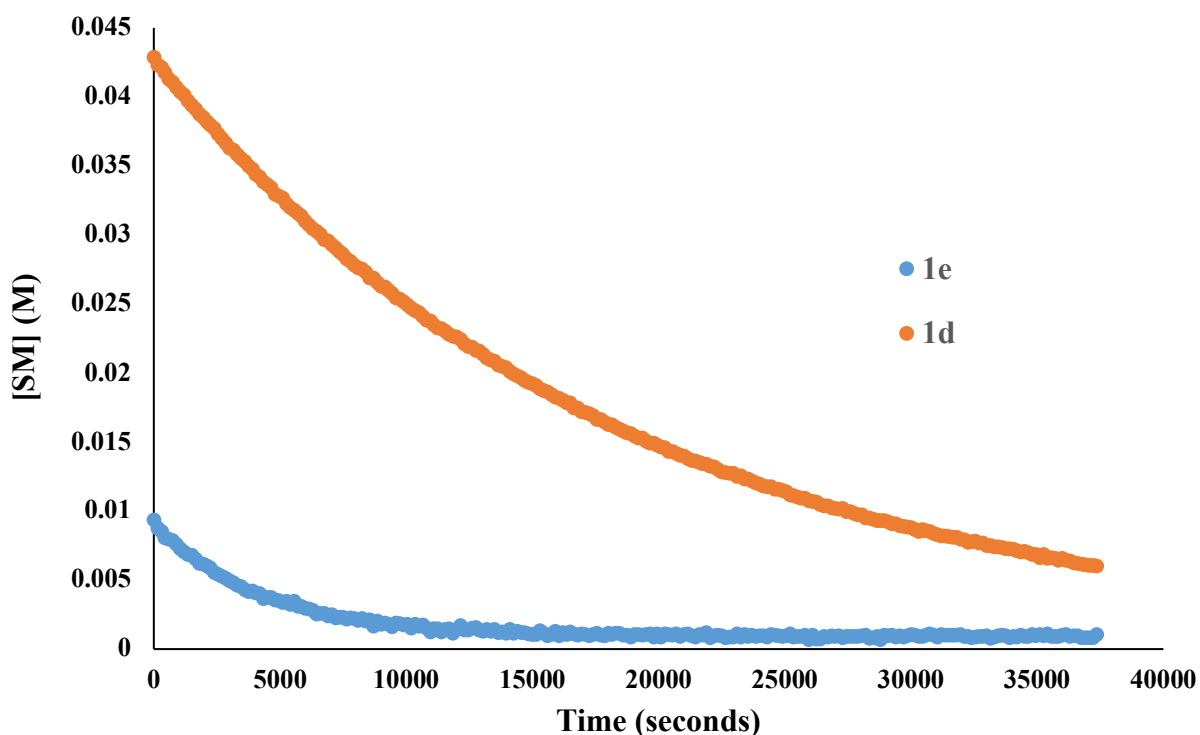



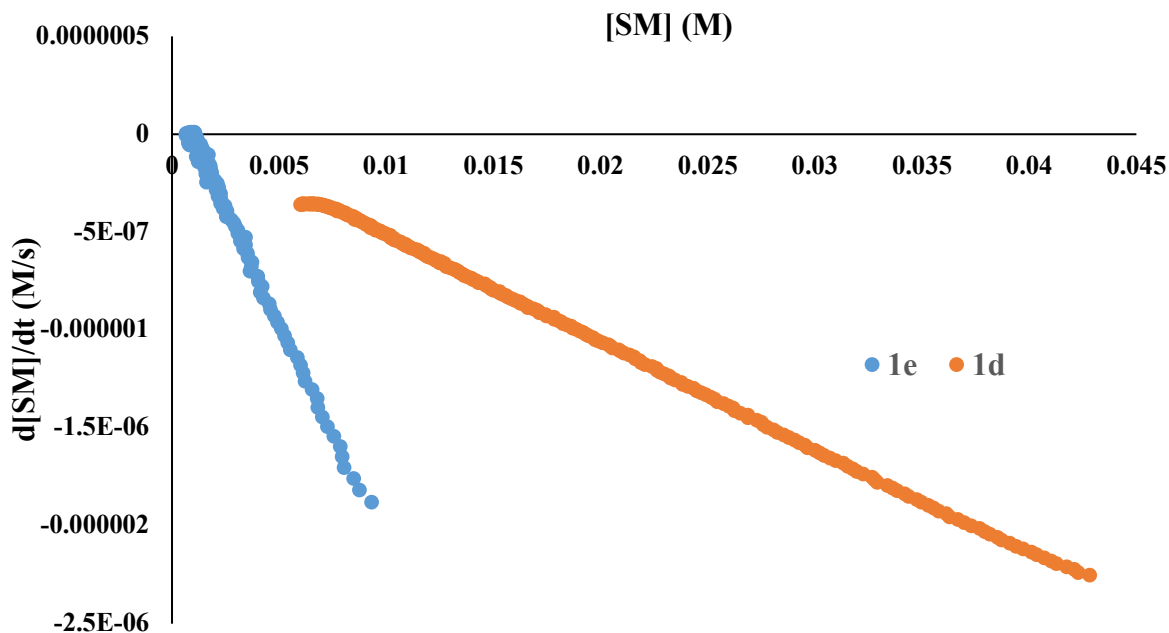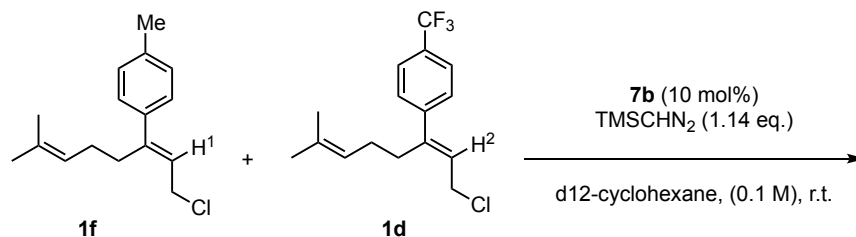

The competition between **1f** and **1d** was conducted according to the general procedure for Hammett experiments with the following modification: 0.005 M urea **7b** was used instead of the standard 0.01 M to try to slow down the reaction of **1f** sufficiently to allow for accurate measurement. The delay between acquisition of spectra started at 60 seconds and increased by 1.5 seconds after every acquisition to try to provide adequate coverage of both the slowly reacting **1d** and rapidly reacting **1f**. The seventh order polynomial fits are as follows:  $[\mathbf{1d}] = 2.92 \cdot 10^{-33} \cdot t^7 - 3.70 \cdot 10^{-28} \cdot t^6 + 1.91 \cdot 10^{-21} \cdot t^5 - 5.14 \cdot 10^{-19} \cdot t^4 + 7.16 \cdot 10^{-15} \cdot t^3 - 8.87 \cdot 10^{-12} \cdot t^2 - 2.14 \cdot 10^{-6} \cdot t + 0.0478$  and  $[\mathbf{1f}] = -2.45 \cdot 10^{-31} \cdot t^7 + 3.18 \cdot 10^{-26} \cdot t^6 - 1.66 \cdot 10^{-21} \cdot t^5 + 4.50 \cdot 10^{-17} \cdot t^4 - 6.69 \cdot 10^{-13} \cdot t^3 + 5.37 \cdot 10^{-9} \cdot t^2 - 2.11 \cdot 10^{-5} \cdot t + 0.0329$ . The rate constant for the conversion of **1f** was calculated to be -0.000730 and that for **1d** was -0.0000485, giving a relative reaction rate of  $d[\mathbf{1f}]/d[\mathbf{1d}] = 15.0$ . Multiplying this by the relative rate  $d[\mathbf{1d}]/d[\mathbf{1b}]$  gives  $d[\mathbf{1f}]/d[\mathbf{1b}] = 3.11$ . The graph of  $d[\mathbf{1f}]/dt$  vs.  $[\mathbf{1f}]$  exhibits curvature potentially consistent with sub-1<sup>st</sup>-order behavior in **1f**. Since **1f** is by far the most reactive substrate, it is possible the carbocyclization step is accelerated such that it becomes comparable in rate to some other step in the catalytic cycle (e.g. removal of HCl), which would account for the apparent sub-1<sup>st</sup> order. Another possible explanation is saturation behavior in **1f**, which could occur if the C-Cl bond of this substrate is sufficiently polarized to favor a catalyst-substrate complex as the resting state. The data from substrate **1d** could be fit to an exponential function as follows:  $[\mathbf{1d}] = 0.0481 \cdot e^{-0.0000488 \cdot t}$ . Since substrate **1f** did not undergo a clear first order decay, its data was not fit to an exponential function.

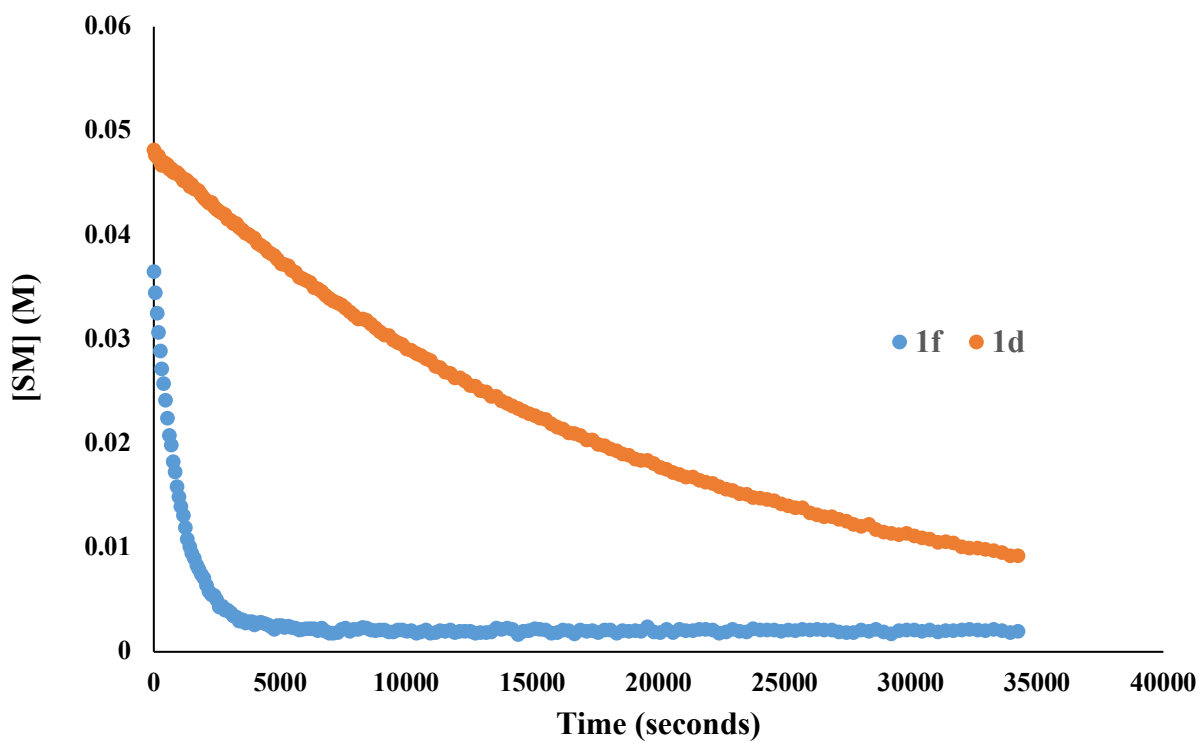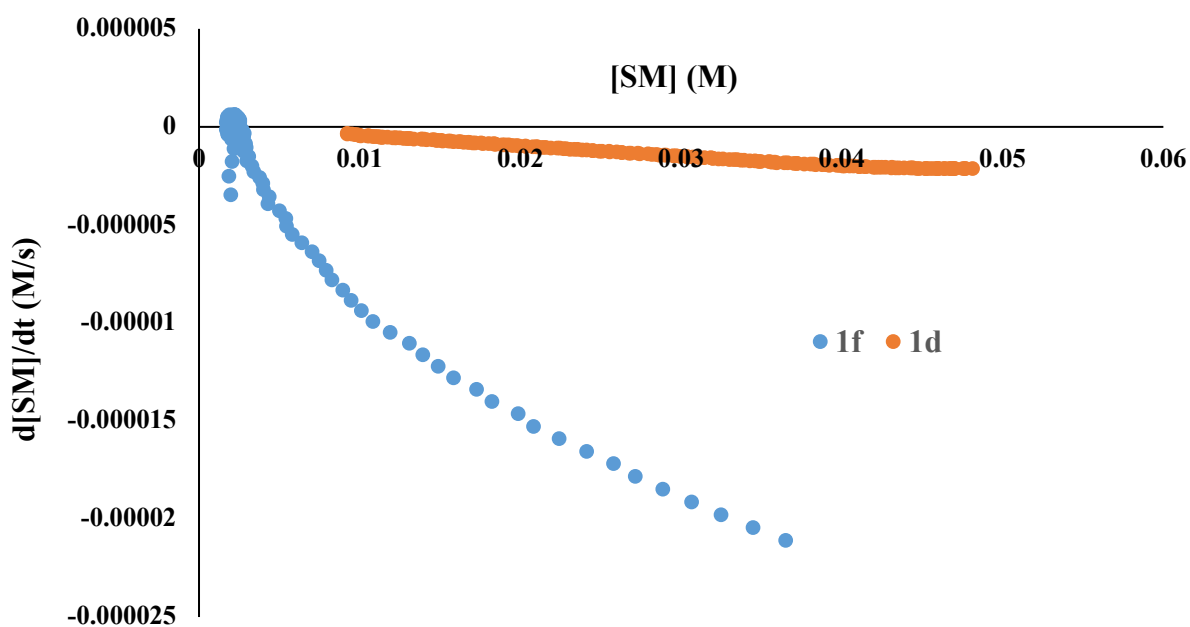

Enantioselectivity values are expressed in kcal/mol and were converted from e.r. values (see section 6.2) observed under optimal conditions using catalyst **7a**. This conversion was performed using the Eyring equation (see section 9.3) where  $R = 1.987E-03$  kcal/(K\* $\mu$ mol) and  $T = 298$  K. We observed the best correlations for both rate and enantioselectivity Hammett studies using  $\sigma^+$  values. Hammett  $\sigma^+$  values for para substituents were drawn from the literature.<sup>7</sup>

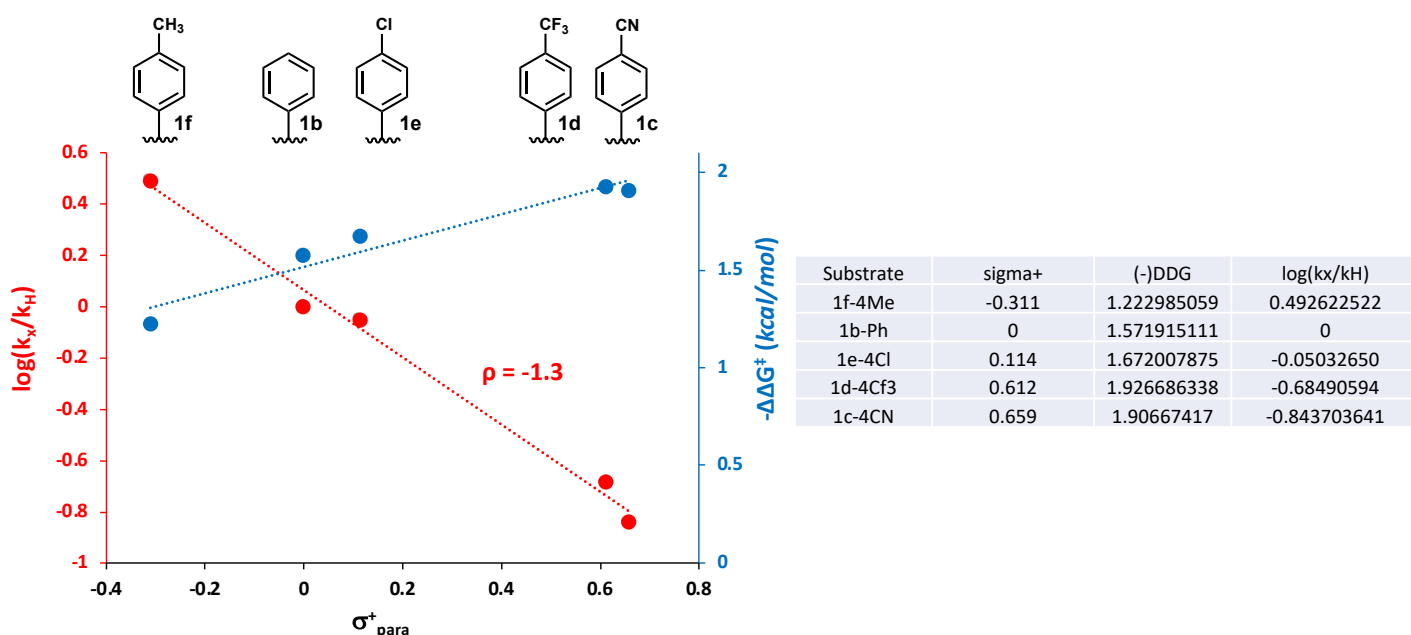

Figure S6. Hammett plots of reaction rate and enantioselectivity.

## 8. Kinetic Isotope Effect Studies

### General procedure for KIE experiments:

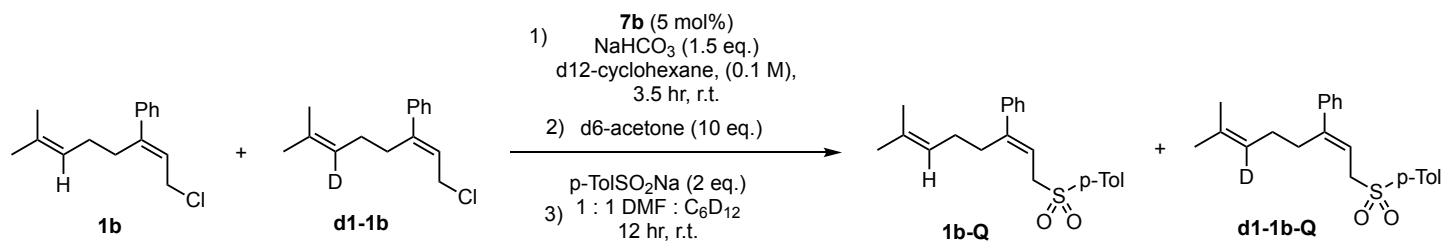

A stock solution was prepared consisting of ~1 : 1 protio-**1b** and deuterio-**1b** (~0.075 mmol protio-**1b** and ~0.075 mmol-deuterio-**1b**, attempting to account for the partial enrichment of the deuterated material) and mesitylene (10  $\mu$ L) in d12-cyclohexane (1.5 mL, 0.1 M total **1b**). 1 mL (0.1 mmol total **1b**, 1 eq.) of this stock solution was added to an oven-dried 0.5-dram vial which had been charged with NaHCO<sub>3</sub> (13 mg, 0.15 mmol, 1.5 eq.), urea **7b** (2.9 mg, 0.005 mmol, 0.05 eq.) and a magnetic stir-bar, and closed with a screw-cap containing a rubber septum. The reaction was allowed to stir at room temperature for 3.5 hours. The remainder of the stock-solution was set aside to use as the R<sub>0</sub> sample. After 3.5 hours (~80% conversion) the reaction was quenched by the addition of d6-acetone (67  $\mu$ L, 1 mmol, 10 eq.) (a control experiment had shown that a reaction quenched in this manner exhibited <1% additional conversion in 17 hours following the quench). Immediately after quenching, 100  $\mu$ L of the crude reaction mixture was diluted into 600  $\mu$ L of pure d12-cyclohexane. Simultaneously, 100  $\mu$ L of the residual starting material stock solution was diluted into 600  $\mu$ L of pure d-12 cyclohexane, and these samples were analyzed by NMR to determine conversion of protio-**1b** relative to mesitylene. The remaining 900  $\mu$ L of the crude, quenched reaction mixture were added to a pre-made suspension of sodium p-toluenesulfonate (36 mg, 0.2 mmol, 2 eq.) in DMF (1 mL), and the suspension was stirred vigorously overnight at room temperature to convert any unreacted allyl chloride into the sulfone **d1-1b-Q**. This derivatization was necessary because the starting allyl chloride is not stable to silica, and therefore, the material recovered from a reaction run to partial conversion could not be purified without derivatization. While it is possible to measure the KIE based on the H/D ratios of the allyl chloride in the starting-material stock solution and the crude, quenched reaction mixture, and this gives numbers very similar to those measured using the sulfone (see below), we concluded that it was important to measure the H/D ratio in rigorously purified material as well because of the small magnitude of the kinetic isotope effect. The remainder of the R<sub>0</sub> sample was derivatized as the sulfone in an identical manner to the quenched reaction – it was added to

a suspension of p-toluenesulfinate (36 mg, 0.2 mmol) in DMF (1 mL) and stirred vigorously overnight. The following day both sulfone formations were worked up identically: the reactions were diluted with Et<sub>2</sub>O and quenched with sat. aq. NaHCO<sub>3</sub>. The aqueous layers were removed and the organic layers were washed 2x with sat. aq. NaHCO<sub>3</sub> and then 3x with brine. The organic layers were then dried over Na<sub>2</sub>SO<sub>4</sub> for 15 minutes, filtered, concentrated, and analyzed by NMR to ensure complete conversion of the allyl chlorides to the sulfones, after which they were purified sequentially by preparatory TLC, preparatory-HPLC (Waters Prep-C18 SunFire® column, 5 μm, 19 × 250 mm, UV detection at 254 nm, gradient elution with 60→95% acetonitrile in water containing 0.1% formic acid over 30 minutes, flow rate: 15 mL/min., retention time = 21.82 min.), and then run through a silica plug eluting with 2:1 pentane : EtOAc. The sulfone R<sub>0</sub> and R<sub>f</sub> samples were then analyzed by NMR.

#### Sample measurement for KIE experiments:

The conversion of protio-**1b** was determined through <sup>1</sup>H-NMR analysis of the diluted substrate stock solution and the diluted, crude, acetone-quenched reaction mixture. The spectra were recorded on a Varian NMR probe (600 MHz) at room temperature in d12-cyclohexane. In order to obtain reproducible and quantitative results spectra were recorded without sample spinning using a calibrated ninety-degree pulse with the transmitter offset frequency set to 269.9 Hz. An acquisition time of 2.5 seconds and relaxation delay of 57.5 seconds were used. Six spectra were recorded for each sample. These spectra could also be used to measure the H/D ratio in the R<sub>0</sub> and R<sub>f</sub> samples, and these measurements gave isotope effects broadly in agreement with those measured using the purified sulfones (see below).

The ratio of H to D in the purified sulfones was determined through <sup>1</sup>H-NMR analysis in CDCl<sub>3</sub>. NMR measurements of the purified R<sub>0</sub> and R<sub>f</sub> samples were conducted in 600 μL of CDCl<sub>3</sub> each at nearly-identical concentrations (as determined by integration of the tolyl methyl relative to the solvent residual peak). Spectra were obtained on a Varian NMR probe (600 MHz) at room temperature. In order to obtain reproducible and quantitative results spectra were recorded without sample spinning using a calibrated ninety-degree pulse with the transmitter offset frequency set to 160.5 Hz. An acquisition time of 2.5 seconds and relaxation delay of 57.5 seconds were used. Four spectra were recorded for each sample.

#### Data analysis for KIE experiments:

All spectra were processed using Mestrenova. Spectra of allyl chlorides in d12-cyclohexane were aligned by setting the mesitylene peak to 6.69 ppm and then phased using Mestrenova's automatic phase correction followed by a manual phase correction. Then a third-order polynomial baseline correction was applied. The spectra were then normalized such that the integral of mesitylene peak at 6.69 ppm was set to 3000 units. Spectra of sulfones in CDCl<sub>3</sub> were aligned by setting the solvent residual peak to 7.26 ppm, and then phased using Mestrenova's automatic phase correction followed by a manual phase correction. Then a third-order polynomial baseline correction was applied. The spectra were normalized such that the integral of the tolyl methyl peak at 2.44 ppm was set to 3000.

The kinetic isotope effect was computed using the following equation

$$\frac{k_H}{k_D} = \frac{\ln(1 - F_H)}{\ln\left((1 - F_H) * \frac{R_f}{R_0}\right)}$$

where:

$$R_0 = \frac{[\text{deutero} - \mathbf{1b}]}{[\text{protio} - \mathbf{1b}]} \text{ in the stock solution of starting material added to the reaction}$$

$$R_f = \frac{[\text{deutero} - \mathbf{1b}]}{[\text{protio} - \mathbf{1b}]} \text{ in the starting material recovered from a reaction run to partial conversion}$$

and F<sub>H</sub> is the fractional conversion of protio-**1b**

Error was determined using the following equation<sup>8</sup>

$$\Delta KIE = KIE * \sqrt{\left(\frac{\Delta KIE_F}{KIE}\right)^2 + \left(\frac{\Delta KIE_R}{KIE}\right)^2}$$

where:

$$\Delta KIE_F = \frac{-\ln(R_f/R_0)}{(1 - F_H) * \ln^2((1 - F_H) * R_f/R_0)} * \Delta F_H$$

$$\Delta KIE_R = \frac{-\ln(1 - F_H)}{(R_f/R_0) * \ln^2((1 - F_H) * R_f/R_0)} * \Delta(R_f/R_0)$$

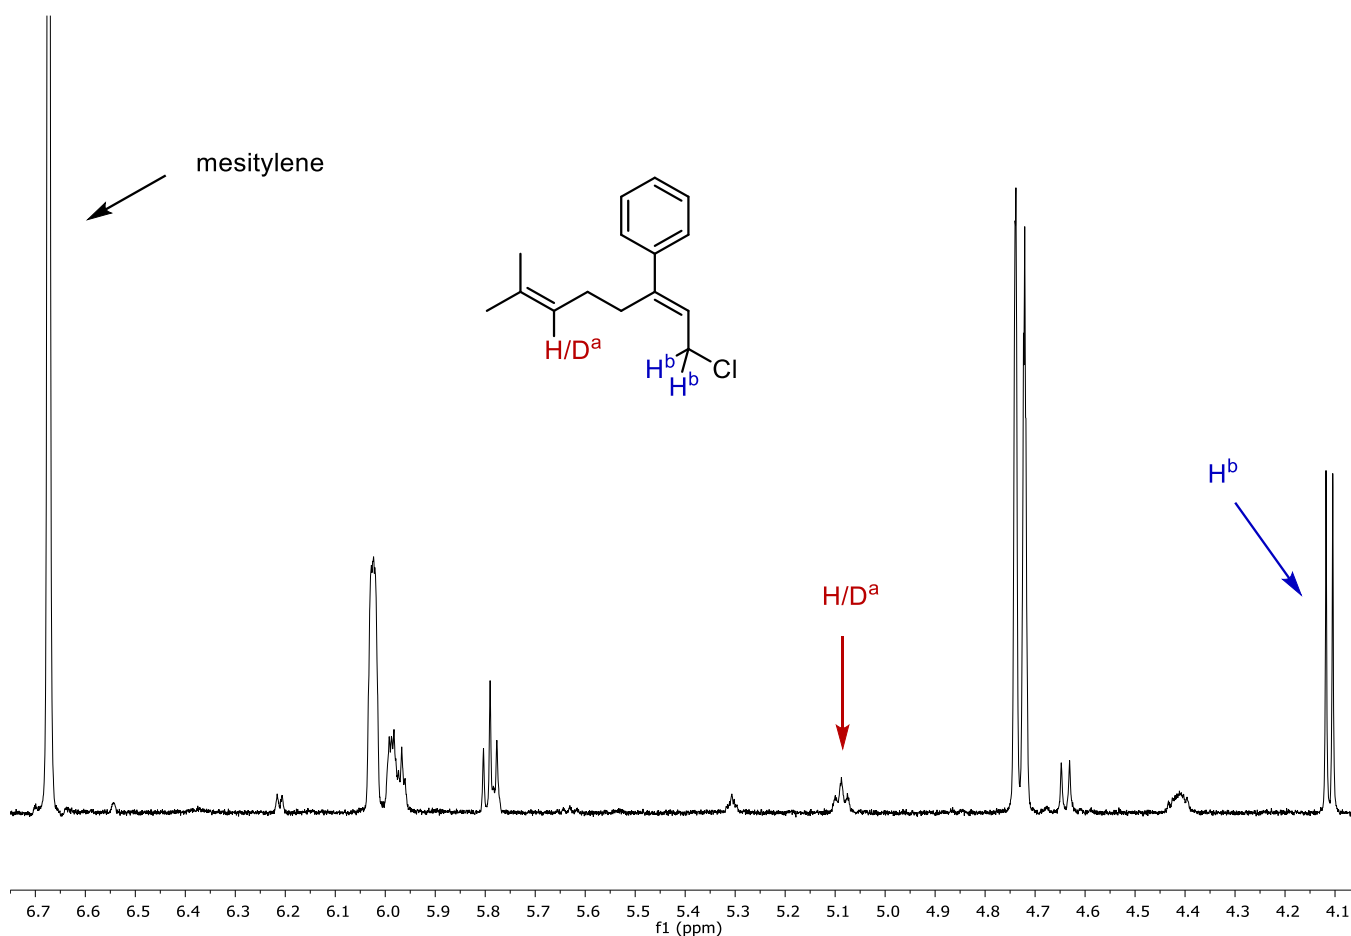

**Figure S7.** Representative  $^1\text{H}$  NMR spectrum of the crude reaction mixture quenched at partial conversion showing the peaks of interest. Spectra were normalized using the mesitylene peak at 6.69 ppm. The vinyl peak at 5.09 ppm ( $\text{H}^a$ ) allows for direct quantification of protio-**1b** relative to mesitylene in the stock solution and crude, quenched reaction mixture. The concentration of deuterio-**1b** relative to mesitylene could be determined by subtracting the concentration of protio-**1b** from half the integral of  $\text{H}^b$  (4.11 ppm), which corresponds to two protons in the combined protio- and deuterio-**1b**.

| Run 1 – R <sub>0</sub> sample – chloride |                            |                              |                                |
|------------------------------------------|----------------------------|------------------------------|--------------------------------|
| Measurement                              | Normalized total <b>1b</b> | Normalized protio- <b>1b</b> | Normalized deuterio- <b>1b</b> |
| 1                                        | 1363.02                    | 674.56                       | 688.46                         |
| 2                                        | 1363.25                    | 674.35                       | 688.90                         |
| 3                                        | 1361.75                    | 674.38                       | 687.38                         |
| 4                                        | 1360.58                    | 674.97                       | 685.61                         |

|                        |         |                    |        |
|------------------------|---------|--------------------|--------|
| 5                      | 1362.48 | 674.19             | 688.29 |
| 6                      | 1361.96 | 674.31             | 687.65 |
| <b>Property</b>        |         |                    |        |
| Normalized protic-1b   | 674.46  | Standard Deviation |        |
| Normalized deuterio-1b | 687.71  | 0.28               |        |
|                        |         | 1.17               |        |

**Figure S8.** Tabulated data for R<sub>0</sub> sample for run 1 based on measurement of the allyl chloride. The R<sub>0</sub> sample for run 1 was prepared and measured according to the general procedure for KIE experiments.

| <b>Run 1 – R<sub>f</sub> sample – chloride</b> |                     |                      |                        |
|------------------------------------------------|---------------------|----------------------|------------------------|
| Measurement                                    | Normalized total 1b | Normalized protic-1b | Normalized deuterio-1b |
| 1                                              | 197.96              | 101.73               | 96.23                  |
| 2                                              | 199.42              | 103.96               | 95.46                  |
| 3                                              | 197.79              | 104.97               | 92.83                  |
| 4                                              | 198.92              | 105.14               | 93.78                  |
| 5                                              | 196.44              | 101.33               | 95.11                  |
| 6                                              | 196.84              | 103.37               | 93.46                  |
| <b>Property</b>                                |                     |                      |                        |
| Normalized protic-1b                           | 103.42              | Standard Deviation   |                        |
| Normalized deuterio-1b                         | 94.48               | 1.61                 |                        |
|                                                |                     | 1.32                 |                        |

**Figure S9.** Tabulated data for R<sub>f</sub> sample for run 1 based on measurement of the allyl chloride. The R<sub>f</sub> sample for run 1 was prepared and measured according to the general procedure for KIE experiments.

| <b>Run 2 – R<sub>0</sub> sample – chloride</b> |                     |                      |                        |
|------------------------------------------------|---------------------|----------------------|------------------------|
| Measurement                                    | Normalized total 1b | Normalized protic-1b | Normalized deuterio-1b |
| 1                                              | 1483.47             | 730.26               | 753.20                 |
| 2                                              | 1482.74             | 730.48               | 752.26                 |
| 3                                              | 1483.07             | 730.82               | 752.25                 |
| 4                                              | 1485.04             | 731.27               | 753.77                 |
| 5                                              | 1484.36             | 731.60               | 752.76                 |
| 6                                              | 1484.88             | 731.26               | 753.61                 |
| <b>Property</b>                                |                     |                      |                        |
| Normalized protic-1b                           | 730.95              | Standard Deviation   |                        |
| Normalized deuterio-1b                         | 752.98              | 0.52                 |                        |
|                                                |                     | 0.66                 |                        |

**Figure S10.** Tabulated data for R<sub>0</sub> sample for run 2 based on measurement of the allyl chloride. The R<sub>0</sub> sample for run 2 was prepared and measured according to the general procedure for KIE experiments.

| <b>Run 2 – R<sub>f</sub> sample – chloride</b> |                     |                      |                        |
|------------------------------------------------|---------------------|----------------------|------------------------|
| Measurement                                    | Normalized total 1b | Normalized protic-1b | Normalized deuterio-1b |
| 1                                              | 218.36              | 116.50               | 101.85                 |
| 2                                              | 219.31              | 114.65               | 104.66                 |
| 3                                              | 219.26              | 116.73               | 102.52                 |
| 4                                              | 220.45              | 117.33               | 103.12                 |
| 5                                              | 219.32              | 114.05               | 105.27                 |
| 6                                              | 221.51              | 116.22               | 105.29                 |
| <b>Property</b>                                |                     |                      |                        |
| Normalized protic-1b                           | 115.91              | Standard Deviation   |                        |
| Normalized deuterio-1b                         | 103.79              | 1.28                 |                        |
|                                                |                     | 1.48                 |                        |

**Figure S11.** Tabulated data for R<sub>f</sub> sample for run 2 based on measurement of the allyl chloride. The R<sub>f</sub> sample for run 2 was prepared and measured according to the general procedure for KIE experiments.

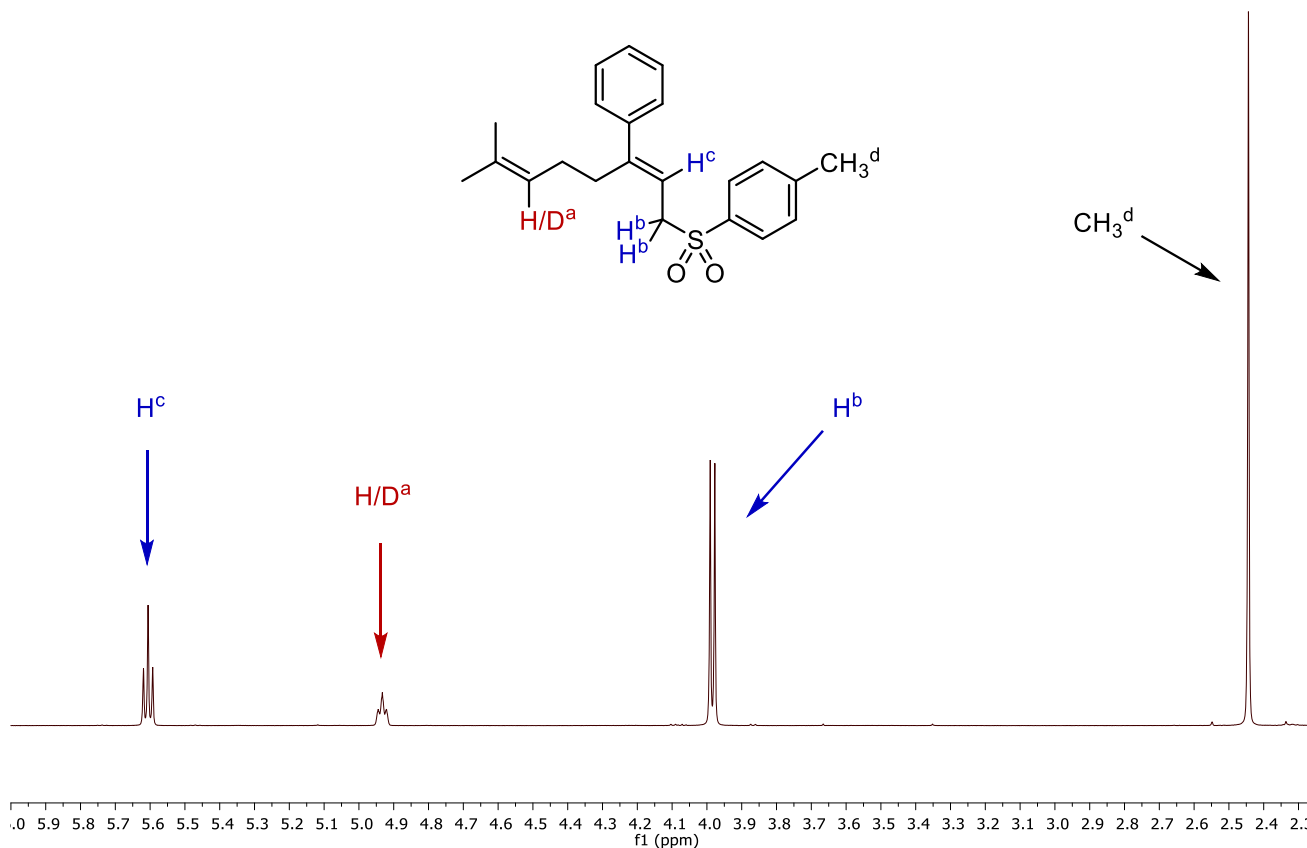

**Figure S12.** Representative <sup>1</sup>H NMR spectrum showing the peaks of interest for sulfone **1b-Q** and **d1-1b-Q**. Spectra were normalized using the tolyl methyl group CH<sub>3</sub><sup>d</sup> (2.44 ppm). The vinyl peak at 4.93 ppm (H<sup>a</sup>) allows for direct quantification of protio **1b-Q** normalized to total **1b-Q** + **d1-1b-Q**. The normalized concentration of **d1-1b-Q** could be determined by subtracting the concentration of **1b-Q** from the integral of H<sup>c</sup> (5.61 ppm), which corresponds to the β-styrenyl proton present in both protio- and deuterio-**1b-Q** or by subtracting the concentration of protio-**1b-Q** from half the integral of H<sup>b</sup> (3.98 ppm), which corresponds to the methylene alpha to the sulfone in both protio- and **d1-1b-Q**. The average of these two values was used to determine the kinetic isotope effect

| Run 1 – R <sub>0</sub> sample – sulfone |                                      |                                          |                                |                                             |                                                 |
|-----------------------------------------|--------------------------------------|------------------------------------------|--------------------------------|---------------------------------------------|-------------------------------------------------|
| Measurement                             | Normalized total <b>1b-Q</b> - vinyl | Normalized total <b>1b-Q</b> - methylene | Normalized protic- <b>1b-Q</b> | Normalized deuterio- <b>1b-Q</b> from vinyl | Normalized deuterio- <b>1b-Q</b> from methylene |
| 1                                       | 993.32                               | 997.12                                   | 484.99                         | 508.33                                      | 512.12                                          |
| 2                                       | 993.29                               | 996.34                                   | 484.79                         | 508.50                                      | 511.55                                          |
| 3                                       | 994.42                               | 996.65                                   | 485.03                         | 509.39                                      | 511.62                                          |
| 4                                       | 993.06                               | 996.64                                   | 484.07                         | 508.99                                      | 512.56                                          |
| Property                                |                                      | Value                                    |                                | Standard Deviation                          |                                                 |
| normalized protic- <b>1b-Q</b>          |                                      | 484.72                                   |                                | 0.45                                        |                                                 |
| normalized deuterio- <b>1b-Q</b>        |                                      | 510.38                                   |                                | 1.75                                        |                                                 |

**Figure S13.** Tabulated data for R<sub>0</sub> sample for run 1 based on measurement of the allyl sulfone. The R<sub>0</sub> sample for run 1 was prepared and measured according to the general procedure for KIE experiments.

| Run 1 – R <sub>f</sub> sample – sulfone |                               |                                   |                        |                                     |                                         |
|-----------------------------------------|-------------------------------|-----------------------------------|------------------------|-------------------------------------|-----------------------------------------|
| Measurement                             | Normalized total 1b-Q - vinyl | Normalized total 1b-Q - methylene | Normalized protic-1b-Q | Normalized deuterio-1b-Q from vinyl | Normalized deuterio-1b-Q from methylene |
| 1                                       | 981.87                        | 989.52                            | 510.20                 | 471.67                              | 479.32                                  |
| 2                                       | 981.67                        | 989.68                            | 509.67                 | 472.00                              | 480.01                                  |
| 3                                       | 982.57                        | 989.76                            | 510.34                 | 472.24                              | 479.42                                  |
| 4                                       | 982.31                        | 990.01                            | 508.49                 | 473.83                              | 481.52                                  |
| Property                                |                               | Value                             |                        | Standard Deviation                  |                                         |
| normalized protic-1b-Q                  |                               | 509.67                            |                        | 0.84                                |                                         |
| normalized deuterio-1b-Q                |                               | 476.25                            |                        | 4.18                                |                                         |

**Figure S14.** Tabulated data for R<sub>f</sub> sample for run 1 based on measurement of the allyl sulfone. The R<sub>f</sub> sample for run 1 was prepared and measured according to the general procedure for KIE experiments.

| Run 2 – R <sub>0</sub> sample – sulfone |                               |                                   |                        |                                     |                                         |
|-----------------------------------------|-------------------------------|-----------------------------------|------------------------|-------------------------------------|-----------------------------------------|
| Measurement                             | Normalized total 1b-Q - vinyl | Normalized total 1b-Q - methylene | Normalized protic-1b-Q | Normalized deuterio-1b-Q from vinyl | Normalized deuterio-1b-Q from methylene |
| 1                                       | 1000.42                       | 998.98                            | 488.10                 | 512.32                              | 510.88                                  |
| 2                                       | 999.77                        | 998.65                            | 487.96                 | 511.81                              | 510.69                                  |
| 3                                       | 999.77                        | 999.20                            | 487.61                 | 512.17                              | 511.60                                  |
| 4                                       | 999.41                        | 999.34                            | 488.17                 | 511.24                              | 511.18                                  |
| Property                                |                               | Value                             |                        | Standard Deviation                  |                                         |
| normalized protic-1b-Q                  |                               | 487.96                            |                        | 0.25                                |                                         |
| normalized deuterio-1b-Q                |                               | 511.49                            |                        | 0.59                                |                                         |

**Figure S15.** Tabulated data for R<sub>0</sub> sample for run 2 based on measurement of the allyl sulfone. The R<sub>0</sub> sample for run 1 was prepared and measured according to the general procedure for KIE experiments.

| Run 2 – R <sub>f</sub> sample – sulfone |                               |                                   |                        |                                     |                                         |
|-----------------------------------------|-------------------------------|-----------------------------------|------------------------|-------------------------------------|-----------------------------------------|
| Measurement                             | Normalized total 1b-Q - vinyl | Normalized total 1b-Q - methylene | Normalized protic-1b-Q | Normalized deuterio-1b-Q from vinyl | Normalized deuterio-1b-Q from methylene |
| 1                                       | 995.75                        | 997.44                            | 512.35                 | 483.40                              | 485.09                                  |
| 2                                       | 997.08                        | 997.62                            | 512.55                 | 484.53                              | 485.07                                  |
| 3                                       | 996.39                        | 997.93                            | 512.93                 | 483.46                              | 485.00                                  |
| 4                                       | 995.64                        | 997.47                            | 512.57                 | 483.07                              | 484.90                                  |
| Property                                |                               | Value                             |                        | Standard Deviation                  |                                         |
| normalized protic-1b-Q                  |                               | 512.60                            |                        | 0.24                                |                                         |
| normalized deuterio-1b-Q                |                               | 484.31                            |                        | 0.86                                |                                         |

**Figure S16.** Tabulated data for R<sub>f</sub> sample for run 2 based on measurement of the allyl sulfone. The R<sub>f</sub> sample for run 2 was prepared and measured according to the general procedure for KIE experiments.



| KIE measurements                          |              |              |              |              |
|-------------------------------------------|--------------|--------------|--------------|--------------|
| Property                                  | Run 1        |              | Run 2        |              |
|                                           | Value        | Error        | Value        | Error        |
| 1-F <sub>H</sub>                          | 0.1533       | 0.0024       | 0.1586       | 0.0018       |
| R <sub>f</sub> /R <sub>0</sub> – chloride | 0.8959       | 0.0188       | 0.8692       | 0.0157       |
| R <sub>f</sub> /R <sub>0</sub> - sulfone  | 0.8874       | 0.0085       | 0.9014       | 0.0020       |
| <b>KIE – chloride</b>                     | <b>0.945</b> | <b>0.010</b> | <b>0.929</b> | <b>0.008</b> |
| <b>KIE – sulfone</b>                      | <b>0.940</b> | <b>0.005</b> | <b>0.947</b> | <b>0.001</b> |

**Figure S17.** Tabulated data for KIE experiments. All values were calculated using the equations described above. The presence of a small, inverse secondary H/D KIE is consistent with the proposed mechanism and with literature precedent.

The reported KIE of 0.944(3) in the text is an average of the two sulfone numbers using standard propagation of error.

## 9. Kinetics Experiments

### 9.1 General considerations

All kinetics experiments were performed by collecting <sup>1</sup>H NMR spectra of reactions conducted in oven-dried 5 mm diameter NMR tubes using an INOVA-600 NMR spectrometer (600 MHz). Experiments were conducted at room temperature over a period of 4-10 hours, with spectra collection defined at fixed intervals (generally 100-200 sec.). Reactions were performed in a 6:1 (v/v) mixture of cyclohexane-*d*<sub>12</sub>/ dichloromethane-*d*<sub>2</sub> with 1.15 eq. of trimethylsilyldiazomethane (TMS-diazomethane) as the base, except when noted. This solvent blend was used to ensure that all reaction components remained soluble over the course of experiments. TMS-diazomethane was used as the base because sodium bicarbonate is not soluble in organic solvents and the spinning in the NMR probe was not found to be strong enough to promote phase-transfer to quench hydrochloric acid (a byproduct of the cyclization reaction). Hydrochloric acid inhibits catalysts **7a-7d**, and in the absence of base, the reaction stalls. Under these conditions, substrate **1b** was found to undergo reaction to produce products **2b-5b** quantitatively and with similar e.e. (under these conditions, 84% e.e. for **2b** using **7b**) to what was observed under optimal conditions reported in section 5.2. It was found that over all time scales surveyed, **1b** did not undergo a measurable background cyclization reaction (either in the presence or absence of added base). <sup>1</sup>H NMR spectra were analyzed in Mnova (Mestrelab Research) using phase and baseline corrections. Data extracted from these spectra were analyzed and plotted using Microsoft Excel. Curve-fitting was performed using Microsoft Excel's solver function to minimize the sum of the squared difference between fitted data and experimental data.

### 9.2 Derivation of the rate law

To determine the rate law for the cyclization reaction, model substrate **1b** was used with catalyst **7b** and TMS-diazomethane. A same excess experiment<sup>9</sup> was used to confirm that no catalyst deactivation or product inhibition were occurring under the reaction conditions. A different excess experiment<sup>9</sup> was used to determine the order in substrate **1b** and base by varying the concentration of base (TMS-diazomethane) present.

*A representative procedure for kinetics experiments is provided:*

An oven-dried 5mm NMR tube capped was charged with a 600 μL stock solution of substrate **1b** (0.07 mmol), TMS-diazomethane (2 M in Hexanes, 0.081 mmol), HPLC-grade hexanes (35 μL), and mesitylene (0.036 mmol) in C<sub>6</sub>D<sub>12</sub>. The tube was capped with a rubber septum and sealed with parafilm. Then, a single spectrum was obtained for the purposes of determining the appropriate acquisition parameters (shim, gain, etc.). The NMR tube was removed from the spectrometer and a 100 μL stock solution of catalyst **7b** (0.007 mmol) in CD<sub>2</sub>Cl<sub>2</sub> was added to initiate reactions. The NMR tube was inverted several times and then returned to the NMR probe. The time delay between addition of catalyst stock solution and the beginning of data acquisition was recorded and factored into kinetic models. Spectra were collected at regular intervals (typically an acquisition time of 2.5 sec. with a 110 sec. relaxation delay).

Substrate concentration was determined by integration of the signals corresponding to the vinylogous proton on the electrophilic olefin of **1b** (δ = 5.8 ppm) against the mesitylene internal standard (using the aryl CH peak at δ = 6.7 ppm) (a resonance corresponding to product **5b** was found to overlap with this vinyl signal; the concentration of **5b** could be monitored using another vinyl peak at 6.27 ppm and was subtracted from the overall area of the peak corresponding to **1b**). For all reactions, it was found that no significant side

products were formed and that monitoring consumption of starting material or formation of product provided identical results (the mass balance is nearly unity). The  $[1b]$  versus time data were fit to a 7<sup>th</sup> order polynomial using a minimization of squares algorithm in Microsoft Excel. This fit was differentiated with respect to time to obtain rate versus  $[1b]$  data. This analysis established a first-order dependence of reaction rate on  $[1b]$  and a 0 order dependence on  $[TMS\text{-diazomethane}]$ . Hence,  $[1b]$  versus time data could also be fit to exponential functions of the form  $[1b] = [1b]_0 \text{EXP}(-kt)$  with identical results (where  $[1b]_0$  is the initial concentration of  $1b$ ,  $t$  is time, and  $k$  is the first-order rate constant for the reaction).

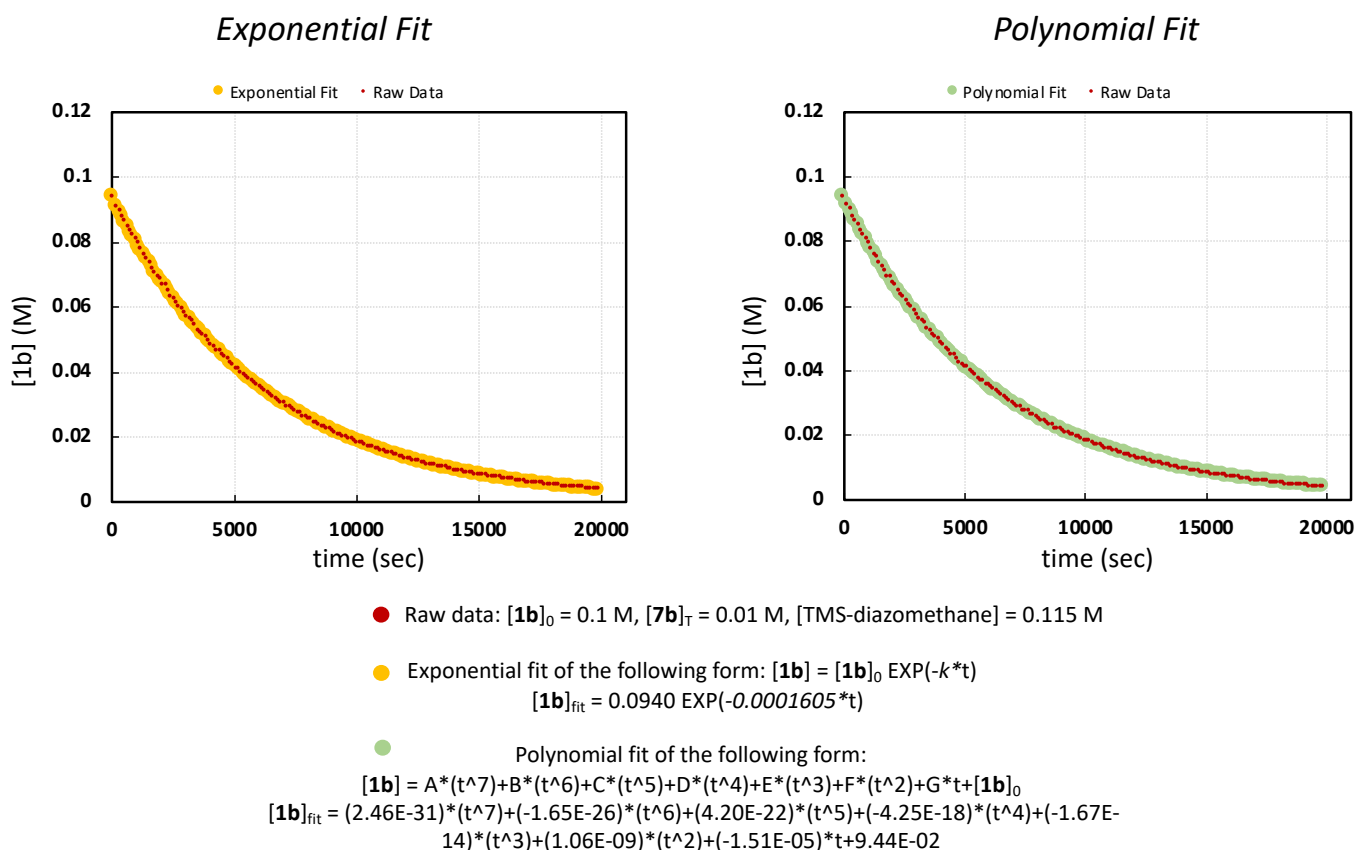

**Figure S18.** Concentration versus time profiles for the cyclization of substrate **1b** with catalyst **7b** and fits to exponential (left) and polynomial (right) functions.

The *same excess experiment* consisted of two runs: (Red:  $[1b]_0 = 0.1 \text{ M}$ ,  $[7b]_T = 0.01 \text{ M}$ ,  $[TMS\text{-diazomethane}] = 0.115 \text{ M}$ ) and (Blue:  $[1b]_0 = 0.05 \text{ M}$ ,  $[7b]_T = 0.01 \text{ M}$ ,  $[TMS\text{-diazomethane}] = 0.065 \text{ M}$ ).

The *different excess experiment* consisted of two runs: (Red:  $[1b]_0 = 0.1 \text{ M}$ ,  $[7b]_T = 0.01 \text{ M}$ ,  $[TMS\text{-diazomethane}] = 0.115 \text{ M}$ ) and (Grey:  $[1b]_0 = 0.1 \text{ M}$ ,  $[7b]_T = 0.01 \text{ M}$ ,  $[TMS\text{-diazomethane}] = 0.215 \text{ M}$ ).

From these data, it is concluded that the reaction is kinetically well-behaved, overall first-order, and that rate is proportional to  $[1b]^1$

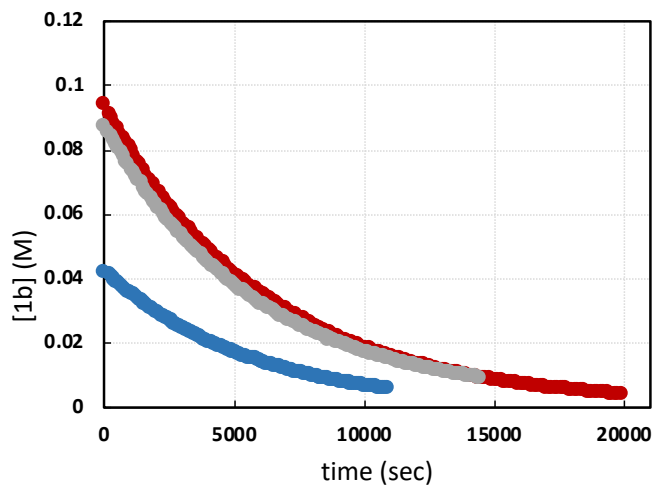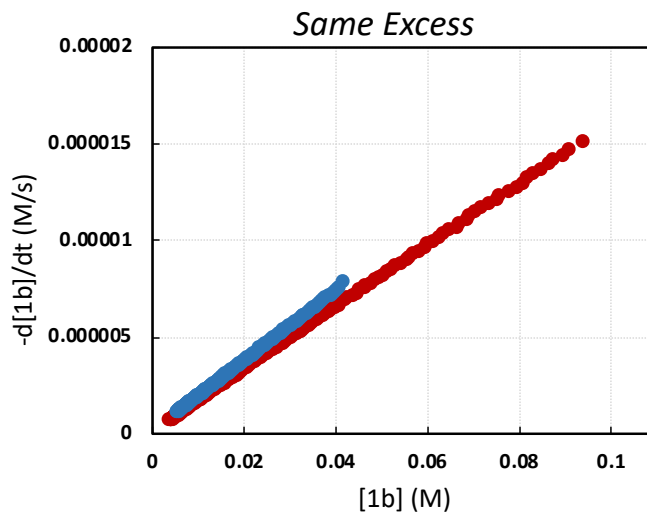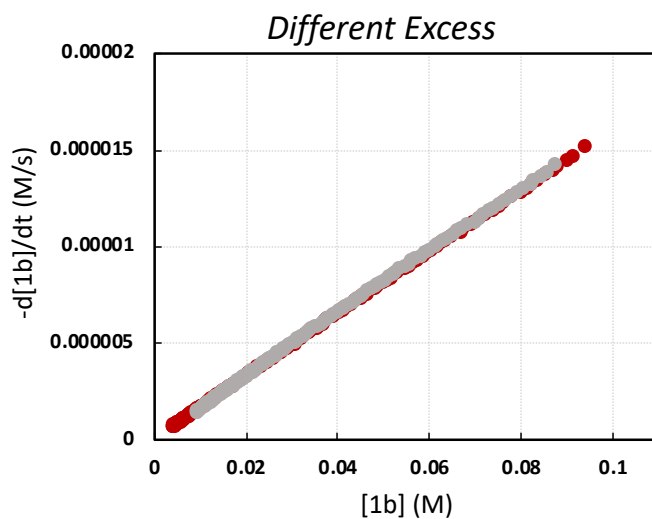

| color | [1b] <sub>0</sub> | [TMSCHN <sub>2</sub> ] <sub>0</sub> | [7b] <sub>T</sub> |
|-------|-------------------|-------------------------------------|-------------------|
| ●     | 0.1 M             | 0.115 M                             | 0.01 M            |
| ●     | 0.05 M            | 0.065 M                             | 0.01 M            |
| ●     | 0.1 M             | 0.215 M                             | 0.01 M            |

**Figure S19.** Reaction profiles for the cyclization of substrate **1b** with catalyst **7b** using differentiated exponential fits for same and different excess experiments.

| Red      |            |            | Blue     |            |            | Grey     |            |            |
|----------|------------|------------|----------|------------|------------|----------|------------|------------|
| Time (s) | [1b] (M)   | rate (M/s) | Time (s) | [1b] (M)   | rate (M/s) | Time (s) | [1b] (M)   | rate (M/s) |
| 0        | 0.09415391 | 1.5085E-05 | 0        | 0.04210802 | 7.7961E-06 | 0        | 0.08767717 | 1.4142E-05 |
| 195      | 0.09139376 | 1.462E-05  | 204      | 0.04131354 | 7.5125E-06 | 178      | 0.08583576 | 1.3739E-05 |
| 305      | 0.09012227 | 1.4364E-05 | 276      | 0.0408514  | 7.4149E-06 | 274      | 0.08458595 | 1.3527E-05 |
| 415      | 0.0879139  | 1.4113E-05 | 348      | 0.040412   | 7.3186E-06 | 370      | 0.08288591 | 1.3318E-05 |
| 525      | 0.08693511 | 1.3866E-05 | 420      | 0.03964442 | 7.2235E-06 | 466      | 0.08212147 | 1.3112E-05 |
| 635      | 0.08523127 | 1.3623E-05 | 492      | 0.03916763 | 7.1296E-06 | 562      | 0.08069982 | 1.2909E-05 |
| 745      | 0.08354983 | 1.3385E-05 | 564      | 0.03873277 | 7.037E-06  | 658      | 0.07930324 | 1.271E-05  |
| 855      | 0.08226607 | 1.315E-05  | 636      | 0.03815433 | 6.9456E-06 | 754      | 0.07810846 | 1.2513E-05 |
| 965      | 0.081254   | 1.292E-05  | 708      | 0.03775596 | 6.8553E-06 | 850      | 0.07647719 | 1.232E-05  |
| 1075     | 0.07999323 | 1.2694E-05 | 780      | 0.03720157 | 6.7663E-06 | 946      | 0.07547676 | 1.2129E-05 |
| 1185     | 0.07804206 | 1.2472E-05 | 852      | 0.0368093  | 6.6783E-06 | 1042     | 0.07411822 | 1.1942E-05 |
| 1295     | 0.07615363 | 1.2254E-05 | 924      | 0.03616138 | 6.5916E-06 | 1138     | 0.07319167 | 1.1757E-05 |
| 1405     | 0.07542339 | 1.2039E-05 | 996      | 0.03572475 | 6.5059E-06 | 1234     | 0.07165174 | 1.1575E-05 |

|      |            |            |      |            |            |      |            |            |
|------|------------|------------|------|------------|------------|------|------------|------------|
| 1515 | 0.07391039 | 1.1828E-05 | 1068 | 0.03529752 | 6.4214E-06 | 1330 | 0.07101331 | 1.1396E-05 |
| 1625 | 0.07225333 | 1.1621E-05 | 1140 | 0.03507455 | 6.338E-06  | 1426 | 0.06994665 | 1.122E-05  |
| 1735 | 0.07099064 | 1.1418E-05 | 1212 | 0.03441107 | 6.2556E-06 | 1522 | 0.06828565 | 1.1047E-05 |
| 1845 | 0.06954994 | 1.1218E-05 | 1284 | 0.03394573 | 6.1743E-06 | 1618 | 0.06691865 | 1.0876E-05 |
| 1955 | 0.06917613 | 1.1022E-05 | 1356 | 0.03348552 | 6.0941E-06 | 1714 | 0.06615265 | 1.0708E-05 |
| 2065 | 0.06727846 | 1.0829E-05 | 1428 | 0.03313524 | 6.0149E-06 | 1810 | 0.06515635 | 1.0542E-05 |
| 2175 | 0.06690348 | 1.0639E-05 | 1500 | 0.03272804 | 5.9368E-06 | 1906 | 0.06396705 | 1.0379E-05 |
| 2285 | 0.06506439 | 1.0453E-05 | 1572 | 0.03221794 | 5.8597E-06 | 2002 | 0.06331029 | 1.0219E-05 |
| 2395 | 0.06368217 | 1.027E-05  | 1644 | 0.03190201 | 5.7835E-06 | 2098 | 0.06186305 | 1.0061E-05 |
| 2505 | 0.06283945 | 1.009E-05  | 1716 | 0.03143342 | 5.7084E-06 | 2194 | 0.06143245 | 9.9054E-06 |
| 2615 | 0.0617299  | 9.9138E-06 | 1788 | 0.03104759 | 5.6342E-06 | 2290 | 0.06024119 | 9.7523E-06 |
| 2725 | 0.06051791 | 9.7402E-06 | 1860 | 0.03064501 | 5.561E-06  | 2386 | 0.05919035 | 9.6015E-06 |
| 2835 | 0.05982978 | 9.5697E-06 | 1932 | 0.03026277 | 5.4887E-06 | 2482 | 0.0583954  | 9.4531E-06 |
| 2945 | 0.05862272 | 9.4022E-06 | 2004 | 0.02989587 | 5.4174E-06 | 2578 | 0.0572176  | 9.307E-06  |
| 3055 | 0.05732525 | 9.2377E-06 | 2076 | 0.02938609 | 5.347E-06  | 2674 | 0.05635598 | 9.1631E-06 |
| 3165 | 0.0565858  | 9.076E-06  | 2148 | 0.02893727 | 5.2776E-06 | 2770 | 0.0555627  | 9.0214E-06 |
| 3275 | 0.05587157 | 8.9171E-06 | 2220 | 0.02875656 | 5.209E-06  | 2866 | 0.05462924 | 8.882E-06  |
| 3385 | 0.05483534 | 8.761E-06  | 2292 | 0.02842344 | 5.1413E-06 | 2962 | 0.0536337  | 8.7447E-06 |
| 3495 | 0.05318558 | 8.6077E-06 | 2364 | 0.02796885 | 5.0745E-06 | 3058 | 0.0528144  | 8.6095E-06 |
| 3605 | 0.05240671 | 8.457E-06  | 2436 | 0.02754673 | 5.0086E-06 | 3154 | 0.05201667 | 8.4764E-06 |
| 3715 | 0.05161076 | 8.309E-06  | 2508 | 0.02724228 | 4.9435E-06 | 3250 | 0.05126537 | 8.3454E-06 |
| 3825 | 0.05091351 | 8.1636E-06 | 2580 | 0.02690072 | 4.8793E-06 | 3346 | 0.05036093 | 8.2164E-06 |
| 3935 | 0.04999325 | 8.0207E-06 | 2652 | 0.02656475 | 4.8159E-06 | 3442 | 0.04976876 | 8.0893E-06 |
| 4045 | 0.04893656 | 7.8803E-06 | 2724 | 0.02618033 | 4.7533E-06 | 3538 | 0.04883526 | 7.9643E-06 |
| 4155 | 0.04819577 | 7.7423E-06 | 2796 | 0.02589687 | 4.6916E-06 | 3634 | 0.04836497 | 7.8412E-06 |
| 4265 | 0.04691722 | 7.6068E-06 | 2868 | 0.02558316 | 4.6306E-06 | 3730 | 0.04749146 | 7.72E-06   |
| 4375 | 0.04663768 | 7.4737E-06 | 2940 | 0.02513522 | 4.5704E-06 | 3826 | 0.04637521 | 7.6006E-06 |
| 4485 | 0.04534897 | 7.3429E-06 | 3012 | 0.0249031  | 4.511E-06  | 3922 | 0.04580807 | 7.4831E-06 |
| 4595 | 0.04507267 | 7.2143E-06 | 3084 | 0.02454881 | 4.4524E-06 | 4018 | 0.0451254  | 7.3674E-06 |
| 4705 | 0.04408244 | 7.0881E-06 | 3156 | 0.02418896 | 4.3946E-06 | 4114 | 0.04426474 | 7.2536E-06 |
| 4815 | 0.04298298 | 6.964E-06  | 3228 | 0.02383296 | 4.3375E-06 | 4210 | 0.04398219 | 7.1414E-06 |
| 4925 | 0.04239247 | 6.8421E-06 | 3300 | 0.02353194 | 4.2811E-06 | 4306 | 0.04332585 | 7.031E-06  |
| 5035 | 0.04146148 | 6.7223E-06 | 3372 | 0.02327645 | 4.2255E-06 | 4402 | 0.04253402 | 6.9223E-06 |
| 5145 | 0.04118008 | 6.6047E-06 | 3444 | 0.023021   | 4.1706E-06 | 4498 | 0.04180402 | 6.8153E-06 |
| 5255 | 0.04033515 | 6.4891E-06 | 3516 | 0.02271243 | 4.1164E-06 | 4594 | 0.04120496 | 6.71E-06   |
| 5365 | 0.03941679 | 6.3755E-06 | 3588 | 0.02238618 | 4.0629E-06 | 4690 | 0.04051869 | 6.6062E-06 |
| 5475 | 0.03895271 | 6.2639E-06 | 3660 | 0.02214822 | 4.0101E-06 | 4786 | 0.03993237 | 6.5041E-06 |
| 5585 | 0.03804034 | 6.1543E-06 | 3732 | 0.02180571 | 3.958E-06  | 4882 | 0.03912332 | 6.4036E-06 |
| 5695 | 0.03741533 | 6.0465E-06 | 3804 | 0.02144567 | 3.9066E-06 | 4978 | 0.03865928 | 6.3046E-06 |
| 5805 | 0.03691029 | 5.9407E-06 | 3876 | 0.02117702 | 3.8559E-06 | 5074 | 0.03803867 | 6.2071E-06 |
| 5915 | 0.03619176 | 5.8367E-06 | 3948 | 0.02090275 | 3.8058E-06 | 5170 | 0.03744461 | 6.1112E-06 |
| 6025 | 0.03562462 | 5.7346E-06 | 4020 | 0.02064454 | 3.7563E-06 | 5266 | 0.03676695 | 6.0167E-06 |

|       |            |            |      |            |            |      |            |            |
|-------|------------|------------|------|------------|------------|------|------------|------------|
| 6135  | 0.03507563 | 5.6342E-06 | 4092 | 0.02038377 | 3.7075E-06 | 5362 | 0.036437   | 5.9237E-06 |
| 6245  | 0.03452231 | 5.5356E-06 | 4164 | 0.02015333 | 3.6593E-06 | 5458 | 0.03568023 | 5.8321E-06 |
| 6355  | 0.0337955  | 5.4387E-06 | 4236 | 0.01984666 | 3.6118E-06 | 5554 | 0.03509783 | 5.742E-06  |
| 6465  | 0.03312062 | 5.3435E-06 | 4308 | 0.01966963 | 3.5649E-06 | 5650 | 0.0345194  | 5.6532E-06 |
| 6575  | 0.03268689 | 5.25E-06   | 4380 | 0.0193841  | 3.5185E-06 | 5746 | 0.03409123 | 5.5658E-06 |
| 6685  | 0.03199762 | 5.1581E-06 | 4452 | 0.01912438 | 3.4728E-06 | 5842 | 0.03339965 | 5.4798E-06 |
| 6795  | 0.03147245 | 5.0678E-06 | 4524 | 0.01893331 | 3.4277E-06 | 5938 | 0.03298467 | 5.3951E-06 |
| 6905  | 0.03090707 | 4.9791E-06 | 4596 | 0.01861402 | 3.3832E-06 | 6034 | 0.03243389 | 5.3117E-06 |
| 7015  | 0.0306325  | 4.8919E-06 | 4668 | 0.01837794 | 3.3392E-06 | 6130 | 0.03215341 | 5.2295E-06 |
| 7125  | 0.02985554 | 4.8063E-06 | 4740 | 0.01814371 | 3.2958E-06 | 6226 | 0.03140474 | 5.1487E-06 |
| 7235  | 0.02932606 | 4.7222E-06 | 4812 | 0.01784768 | 3.253E-06  | 6322 | 0.03118669 | 5.0691E-06 |
| 7345  | 0.02890666 | 4.6395E-06 | 4884 | 0.01759718 | 3.2107E-06 | 6418 | 0.03072961 | 4.9907E-06 |
| 7455  | 0.02808159 | 4.5583E-06 | 4956 | 0.01738673 | 3.169E-06  | 6514 | 0.03023497 | 4.9136E-06 |
| 7565  | 0.02771917 | 4.4785E-06 | 5028 | 0.01724659 | 3.1278E-06 | 6610 | 0.02962242 | 4.8376E-06 |
| 7675  | 0.02760577 | 4.4001E-06 | 5100 | 0.01701162 | 3.0872E-06 | 6706 | 0.02916739 | 4.7629E-06 |
| 7785  | 0.02678102 | 4.3231E-06 | 5172 | 0.01681072 | 3.0471E-06 | 6802 | 0.02864467 | 4.6892E-06 |
| 7895  | 0.02640551 | 4.2474E-06 | 5244 | 0.01642709 | 3.0075E-06 | 6898 | 0.02843917 | 4.6167E-06 |
| 8005  | 0.02604493 | 4.1731E-06 | 5316 | 0.01629218 | 2.9684E-06 | 6994 | 0.02807104 | 4.5454E-06 |
| 8115  | 0.02556436 | 4.1001E-06 | 5388 | 0.01605669 | 2.9299E-06 | 7090 | 0.02700849 | 4.4751E-06 |
| 8225  | 0.02481401 | 4.0283E-06 | 5460 | 0.01592733 | 2.8918E-06 | 7186 | 0.02708294 | 4.4059E-06 |
| 8335  | 0.02457076 | 3.9578E-06 | 5532 | 0.01567249 | 2.8542E-06 | 7282 | 0.02674147 | 4.3378E-06 |
| 8445  | 0.02421052 | 3.8885E-06 | 5604 | 0.01548057 | 2.8171E-06 | 7378 | 0.02643192 | 4.2708E-06 |
| 8555  | 0.02366539 | 3.8204E-06 | 5676 | 0.0153162  | 2.7805E-06 | 7474 | 0.02595719 | 4.2047E-06 |
| 8665  | 0.02326236 | 3.7536E-06 | 5748 | 0.01514933 | 2.7444E-06 | 7570 | 0.02509292 | 4.1397E-06 |
| 8775  | 0.02259343 | 3.6879E-06 | 5820 | 0.01509681 | 2.7087E-06 | 7666 | 0.02526008 | 4.0757E-06 |
| 8885  | 0.02248905 | 3.6233E-06 | 5892 | 0.01473934 | 2.6735E-06 | 7762 | 0.02467605 | 4.0127E-06 |
| 8995  | 0.02210804 | 3.5599E-06 | 5964 | 0.01453088 | 2.6388E-06 | 7858 | 0.02422657 | 3.9507E-06 |
| 9105  | 0.02158571 | 3.4976E-06 | 6036 | 0.01432548 | 2.6045E-06 | 7954 | 0.02401669 | 3.8896E-06 |
| 9215  | 0.02109331 | 3.4364E-06 | 6108 | 0.01420723 | 2.5707E-06 | 8050 | 0.02365114 | 3.8295E-06 |
| 9325  | 0.02099461 | 3.3762E-06 | 6180 | 0.01394602 | 2.5373E-06 | 8146 | 0.02326022 | 3.7703E-06 |
| 9435  | 0.02041025 | 3.3171E-06 | 6252 | 0.01376869 | 2.5043E-06 | 8242 | 0.02284198 | 3.712E-06  |
| 9545  | 0.02021492 | 3.2591E-06 | 6324 | 0.01357771 | 2.4718E-06 | 8338 | 0.02267472 | 3.6546E-06 |
| 9655  | 0.01983015 | 3.202E-06  | 6396 | 0.01348688 | 2.4397E-06 | 8434 | 0.02238942 | 3.5981E-06 |
| 9765  | 0.01965542 | 3.146E-06  | 6468 | 0.0132963  | 2.408E-06  | 8530 | 0.02192986 | 3.5425E-06 |
| 9875  | 0.01930624 | 3.0909E-06 | 6540 | 0.01307979 | 2.3767E-06 | 8626 | 0.02118587 | 3.4878E-06 |
| 9985  | 0.0187689  | 3.0368E-06 | 6612 | 0.01289793 | 2.3458E-06 | 8722 | 0.02148776 | 3.4338E-06 |
| 10095 | 0.01872433 | 2.9837E-06 | 6684 | 0.01276855 | 2.3153E-06 | 8818 | 0.02113274 | 3.3808E-06 |
| 10205 | 0.01826945 | 2.9314E-06 | 6756 | 0.01262979 | 2.2852E-06 | 8914 | 0.02053143 | 3.3285E-06 |
| 10315 | 0.01802513 | 2.8801E-06 | 6828 | 0.01243491 | 2.2555E-06 | 9010 | 0.02029669 | 3.277E-06  |
| 10425 | 0.01748131 | 2.8297E-06 | 6900 | 0.01222184 | 2.2262E-06 | 9106 | 0.02025058 | 3.2264E-06 |
| 10535 | 0.01732422 | 2.7802E-06 | 6972 | 0.01209711 | 2.1973E-06 | 9202 | 0.01966527 | 3.1765E-06 |
| 10645 | 0.01711357 | 2.7315E-06 | 7044 | 0.01192834 | 2.1688E-06 | 9298 | 0.01954714 | 3.1274E-06 |

|       |            |            |       |            |            |       |            |            |
|-------|------------|------------|-------|------------|------------|-------|------------|------------|
| 10755 | 0.01685301 | 2.6837E-06 | 7116  | 0.01174076 | 2.1406E-06 | 9394  | 0.01915771 | 3.0791E-06 |
| 10865 | 0.01640045 | 2.6367E-06 | 7188  | 0.01164536 | 2.1128E-06 | 9490  | 0.01895205 | 3.0315E-06 |
| 10975 | 0.0161784  | 2.5906E-06 | 7260  | 0.01143508 | 2.0853E-06 | 9586  | 0.01835687 | 2.9846E-06 |
| 11085 | 0.0160666  | 2.5452E-06 | 7332  | 0.01132742 | 2.0582E-06 | 9682  | 0.01822127 | 2.9385E-06 |
| 11195 | 0.01567501 | 2.5007E-06 | 7404  | 0.01125681 | 2.0315E-06 | 9778  | 0.01817005 | 2.893E-06  |
| 11305 | 0.01535039 | 2.4569E-06 | 7476  | 0.01106774 | 2.0051E-06 | 9874  | 0.01803626 | 2.8483E-06 |
| 11415 | 0.01510682 | 2.4139E-06 | 7548  | 0.01082666 | 1.979E-06  | 9970  | 0.01754317 | 2.8043E-06 |
| 11525 | 0.01472943 | 2.3717E-06 | 7620  | 0.0107573  | 1.9533E-06 | 10066 | 0.0173756  | 2.7609E-06 |
| 11635 | 0.0145286  | 2.3301E-06 | 7692  | 0.01068514 | 1.9279E-06 | 10162 | 0.01711258 | 2.7182E-06 |
| 11745 | 0.01417467 | 2.2894E-06 | 7764  | 0.01044584 | 1.9029E-06 | 10258 | 0.01687552 | 2.6762E-06 |
| 11855 | 0.01400347 | 2.2493E-06 | 7836  | 0.01030163 | 1.8782E-06 | 10354 | 0.01655318 | 2.6349E-06 |
| 11965 | 0.01384633 | 2.2099E-06 | 7908  | 0.01014946 | 1.8538E-06 | 10450 | 0.01640194 | 2.5941E-06 |
| 12075 | 0.01359842 | 2.1712E-06 | 7980  | 0.01006751 | 1.8297E-06 | 10546 | 0.01608281 | 2.554E-06  |
| 12185 | 0.0132967  | 2.1332E-06 | 8052  | 0.00997763 | 1.8059E-06 | 10642 | 0.01607105 | 2.5145E-06 |
| 12295 | 0.01324099 | 2.0959E-06 | 8124  | 0.00988202 | 1.7824E-06 | 10738 | 0.0157502  | 2.4757E-06 |
| 12405 | 0.01293551 | 2.0592E-06 | 8196  | 0.00966051 | 1.7593E-06 | 10834 | 0.01532313 | 2.4374E-06 |
| 12515 | 0.01269546 | 2.0232E-06 | 8268  | 0.00946291 | 1.7364E-06 | 10930 | 0.01527101 | 2.3997E-06 |
| 12625 | 0.01248756 | 1.9878E-06 | 8340  | 0.00942679 | 1.7139E-06 | 11026 | 0.01511301 | 2.3626E-06 |
| 12735 | 0.0124077  | 1.953E-06  | 8412  | 0.00928386 | 1.6916E-06 | 11122 | 0.01476242 | 2.3261E-06 |
| 12845 | 0.01192045 | 1.9188E-06 | 8484  | 0.00921287 | 1.6696E-06 | 11218 | 0.01455023 | 2.2901E-06 |
| 12955 | 0.01197824 | 1.8852E-06 | 8556  | 0.00910574 | 1.6479E-06 | 11314 | 0.01436593 | 2.2547E-06 |
| 13065 | 0.01163449 | 1.8522E-06 | 8628  | 0.00895359 | 1.6265E-06 | 11410 | 0.01412822 | 2.2199E-06 |
| 13175 | 0.01148838 | 1.8198E-06 | 8700  | 0.00874737 | 1.6054E-06 | 11506 | 0.0140362  | 2.1856E-06 |
| 13285 | 0.01125255 | 1.7879E-06 | 8772  | 0.00873709 | 1.5845E-06 | 11602 | 0.01382394 | 2.1518E-06 |
| 13395 | 0.01123735 | 1.7566E-06 | 8844  | 0.0085986  | 1.5639E-06 | 11698 | 0.01352234 | 2.1185E-06 |
| 13505 | 0.01107229 | 1.7259E-06 | 8916  | 0.00853619 | 1.5436E-06 | 11794 | 0.01341376 | 2.0858E-06 |
| 13615 | 0.01080857 | 1.6957E-06 | 8988  | 0.00838307 | 1.5236E-06 | 11890 | 0.01330207 | 2.0535E-06 |
| 13725 | 0.01051673 | 1.666E-06  | 9060  | 0.00823744 | 1.5038E-06 | 11986 | 0.01302328 | 2.0218E-06 |
| 13835 | 0.01031202 | 1.6368E-06 | 9132  | 0.00815492 | 1.4842E-06 | 12082 | 0.01283747 | 1.9905E-06 |
| 13945 | 0.01016257 | 1.6082E-06 | 9204  | 0.00807143 | 1.4649E-06 | 12178 | 0.01278151 | 1.9598E-06 |
| 14055 | 0.01005201 | 1.58E-06   | 9276  | 0.00799075 | 1.4459E-06 | 12274 | 0.01256611 | 1.9295E-06 |
| 14165 | 0.00979688 | 1.5524E-06 | 9348  | 0.00787488 | 1.4271E-06 | 12370 | 0.01237149 | 1.8996E-06 |
| 14275 | 0.00967317 | 1.5252E-06 | 9420  | 0.00780699 | 1.4086E-06 | 12466 | 0.0122478  | 1.8703E-06 |
| 14385 | 0.00943944 | 1.4985E-06 | 9492  | 0.00757452 | 1.3903E-06 | 12562 | 0.01203571 | 1.8414E-06 |
| 14495 | 0.0093159  | 1.4723E-06 | 9564  | 0.00753959 | 1.3722E-06 | 12658 | 0.01184698 | 1.8129E-06 |
| 14605 | 0.00929576 | 1.4465E-06 | 9636  | 0.00742971 | 1.3544E-06 | 12754 | 0.01173514 | 1.7849E-06 |
| 14715 | 0.00904769 | 1.4212E-06 | 9708  | 0.00734602 | 1.3368E-06 | 12850 | 0.0114668  | 1.7573E-06 |
| 14825 | 0.00892488 | 1.3963E-06 | 9780  | 0.00725522 | 1.3194E-06 | 12946 | 0.01138162 | 1.7301E-06 |
| 14935 | 0.00880381 | 1.3719E-06 | 9852  | 0.00714602 | 1.3023E-06 | 13042 | 0.01129391 | 1.7034E-06 |
| 15045 | 0.00866161 | 1.3479E-06 | 9924  | 0.00705136 | 1.2854E-06 | 13138 | 0.01121509 | 1.677E-06  |
| 15155 | 0.00858018 | 1.3243E-06 | 9996  | 0.00699156 | 1.2687E-06 | 13234 | 0.01094386 | 1.6511E-06 |
| 15265 | 0.00834106 | 1.3011E-06 | 10068 | 0.00689693 | 1.2522E-06 | 13330 | 0.01085443 | 1.6256E-06 |

|       |            |            |       |            |            |       |            |            |
|-------|------------|------------|-------|------------|------------|-------|------------|------------|
| 15375 | 0.00819412 | 1.2783E-06 | 10140 | 0.00680307 | 1.2359E-06 | 13426 | 0.01069589 | 1.6004E-06 |
| 15485 | 0.00811173 | 1.2559E-06 | 10212 | 0.00677861 | 1.2198E-06 | 13522 | 0.01054991 | 1.5757E-06 |
| 15595 | 0.00781261 | 1.234E-06  | 10284 | 0.00669625 | 1.204E-06  | 13618 | 0.01041327 | 1.5514E-06 |
| 15705 | 0.00780446 | 1.2124E-06 | 10356 | 0.00655807 | 1.1884E-06 | 13714 | 0.01026298 | 1.5274E-06 |
| 15815 | 0.00774311 | 1.1911E-06 | 10428 | 0.00650409 | 1.1729E-06 | 13810 | 0.01015755 | 1.5038E-06 |
| 15925 | 0.00760936 | 1.1703E-06 | 10500 | 0.00633556 | 1.1577E-06 | 13906 | 0.01010122 | 1.4805E-06 |
| 16035 | 0.00753223 | 1.1498E-06 | 10572 | 0.00631243 | 1.1426E-06 | 14002 | 0.00991543 | 1.4576E-06 |
| 16145 | 0.00724486 | 1.1297E-06 | 10644 | 0.00628731 | 1.1278E-06 | 14098 | 0.00980836 | 1.4351E-06 |
| 16255 | 0.00719087 | 1.1099E-06 | 10716 | 0.00612758 | 1.1131E-06 | 14194 | 0.00964511 | 1.4129E-06 |
| 16365 | 0.00727972 | 1.0905E-06 | 10788 | 0.00603118 | 1.0987E-06 | 14290 | 0.00952332 | 1.3911E-06 |
| 16475 | 0.00691681 | 1.0714E-06 | 10860 | 0.00591613 | 1.0844E-06 | 14386 | 0.00945028 | 1.3696E-06 |
| 16585 | 0.00678051 | 1.0526E-06 | 10932 | 0.00593787 | 1.0703E-06 | 14482 | 0.00930143 | 1.3484E-06 |
| 16695 | 0.00672161 | 1.0342E-06 |       |            |            |       |            |            |
| 16805 | 0.00656727 | 1.0161E-06 |       |            |            |       |            |            |
| 16915 | 0.0064664  | 9.9833E-07 |       |            |            |       |            |            |
| 17025 | 0.00633183 | 9.8085E-07 |       |            |            |       |            |            |
| 17135 | 0.00625587 | 9.6368E-07 |       |            |            |       |            |            |
| 17245 | 0.00624239 | 9.4682E-07 |       |            |            |       |            |            |
| 17355 | 0.00607539 | 9.3024E-07 |       |            |            |       |            |            |
| 17465 | 0.0060288  | 9.1396E-07 |       |            |            |       |            |            |
| 17575 | 0.00593392 | 8.9796E-07 |       |            |            |       |            |            |
| 17685 | 0.00579043 | 8.8225E-07 |       |            |            |       |            |            |
| 17795 | 0.00577409 | 8.668E-07  |       |            |            |       |            |            |
| 17905 | 0.00564857 | 8.5163E-07 |       |            |            |       |            |            |
| 18015 | 0.00563546 | 8.3673E-07 |       |            |            |       |            |            |
| 18125 | 0.00538907 | 8.2208E-07 |       |            |            |       |            |            |
| 18235 | 0.00538119 | 8.0769E-07 |       |            |            |       |            |            |
| 18345 | 0.00517893 | 7.9355E-07 |       |            |            |       |            |            |
| 18455 | 0.00518702 | 7.7966E-07 |       |            |            |       |            |            |
| 18565 | 0.00503583 | 7.6602E-07 |       |            |            |       |            |            |
| 18675 | 0.0050546  | 7.5261E-07 |       |            |            |       |            |            |
| 18785 | 0.0047302  | 7.3944E-07 |       |            |            |       |            |            |
| 18895 | 0.00469701 | 7.2649E-07 |       |            |            |       |            |            |
| 19005 | 0.00481653 | 7.1378E-07 |       |            |            |       |            |            |
| 19115 | 0.00472644 | 7.0128E-07 |       |            |            |       |            |            |
| 19225 | 0.00469    | 6.8901E-07 |       |            |            |       |            |            |
| 19335 | 0.00455782 | 6.7695E-07 |       |            |            |       |            |            |
| 19445 | 0.00440883 | 6.651E-07  |       |            |            |       |            |            |
| 19555 | 0.0043486  | 6.5346E-07 |       |            |            |       |            |            |
| 19665 | 0.00449484 | 6.4202E-07 |       |            |            |       |            |            |
| 19775 | 0.0042381  | 6.3078E-07 |       |            |            |       |            |            |
| 19885 | 0.00440942 | 6.1974E-07 |       |            |            |       |            |            |

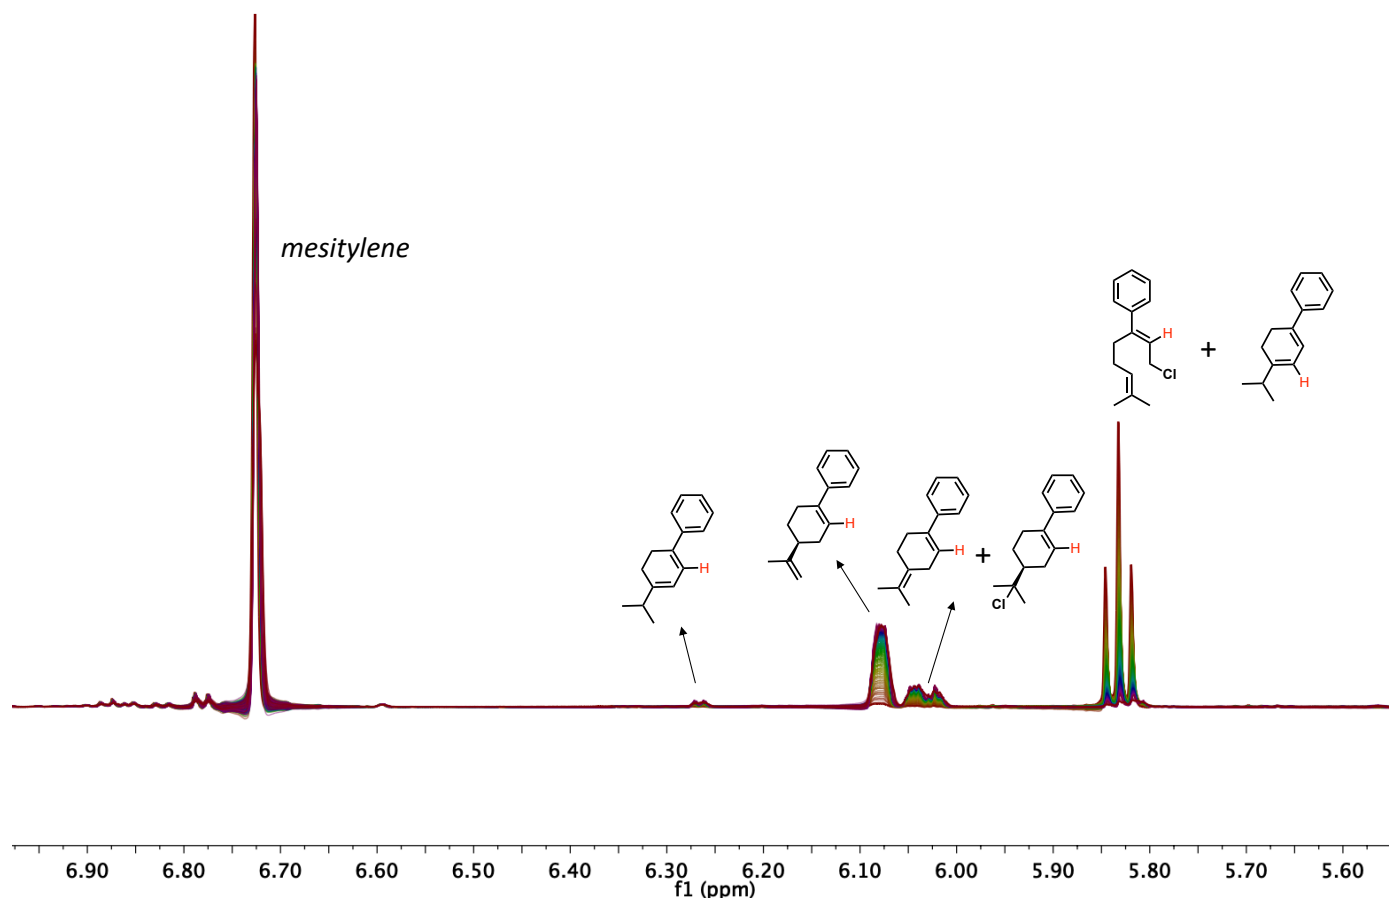

**Figure S20.** Representative  $^1\text{H}$  NMR traces for cyclization of **1b** catalyzed by **7b**.

#### Determination of order in catalyst

The rate of cyclization of substrate **1b** catalyzed by **7b** was assessed at various concentrations of **7b** ( $[\mathbf{7b}]_{\text{T}} = 5 \text{ mM}, 10 \text{ mM}, \text{ and } 15 \text{ mM}$  respectively) with 1.15 eq. TMS-diazomethane as the base. Data acquisition and analysis was the same as described for same and different excess experiments (see above). All kinetics runs were conducted in duplicate. First order observed rate constants ( $k_{\text{obs}}$ ) were extracted from the slopes of rate vs concentration plots following least-squares fitting. The negative natural logarithms of these values were plotted against the negative natural logarithms of total catalyst concentration, and from this, catalyst order was determined by linear least-squares fitting of the data. The slope of this linear fit was used to determine the apparent order in  $[\mathbf{7b}] = 1.19 \pm 0.04$ . For these experiments,  $[\mathbf{1b}]_0 = 0.1 \text{ M}$ ,  $[\text{TMS-diazomethane}] = 0.115 \text{ M}$ , and  $[\mathbf{7b}]_{\text{T}} = 0.005\text{-}0.015 \text{ M}$ .



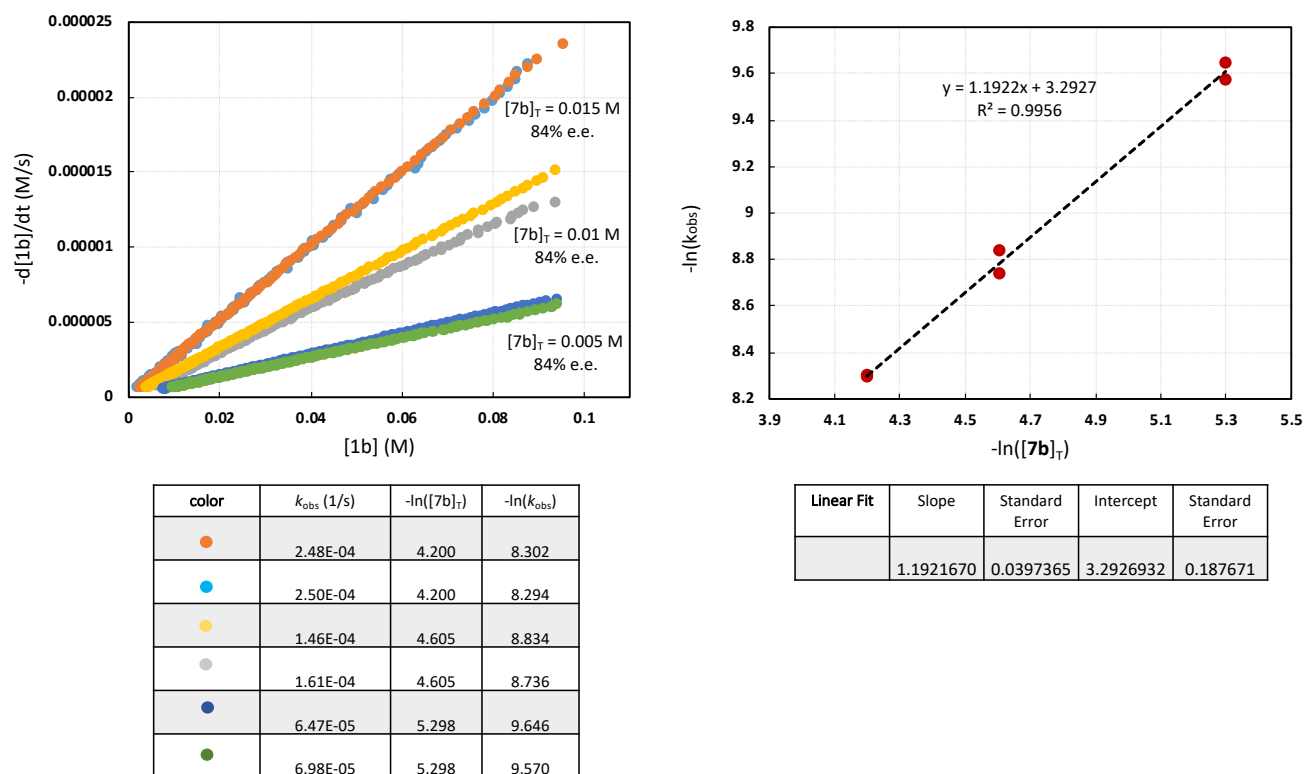

**Figure S21.** Reaction profiles for the cyclization of substrate **1b** with various loadings of catalyst **7b** (left). Determination of observed order (right).

### 9.3 Correlation of catalyst arene properties with reaction rate and enantioselectivity

Reaction rate and enantioselectivity of the cyclization reaction of **1b** were seen to be correlated for a series of four hydrogen bond donor catalysts bearing different aryl substituents (catalysts **7a-7d**). By plotting the negative natural logarithm of the rate constant corresponding to each of the enantiomeric pathways ( $k_{maj}$  and  $k_{min}$ ) against the natural logarithm of the enantiomeric ratio (e.r.), good linear correlations were observed for both pathways indicating that both are stabilized by the presence of the catalyst. The slope of the least squares linear fit for the major pathway is larger than that of the minor pathway, indicating that it is stabilized to a greater extent.

The observed rate constants for each reaction were determined through reaction progress kinetic analysis as described previously in section 9.2. Reactions were conducted with the following concentrations:  $[1b]_0 = 0.1$  M,  $[TMS\text{-}diazomethane] = 0.115$  M, and  $[7a-d]_T = 0.01$  M using a 6:1 (v/v) blend of  $C_6D_{12}$  and  $CD_2Cl_2$ .

Substrate **1b** does not undergo a measurable background cyclization reaction; therefore, the observed rate constant ( $k_{obs}$ ) in the presence of chiral hydrogen bond donor catalyst is a sum of the rate constants corresponding to the major and minor enantiomeric pathways:

$$k_{obs} = k_{maj} + k_{min}$$

Using the Eyring equation (in which the transmission coefficient is assumed to be unity,  $K_B$  is the Boltzmann constant,  $R$  is the gas constant,  $h$  is Planck's constant, and  $T$  is temperature), the expression becomes:

$$k = \left(\frac{K_B T}{h}\right) \left(e^{\frac{-\Delta G^\ddagger}{RT}}\right) \text{ (Eyring equation)}$$

$$k_{obs} = \left(\frac{K_B T}{h}\right) \left(e^{\frac{-\Delta G_{maj}^\ddagger}{RT}} + e^{\frac{-\Delta G_{min}^\ddagger}{RT}}\right)$$

$$\text{let } \left(\frac{k_B T}{h}\right) = a$$

$$k_{obs} = a \left( e^{\frac{-\Delta G_{maj}^\ddagger}{RT}} + e^{\frac{-\Delta G_{min}^\ddagger}{RT}} \right)$$

$\Delta\Delta G^\ddagger$  can be related to *e.r.* (expressed as a ratio of major to minor enantiomeric products) from the following expression where *R* is the gas constant and *T* is temperature:

$$\Delta\Delta G^\ddagger = -RT \ln(e.r.)$$

$$-\Delta G_{maj}^\ddagger = RT \ln(e.r.) - \Delta G_{min}^\ddagger$$

Hence,  $k_{obs}$  and  $\Delta G_{min}^\ddagger$  can be related to the *e.r.* of the reaction:

$$k_{obs} = a \left( e^{\frac{RT \ln(e.r.) - \Delta G_{min}^\ddagger}{RT}} + e^{\frac{-\Delta G_{min}^\ddagger}{RT}} \right)$$

$$\left( k_{obs}/a \right) - e^{\frac{-\Delta G_{min}^\ddagger}{RT}} = e^{\frac{RT \ln(e.r.) - \Delta G_{min}^\ddagger}{RT}} = \frac{e^{\ln(e.r.)}}{e^{\frac{\Delta G_{min}^\ddagger}{RT}}}$$

$$e^{\frac{\Delta G_{min}^\ddagger}{RT}} (k_{obs}/a) - 1 = e.r.$$

$$\Delta G_{min}^\ddagger = RT \ln \left[ (e.r. + 1) \left( a/k_{obs} \right) \right]$$

Using a similar mathematical approach,  $\Delta G_{maj}^\ddagger$  can also be related to *e.r.* through the following expression:

$$\Delta G_{maj}^\ddagger = RT \ln \left[ \left( \frac{1}{e.r.} + 1 \right) \left( a/k_{obs} \right) \right]$$

These expressions for  $\Delta G_{maj}^\ddagger$  and  $\Delta G_{min}^\ddagger$  were used to derive rate constants  $k_{maj}$  and  $k_{min}$  corresponding to each enantiomeric pathway using the Eyring equation (with  $R = 1.987E-03$  kcal/(K\**mol*) and  $T = 298$  K) and the observed rate constant  $k_{obs}$  measured using the same kinetics techniques described in section 9. This was performed either in duplicate or triplicate for each of the four hydrogen bond donor catalysts surveyed. The results of this analysis for catalysts **7a-7d** are shown below. The plot in Figure 5 was generated using the average values for  $\ln(k_{maj})$  and  $\ln(k_{min})$ . Note: under these conditions, *e.e.* values are slightly lower than those reported in section 5.2 due to the presence of  $CD_2Cl_2$  in a 1:6 (v/v) ratio with  $C_6D_{12}$  (see section 9.2).

| Catalyst    | Run | $k_{obs}$ (1/s) | $k_{maj}$ (1/s) | $k_{min}$ (1/s) | $\ln(k_{maj})$ | $\ln(k_{min})$ |
|-------------|-----|-----------------|-----------------|-----------------|----------------|----------------|
| 2Phen (7a)  | 1   | 3.020E-04       | 2.794E-04       | 2.265E-05       | -8.183045082   | -10.69535071   |
|             | 2   | 2.330E-04       | 2.155E-04       | 1.748E-05       | -8.442433646   | -10.95473927   |
|             | 3   | 2.780E-04       | 2.572E-04       | 2.085E-05       | -8.265850986   | -10.77815661   |
| 2Nap (7b)   | 1   | 1.456E-04       | 1.340E-04       | 1.165E-05       | -8.918029031   | -11.36037607   |
|             | 2   | 1.607E-04       | 1.478E-04       | 1.286E-05       | -8.819352894   | -11.26169993   |
| 3Phen (7c)  | 1   | 8.790E-05       | 7.428E-05       | 1.362E-05       | -9.507729405   | -11.20364092   |
|             | 2   | 8.416E-05       | 7.112E-05       | 1.304E-05       | -9.551209461   | -11.24712097   |
|             | 3   | 8.630E-05       | 7.292E-05       | 1.338E-05       | -9.526099611   | -11.22201112   |
| Phenyl (7d) | 1   | 4.976E-05       | 3.977E-05       | 9.942E-06       | -10.13244799   | -11.51874235   |
|             | 2   | 4.971E-05       | 3.981E-05       | 9.952E-06       | -10.13144266   | -11.51773702   |

| Catalyst    | ln(e.r.)    | Average ln( $k_{maj}$ ) | Stdev.     | Average ln( $k_{min}$ ) | Stdev.      |
|-------------|-------------|-------------------------|------------|-------------------------|-------------|
| 2Phen (7a)  | 2.512305624 | -8.297109905            | 0.13248942 | -10.80941553            | 0.132489421 |
| 2Nap (7b)   | 2.442347035 | -8.868690963            | 0.06977457 | -11.311038              | 0.069774566 |
| 3Phen (7c)  | 1.69591151  | -9.528346159            | 0.02182691 | -11.22425767            | 0.021826911 |
| Phenyl (7d) | 1.386294361 | -10.13194533            | 0.00071087 | -11.51823969            | 0.000710874 |

## 10. Isothermal Titration Calorimetry

A Nano ITC instrument (TA instruments) with a standard volume cell (1.0 mL) was used to collect all data at room temperature. Experiments were performed by charging both the sample and reference cells of the instrument with 1.0 mL of a 6:1 (v/v) mixture of cyclohexane and dichloromethane, the same solvent combination used for kinetics experiments (see section 9). Both solvents were distilled prior to use. A 250  $\mu\text{L}$  titration burette was charged with a 10 mM stock solution of catalyst **7b** (the same concentration of catalyst under the catalytic reaction conditions). This concentrated stock solution was diluted in the sample cell over 25 injections of 10  $\mu\text{L}$  each, with 200 second spacing between injections. Stirring was kept constant throughout the course of experiments (200 rpm). The volume for the first injection was kept as small as possible and was not considered in the subsequent data analysis due to errors associated with instrument calibration.

Data processing and analysis was performed using the program Nano Analyze (downloaded from the TA instruments website) and used according to the instructions provided. After integration of both the sample and the blank measurements, the heat release associated with solvent dilution was found to be negligible and was not considered in the analysis. The data was then fit to a dimer dissociation model and from this, thermodynamic parameters ( $K_{\text{diss}}$  and  $K_{\text{dim}}$ ) could be extracted. This analysis was performed in duplicate for catalyst **7b**. The results are summarized below:

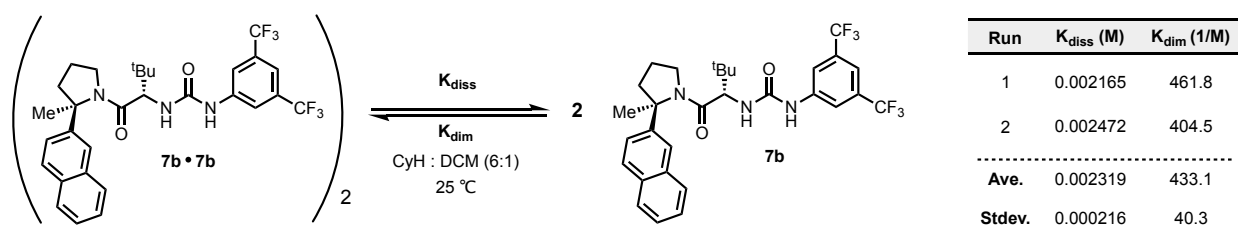

**Figure S22.** Measurement of  $K_{\text{diss}}$  and  $K_{\text{dim}}$  using ITC.

An average  $K_{\text{dim}}$  of  $433 \pm 40 \text{ M}^{-1}$  indicates that under catalytic concentrations (total catalyst concentration = 10 mM), catalyst **7b** exists primarily as a resting state dimer (71.3% of catalyst molecules are dimerized).

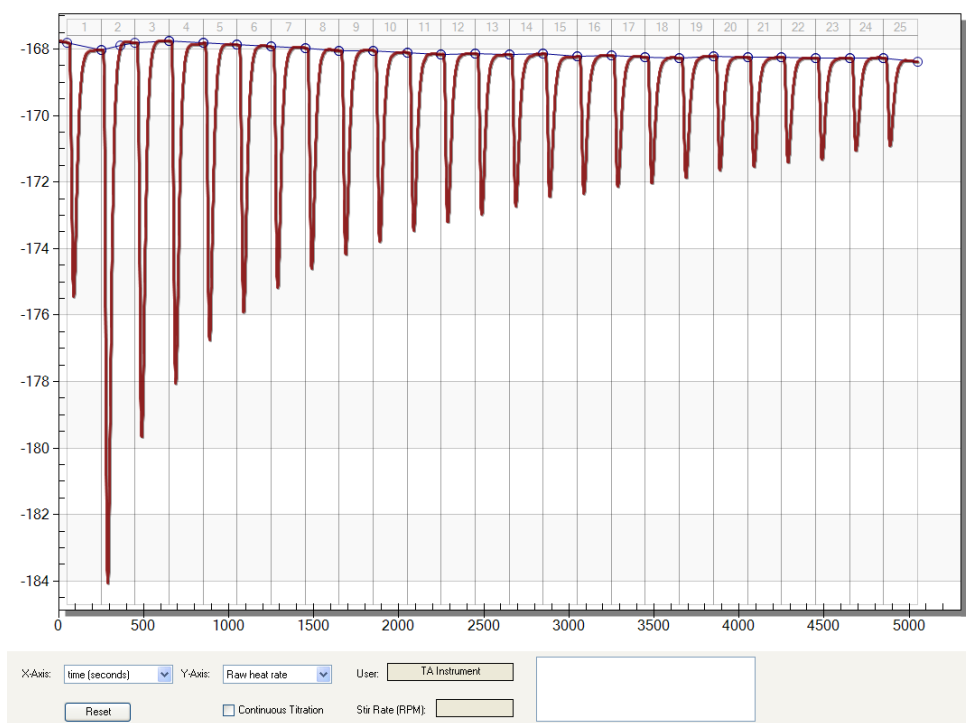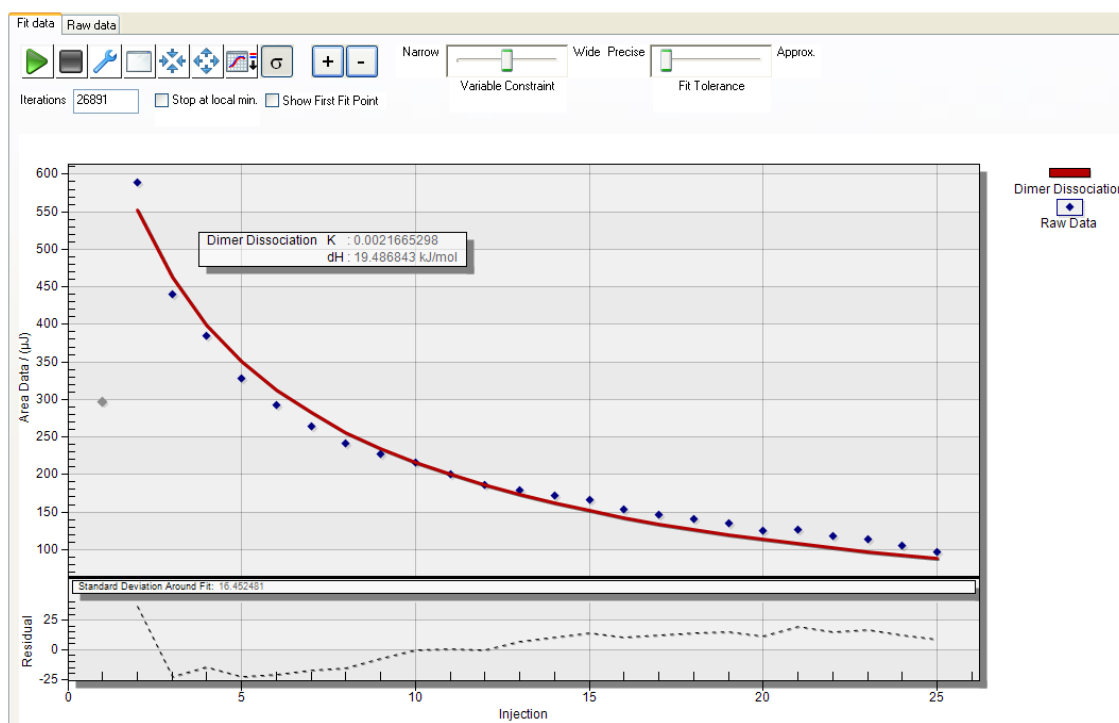

**Figure S23.** Trial 1: Above: raw heat trace from dilution of 10 mM solution of **7b**. Below: curve fitting of the heat data to determine  $K_{diss}$

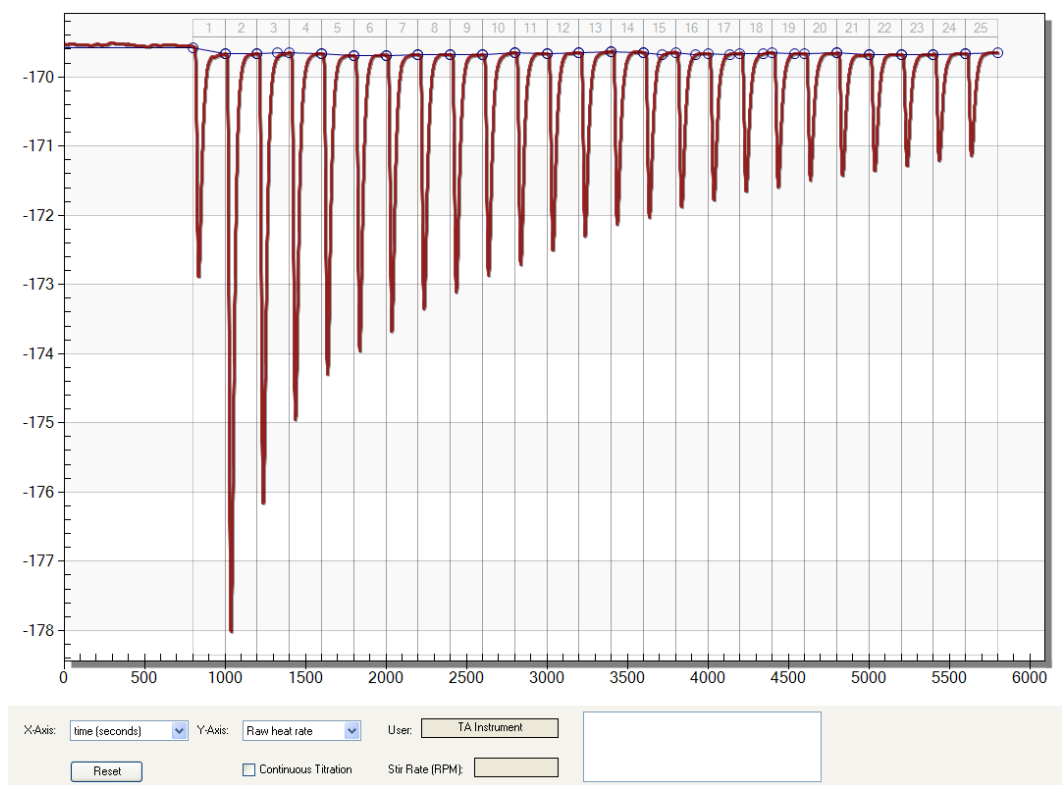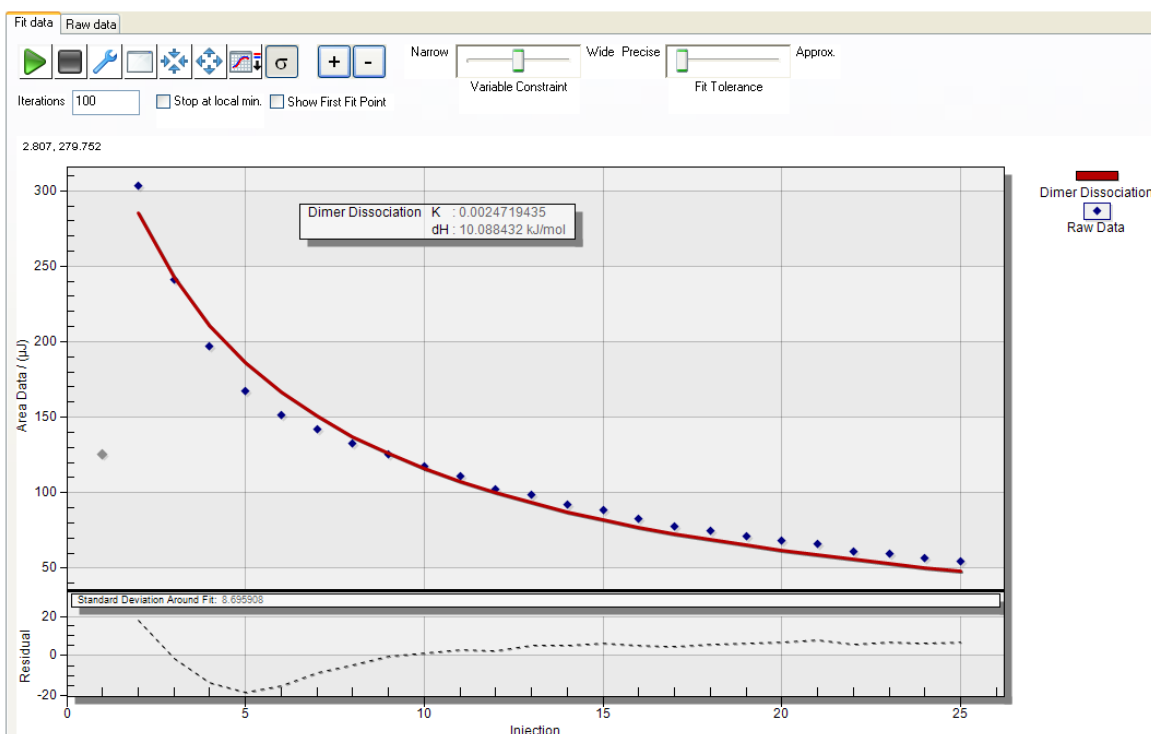

**Figure S24.** Trial 2: Above: raw heat trace from dilution of 10 mM solution of **7b**. Below: curve fitting of the heat data to determine  $K_{diss}$

# 11. <sup>1</sup>H, <sup>13</sup>C, and <sup>19</sup>F NMR Spectra

<sup>1</sup>H NMR, CDCl<sub>3</sub>, 500 MHz

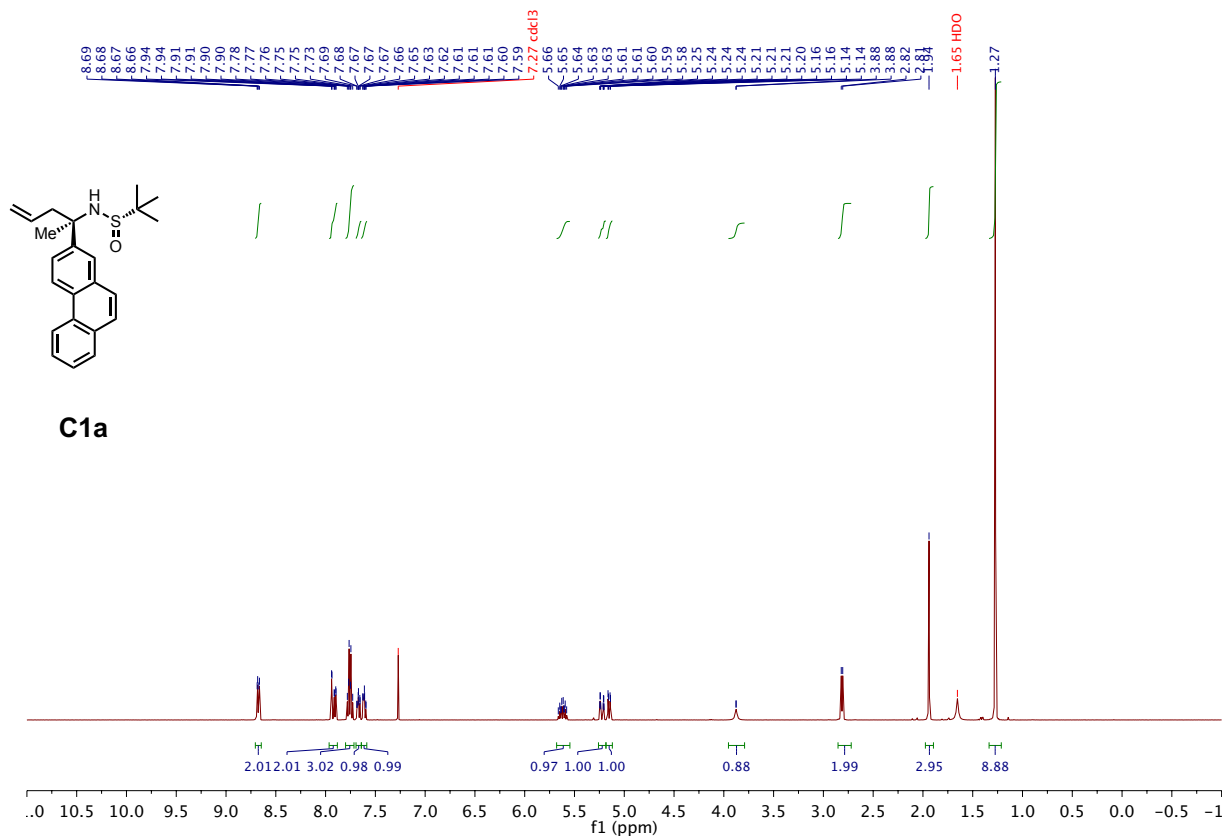

<sup>13</sup>C NMR, CDCl<sub>3</sub>, 126 MHz

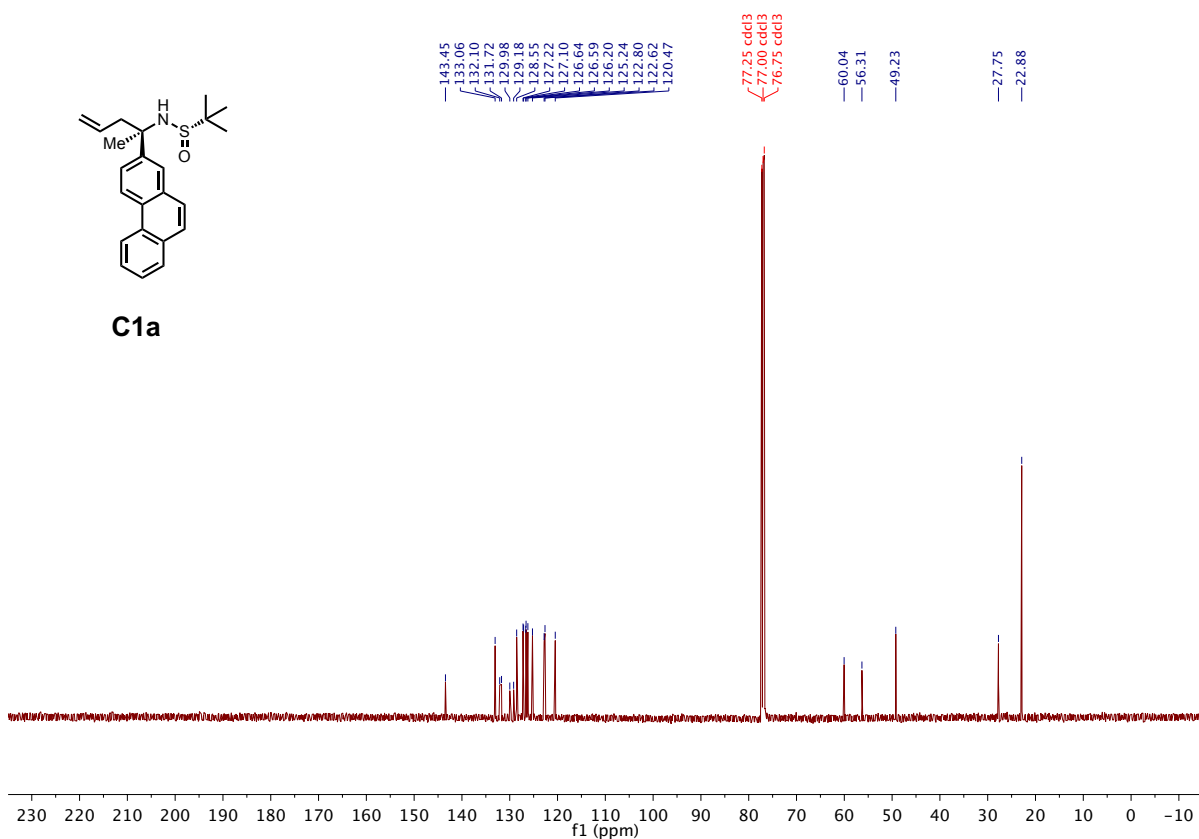

$^1\text{H}$  NMR,  $\text{CDCl}_3$ , 500 MHz

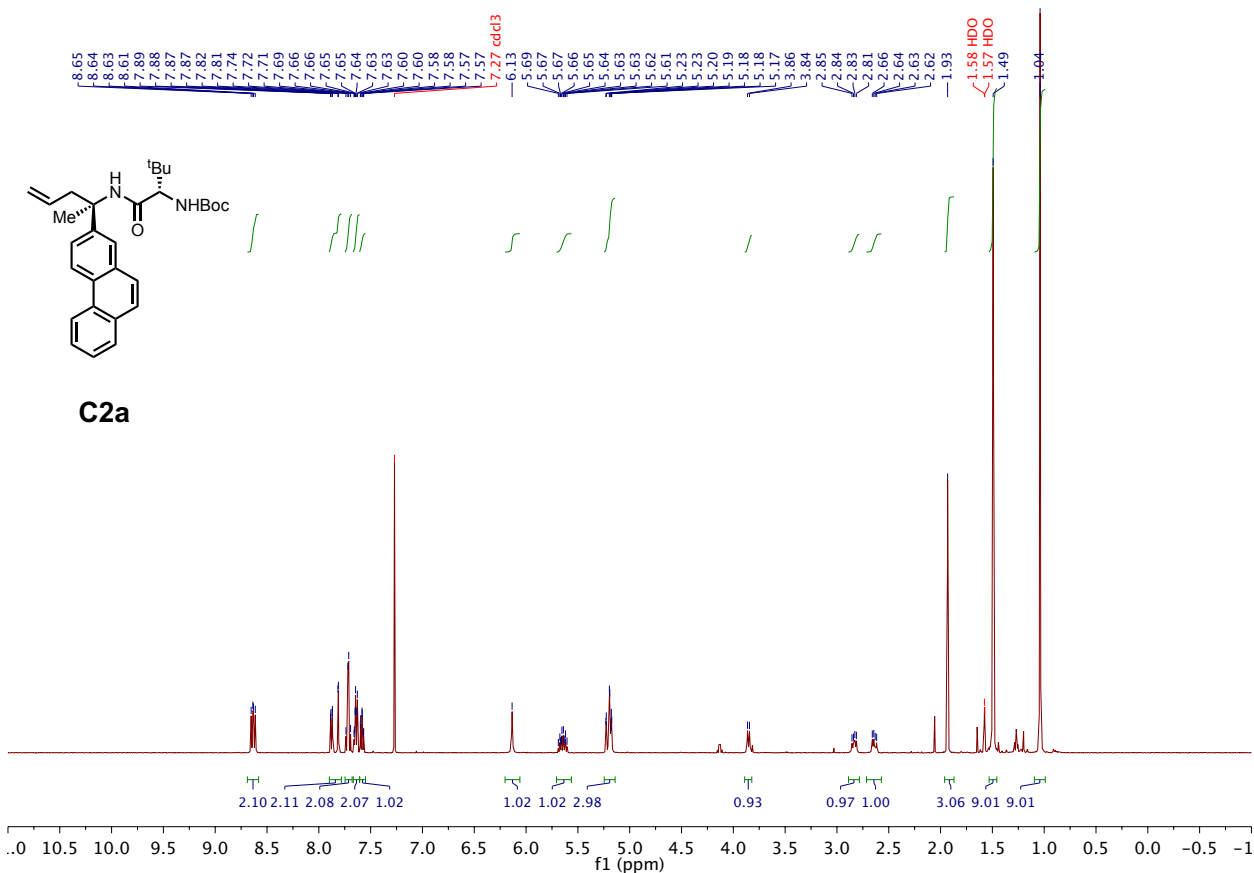

$^{13}\text{C}$  NMR,  $\text{CDCl}_3$ , 126 MHz

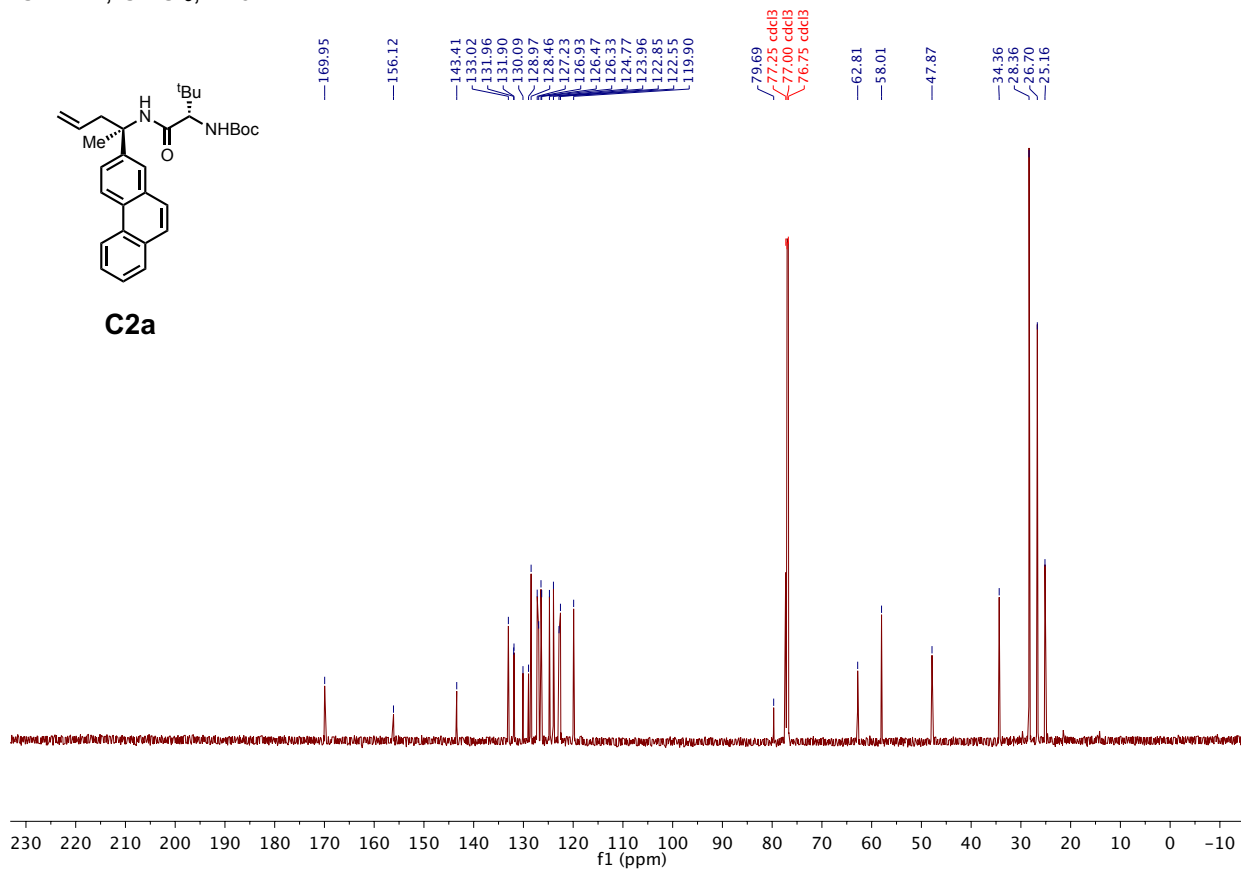

<sup>1</sup>H NMR, CDCl<sub>3</sub>, 500 MHz

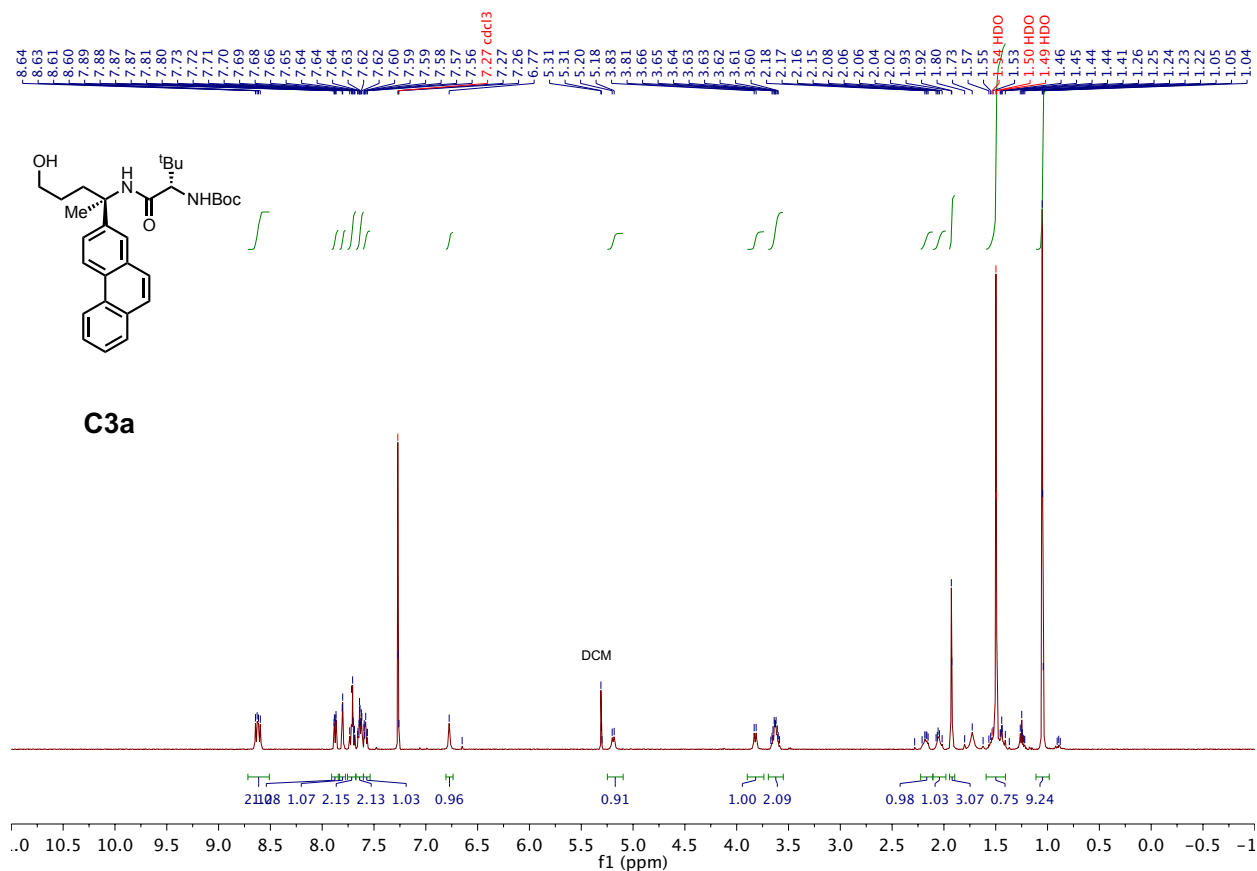

<sup>13</sup>C NMR, CDCl<sub>3</sub>, 126 MHz

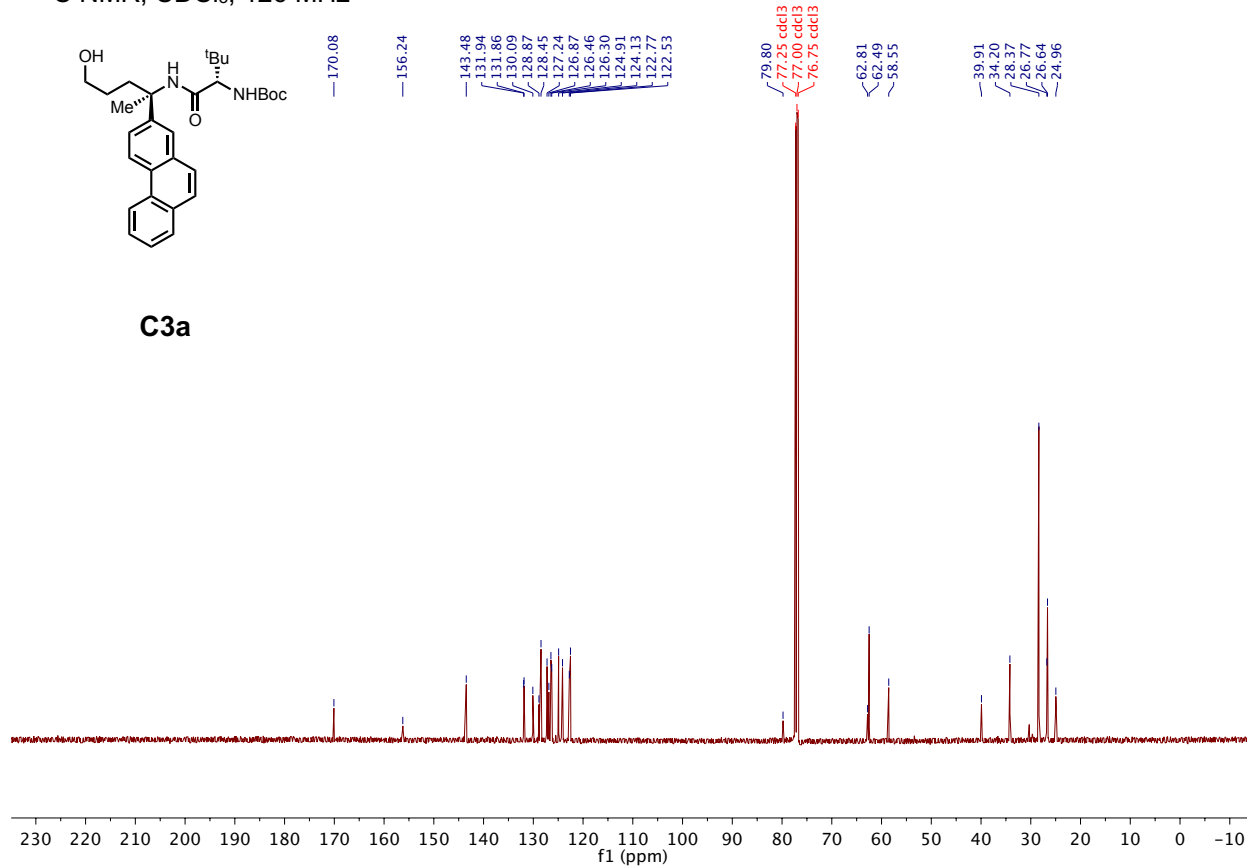



<sup>1</sup>H NMR, CDCl<sub>3</sub>, 500 MHz

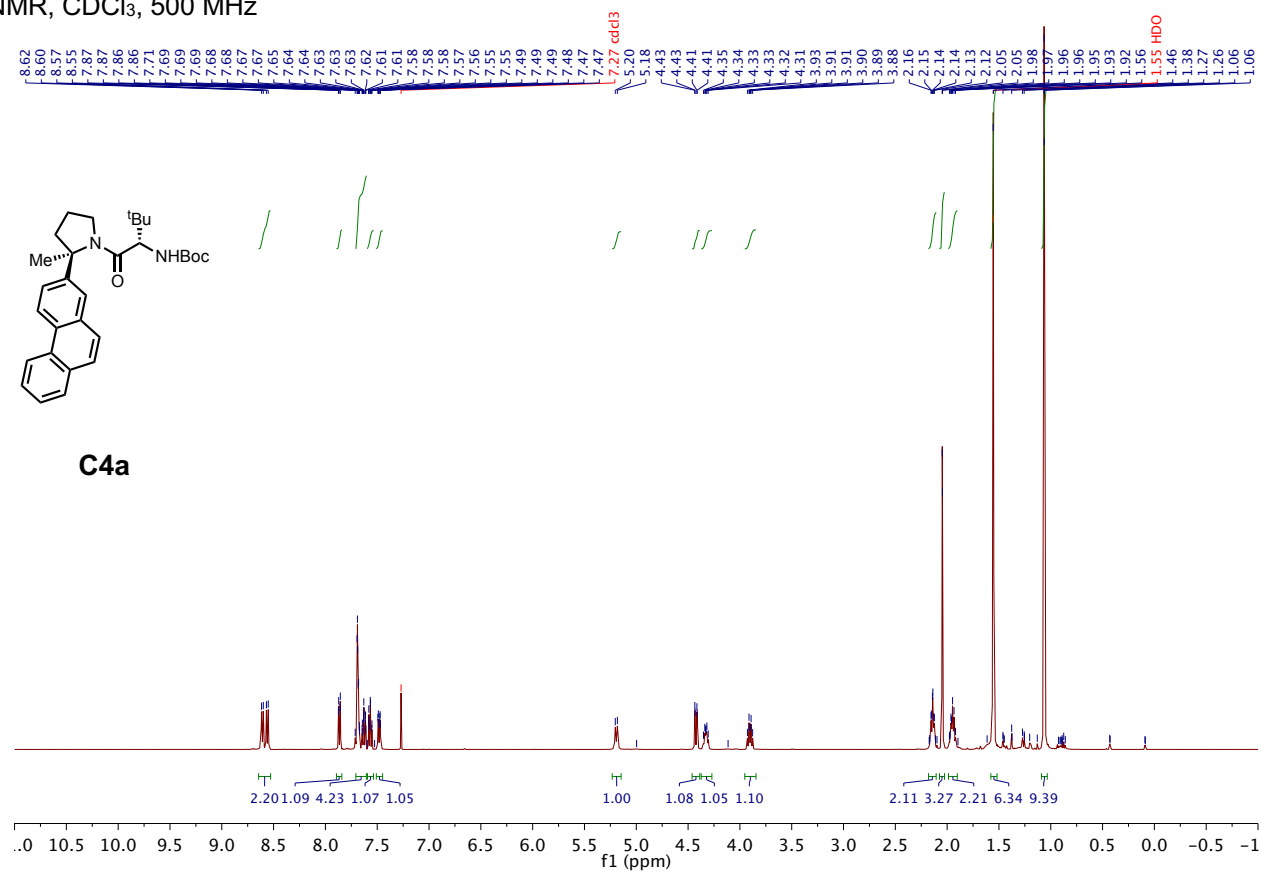

C4a

<sup>13</sup>C NMR, CDCl<sub>3</sub>, 126 MHz

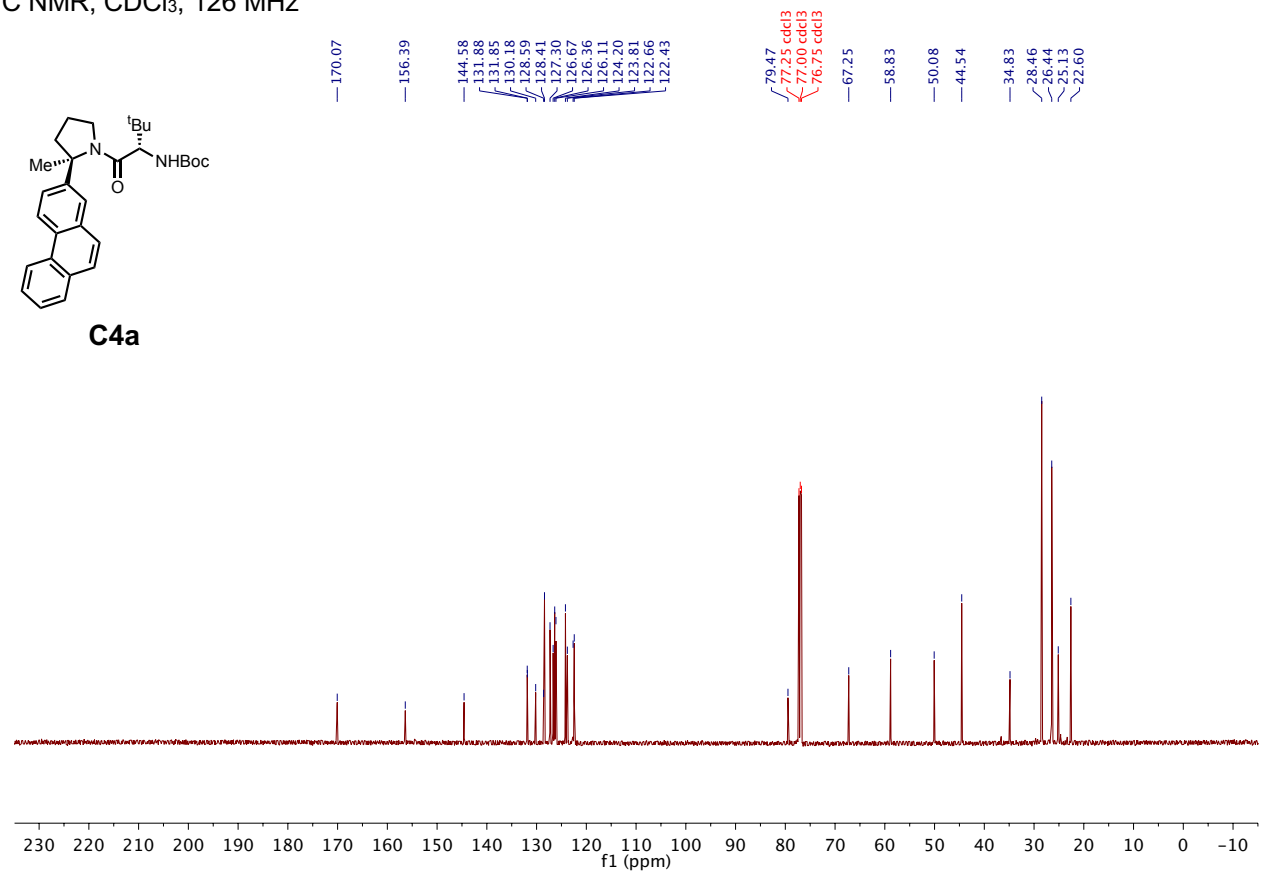

C4a

$^1\text{H}$  NMR,  $\text{CDCl}_3$ , 600 MHz

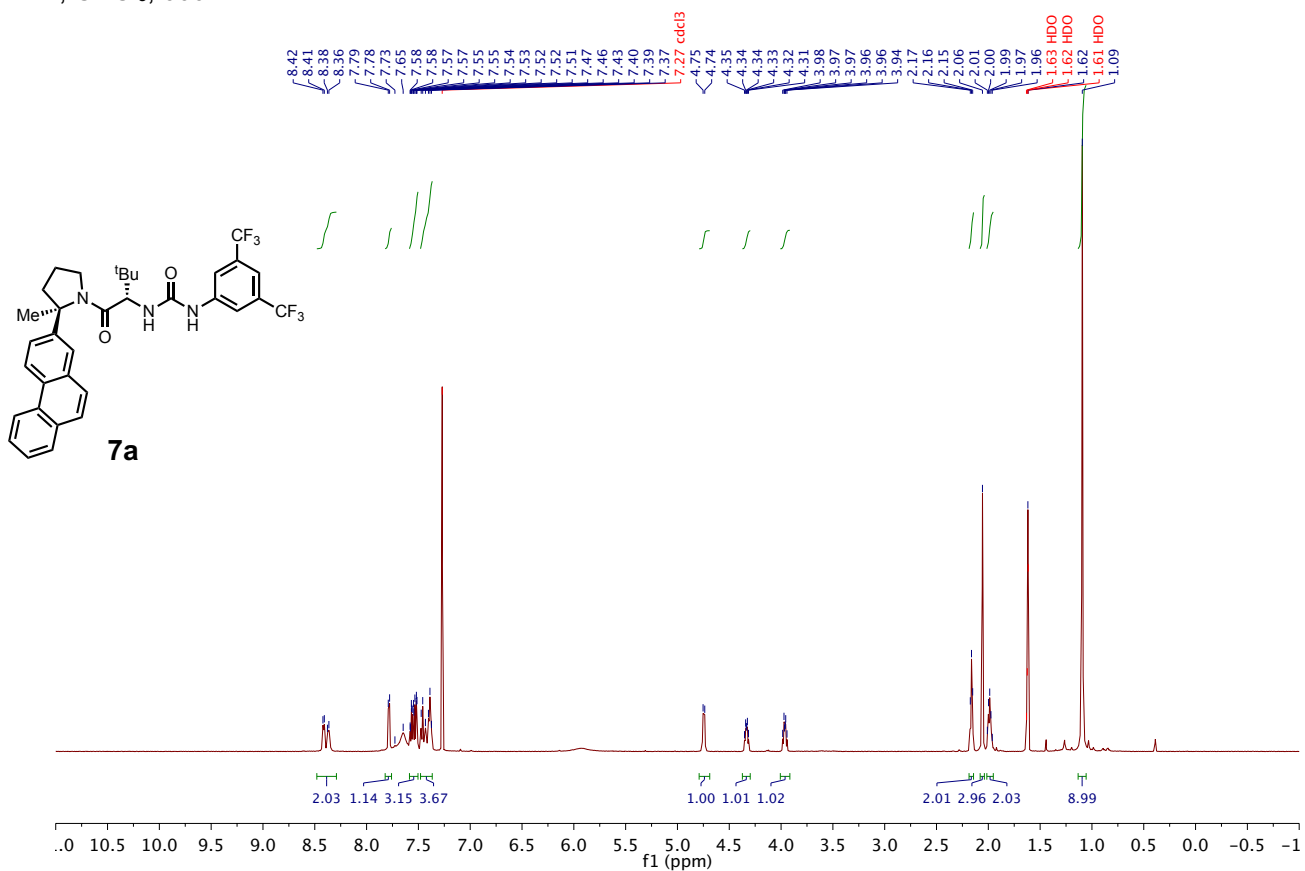

$^{13}\text{C}$  NMR,  $\text{CDCl}_3$ , 126 MHz

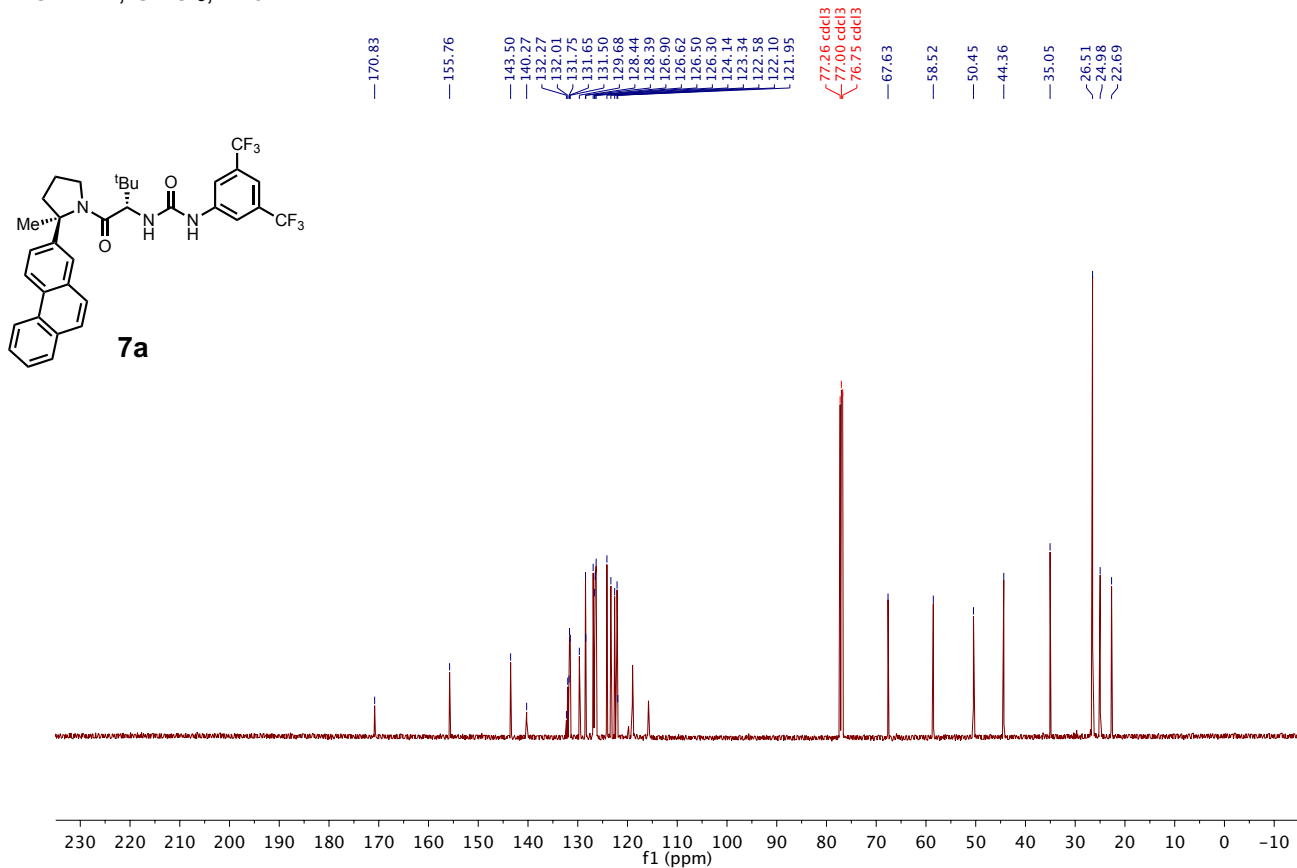

$^{19}\text{F}$  NMR,  $\text{CDCl}_3$ , 471 MHz

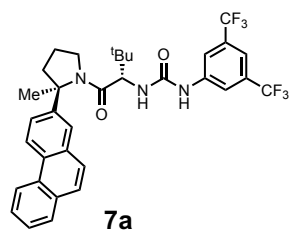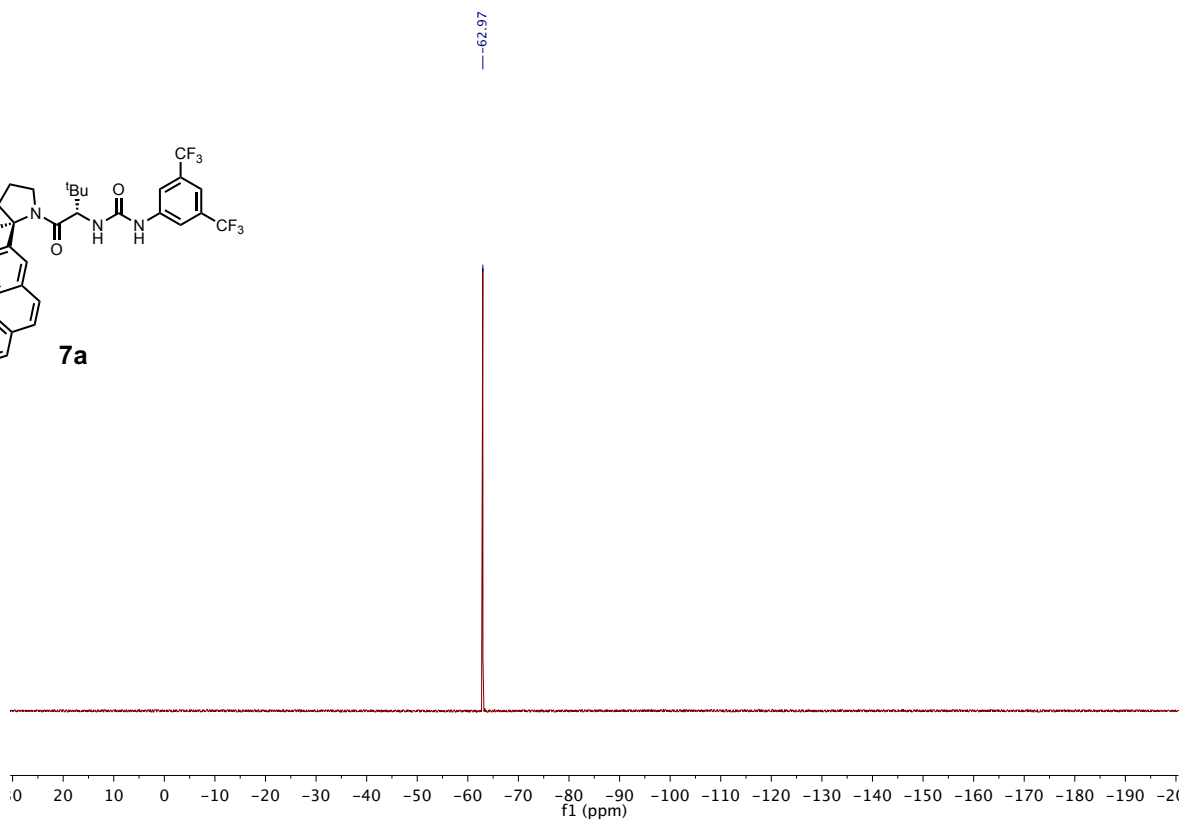

<sup>1</sup>H NMR, CDCl<sub>3</sub>, 500 MHz

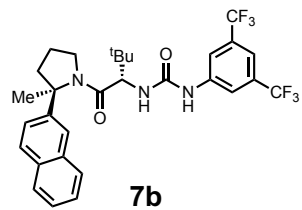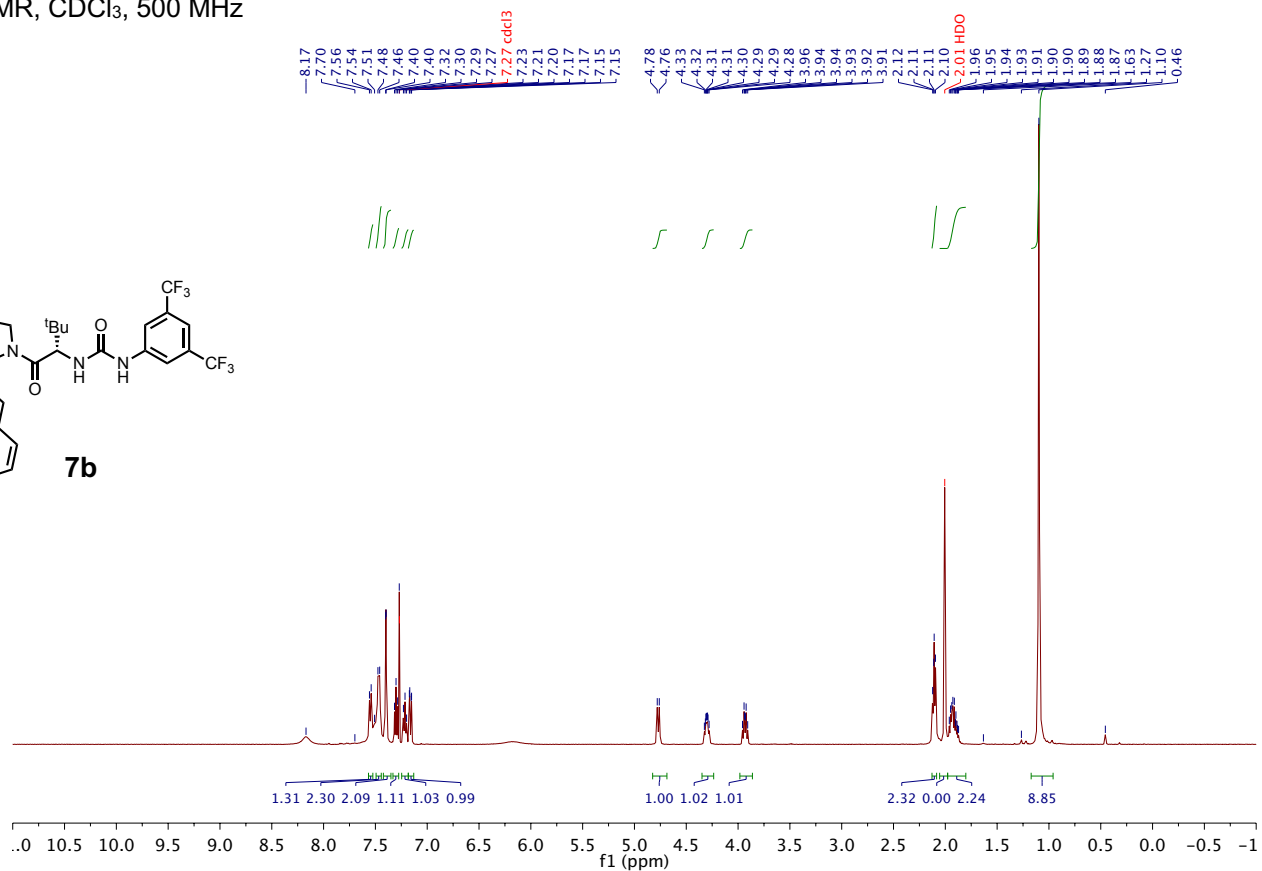

<sup>13</sup>C NMR, CDCl<sub>3</sub>, 126 MHz

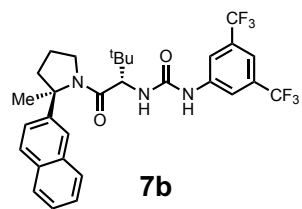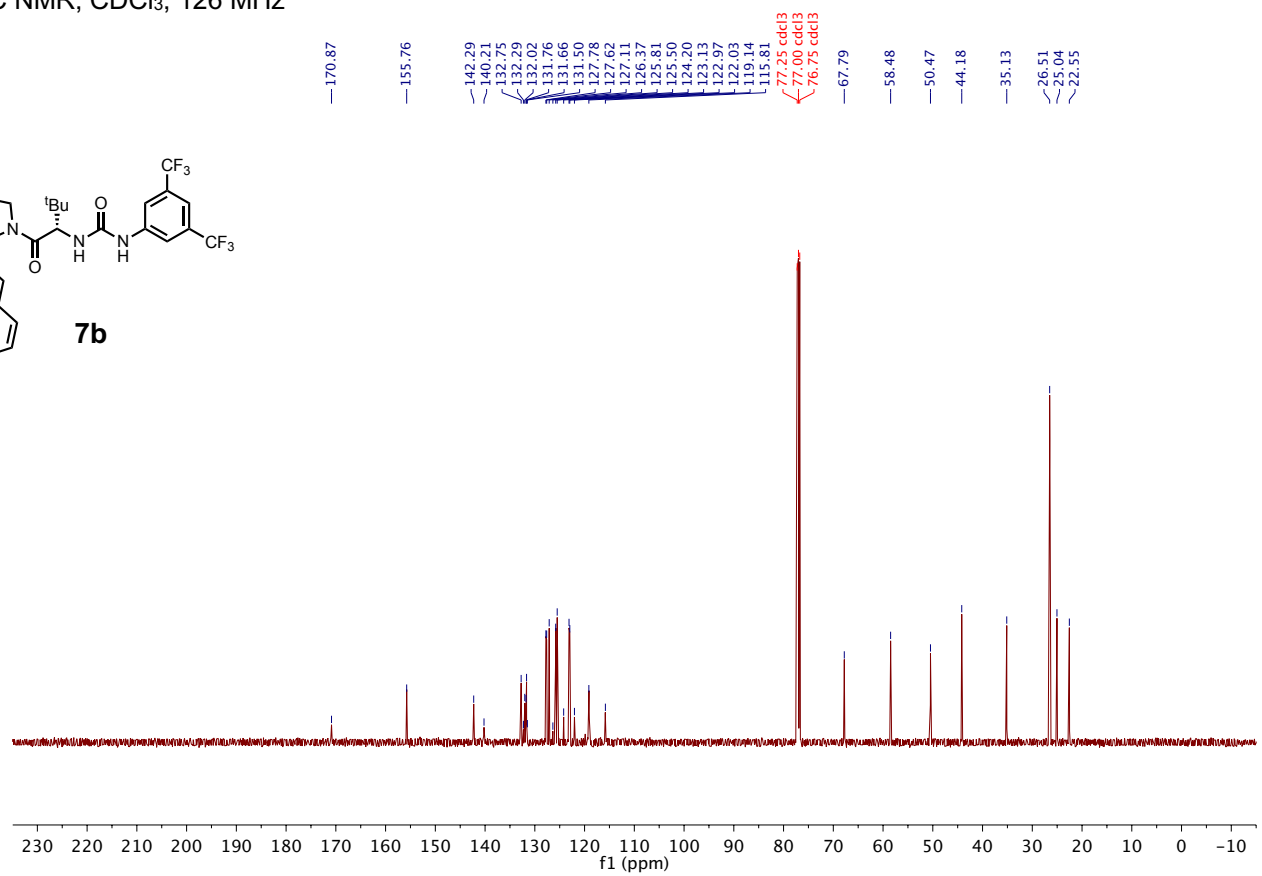

$^{19}\text{F}$  NMR,  $\text{CDCl}_3$ , 471 MHz

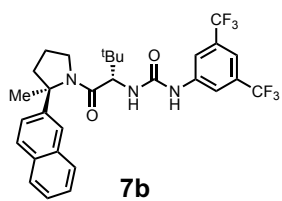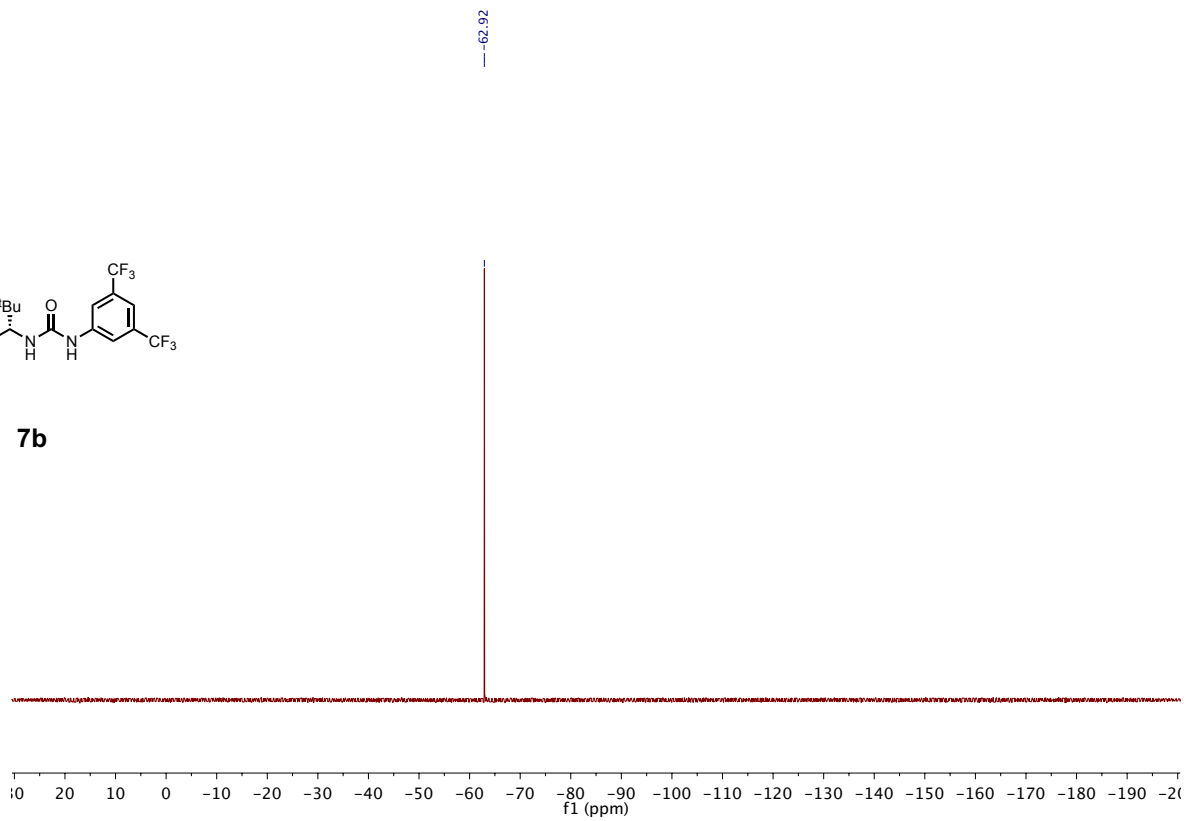

<sup>1</sup>H NMR, CDCl<sub>3</sub>, 500 MHz

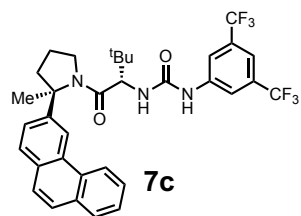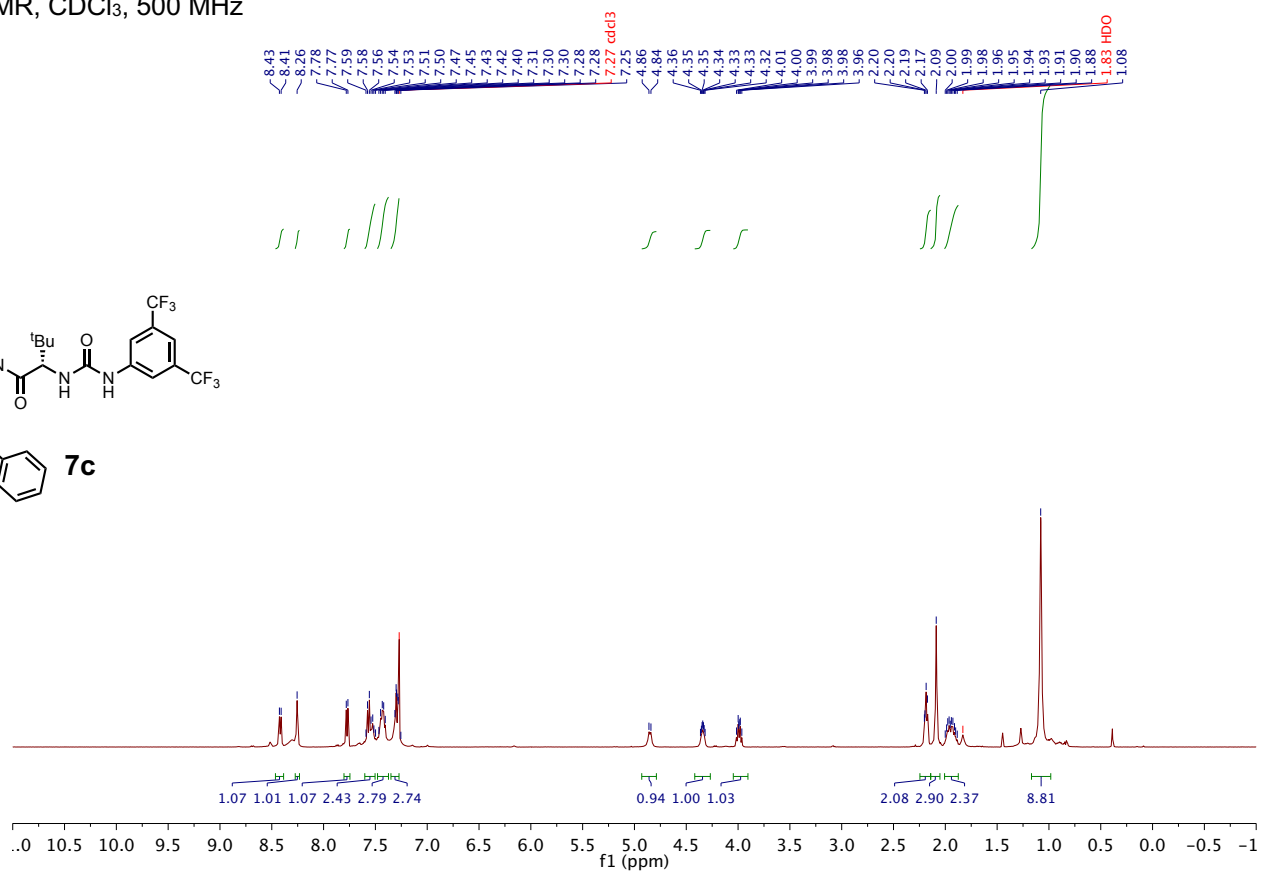

<sup>13</sup>C NMR, CDCl<sub>3</sub>, 126 MHz

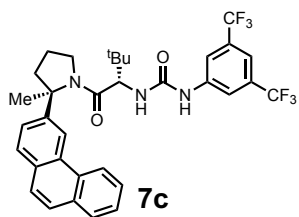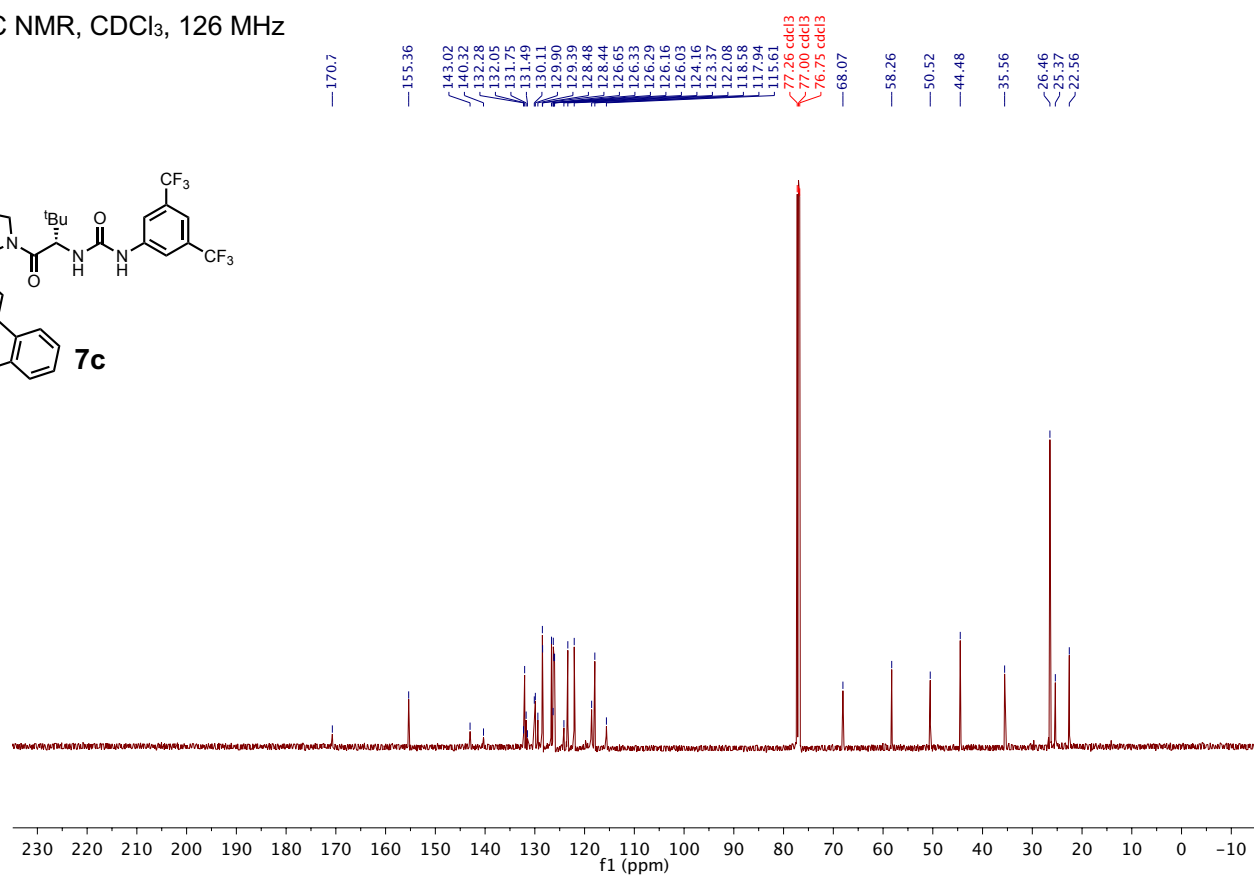

$^{19}\text{F}$  NMR,  $\text{CDCl}_3$ , 471 MHz

-62.92

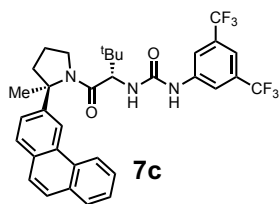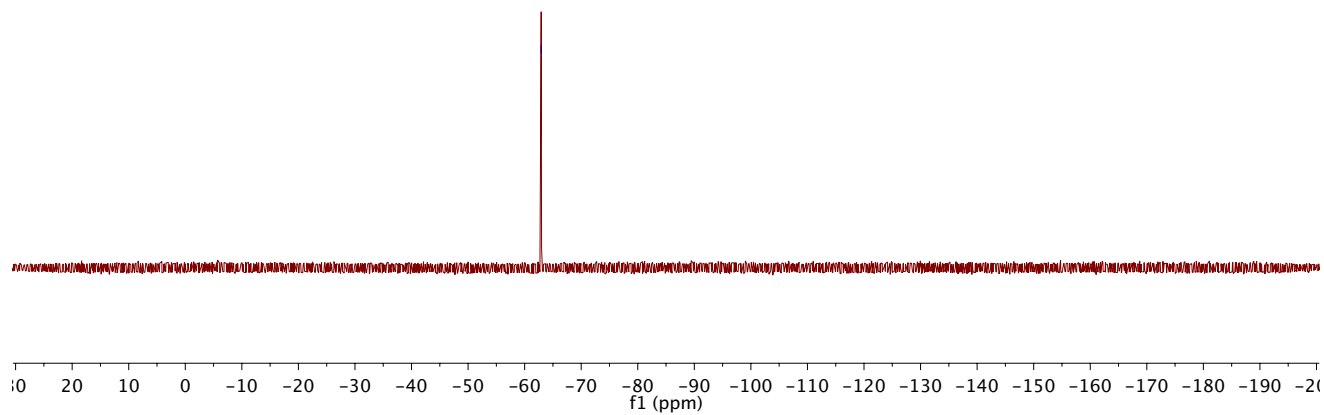

<sup>1</sup>H NMR, CDCl<sub>3</sub>, 500 MHz

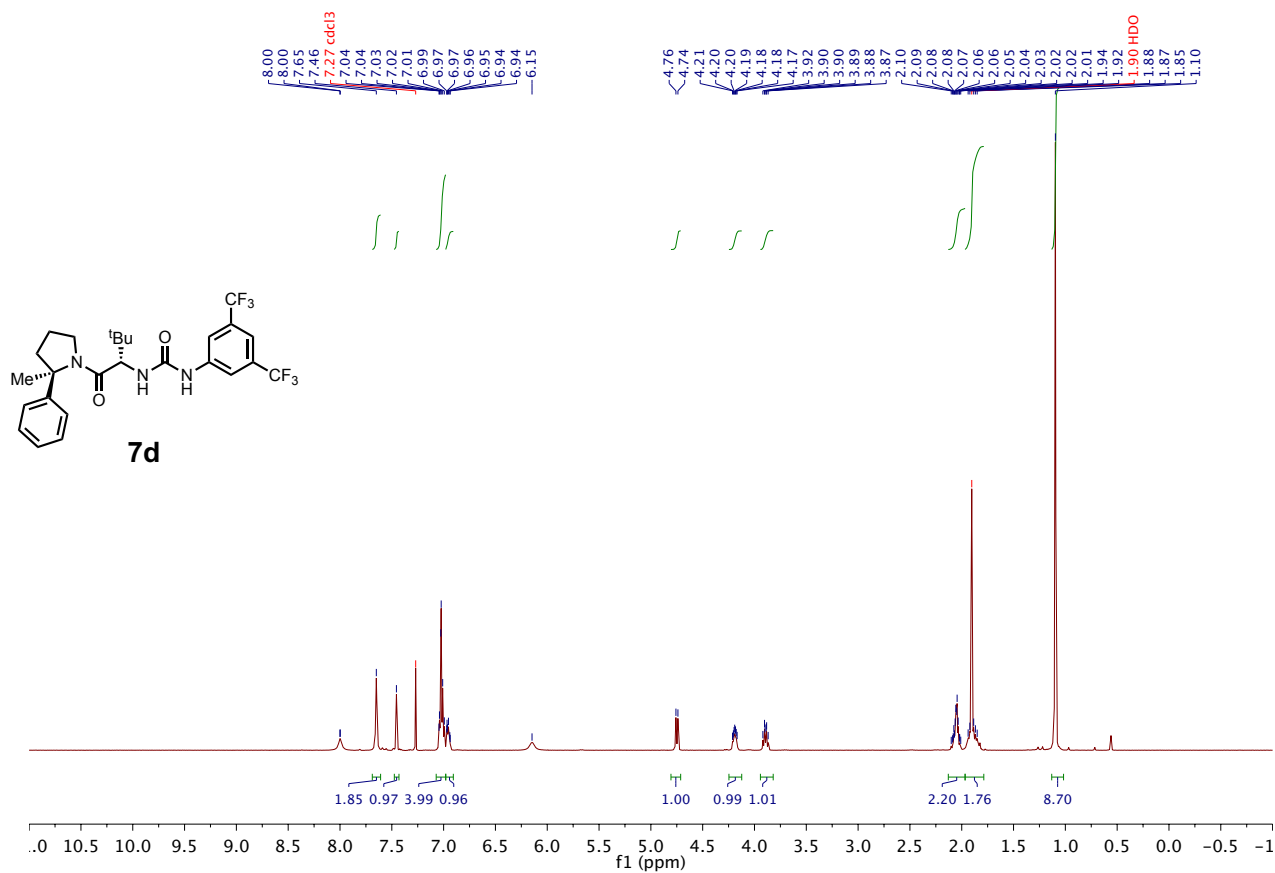

<sup>13</sup>C NMR, CDCl<sub>3</sub>, 126 MHz

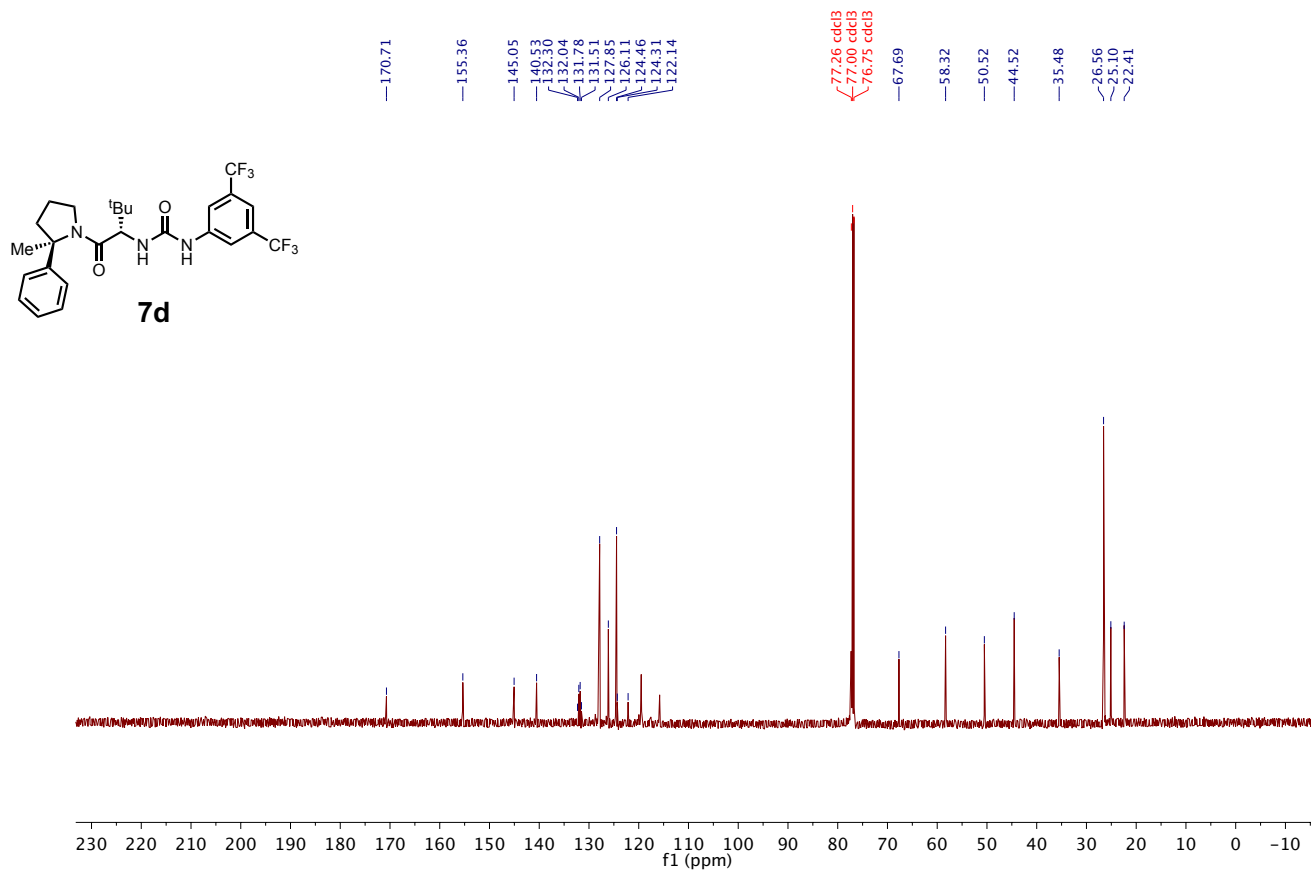



$^{19}\text{F}$  NMR,  $\text{CDCl}_3$ , 471 MHz

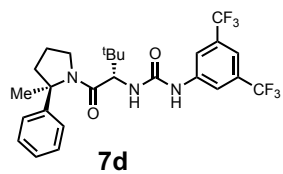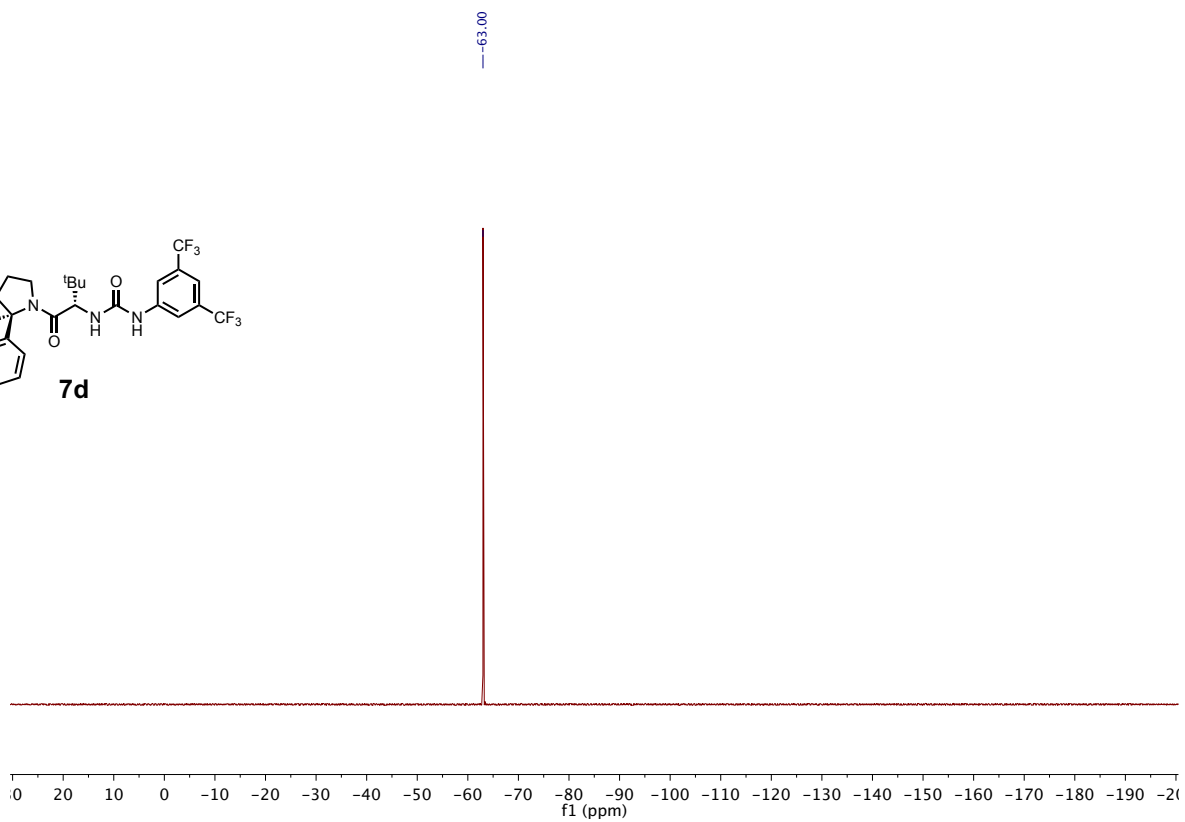

$^1\text{H}$  NMR,  $\text{CDCl}_3$ , 500 MHz

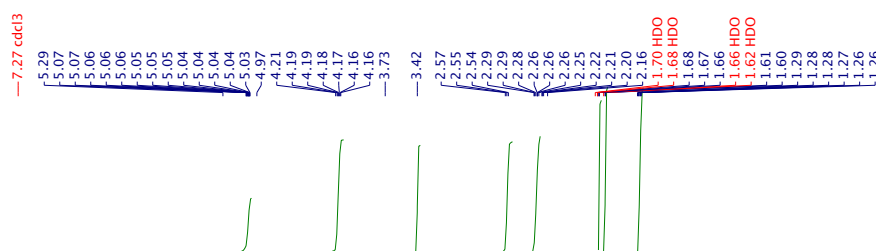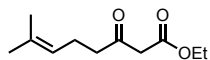

S1

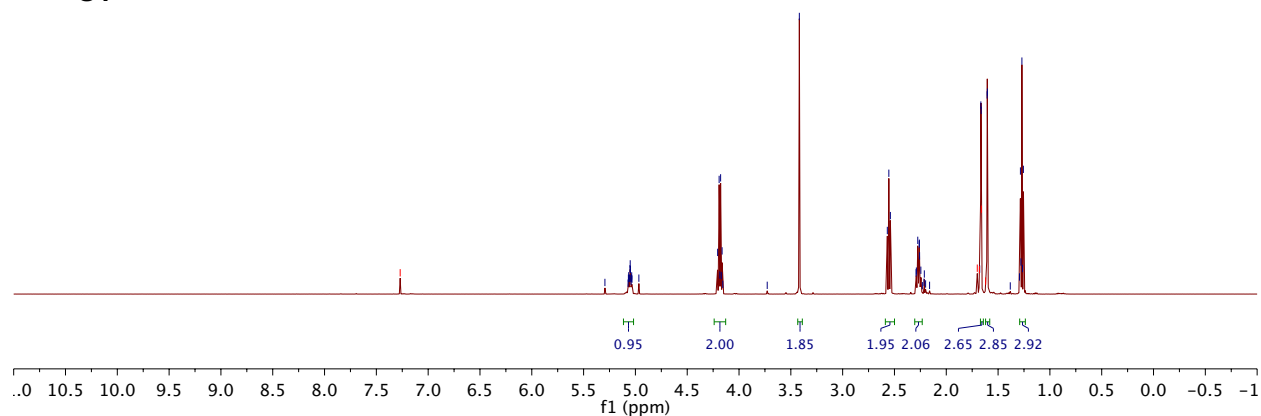

$^{13}\text{C}$  NMR,  $\text{CDCl}_3$ , 126 MHz

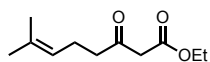

S1

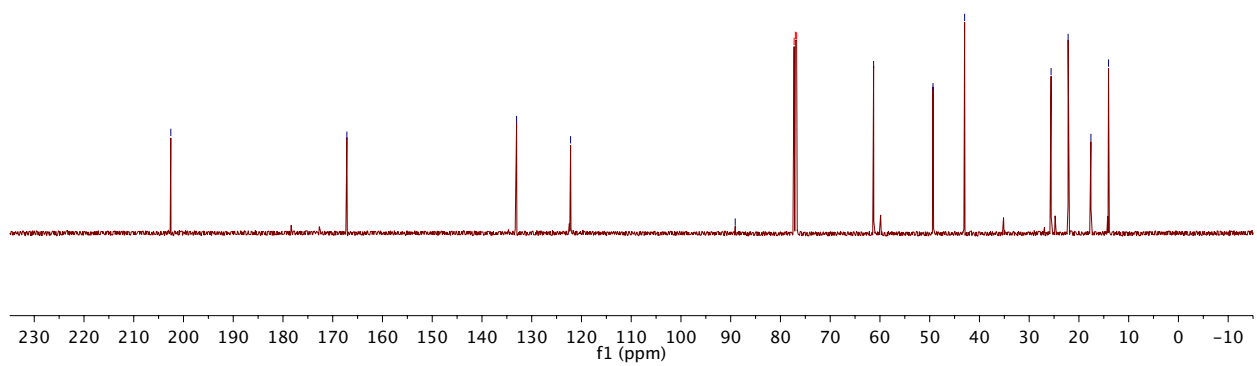

<sup>1</sup>H NMR, CDCl<sub>3</sub>, 500 MHz

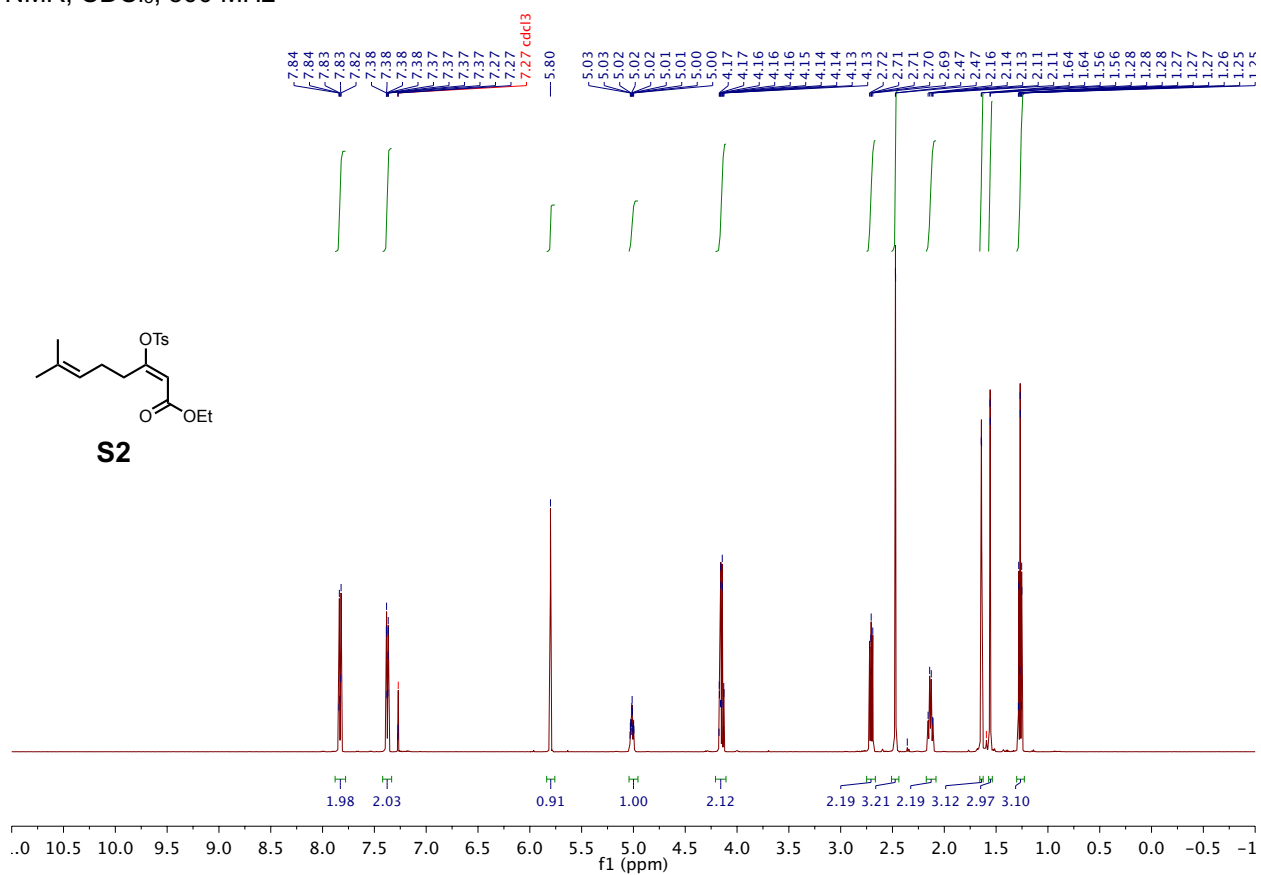

<sup>13</sup>C NMR, CDCl<sub>3</sub>, 126 MHz

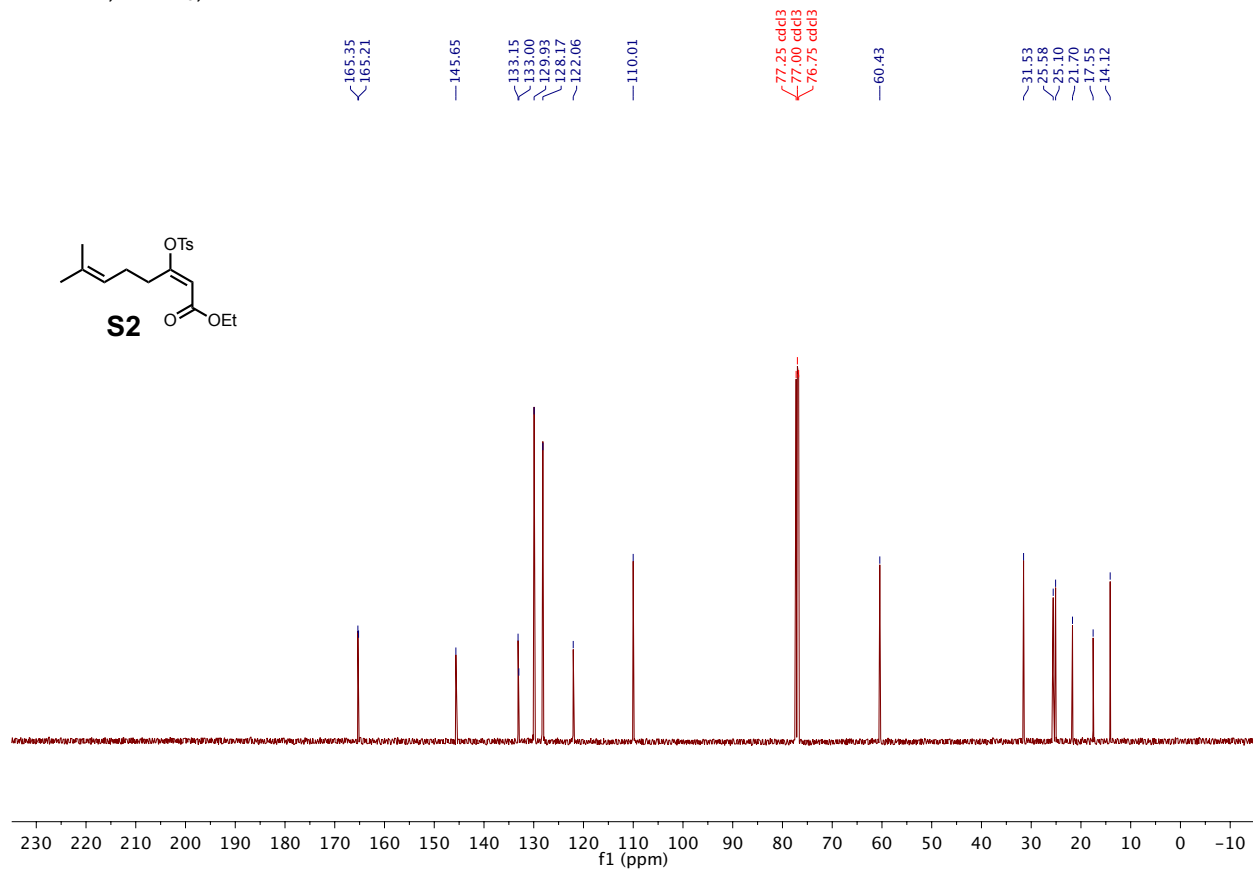

<sup>1</sup>H NMR, CDCl<sub>3</sub>, 500 MHz

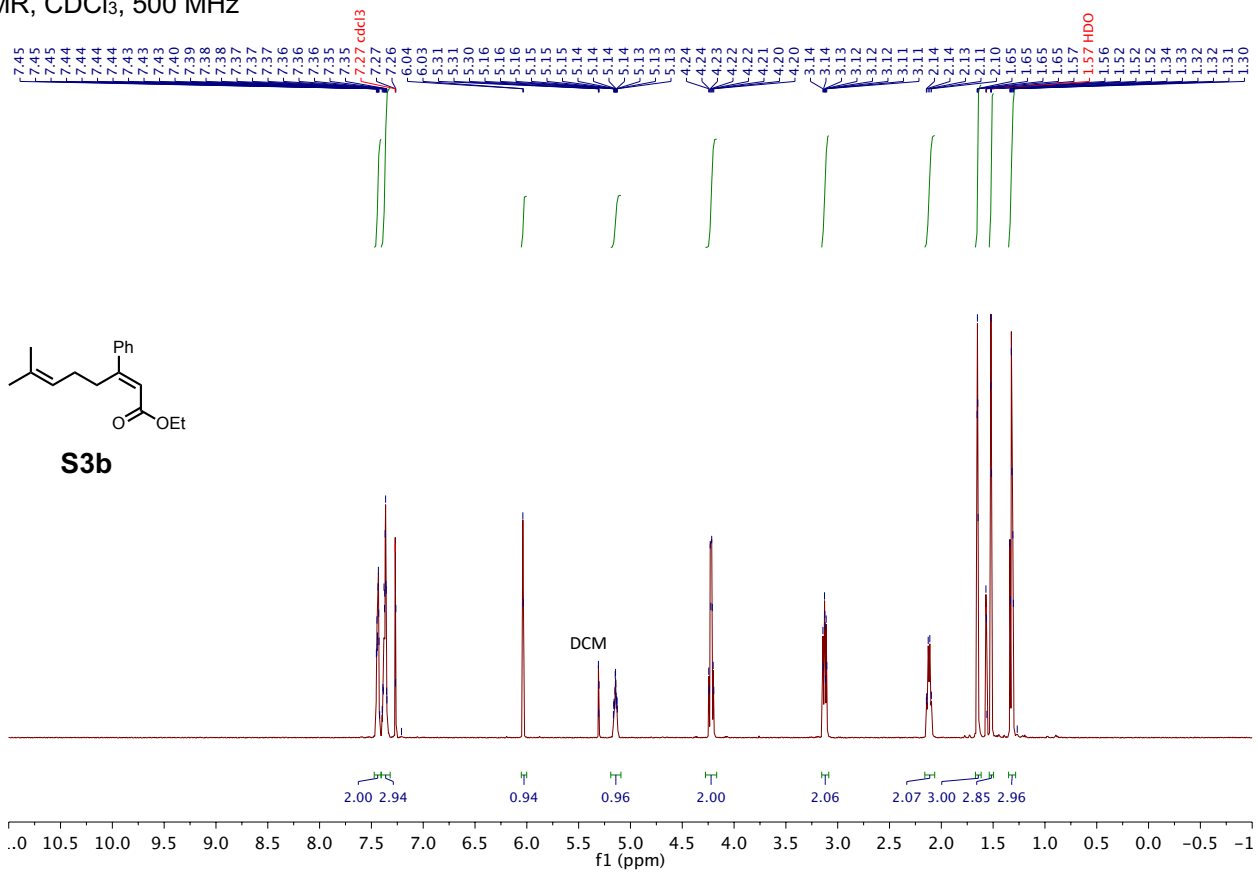

<sup>13</sup>C NMR, CDCl<sub>3</sub>, 126 MHz

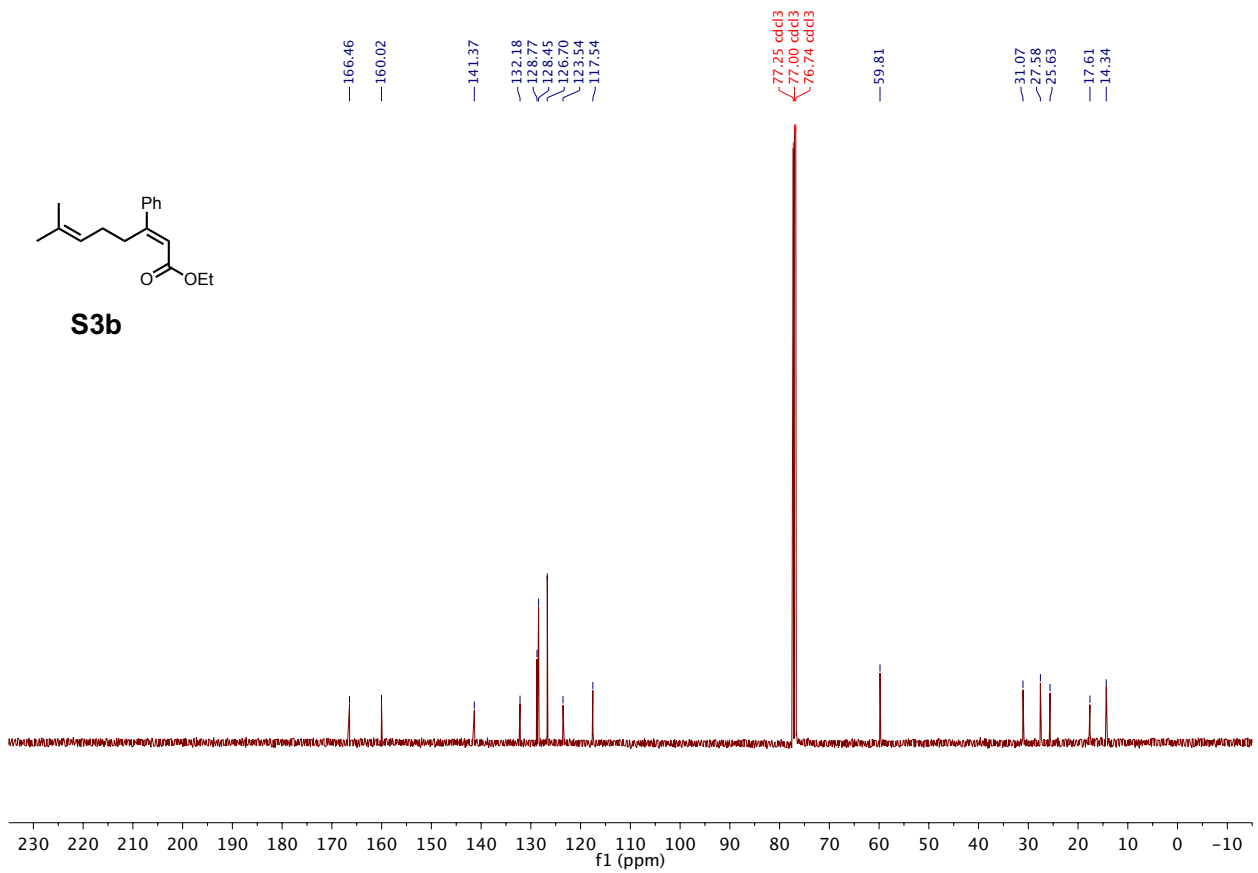

<sup>1</sup>H NMR, CDCl<sub>3</sub>, 500 MHz

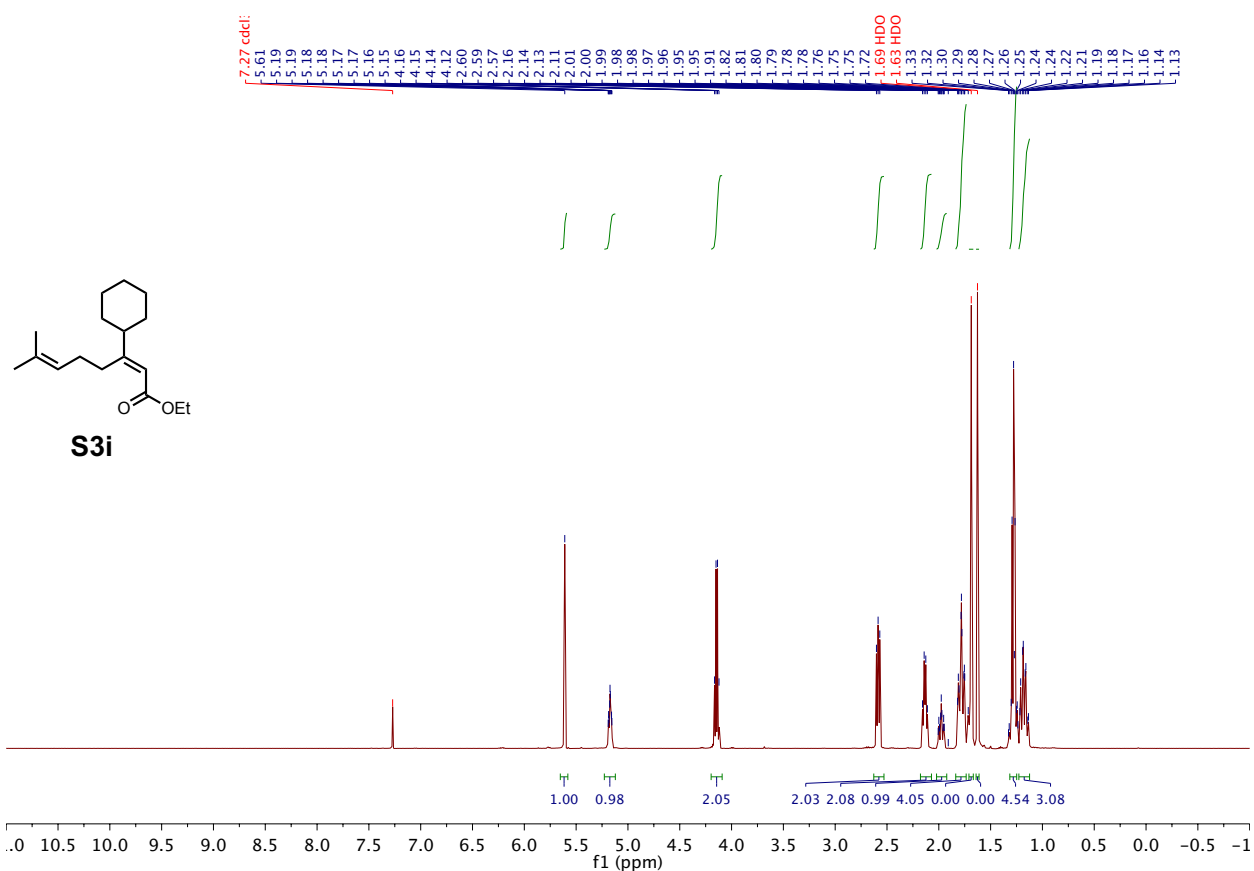

<sup>13</sup>C NMR, CDCl<sub>3</sub>, 126 MHz

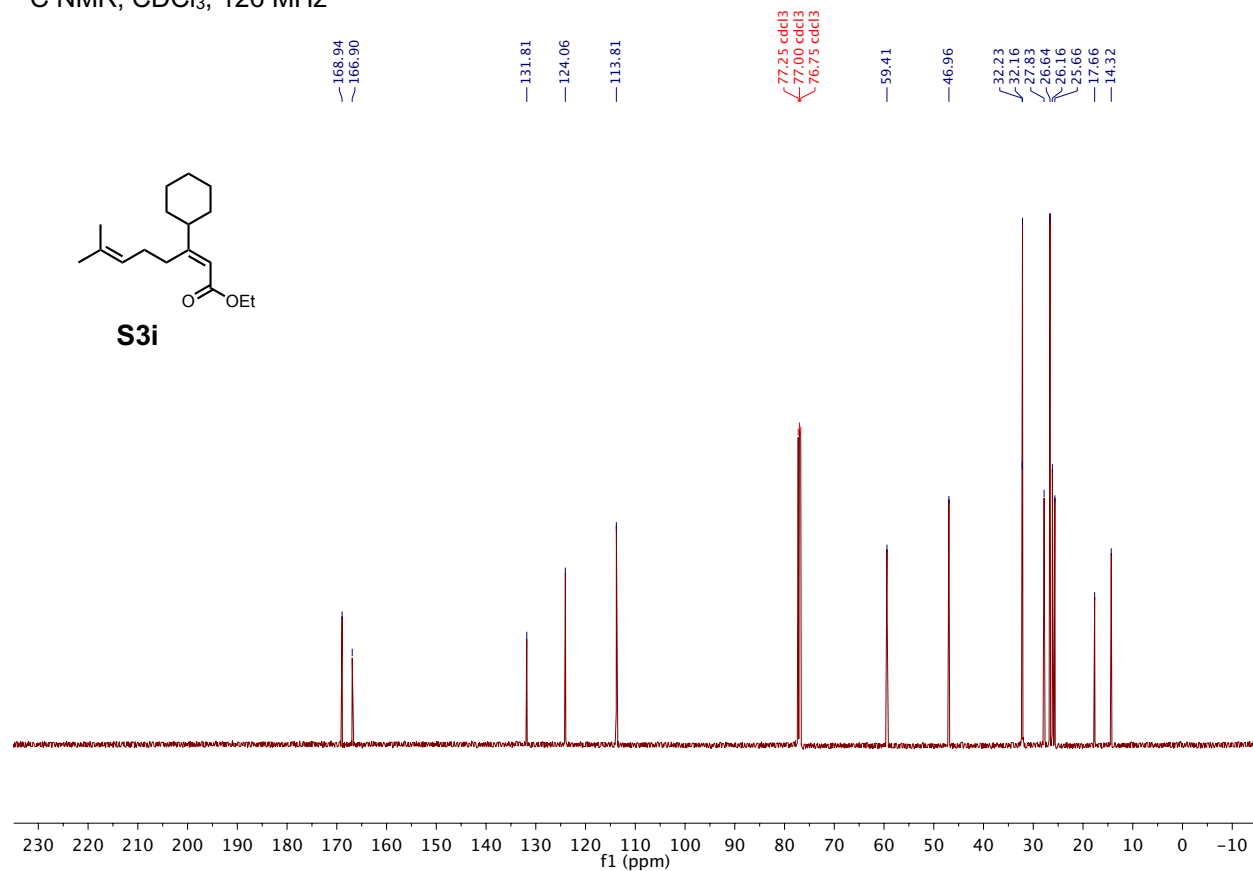

<sup>1</sup>H NMR, CDCl<sub>3</sub>, 600 MHz

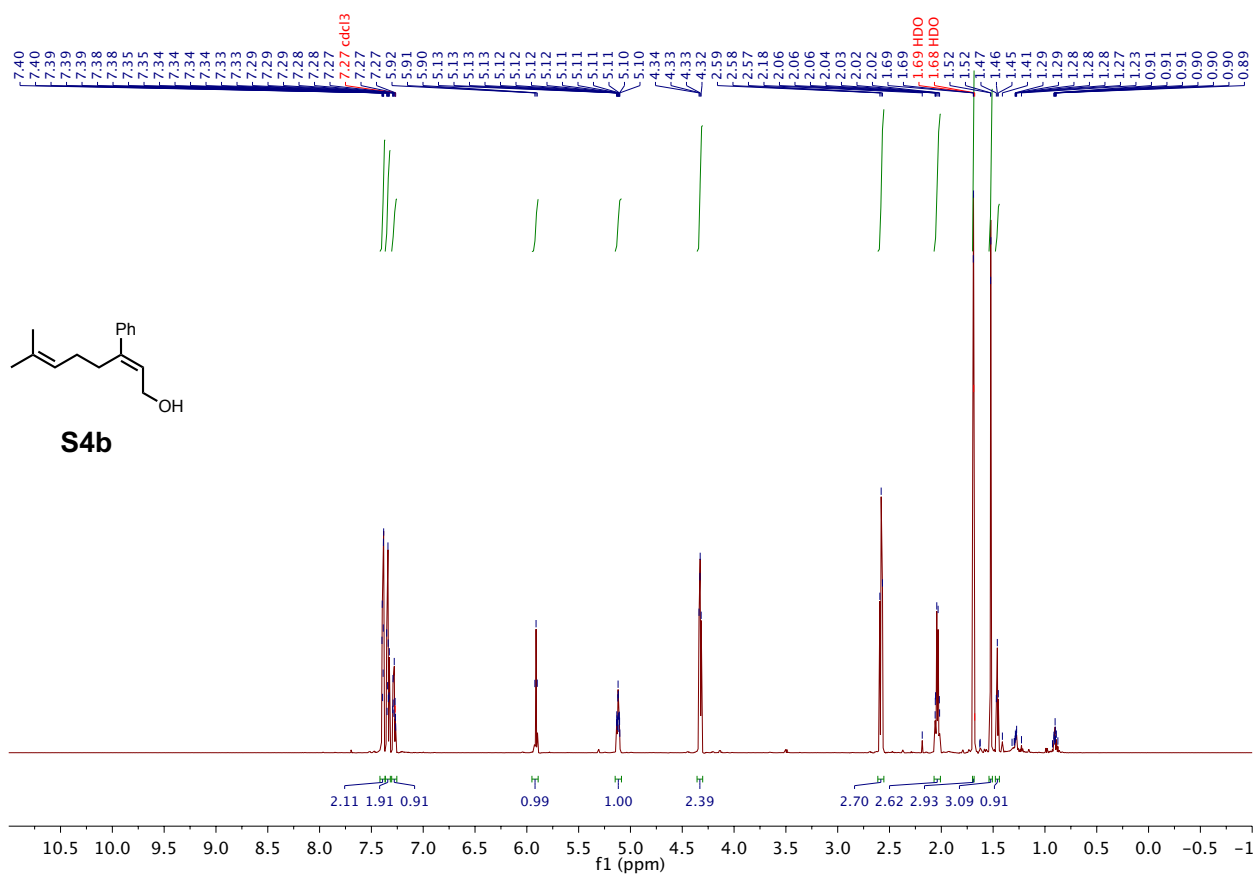

<sup>13</sup>C NMR, CDCl<sub>3</sub>, 126 MHz

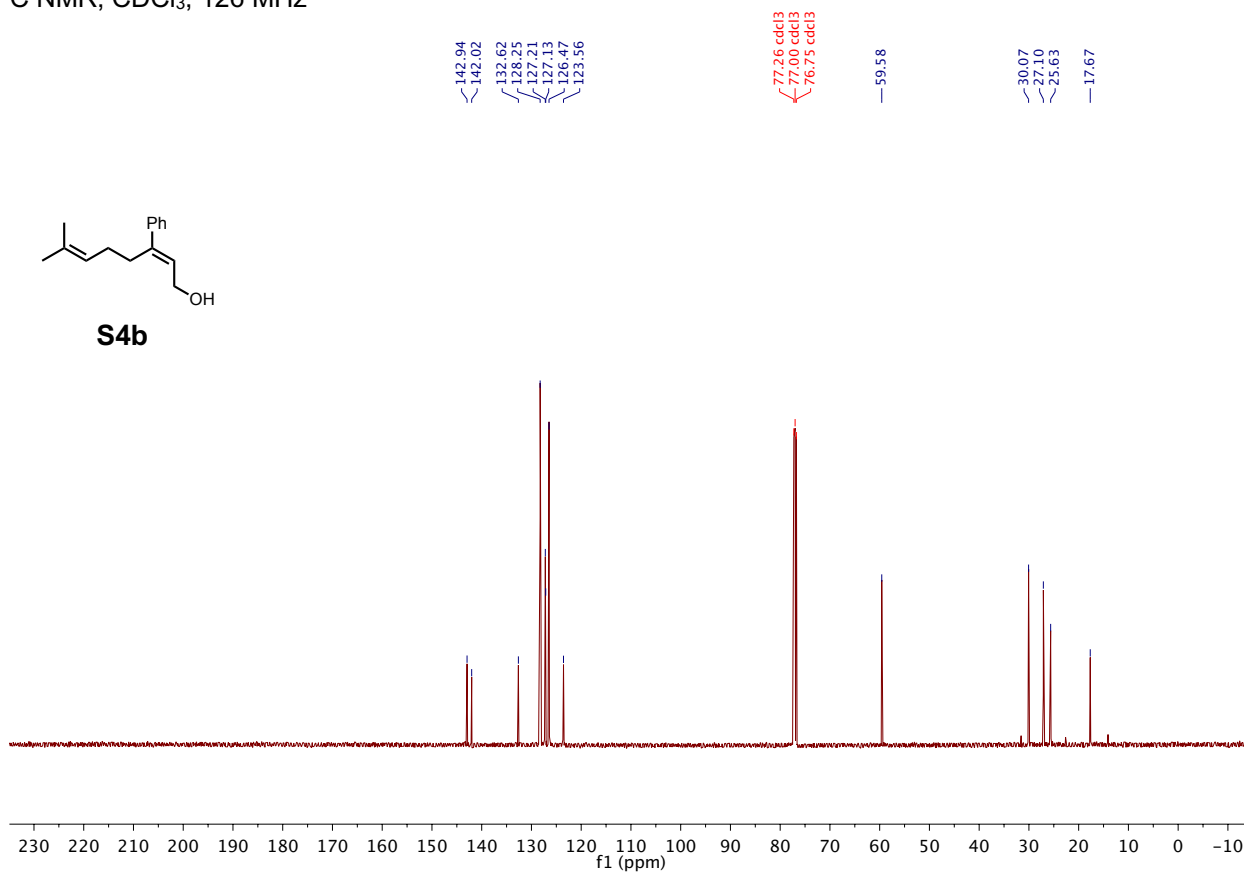

<sup>1</sup>H NMR, CDCl<sub>3</sub>, 500 MHz

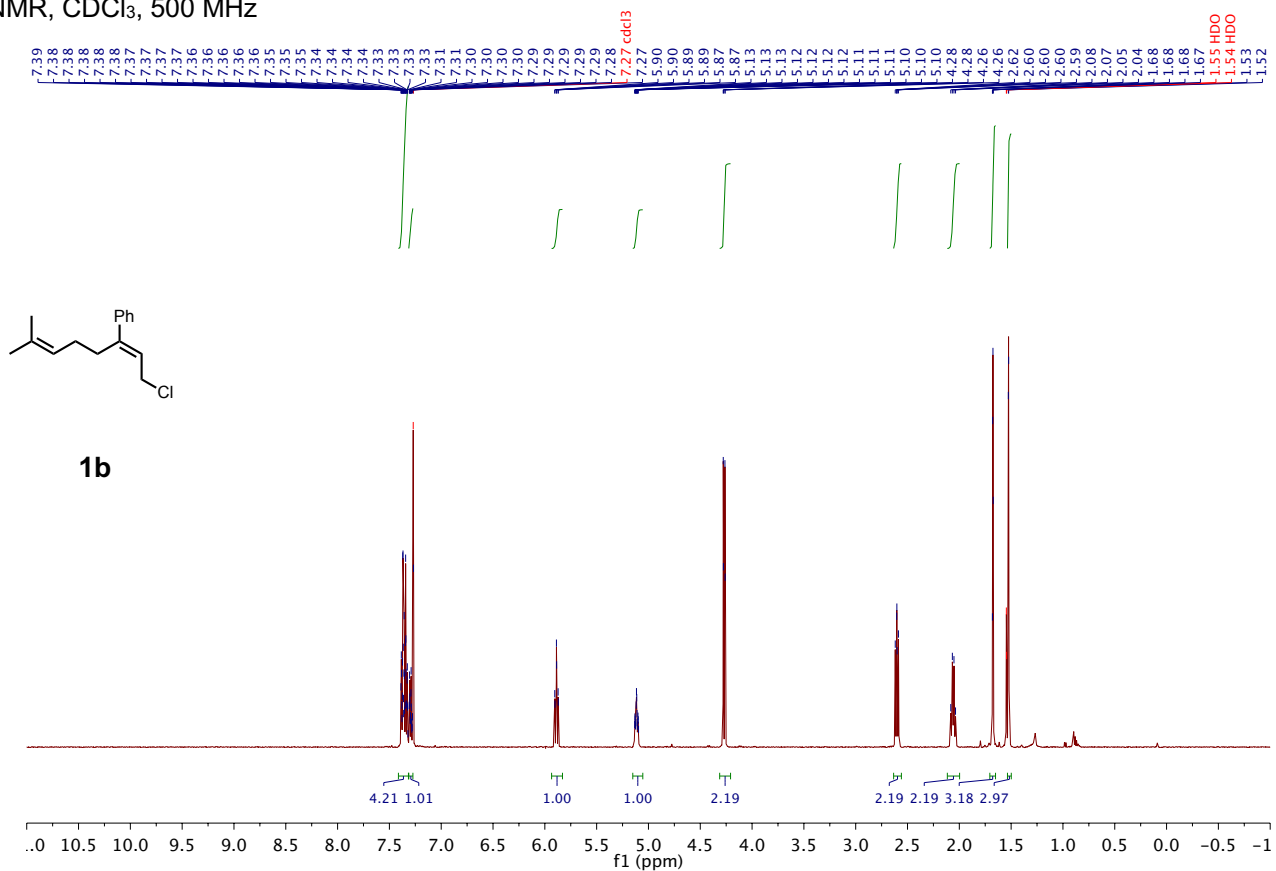

<sup>13</sup>C NMR, CDCl<sub>3</sub>, 126 MHz

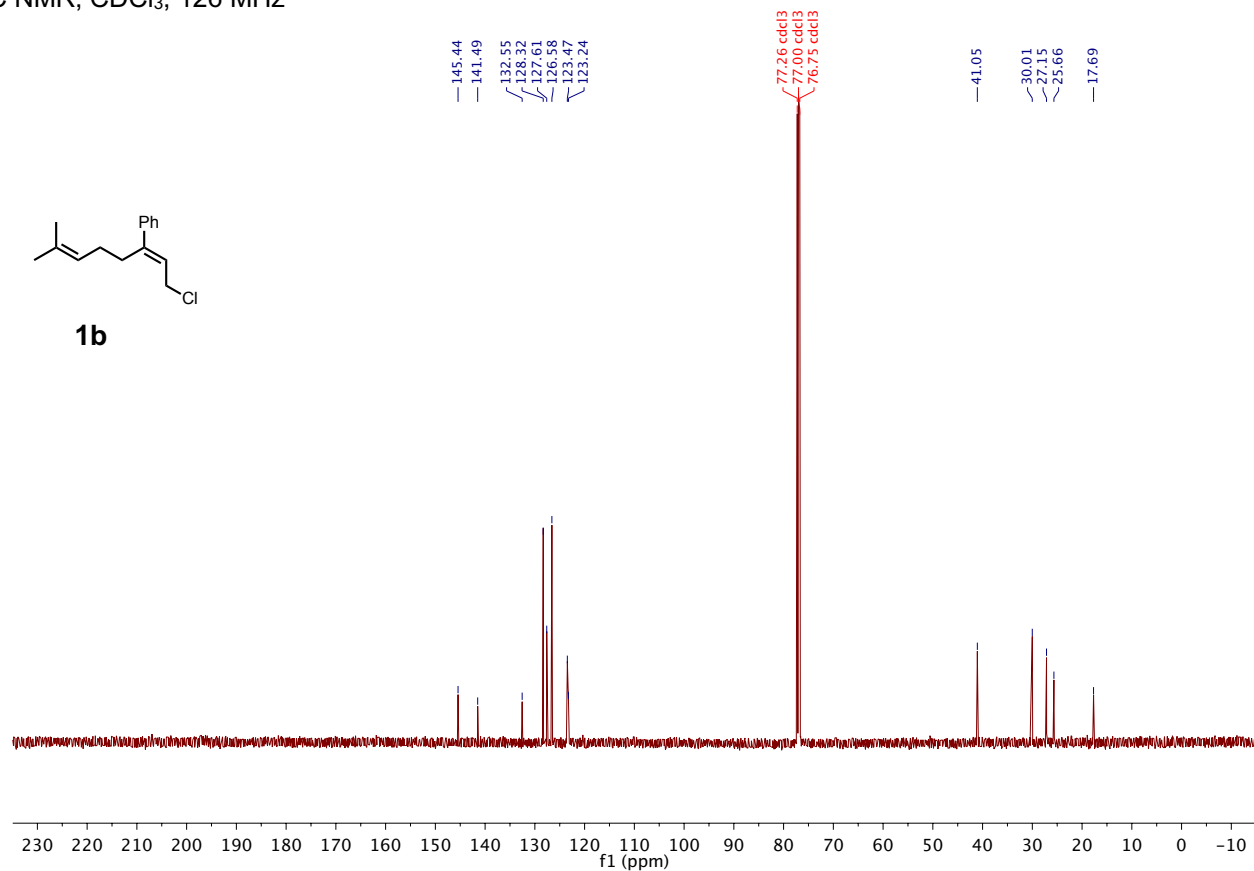

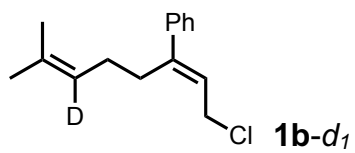

1H, 599.79 MHz, cdcl<sub>3</sub>

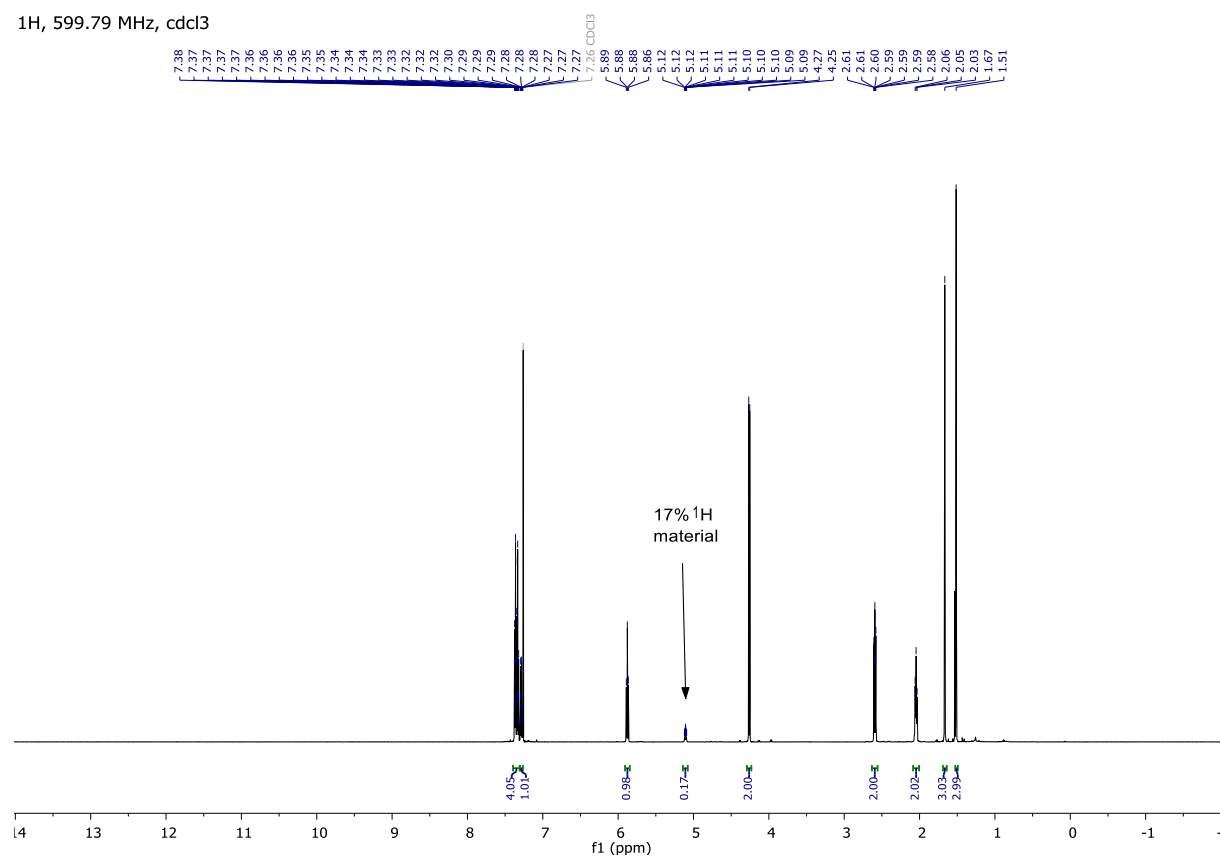



$^1\text{H}$  NMR,  $\text{CDCl}_3$ , 600 MHz

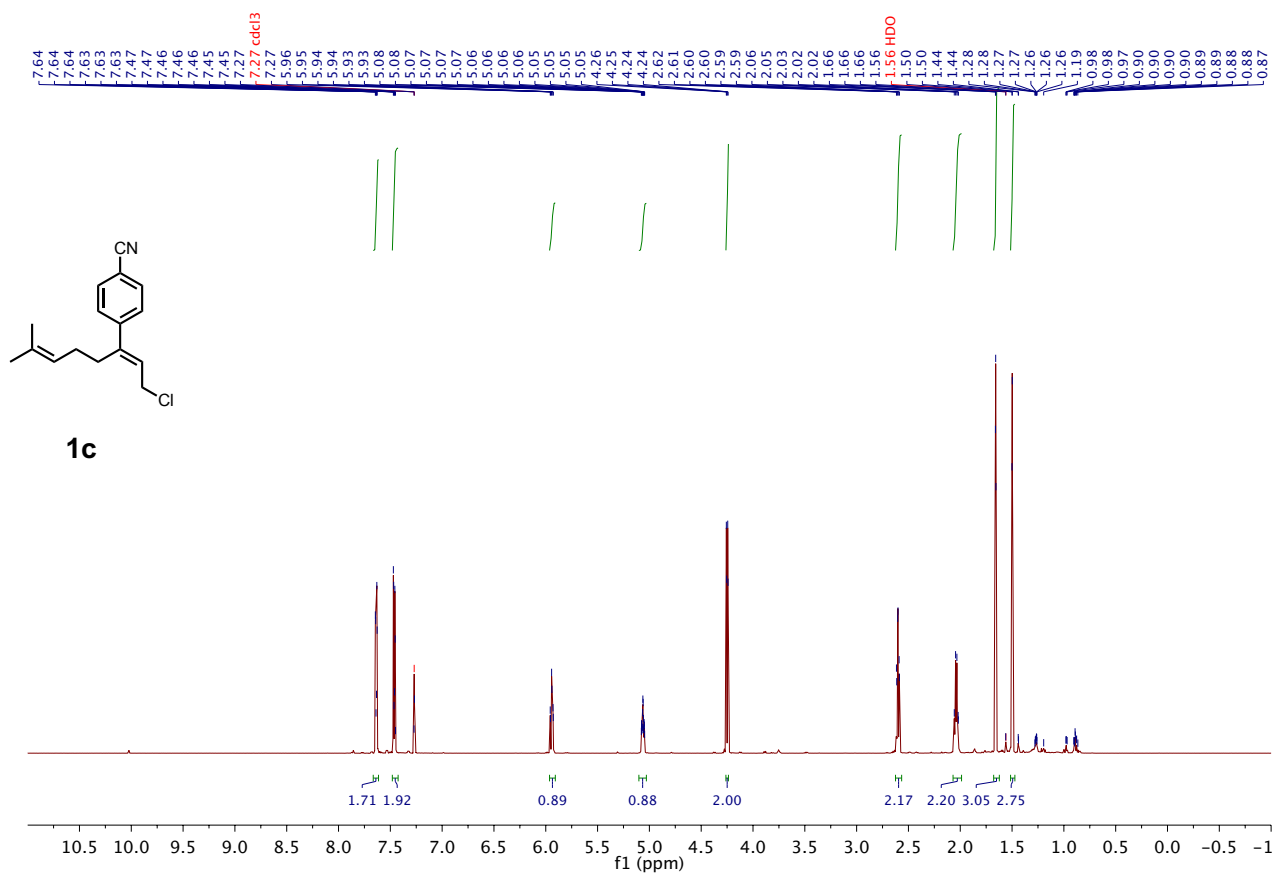

$^{13}\text{C}$  NMR,  $\text{CDCl}_3$ , 126 MHz

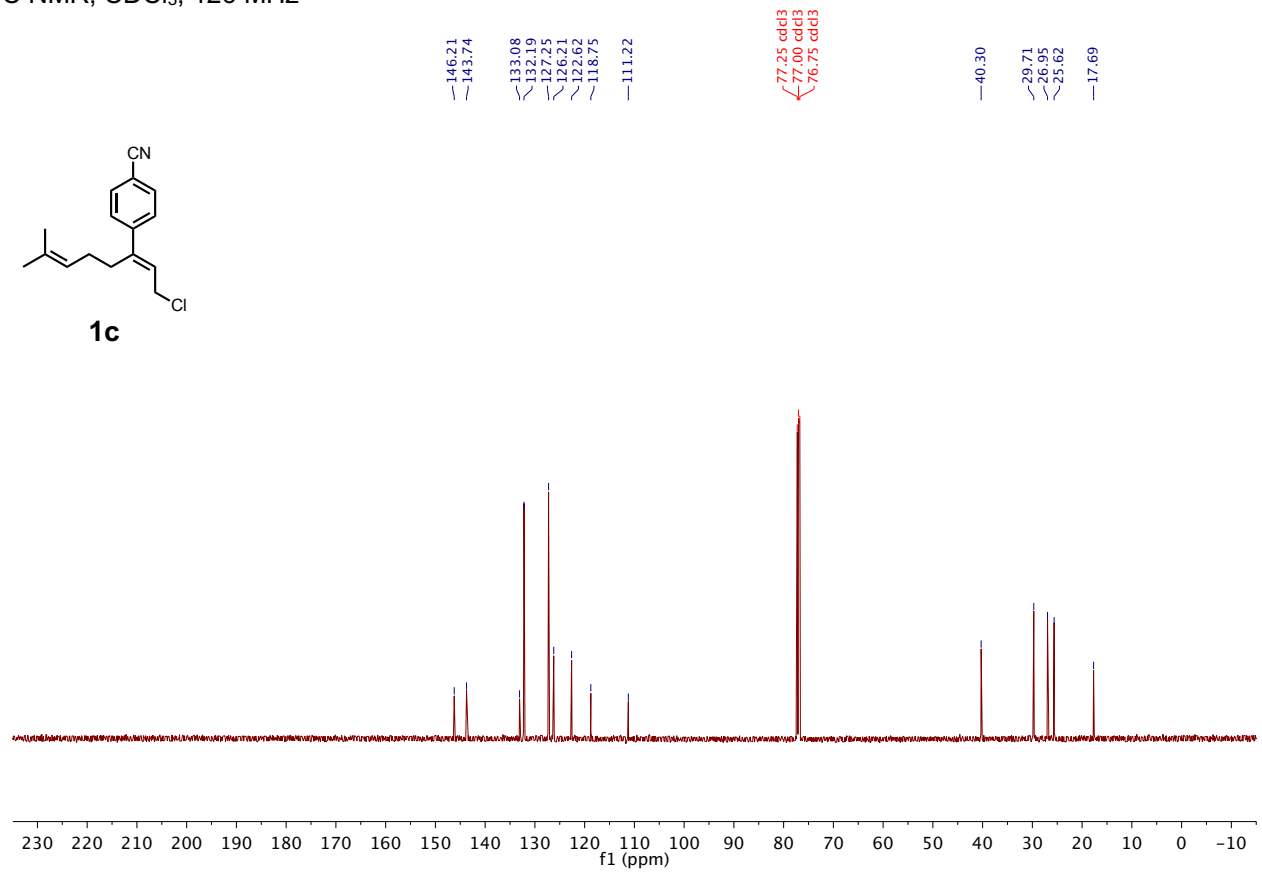

$^1\text{H}$  NMR,  $\text{CDCl}_3$ , 500 MHz

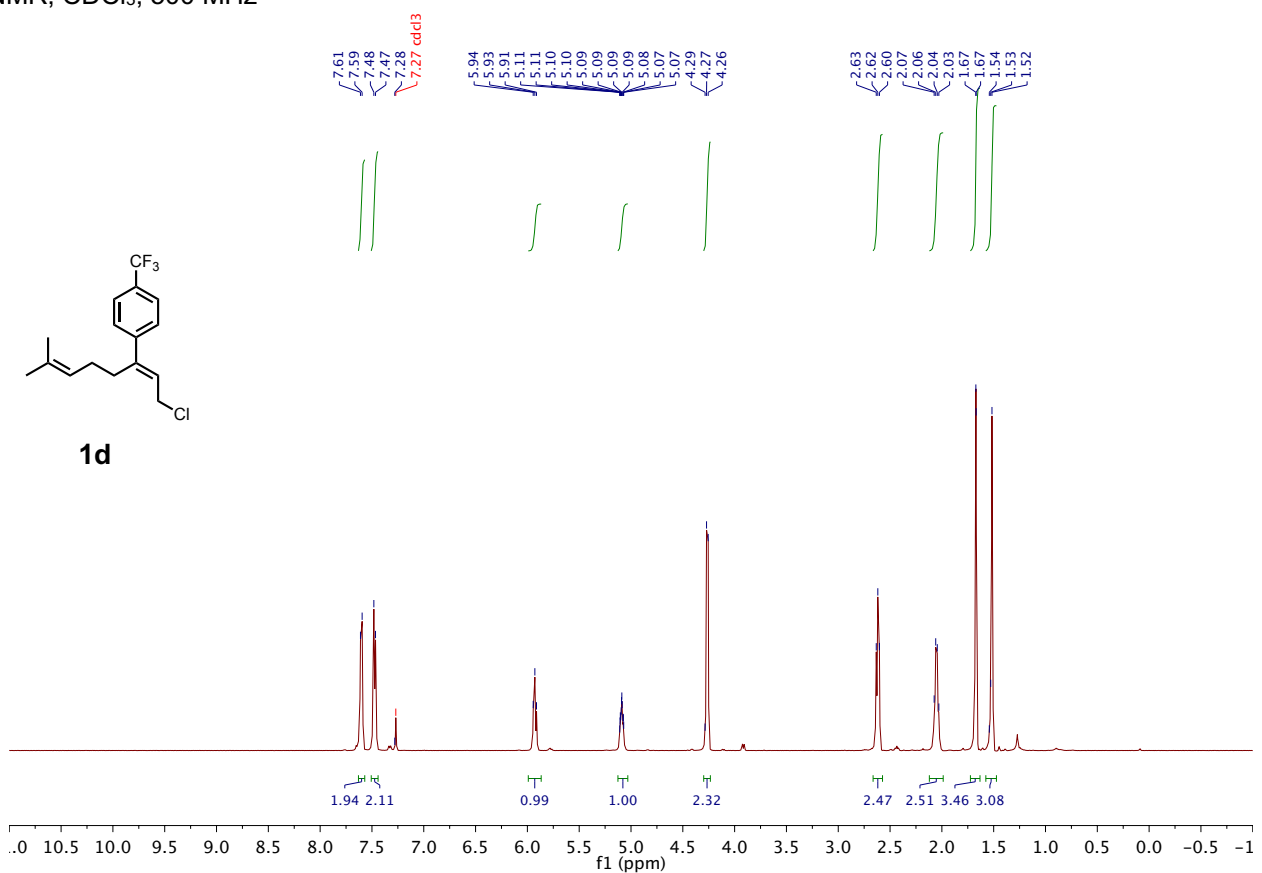

$^{13}\text{C}$  NMR,  $\text{CDCl}_3$ , 126 MHz

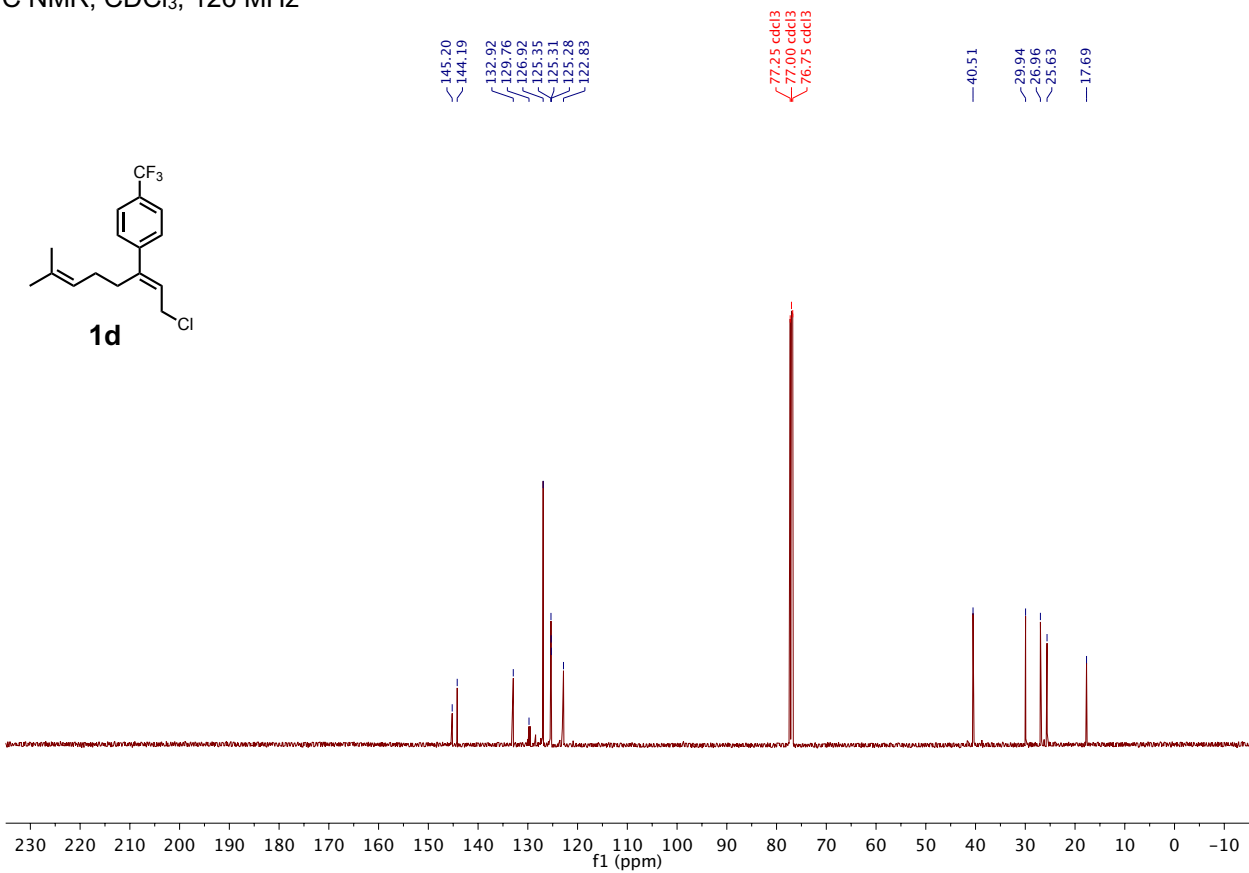

$^{19}\text{F}$  NMR,  $\text{CDCl}_3$ , 471 MHz

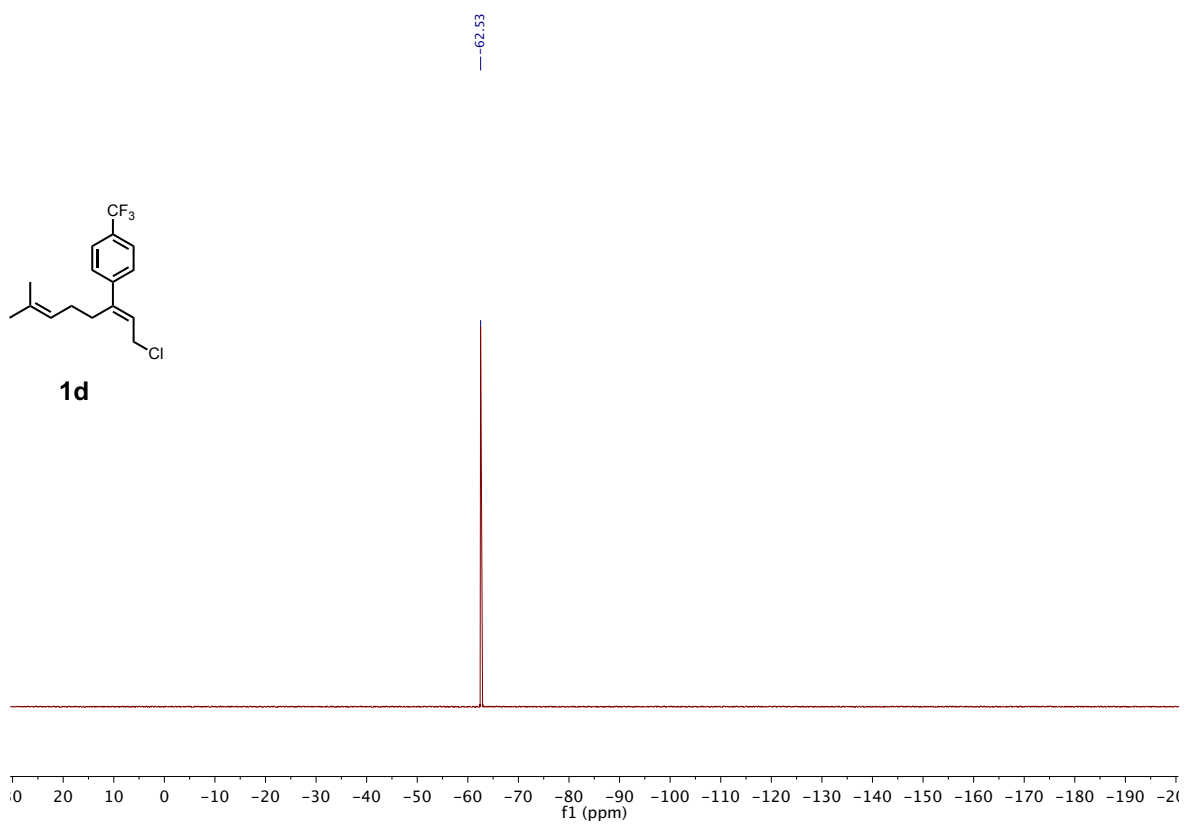

$^1\text{H}$  NMR,  $\text{CDCl}_3$ , 600 MHz

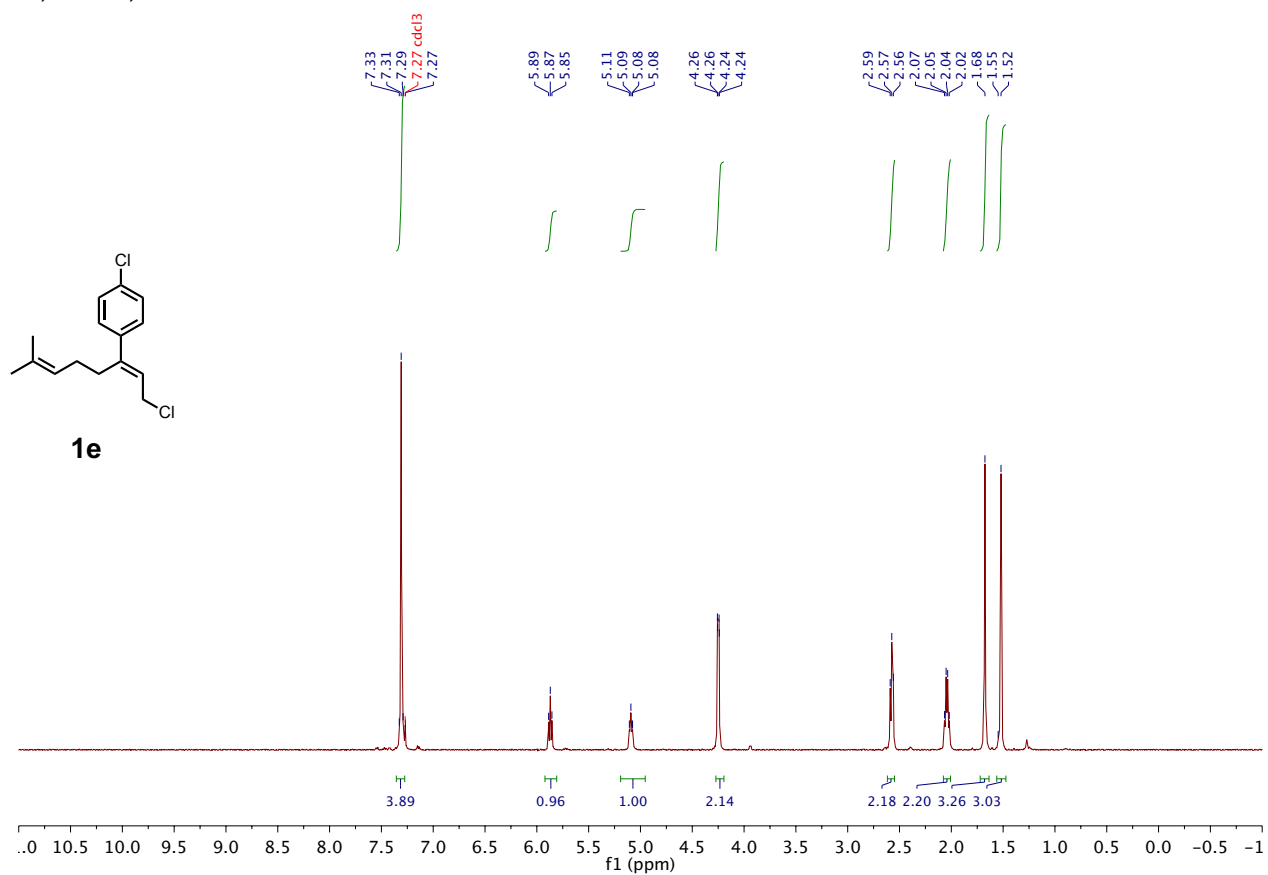

$^{13}\text{C}$  NMR,  $\text{CDCl}_3$ , 126 MHz

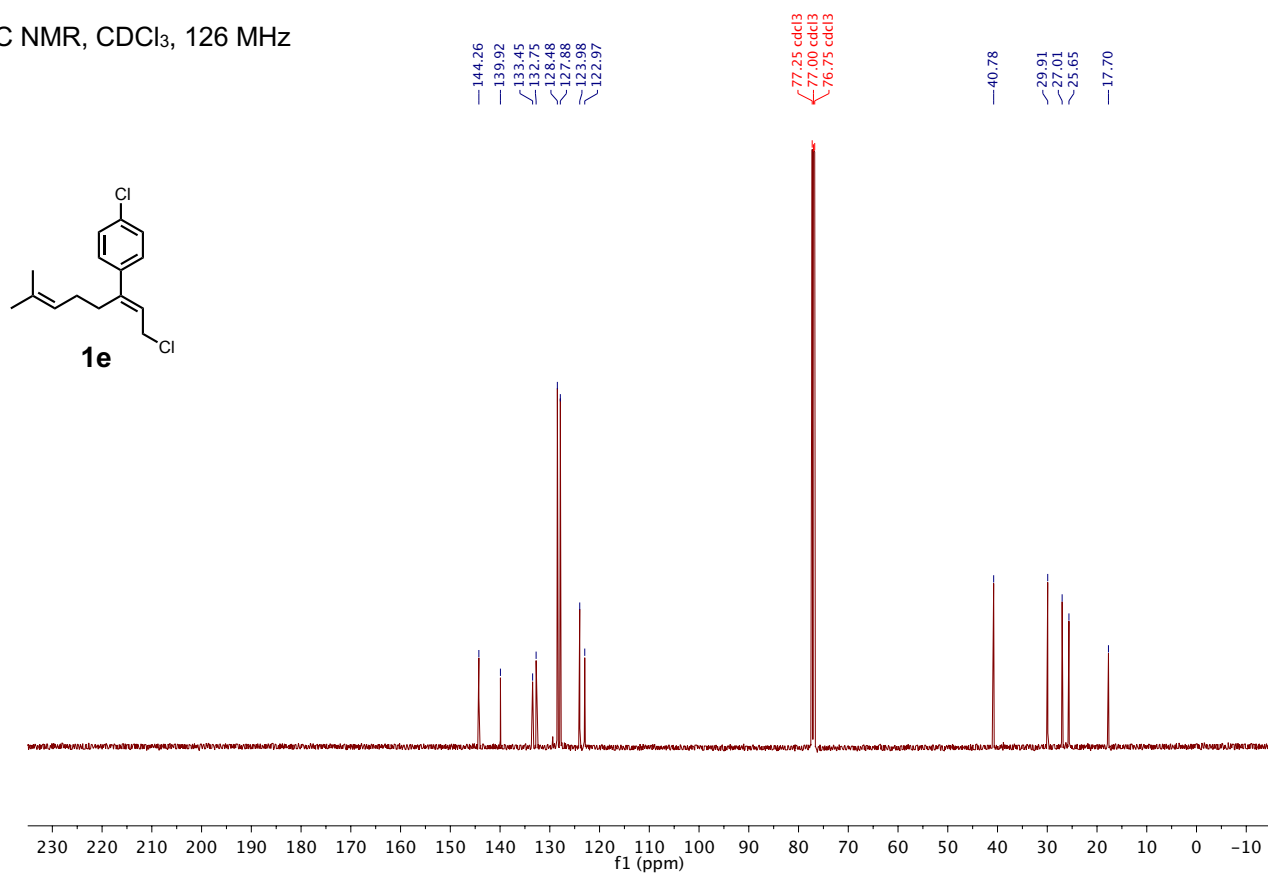

<sup>1</sup>H NMR, CDCl<sub>3</sub>, 500 MHz

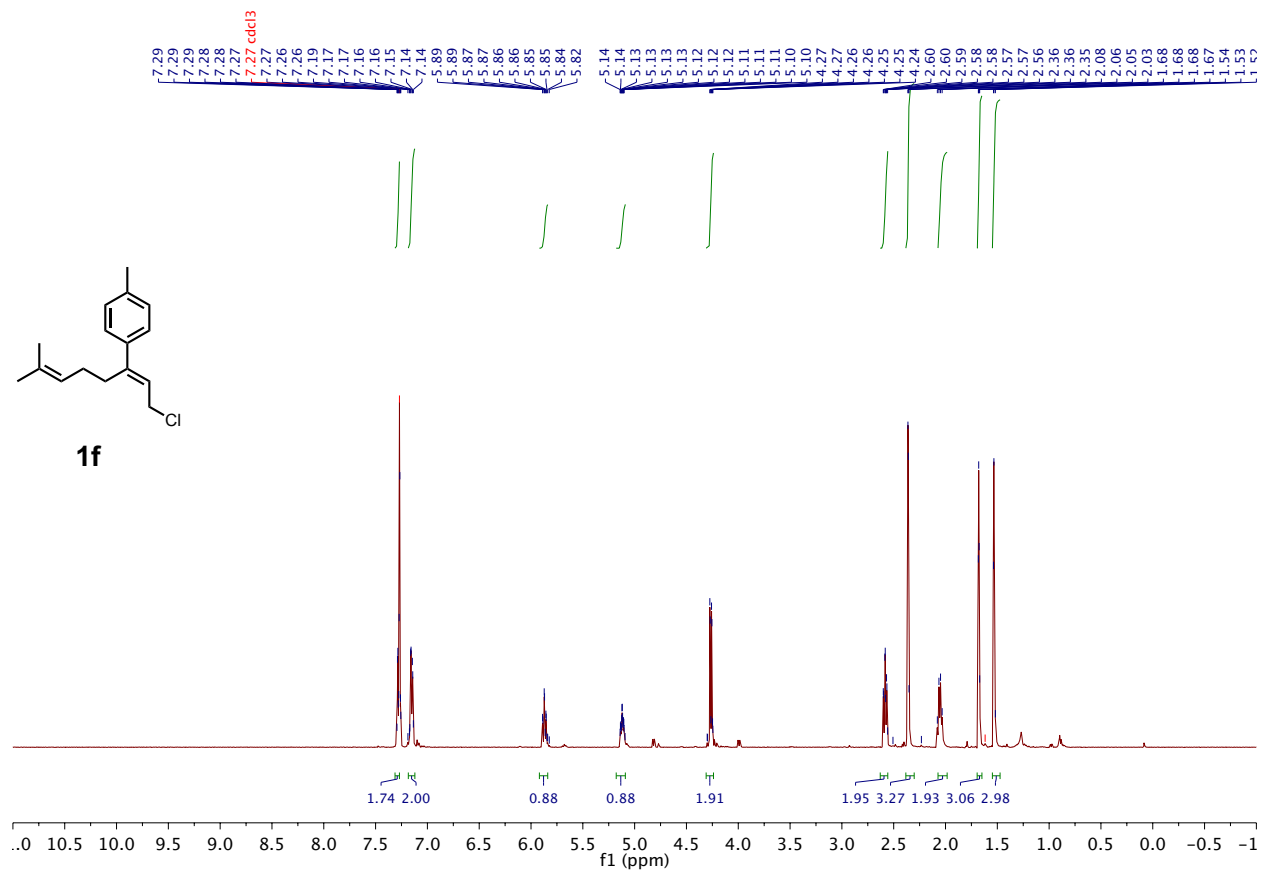

<sup>13</sup>C NMR, CDCl<sub>3</sub>, 126 MHz

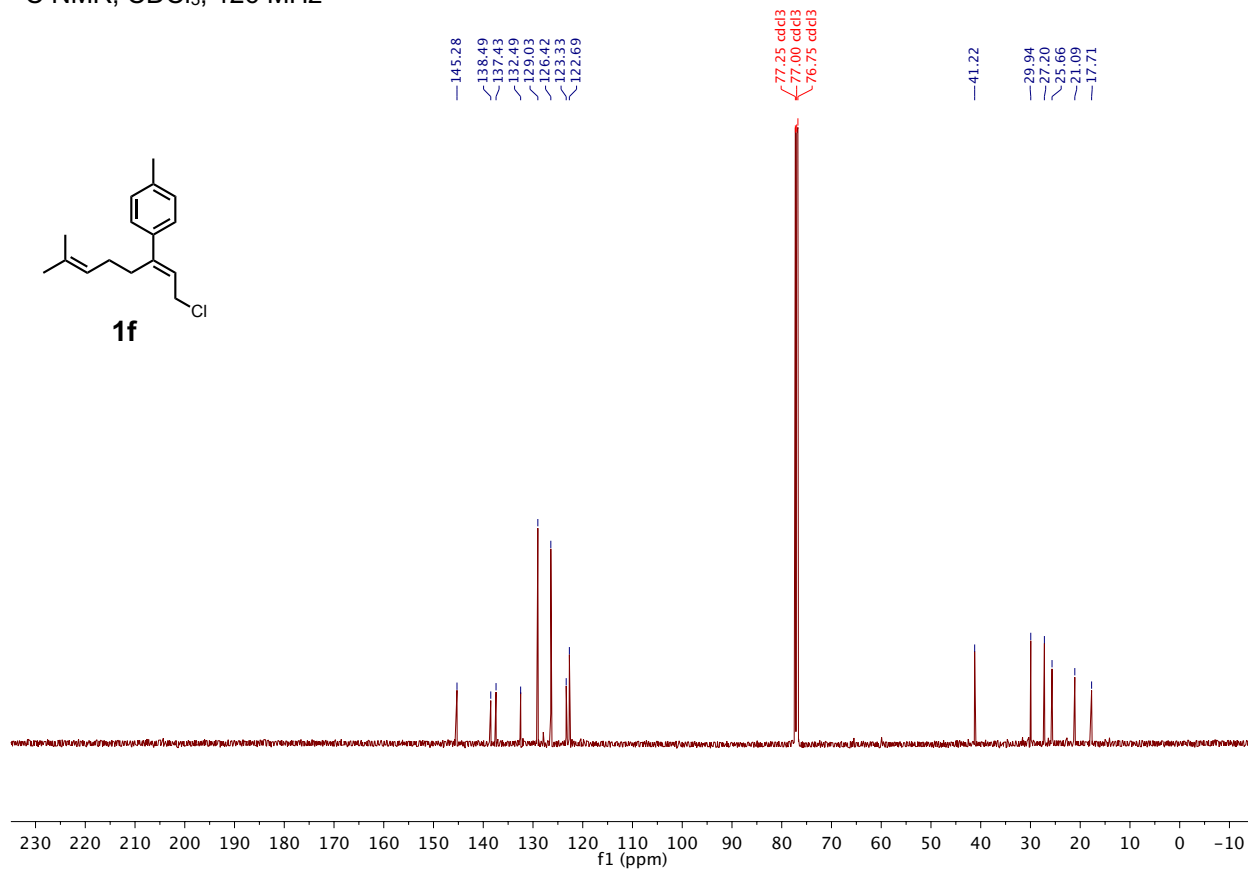

<sup>1</sup>H NMR, CDCl<sub>3</sub>, 500 MHz

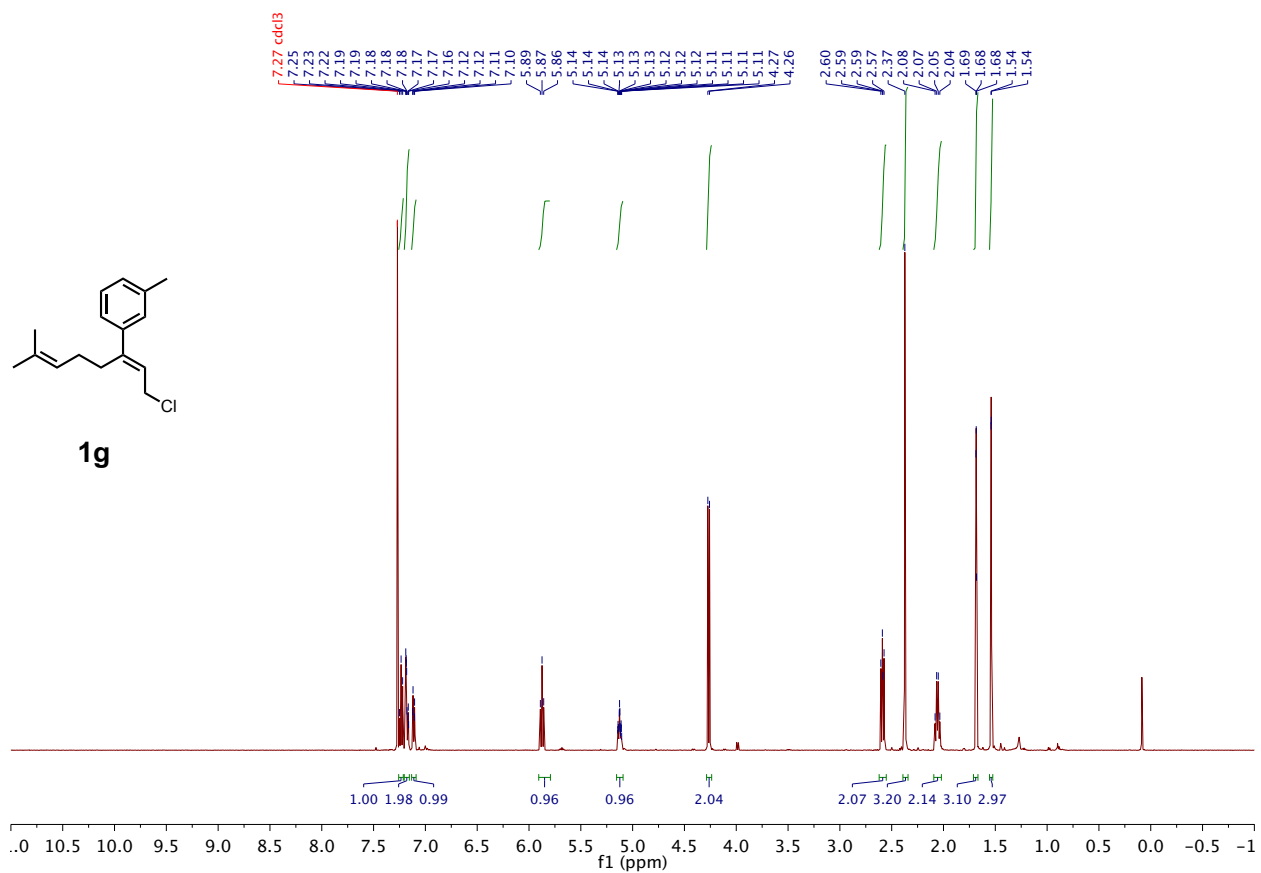

<sup>13</sup>C NMR, CDCl<sub>3</sub>, 126 MHz

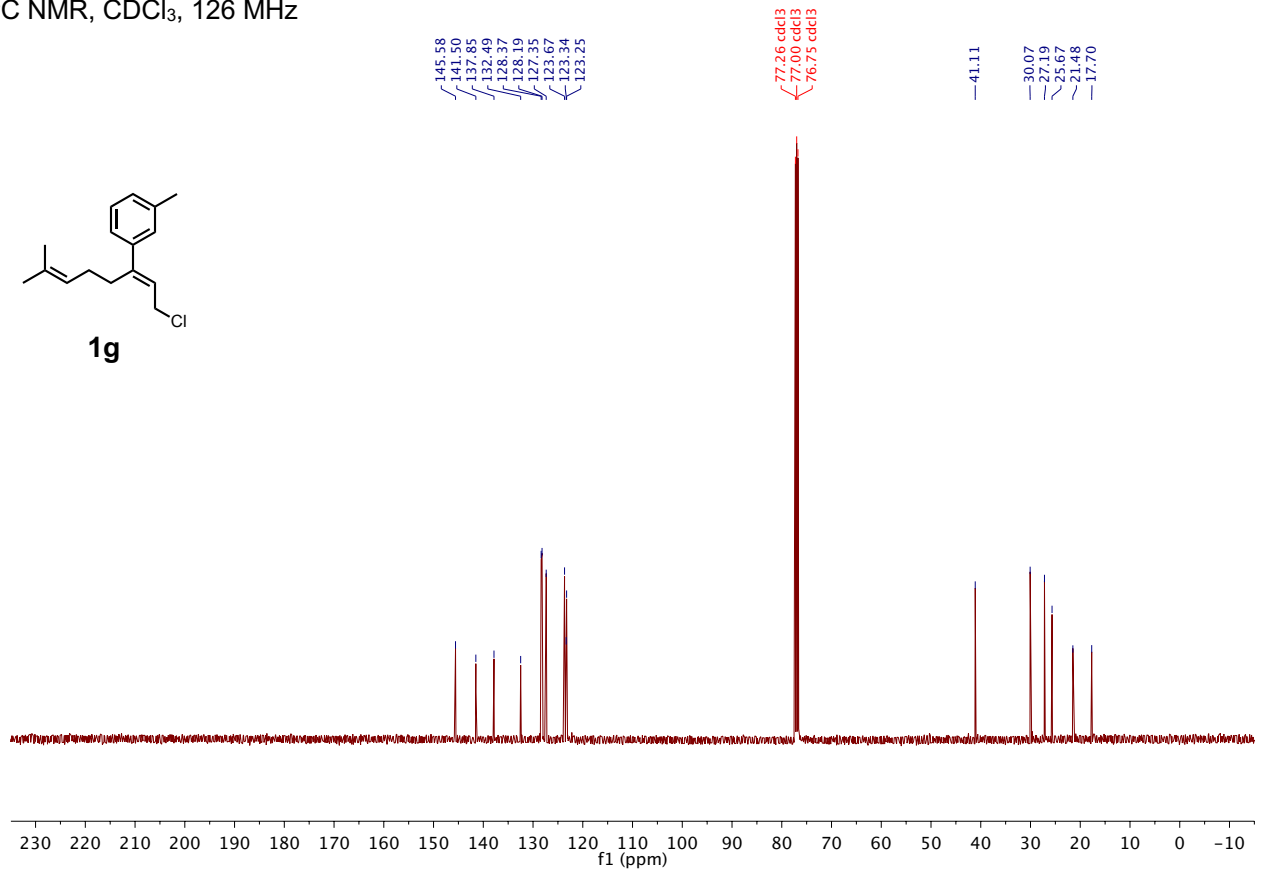

$^1\text{H}$  NMR,  $\text{CDCl}_3$ , 600 MHz

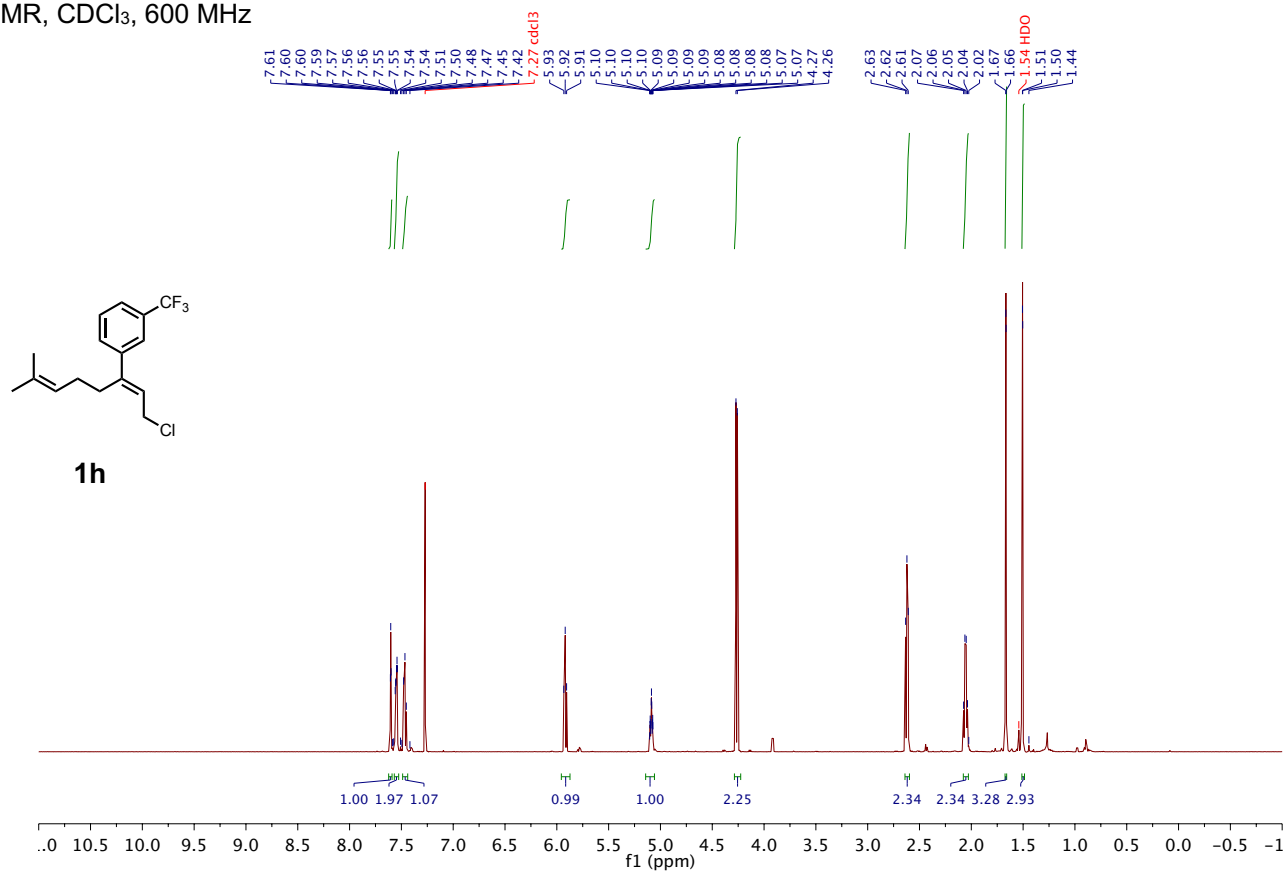

$^{13}\text{C}$  NMR,  $\text{CDCl}_3$ , 126 MHz

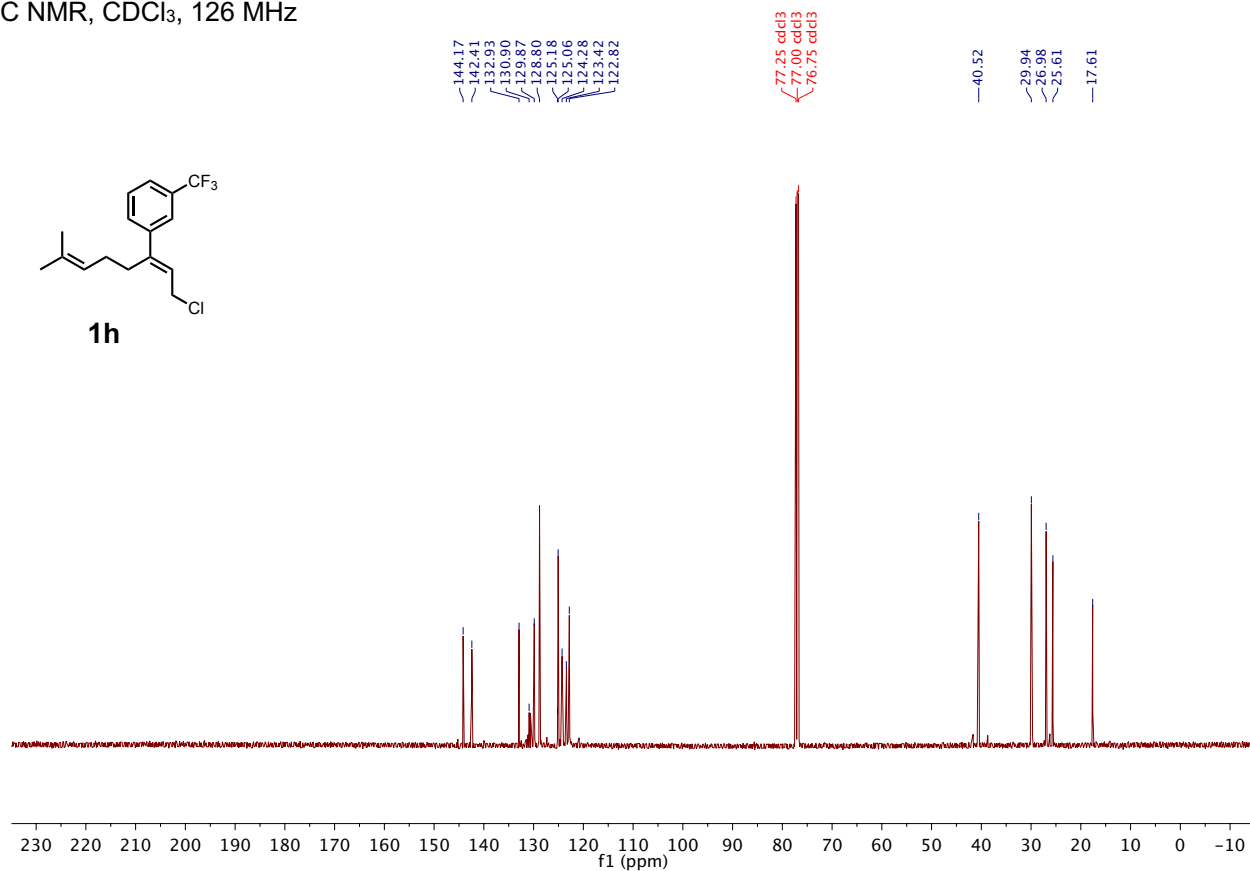

$^{19}\text{F}$  NMR,  $\text{CDCl}_3$ , 471 MHz

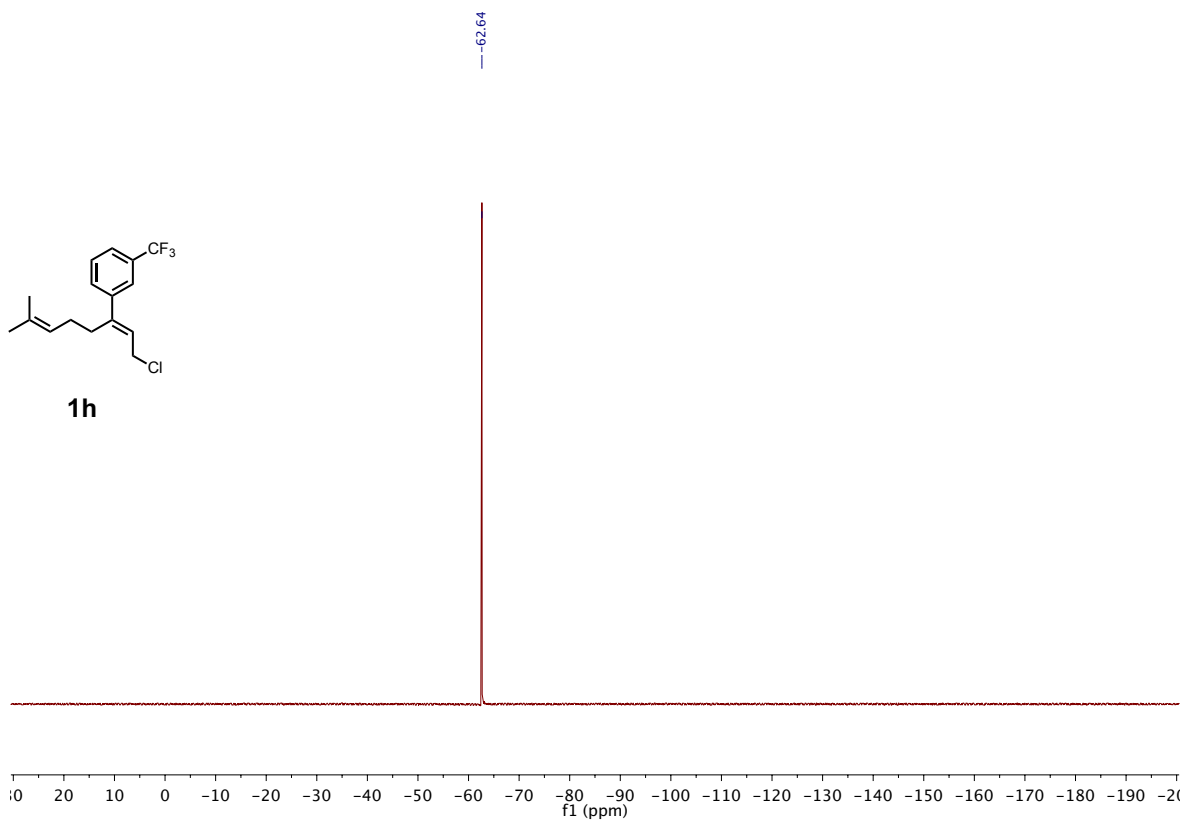



7.27 cdcl3  
 5.42  
 5.41  
 5.39  
 5.12  
 5.12  
 4.13  
 4.12  
 4.11  
 4.11  
 4.11  
 4.10  
 4.09  
 4.08  
 4.07  
 4.06  
 4.06  
 3.91  
 3.91  
 1.90  
 1.89  
 1.88  
 1.87  
 1.86  
 1.86  
 1.81  
 1.80  
 1.79  
 1.78  
 1.77  
 1.76  
 1.76  
 1.75  
 1.75  
 1.73  
 1.73  
 1.72  
 1.72  
 1.70  
 1.70  
 1.69  
 1.69  
 1.67  
 1.67  
 1.63  
 1.62  
 1.62  
 1.61  
 1.29  
 1.29  
 1.28  
 1.27  
 1.26  
 1.26  
 1.25  
 1.24  
 1.24  
 1.23  
 1.23  
 1.21  
 1.21  
 1.20  
 1.19  
 1.19  
 1.18  
 1.17  
 1.17  
 1.16  
 1.16  
 1.15  
 1.15  
 1.14  
 1.13  
 1.12  
 1.12

<sup>1</sup>H NMR, CDCl<sub>3</sub>, 500 MHz

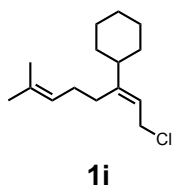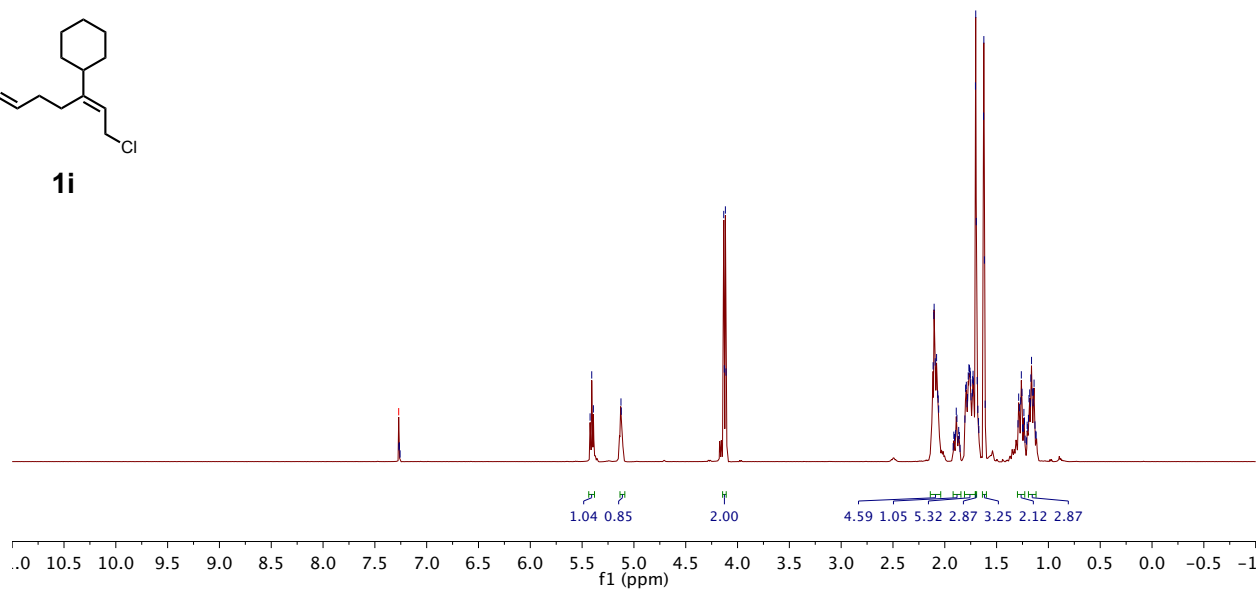

<sup>13</sup>C NMR, CDCl<sub>3</sub>, 126 MHz

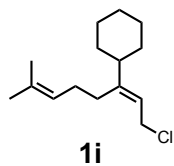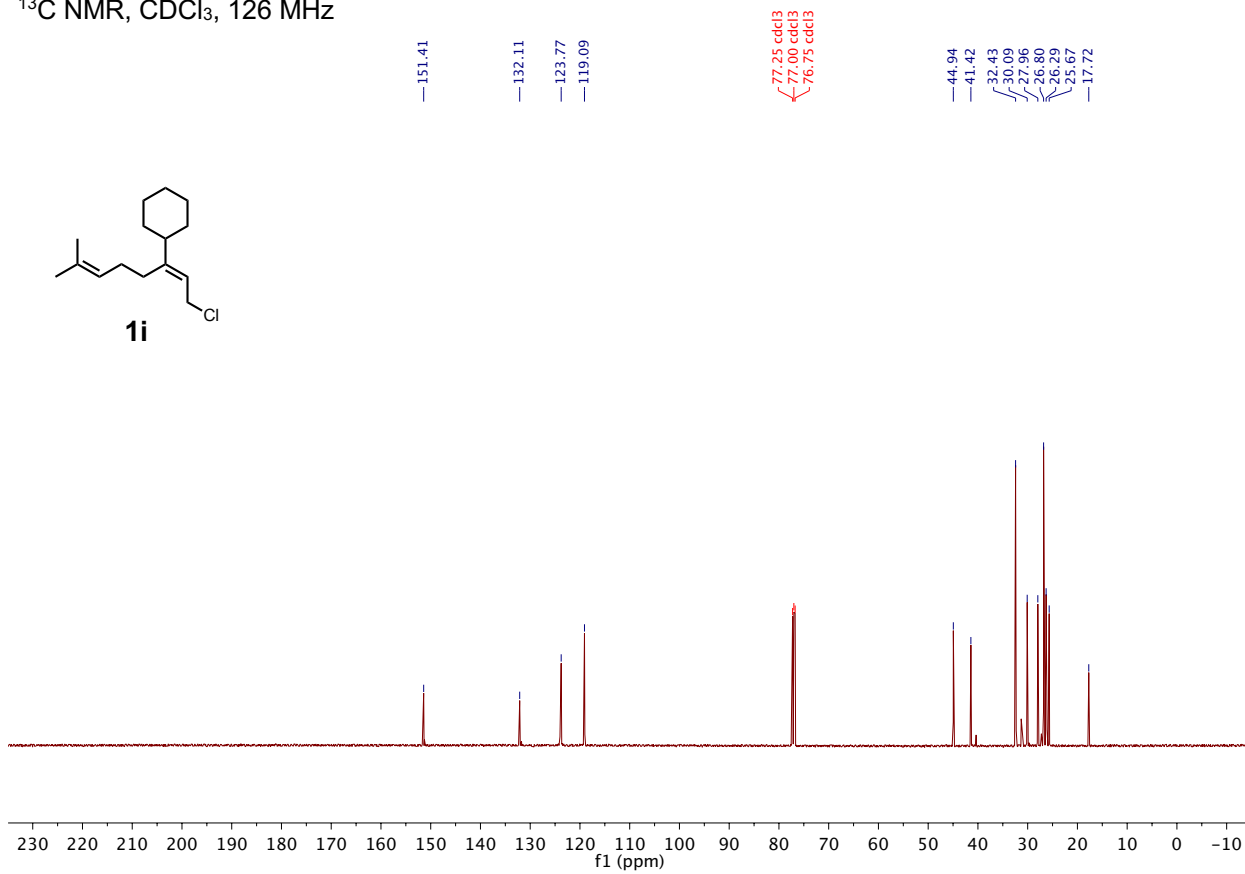

<sup>1</sup>H NMR, CDCl<sub>3</sub>, 500 MHz

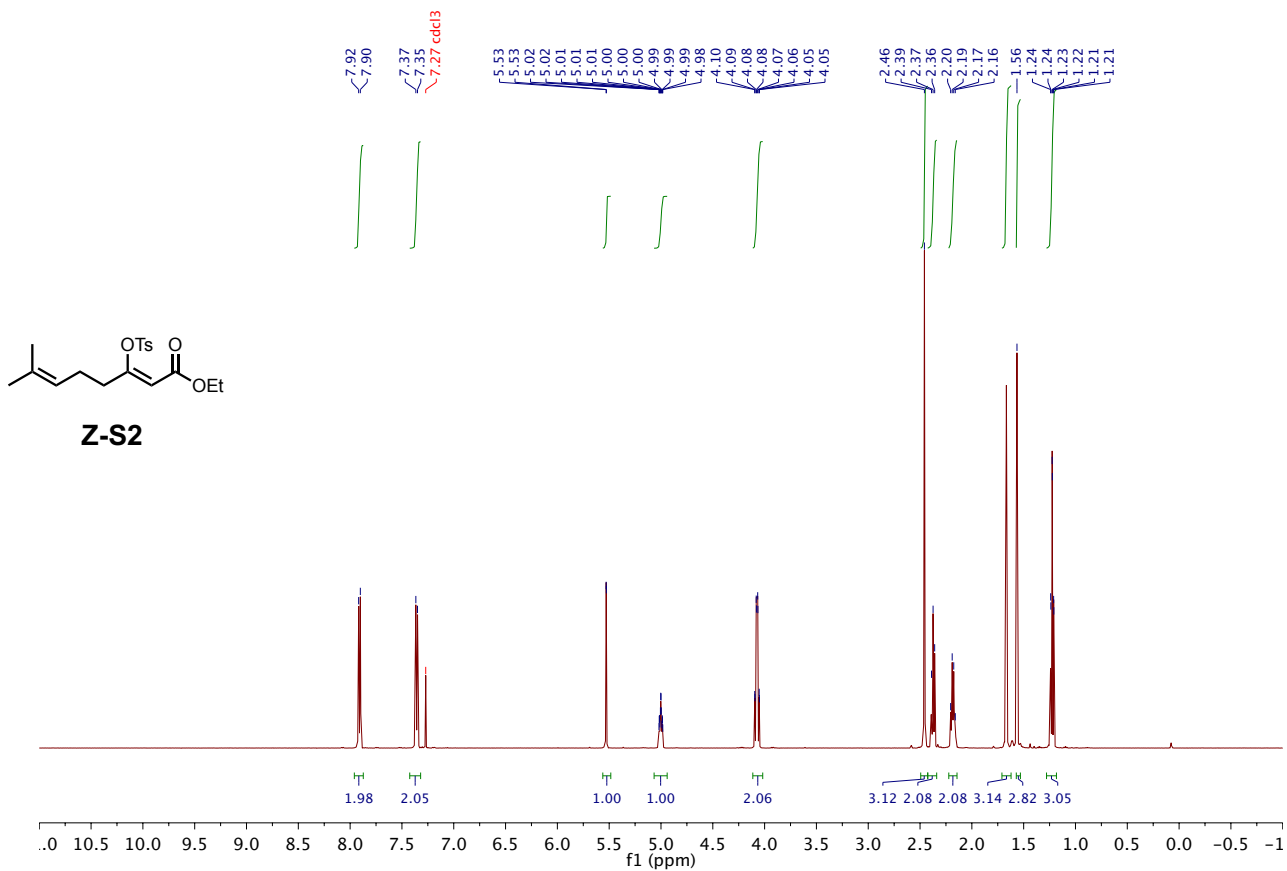

<sup>13</sup>C NMR, CDCl<sub>3</sub>, 126 MHz

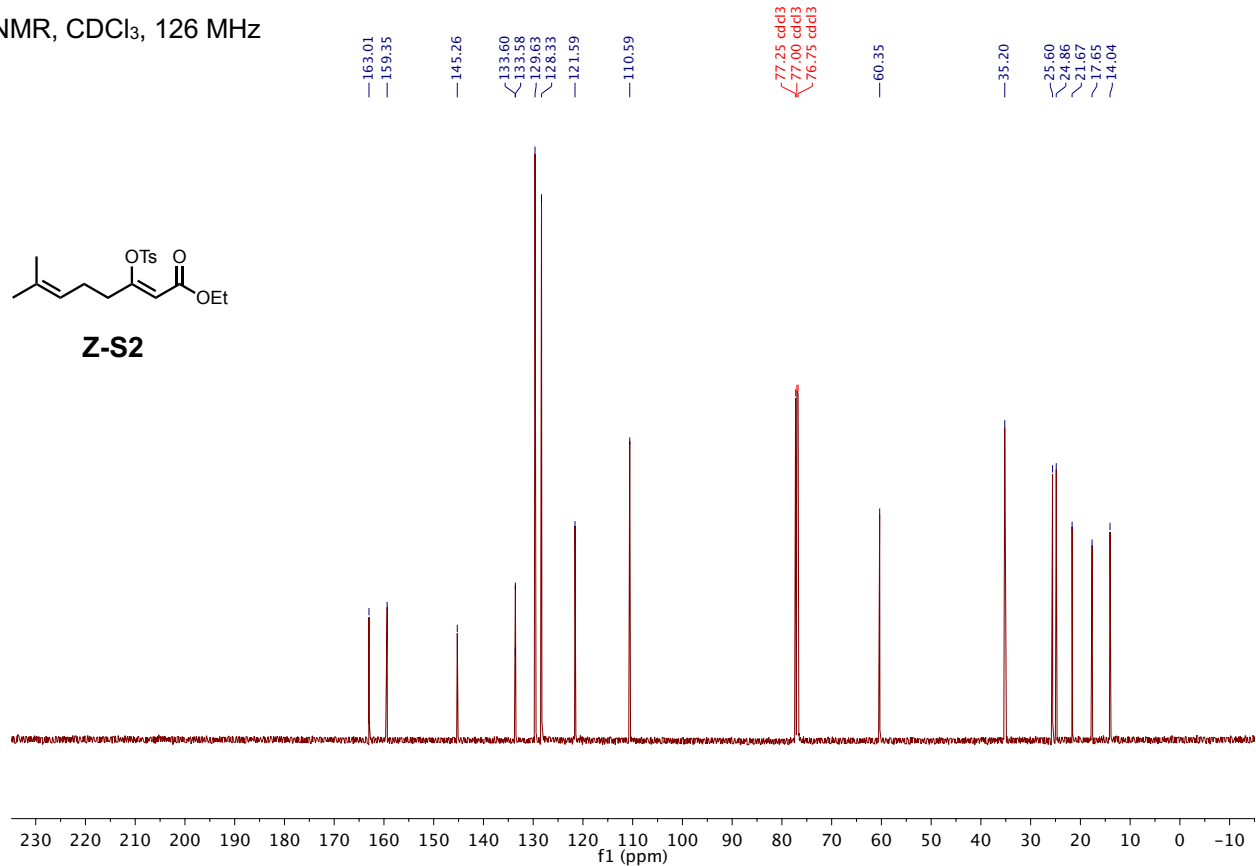

<sup>1</sup>H NMR, CDCl<sub>3</sub>, 500 MHz

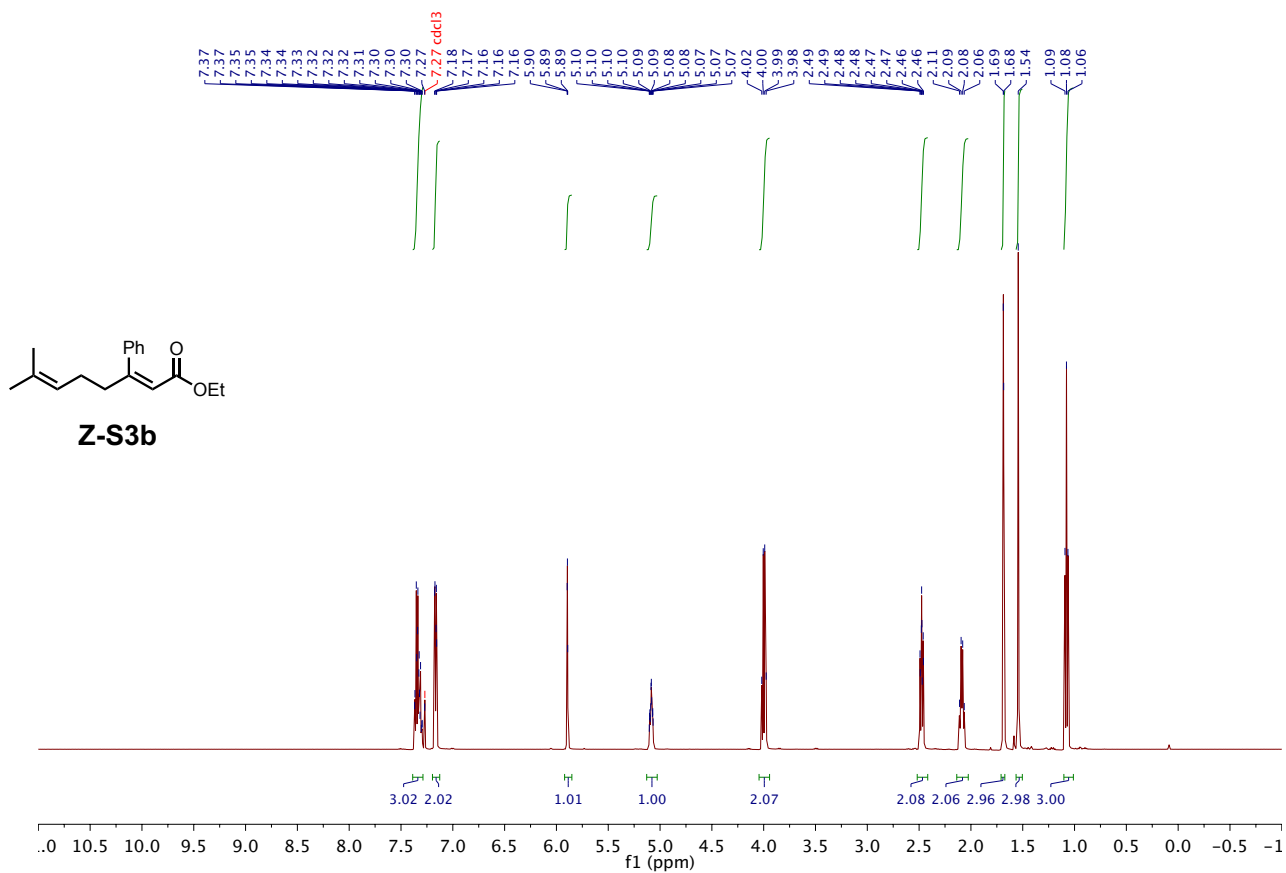

<sup>13</sup>C NMR, CDCl<sub>3</sub>, 126 MHz

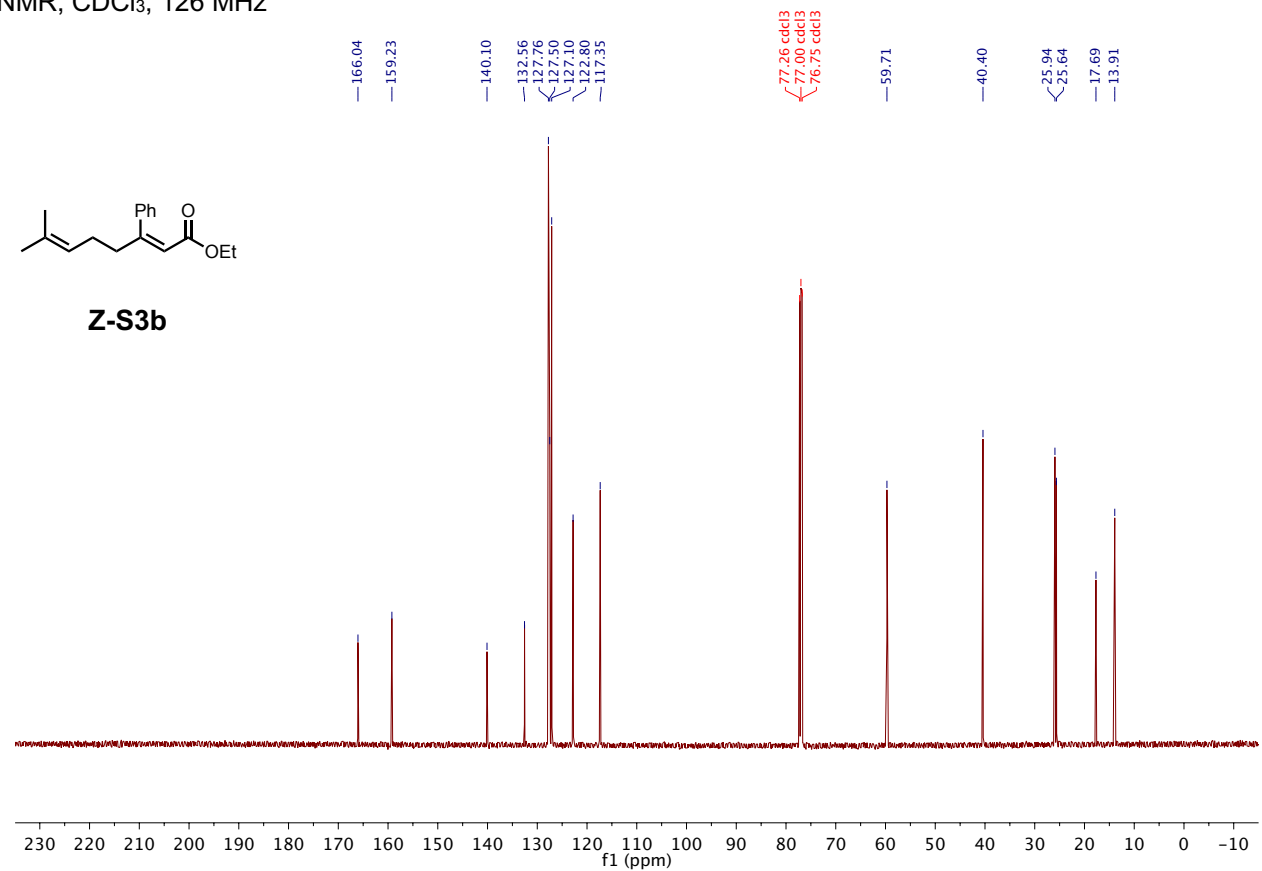

<sup>1</sup>H NMR, CDCl<sub>3</sub>, 500 MHz

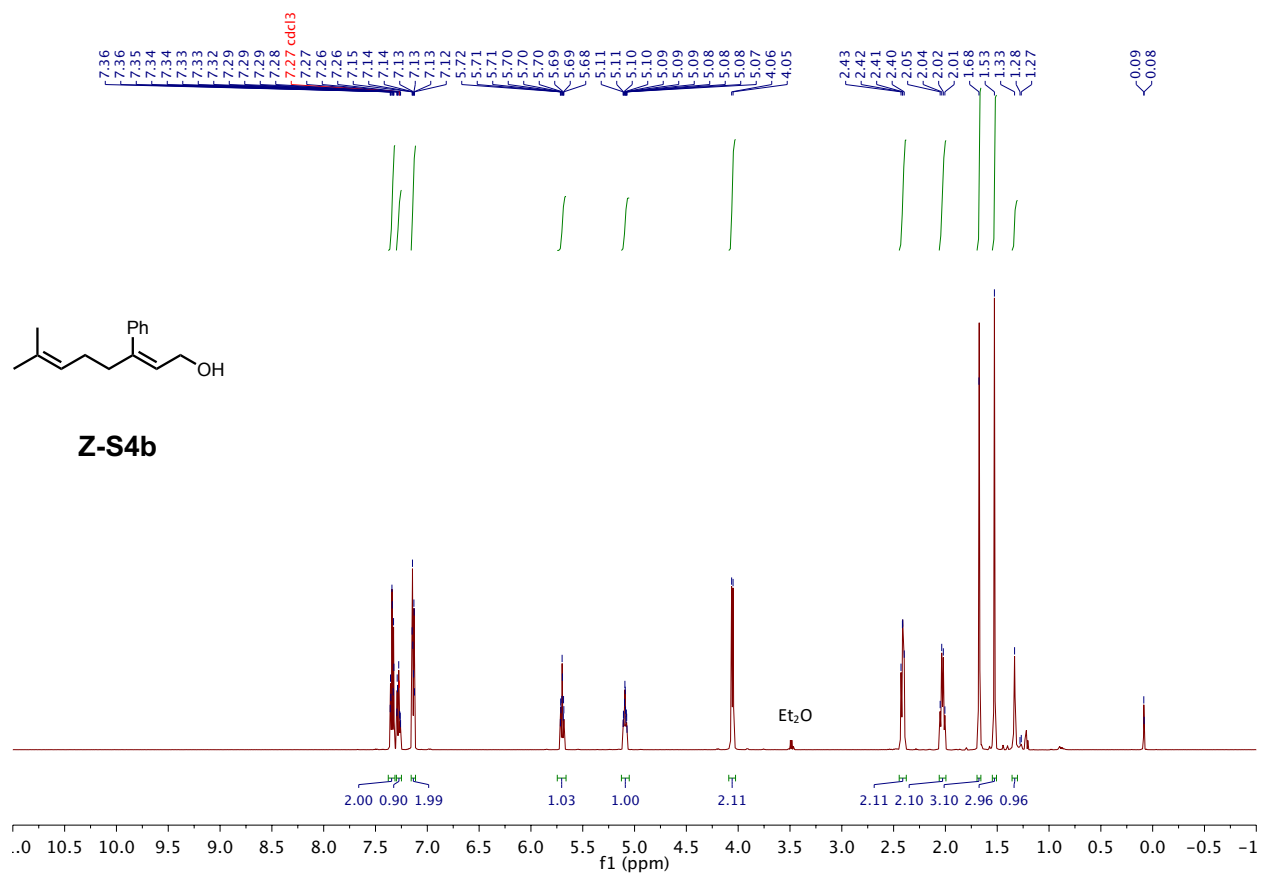

<sup>13</sup>C NMR, CDCl<sub>3</sub>, 126 MHz

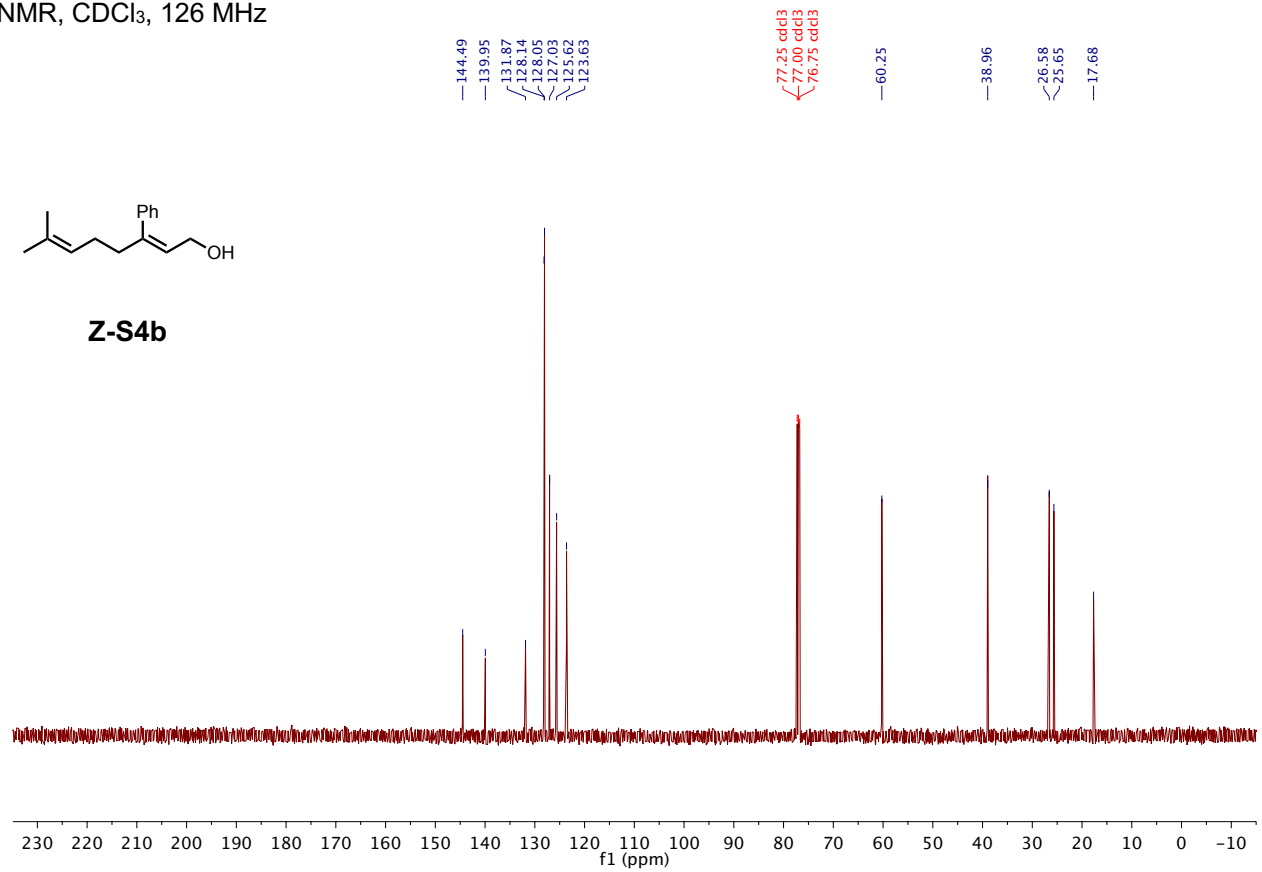

$^1\text{H}$  NMR,  $\text{CDCl}_3$ , 500 MHz

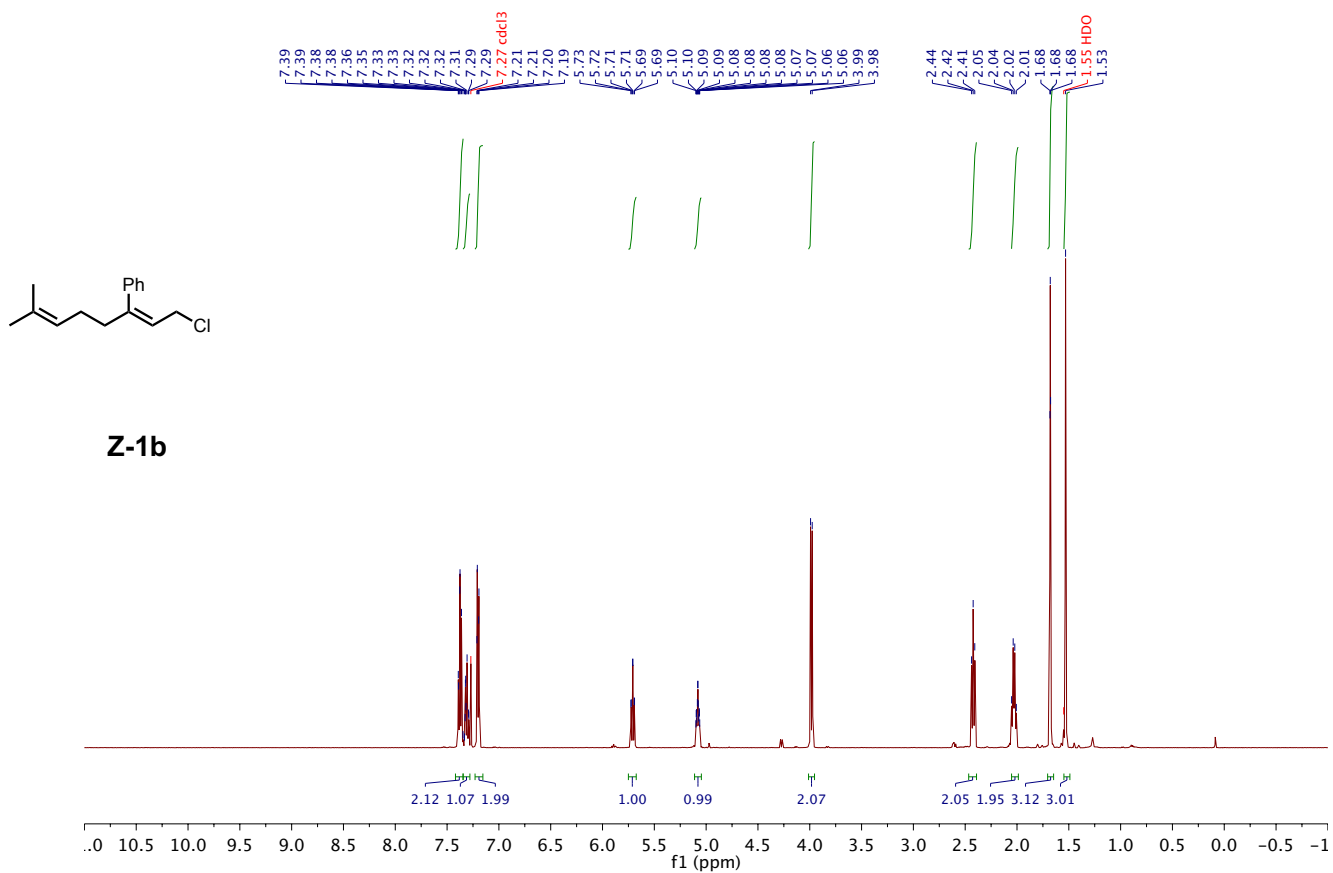

$^{13}\text{C}$  NMR,  $\text{CDCl}_3$ , 126 MHz

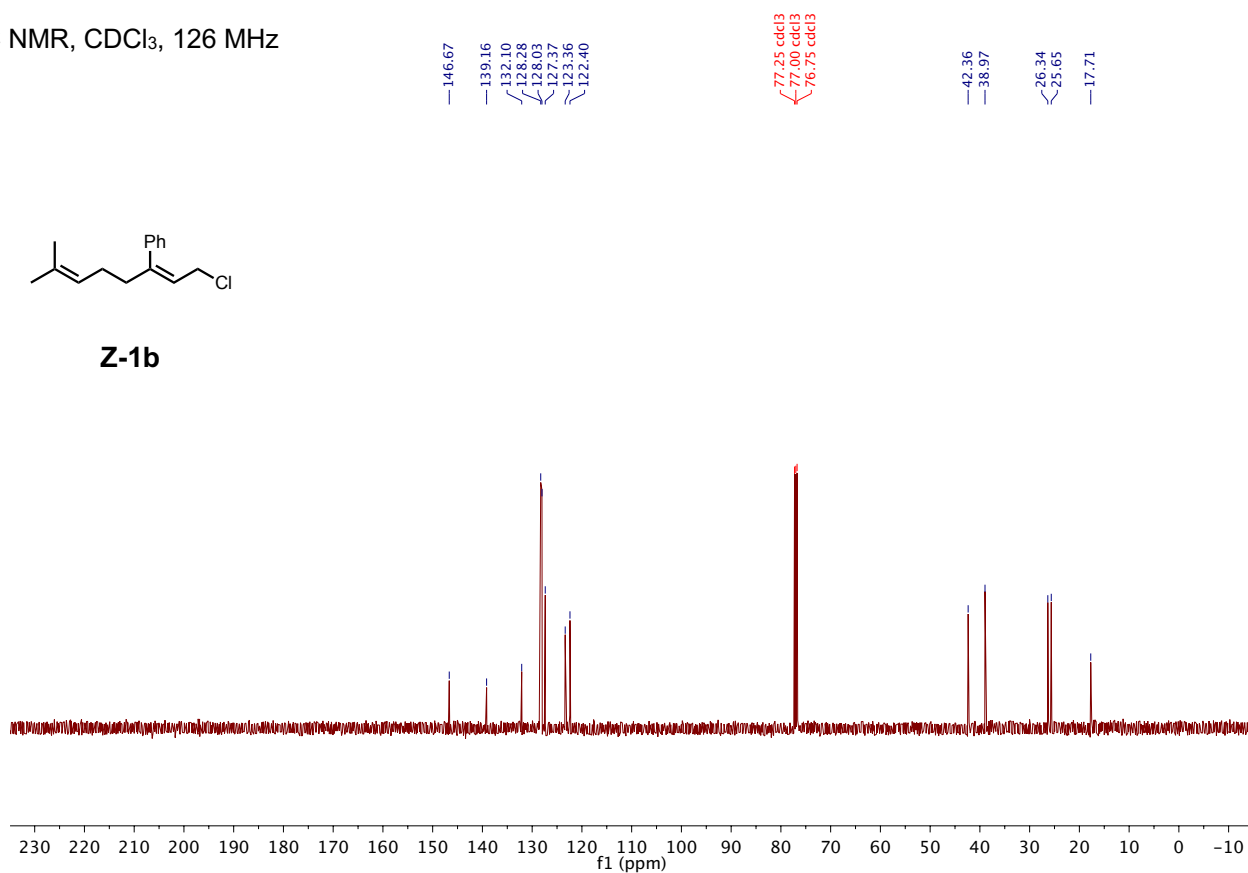

purified reaction of 1b (CDCl<sub>3</sub>, 600 MHz)

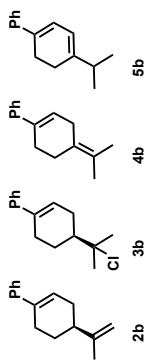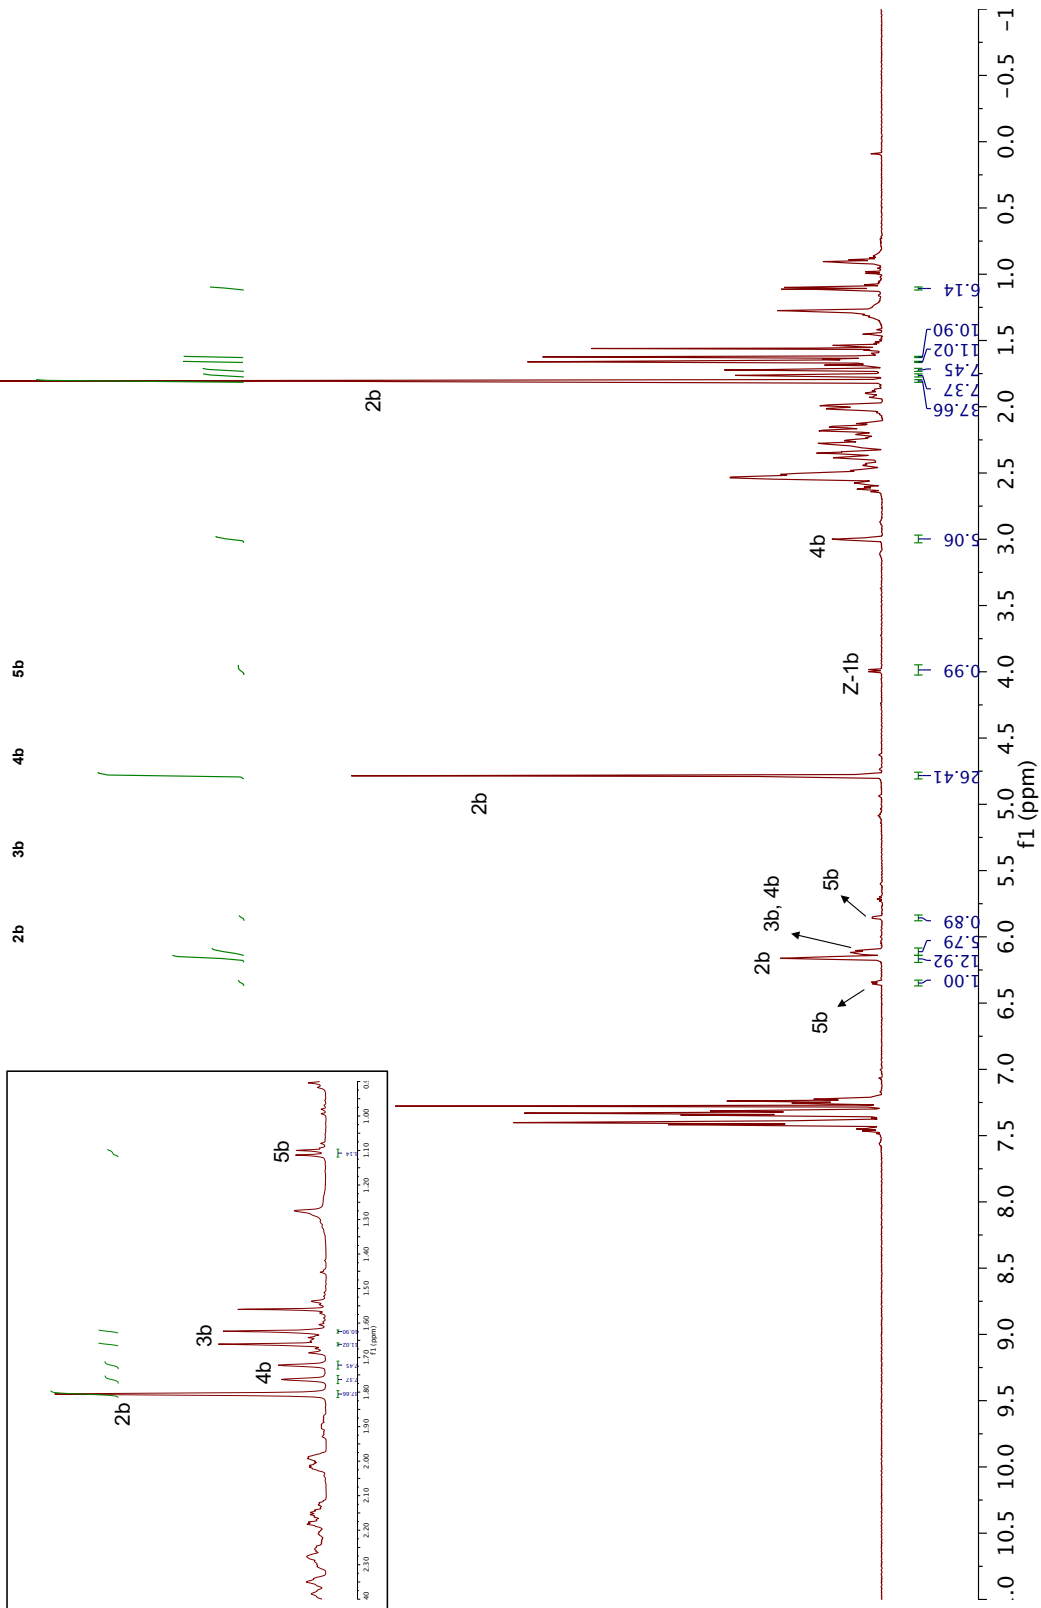

<sup>1</sup>H NMR, CDCl<sub>3</sub>, 500 MHz

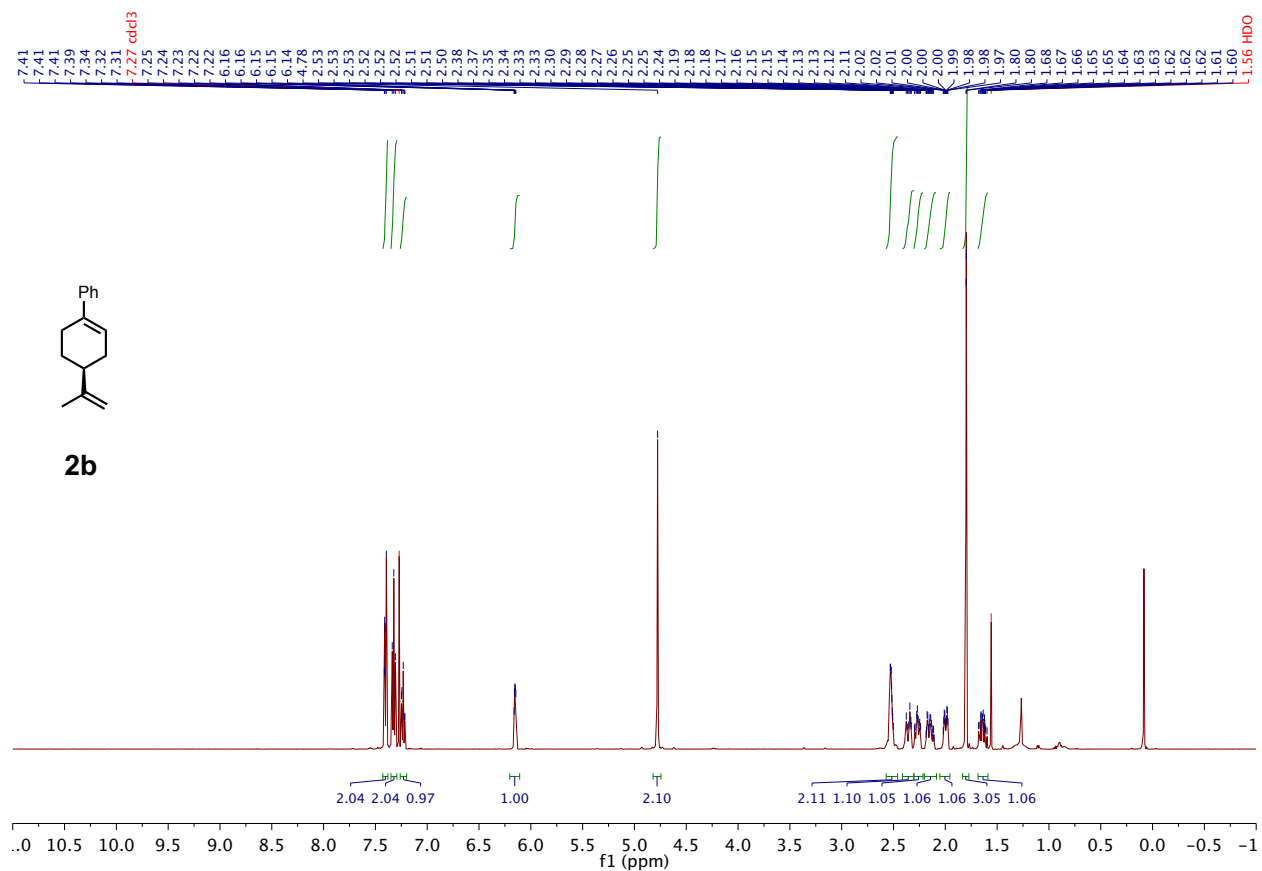

<sup>13</sup>C NMR, CDCl<sub>3</sub>, 126 MHz

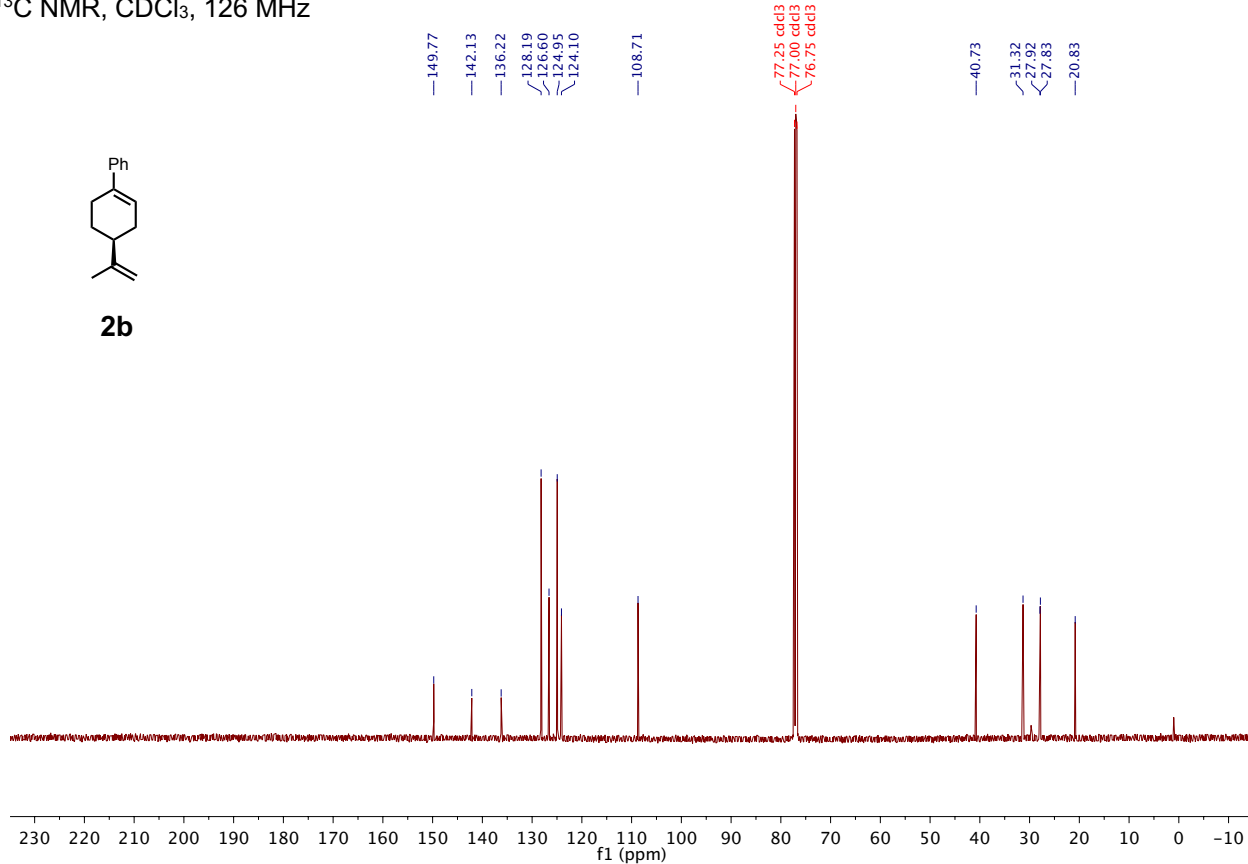

<sup>1</sup>H NMR, CDCl<sub>3</sub>, 500 MHz

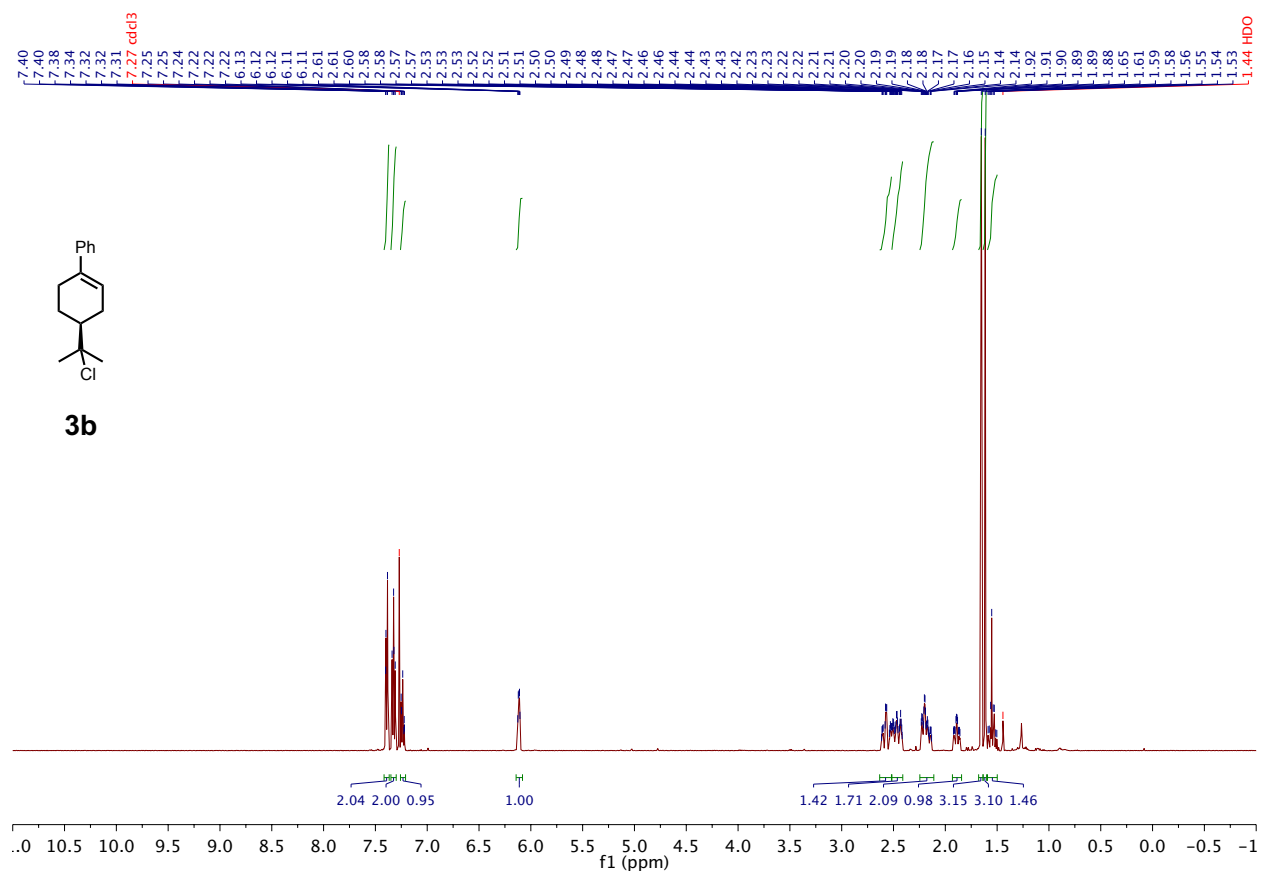

<sup>13</sup>C NMR, CDCl<sub>3</sub>, 126 MHz

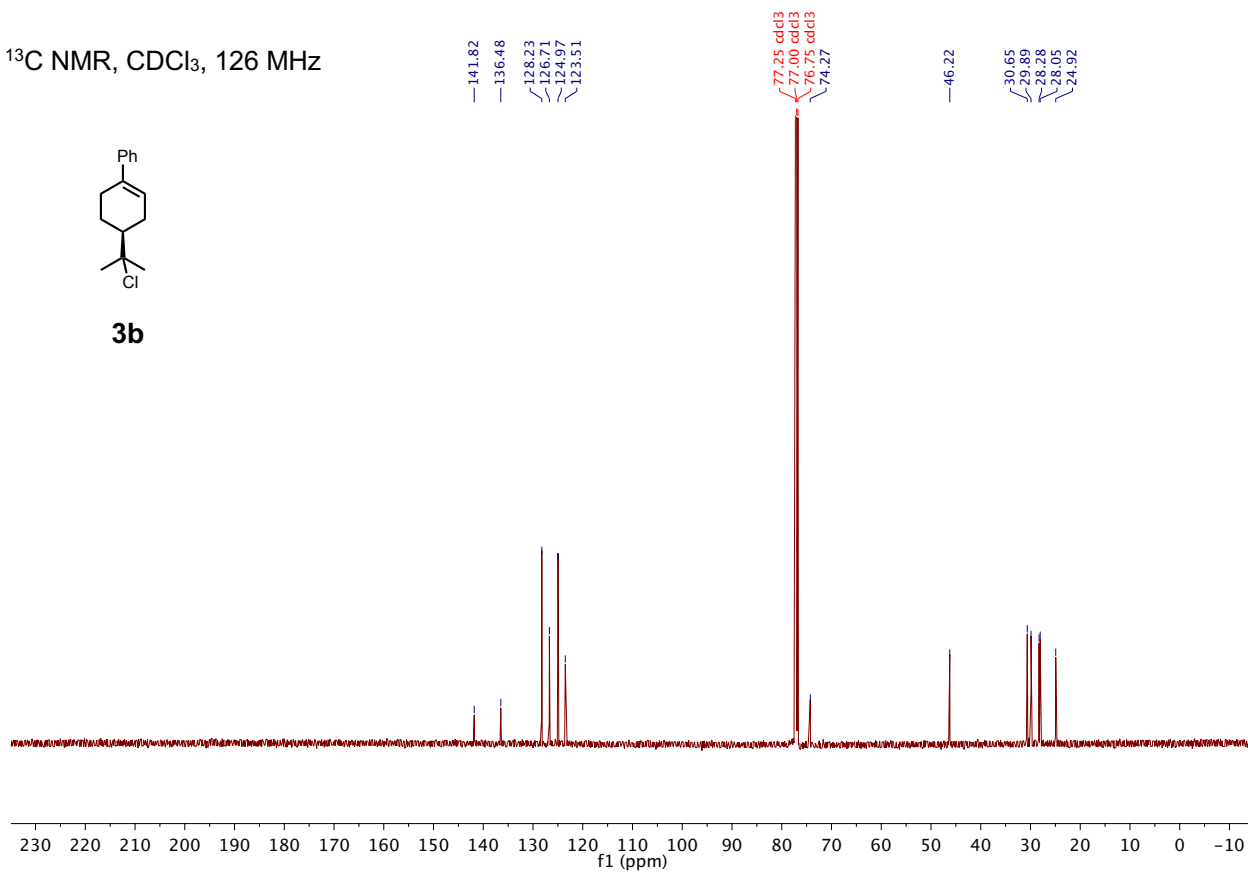



$^1\text{H}$  NMR,  $\text{CDCl}_3$ , 500 MHz

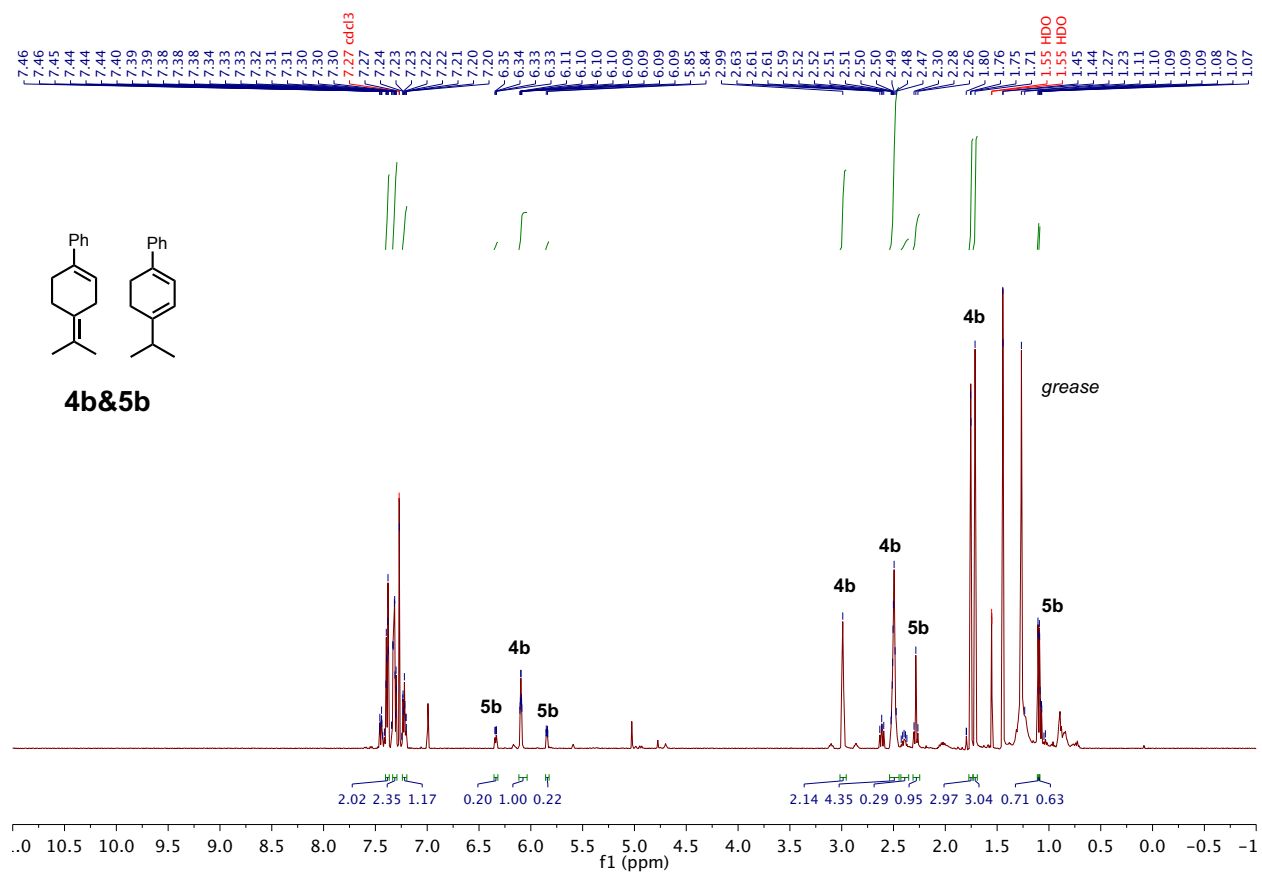

$^{13}\text{C}$  NMR,  $\text{CDCl}_3$ , 126 MHz

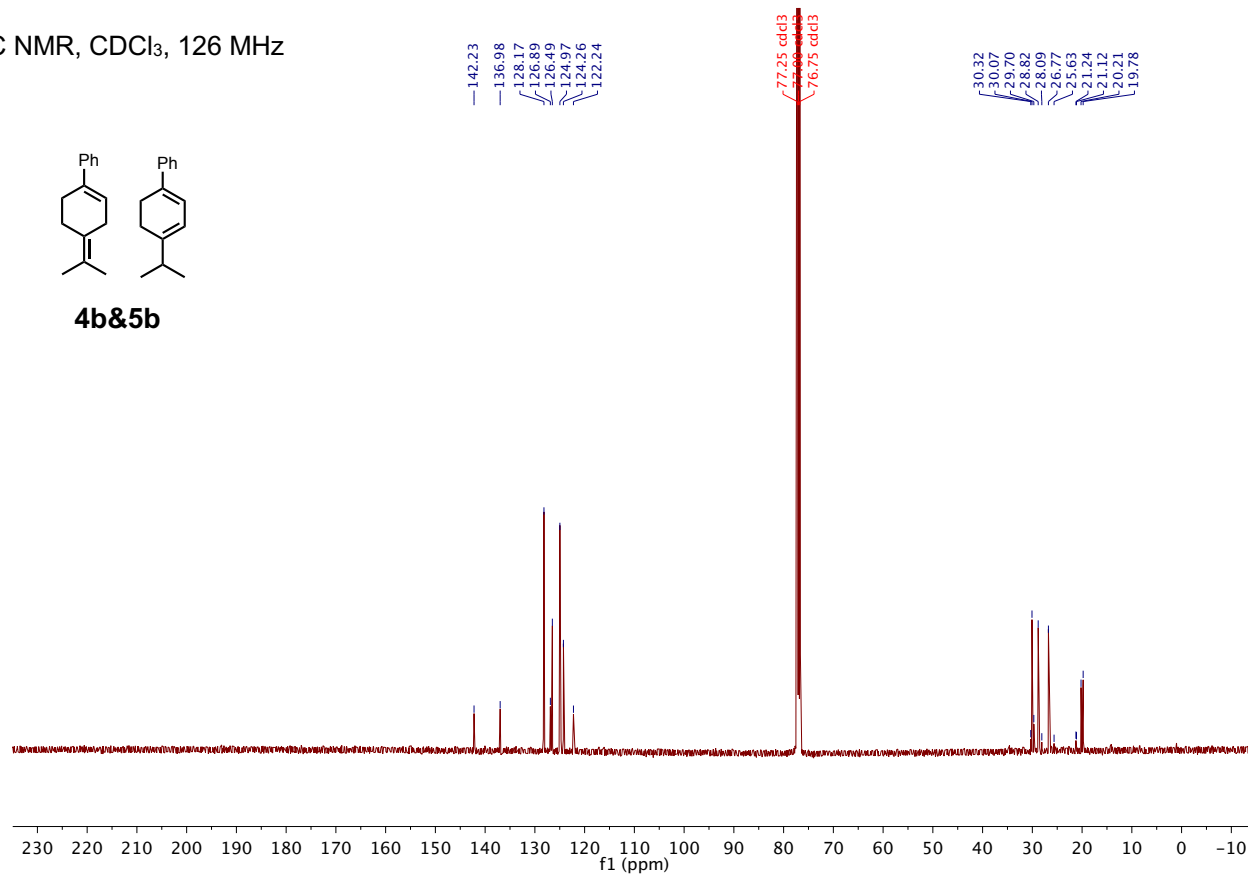

comparison of mixture of 4b&5b to monoterpene natural products (CDCl<sub>3</sub>, 600 MHz)

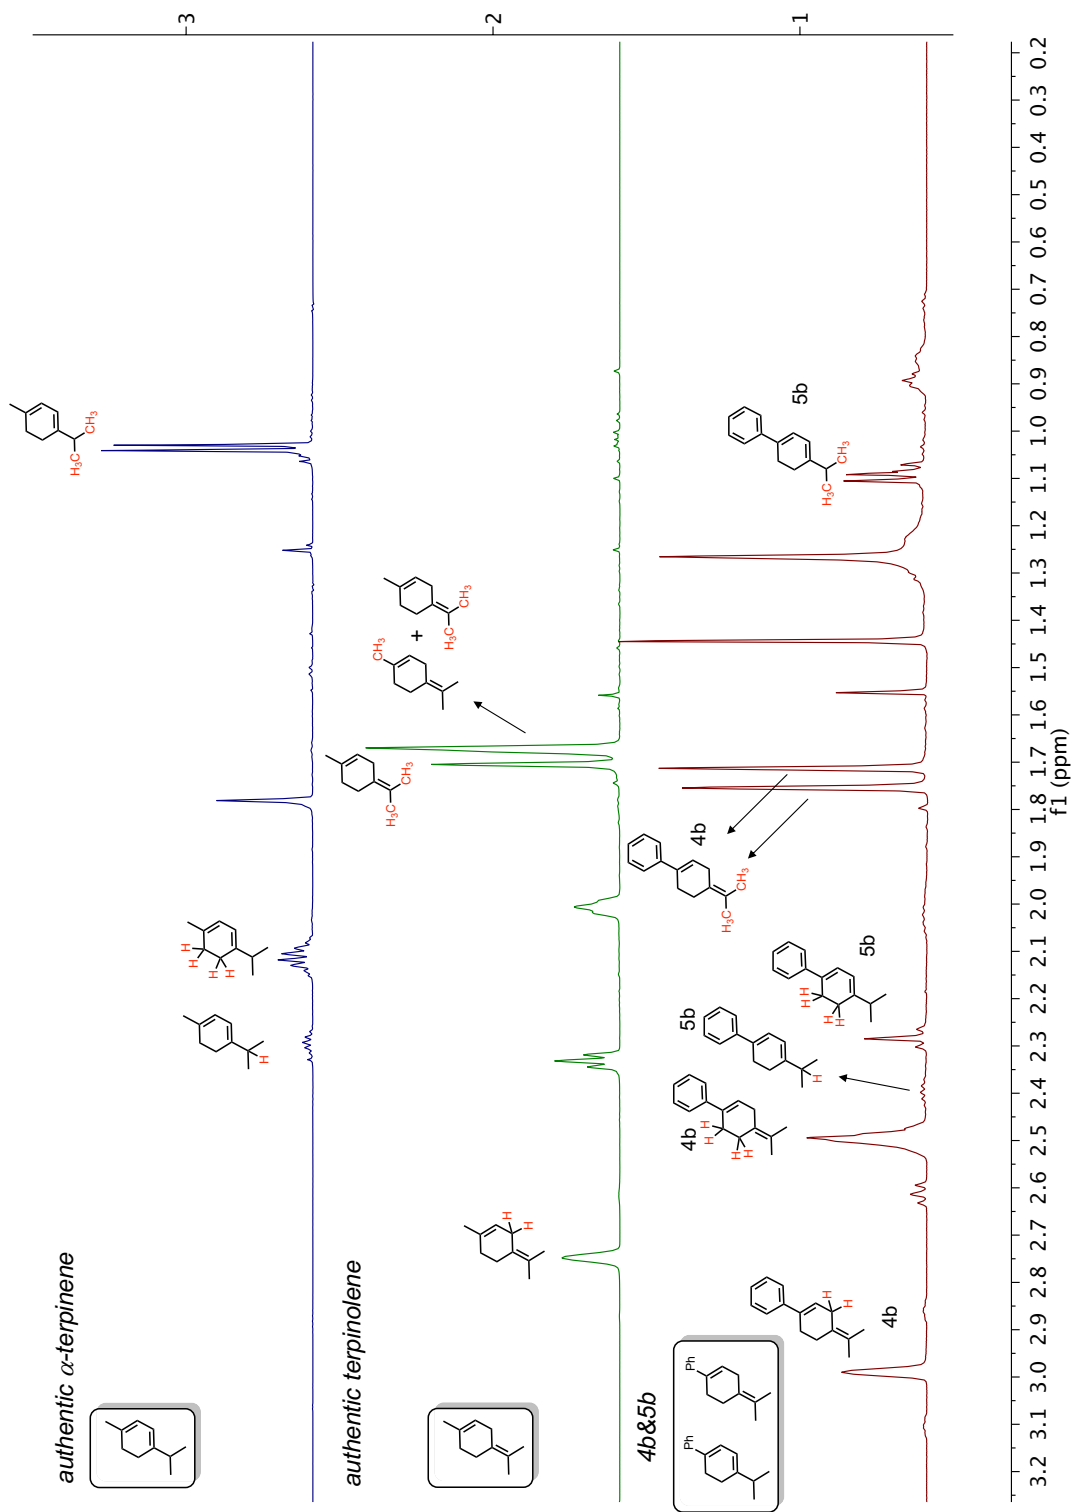

<sup>1</sup>H NMR, CDCl<sub>3</sub>, 500 MHz

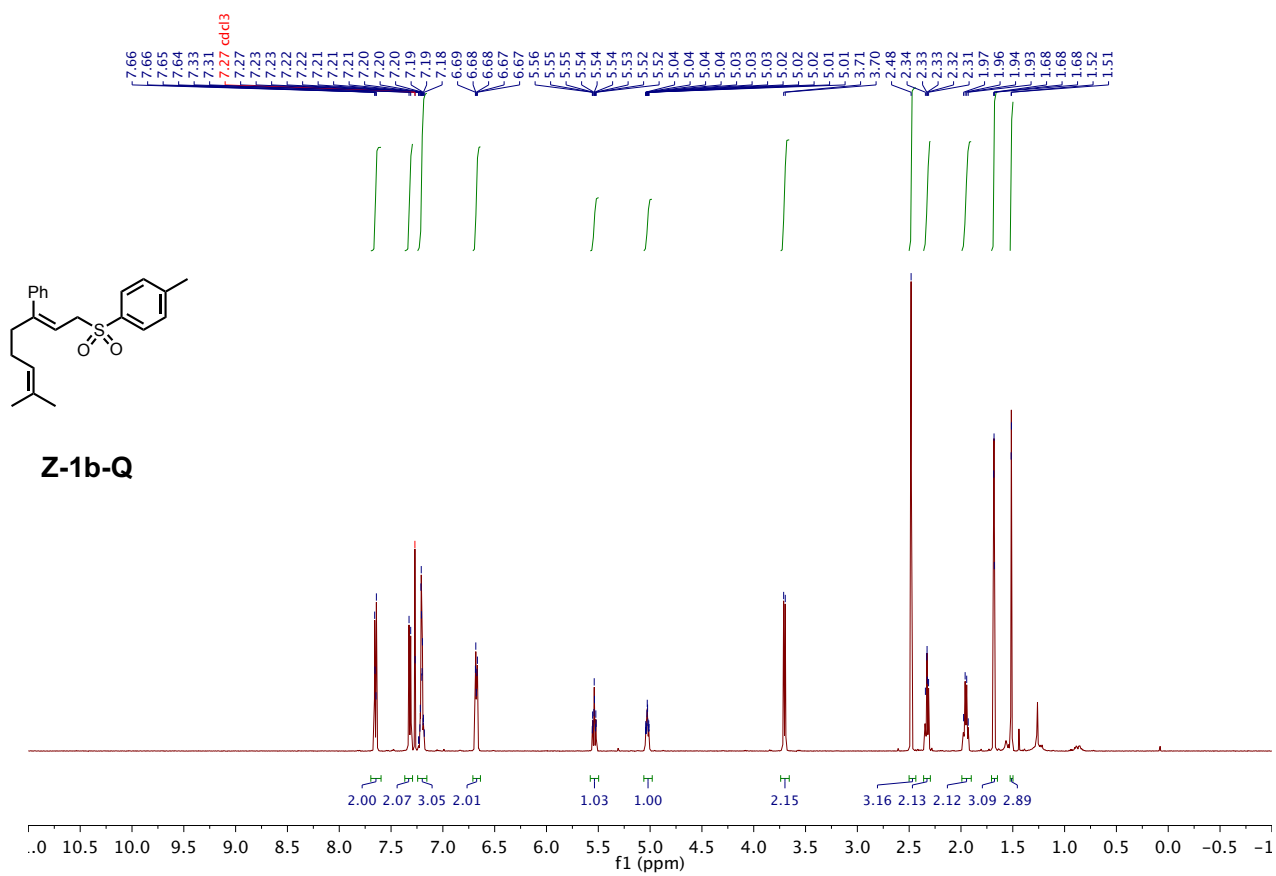

<sup>13</sup>C NMR, CDCl<sub>3</sub>, 126 MHz

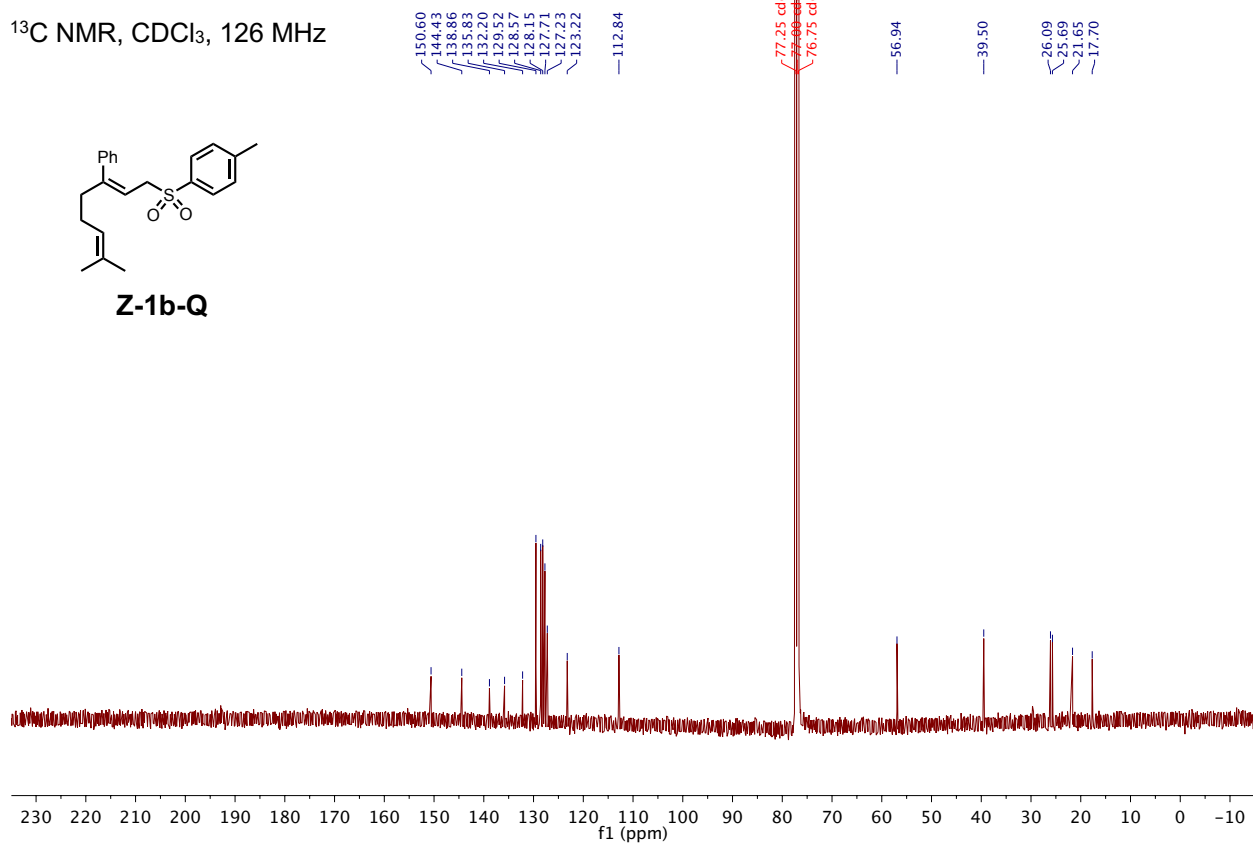

## 12. Computations

Density functional theory (DFT) calculations were performed with Gaussian 16.<sup>10</sup> The size of the system limited the number of structures that could be computed, but as thorough as possible searches were performed of catalyst conformations, substrate conformations, and relative binding orientations of the catalyst and substrate. Catalyst **7b** was used for the computational modeling since it was nearly as enantioselective as **7a** but contained fewer atoms, making it easier to compute. Substrate **1d** was used since the presence of the electron withdrawing group shortened the breaking C-Cl bond, which resulted in significantly easier optimization of transition states than for more electron rich substrates. Geometry optimizations and vibrational frequency calculations were performed at the B3LYP/6-31G(d) level of theory.<sup>11</sup> The choice of this model chemistry was based on the use of B3LYP in studies on cyclase chemistry by Tantillo and co-workers.<sup>12</sup> Free energy corrections were determined at the B3LYP/6-31G(d) level of theory at 298.15 K using Grimme's quasi-harmonic free energy correction.<sup>13</sup> In addition, the default Gaussian free energy correction and Truhlar's quasi-harmonic free energy correction<sup>14</sup> were calculated and are reported in Table S2. Quasi-harmonic corrections were computed using the GoodVibes Python package.<sup>15</sup> Single point energy refinements were determined at PCM-(Cyclohexane)-B3LYP-D3(BJ)/6-311+G(d,p).<sup>11,16</sup> Additional single-point energies were calculated for the lowest energy structure leading to each enantiomer of product and are reported in Table S2.<sup>16d,17</sup>

Transitions states with electronic energy differences of <0.1 kcal/mol were visually inspected for differences. If no differences could be identified, then only the lowest energy structure (based on single-point electronic energies) was retained (see Table S1 for a complete list of transition structures). All transition states were verified by the presence of one imaginary frequency. When possible, the imaginary frequency was inspected visually to ensure it corresponded to C-Cl bond breaking/C-C bond formation. However, the imaginary frequency for each of the three lowest energy transition structures leading to the minor enantiomer of product was very small, rendering their interpretation difficult. We suspect this is the consequence of a relatively flat potential energy surface for the key C-C bond forming event, which is a common feature in cyclase chemistry.<sup>18</sup> Non-covalent interaction analyses<sup>19</sup> were performed using Multiwfn software package NCIplot<sup>20</sup> with a box of grid data set visually using a GUI window. Structures were illustrated using CYLview v1.0.565 beta,<sup>21</sup> except in the case of the NCI analyses, where they were illustrated using VMD 1.9.3.<sup>22</sup>

| Name    | G[PCM(CyH)-B3LYP-D3(BJ)/6-311+G(d,p)//B3LYP/6-31G(d)] (Hartree) | $\Delta\Delta G_{\text{rel}}^{\ddagger}$ (kcal/mol) | Name    | G[PCM(CyH)-B3LYP-D3(BJ)/6-311+G(d,p)//B3LYP/6-31G(d)] (Hartree) | $\Delta\Delta G_{\text{rel}}^{\ddagger}$ (kcal/mol) |
|---------|-----------------------------------------------------------------|-----------------------------------------------------|---------|-----------------------------------------------------------------|-----------------------------------------------------|
| TS-S-1  | -5532.3442580                                                   | 0.00                                                | TS-R-1  | -5532.3401350                                                   | 2.59                                                |
| TS-S-2  | -5532.3430930                                                   | 0.73                                                | TS-R-2  | -5532.3376340                                                   | 4.16                                                |
| TS-S-3  | -5532.3428500                                                   | 0.88                                                | TS-R-3  | -5532.3375850                                                   | 4.19                                                |
| TS-S-4  | -5532.3406490                                                   | 2.26                                                | TS-R-4  | -5532.3366120                                                   | 4.80                                                |
| TS-S-5  | -5532.3403260                                                   | 2.47                                                | TS-R-5  | -5532.3361110                                                   | 5.11                                                |
| TS-S-6  | -5532.3398160                                                   | 2.79                                                | TS-R-6  | -5532.3338120                                                   | 6.55                                                |
| TS-S-7  | -5532.3394860                                                   | 2.99                                                | TS-R-7  | -5532.3330730                                                   | 7.02                                                |
| TS-S-8  | -5532.3284300                                                   | 9.93                                                | TS-R-8  | -5532.3330180                                                   | 7.05                                                |
| TS-S-9  | -5532.3246870                                                   | 12.28                                               | TS-R-9  | -5532.3286510                                                   | 9.79                                                |
| TS-S-10 | -5532.3238250                                                   | 12.82                                               | TS-R-10 | -5532.3103610                                                   | 21.27                                               |
| TS-S-11 | -5532.3229250                                                   | 13.39                                               |         |                                                                 |                                                     |
| TS-S-12 | -5532.3215220                                                   | 14.27                                               |         |                                                                 |                                                     |
| TS-S-13 | -5532.3207140                                                   | 14.77                                               |         |                                                                 |                                                     |
| TS-S-14 | -5532.3150020                                                   | 18.36                                               |         |                                                                 |                                                     |
| TS-S-15 | -5532.3133070                                                   | 19.42                                               |         |                                                                 |                                                     |
| TS-S-16 | -5532.3129070                                                   | 19.67                                               |         |                                                                 |                                                     |

**Table S1.** Computed transition structures. All geometry optimizations and vibrational frequency calculations were conducted at B3LYP/6-31G(d). Grimme's quasi-RRHO free energy correction was applied and single-point refinement of the electronic energy was performed at PCM-(CyH)-B3LYP-D3(BJ)/6-311+G(d,p). The relative free energies are defined relative to that of TS-S-1. The main structural feature that was considered for catalyst geometry was the rotamer about the naphthyl-pyrrolidine bond:

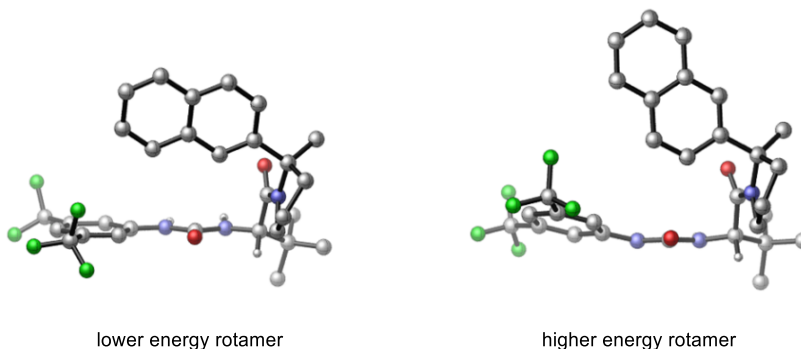

In general, structures where one or both of the catalysts were in the rotamer depicted on the left were lower in energy (compare **TS-S-1**, **TS-S-2**, **TS-S-3**, **TS-S-4**, and **TS-S-5**). The urea conformations examined are consistent with those previously reported.<sup>23</sup> The main structural feature that was considered for the substrate was whether the nucleophilic olefin was positioned “endo” or “exo” to the forming ring:

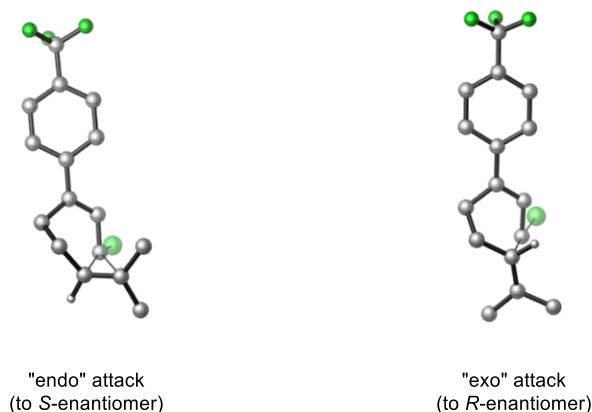

This was a critical factor as alternating between endo and exo attack for otherwise-identically positioned substrates inverts the forming stereocenter (see above). In our computational model endo attack was found to be strongly preferred (the lowest 8 major transition states and the lowest 4 minor transition states all have an endo orientation of the nucleophile), particularly for transition states leading to the major enantiomer of product where it positioned the methyls of the incoming nucleophile in proximity to a naphthyl on one of the catalysts (see below). Moreover, this orientation is consistent with the observed stereochemical outcome of stereospecific reactions of linalool derivatives<sup>24</sup> and a prior proposal for the displacement of neryl leaving groups.<sup>25</sup> On the basis of kinetic evidence indicating the presence of two molecules of catalyst in the transition state only dimeric structures were modeled. On the basis of prior studies from our it was assumed that the catalyst would bind chloride via a 4-H cooperative mechanism.<sup>23</sup> Four classes of 4-H structures were considered – “tail-to-head” distorted square planar dimers, “head-to-head” distorted square planar dimers, “tetrahedral” dimers, and “T-shaped” dimers:

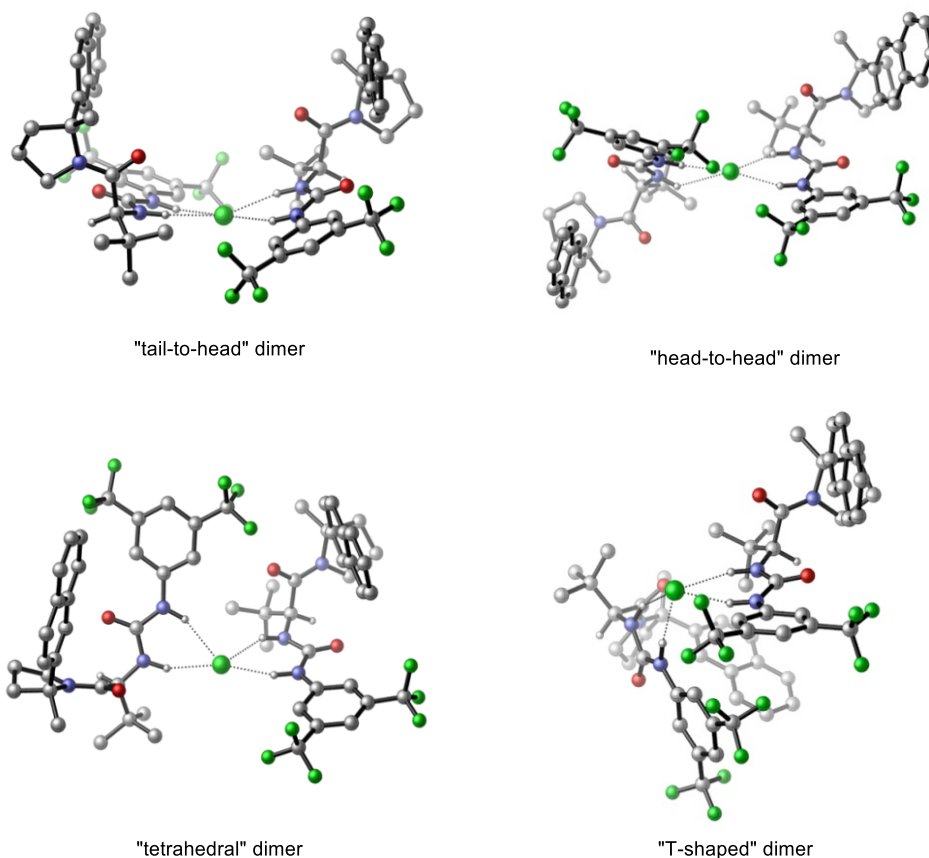

The “tail-to-head” distorted square planar dimers were found to be by far the lowest in energy (the 7 lowest major transition states and the 9 lowest minor transition states are all tail-to-head dimers), consistent with previous studies from our lab.<sup>23</sup> Consequently, the majority of the computational effort was focused on tail-to-head dimers. Efforts were made to vary the positioning of the substrate within the catalyst dimer, though due to the confined steric environment, not much variation was possible.

| Entry | Model chemistry of single point calculation                   | TS-S-1<br>(Hartree) | TS-R-1<br>(Hartree) | $\Delta\Delta G_{\text{rel}}^{\ddagger}$<br>(kcal/mol) |
|-------|---------------------------------------------------------------|---------------------|---------------------|--------------------------------------------------------|
| 1     | PCM(CyH)-B3LYP-D3(BJ)/6-311+G(d,p)                            | -5532.3442580       | -5532.3401350       | 2.59                                                   |
| 2     | PCM(CyH)-B3LYP-D3(BJ)/6-311+G(d,p)<br>(Truhlar-quasi-RRHO)    | -5532.3367310       | -5532.3324200       | 2.71                                                   |
| 3     | PCM(CyH)-B3LYP-D3(BJ)/6-311+G(d,p)<br>(Gaussian default RRHO) | -5532.3382100       | -5532.3344170       | 2.38                                                   |
| 4     | PCM(CyH)-B3LYP-D3(BJ)/6-311+G(d,p)<br>(electronic energy)     | -5533.6453190       | -5533.6397050       | 3.52                                                   |
| 5     | SMD(CyH)-B3LYP-D3(BJ)/6-311+G(d,p)                            | -5532.3872320       | -5532.3843430       | 1.81                                                   |
| 6     | B3LYP-D3(BJ)/6-311+G(d,p)                                     | -5532.3346990       | -5532.3303950       | 2.70                                                   |
| 7     | PCM(CyH)-B3LYP/6-311+G(d,p)                                   | -5531.8467870       | -5531.8465940       | 0.12                                                   |
| 8     | B3LYP/6-31G(d)                                                | -5530.3764570       | -5530.3744940       | 1.23                                                   |
| 9     | PCM(CyH)-B3LYP-D3BJ/def2-TZVPP                                | -5532.9488020       | -5532.9445510       | 2.67                                                   |
| 10    | PCM(CyH)-B97-D3/6-311+G(d,p)                                  | -5528.9714570       | -5528.9672730       | 2.63                                                   |
| 11    | PCM(CyH)-M062X/6-311+G(d,p)                                   | -5529.9487430       | -5529.9376390       | 6.97                                                   |
| 12    | PCM(CyH)- $\omega$ B97-xD/6-311+G(d,p)                        | -5530.3691160       | -5530.3616590       | 4.68                                                   |

**Table S2.** Comparison of TS-S-1 and TS-R-1 with different model chemistries and thermal corrections. Entry 1 shows the free energies of TS-S-1 and TS-R-1 computed using the standard model chemistry for the single point electronic energy and free energy correction (B3LYP-D3(BJ)/6-311+G(d,p) using Grimme’s quasi-RRHO free energy correction). In entries 2-4 the free energy correction is varied and the standard model chemistry is used for the single-point electronic energy calculation. In entries 5-12 the model chemistry used to compute the electronic energy is varied and the standard free energy correction (Grimme’s quasi-RRHO model) is applied. In entries 5-6 the solvent model is varied. In entry 7 the dispersion correction is removed. Entry 8 shows the energetic gap at the level of theory used for geometry optimization. Entry 9 shows an alternate basis set. Entries 10-12 show alternate

functionals. With the exception of entry 7 (no dispersion correction) which predicts a poorly-selective reaction, these were found to consistently predict the correct sense of enantioinduction, supporting the validity of the model.

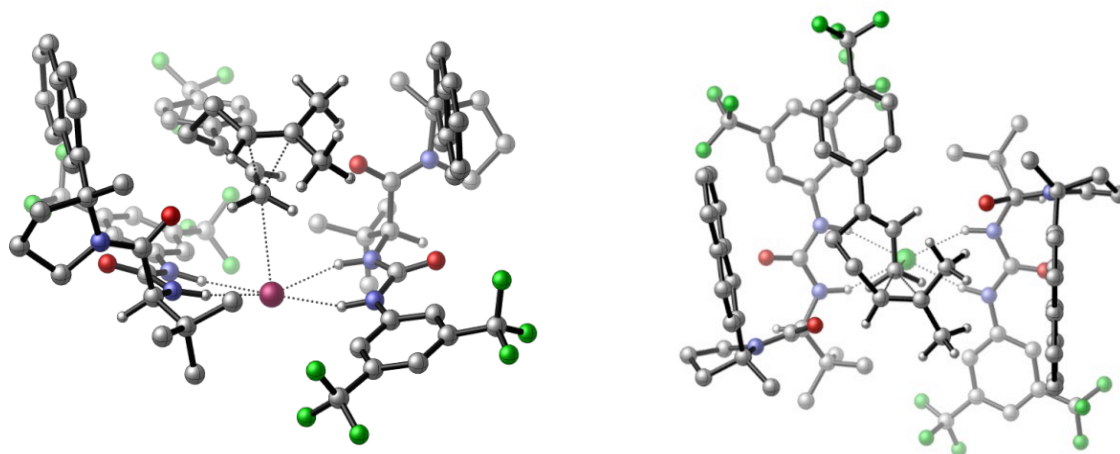

**Figure S25.** Two perspectives of TS-S-1. The lowest energy transition structure leading to the major enantiomer of **2d** with catalyst **7b** is depicted from the rear and from the top. The computed transition structure shows a highly asynchronous  $S_N2$ -type mechanism with extremely advanced bond-breaking. The two methyl substituents of the nucleophilic olefin are aligned over the rings of the naphthyl substituent of the catalyst on the right, suggesting a possible stabilizing interaction. Notably, this interaction is significantly attenuated in **TS-R-1** (see Figure S26 and S27), consistent with the experimental data in Figure 5 indicating preferential stabilization of the major pathway by the aryl substituent on catalyst pyrrolidine. The amides on both catalysts are also positioned in close proximity to the forming C-C bond, suggesting the possibility of stabilizing interactions with developing positive charge in the transition state or with acidified C-H bonds, but in the absence of a more detailed computational model or experimental support this remains speculative. The model also suggests a pi-stacking interaction between the aryl substituent on the substrate and the 3,5-bis(trifluoromethyl)aniline of the catalyst on the left, which also appears to be present in the minor pathway.

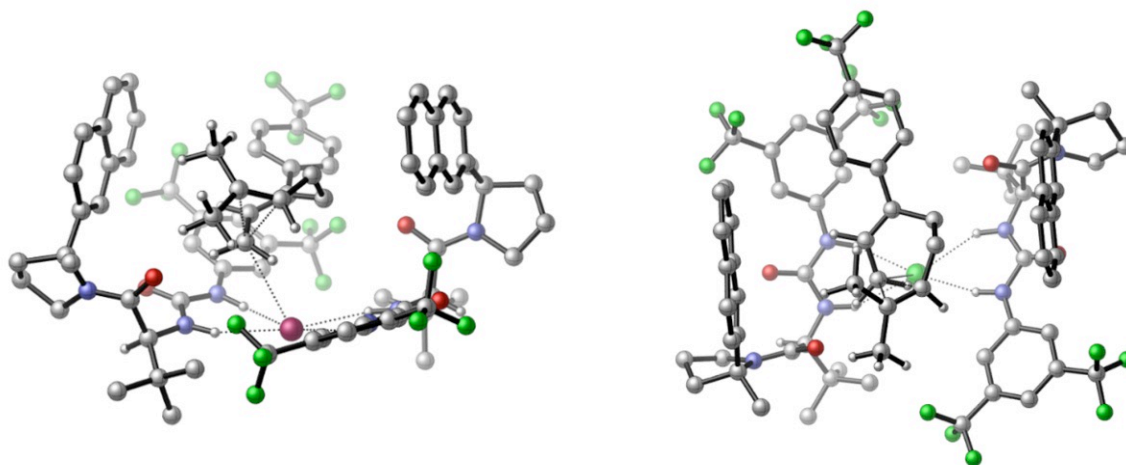

**Figure S26.** Two perspectives of TS-R-1. The lowest energy transition structure leading to the minor enantiomer of **2d** with catalyst **7b** is depicted from the rear and from the top. The computed transition structure shows a high degree of C-Cl bond breaking, including significant geometric reorganization away from the expected linear trajectory for an  $S_N2$  reaction, but no earlier transition state was located along the reaction coordinate corresponding to C-Cl ionization. In comparison to the lowest energy major transition structure (see Figure S25 and S27) the alignment between the methyl substituents of the nucleophilic olefin and the naphthyl group of the catalyst on the left is relatively poor. This is consistent with the experimental data in Figure 5, which indicates stabilization of the minor transition state by the aryl substituent of the catalyst pyrrolidine, but to a lesser extent than in the major pathway. As with TS-S-1, the amide of the catalyst on the left is placed in close proximity to the forming C-C bond, and therefore, near developing positive charge and acidified C-H bonds, suggesting a potential role for the amide in transition state stabilization. Similarly, the model also suggests a pi-stacking interaction between the aryl substituent on the substrate and the 3,5-bis(trifluoromethyl)aniline of the catalyst on the left, which also appears to be present in the major pathway.

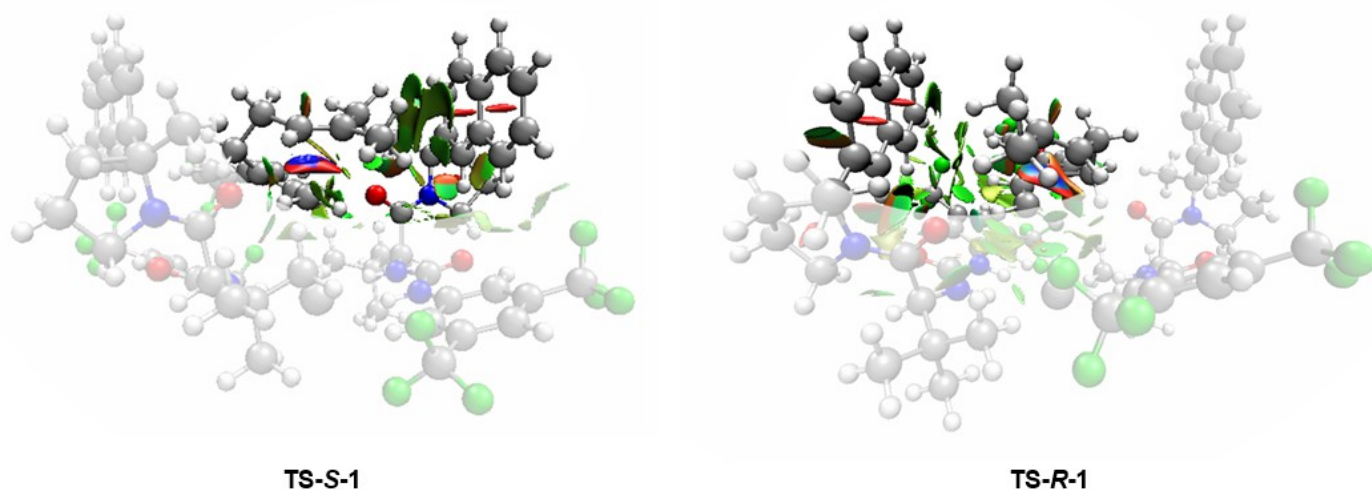

**Figure S27.** Comparison of NCI plots of the main aryl interaction for TS-S-1 and TS-R-1. Stabilizing noncovalent interactions are visualized in green. In **TS-S-1** a relatively large region of stabilizing interactions is visible between the methyl groups of the nucleophilic olefin and the 2-naphthyl group of the catalyst on the right. In comparison, **TS-R-1** shows sparser interactions between the nucleophile and the 2-naphthyl group of the catalyst on the left, suggesting weaker stabilization of the minor transition state through this interaction. This analysis is consistent both with the visual analysis of the computed transition structures (see Figures S25 and S26) as well as the experimental data presented in Figure 5.

## Cartesian coordinates for transition structures

### TS-S-1:

Imaginary frequency:  $-67.85\text{ cm}^{-1}$   
 E[B3LYP/6-31G(d)]:  $-5531.677518\text{ Hartree}$   
 E[PCM(CyH)-B3LYP-D3(BJ)/6-311+G(d,p)]:  $-5533.645319\text{ Hartree}$   
 Free energy correction:  $1.307109\text{ Hartree}$   
 Free energy correction – Grimme quasi-RRHO:  $1.301061\text{ Hartree}$   
 Free energy correction – Truhlar quasi-RRHO:  $1.308588\text{ Hartree}$

|   |             |            |             |
|---|-------------|------------|-------------|
| O | 1.20073900  | 3.55519500 | 0.87749000  |
| C | 1.71252100  | 4.34134800 | 0.06606700  |
| C | 1.32858000  | 4.25642100 | -1.43411200 |
| H | 2.04605400  | 4.82964500 | -2.02526900 |
| N | 1.40747500  | 2.87705000 | -1.87855100 |
| C | 2.61430400  | 2.24181300 | -1.94353800 |
| N | 2.51455300  | 0.93501000 | -2.40490400 |
| H | 1.56693200  | 0.60845300 | -2.61055800 |
| C | -0.08882200 | 4.86671200 | -1.73180300 |
| H | 0.55724600  | 2.33869200 | -2.03394700 |
| C | -0.08421800 | 6.36340400 | -1.36034000 |
| H | -1.05873700 | 6.80470200 | -1.59608700 |
| H | 0.10112200  | 6.52460200 | -0.29270300 |
| H | 0.67314500  | 6.91710100 | -1.92841200 |
| C | -0.36870200 | 4.74542900 | -3.24570500 |
| H | -0.41002000 | 3.70341300 | -3.57616900 |
| H | -1.33558200 | 5.20396700 | -3.48053300 |
| H | 0.40289800  | 5.25637200 | -3.83479400 |
| C | -1.21690400 | 4.16533500 | -0.94845100 |
| H | -1.05976600 | 4.23844800 | 0.13103800  |
| H | -2.17449600 | 4.63805800 | -1.18822200 |



|   |             |             |             |
|---|-------------|-------------|-------------|
| H | -1.30030900 | 3.10449700  | -1.20944400 |
| N | 2.58050300  | 5.31280100  | 0.45413700  |
| C | 3.42902500  | 6.10621600  | -0.46772400 |
| C | 2.88729600  | 5.58663100  | 1.89199100  |
| C | 4.46038800  | 6.76917400  | 0.45352500  |
| H | 3.88950000  | 5.45120400  | -1.21131600 |
| C | 3.70378000  | 6.90602200  | 1.77552800  |
| H | 5.33205700  | 6.11917000  | 0.57839400  |
| H | 4.35589600  | 7.05177600  | 2.64089900  |
| H | 3.00835000  | 7.75408100  | 1.72812100  |
| H | 4.80784600  | 7.72721500  | 0.05620100  |
| H | 2.82787200  | 6.86344300  | -0.98497400 |
| C | 3.51503000  | -0.03233700 | -2.47055700 |
| C | 4.86206000  | 0.21020800  | -2.14414700 |
| C | 3.14026400  | -1.32301800 | -2.88291400 |
| C | 5.78124700  | -0.83551500 | -2.19670100 |
| H | 5.16163200  | 1.20781700  | -1.86061800 |
| C | 4.08153200  | -2.34863600 | -2.94156500 |
| H | 2.10789500  | -1.51797100 | -3.15676100 |
| C | 5.41192300  | -2.12268400 | -2.59244700 |
| H | 6.13653800  | -2.92741600 | -2.62651800 |
| O | -1.84589700 | -3.04140400 | 0.57827900  |
| C | -2.71324000 | -3.67780000 | -0.03608000 |
| C | -2.83114300 | -3.52833600 | -1.57584500 |
| H | -3.77657300 | -3.95509100 | -1.90977200 |
| N | -2.88547100 | -2.11722900 | -1.91936200 |
| C | -4.03896700 | -1.40978900 | -1.72192700 |
| N | -3.92326100 | -0.07445200 | -2.08207700 |
| H | -2.99764500 | 0.22583500  | -2.39940600 |
| C | -1.70409100 | -4.27000900 | -2.37496100 |
| H | -2.02063400 | -1.60346300 | -2.07442800 |
| C | -1.74754300 | -5.77202200 | -2.02891300 |
| H | -0.98012300 | -6.30739800 | -2.59893000 |
| H | -1.55567100 | -5.95538400 | -0.96563300 |
| H | -2.71690600 | -6.21716900 | -2.28440400 |
| C | -1.99541200 | -4.10344900 | -3.88122700 |
| H | -1.94578300 | -3.05533500 | -4.18991400 |
| H | -1.25824500 | -4.66338800 | -4.46820400 |
| H | -2.99123700 | -4.48464100 | -4.13942400 |
| C | -0.29478200 | -3.73006500 | -2.06883400 |
| H | -0.02835300 | -3.87690500 | -1.01963300 |
| H | 0.44413000  | -4.25479900 | -2.68310000 |
| H | -0.20220900 | -2.66138600 | -2.29415000 |
| N | -3.59005900 | -4.51157000 | 0.59074300  |
| C | -4.77260400 | -5.13758300 | -0.05395100 |
| C | -3.55151700 | -4.76388100 | 2.06313200  |
| C | -5.59524400 | -5.68704800 | 1.11807800  |
| H | -5.32341000 | -4.39589500 | -0.63696700 |
| C | -4.53691400 | -5.95981300 | 2.18711200  |
| H | -6.30607200 | -4.93253700 | 1.46948400  |
| H | -4.94554000 | -6.04173000 | 3.19802800  |
| H | -3.99915400 | -6.88998100 | 1.96212600  |
| H | -6.16236400 | -6.57900400 | 0.83654400  |
| H | -4.45448600 | -5.94896600 | -0.71938900 |
| C | -4.89455900 | 0.92066300  | -2.00871400 |
| C | -6.20941200 | 0.70778400  | -1.56486600 |
| C | -4.51829300 | 2.21540300  | -2.41670600 |
| C | -7.10054500 | 1.78133300  | -1.50445200 |
| H | -6.51841000 | -0.28997400 | -1.28650300 |
| C | -5.42875900 | 3.26480500  | -2.36193300 |
| H | -3.51134500 | 2.38663300  | -2.78389100 |

|    |             |             |             |
|----|-------------|-------------|-------------|
| C  | -6.73167200 | 3.06506100  | -1.89706000 |
| H  | -7.43918100 | 3.88345000  | -1.85866600 |
| C  | 1.60057800  | 5.83621400  | 2.70104500  |
| H  | 1.05888800  | 4.91098600  | 2.89585300  |
| H  | 1.83793600  | 6.31893900  | 3.65429200  |
| H  | 0.94612500  | 6.51570200  | 2.14539200  |
| C  | -2.14829600 | -5.18884600 | 2.53521000  |
| H  | -1.45892100 | -4.34607700 | 2.56589000  |
| H  | -2.20546100 | -5.64332200 | 3.52963500  |
| H  | -1.74791300 | -5.94505900 | 1.85170300  |
| O  | -5.07736100 | -1.92266200 | -1.28565300 |
| O  | 3.67695300  | 2.79329500  | -1.62999700 |
| C  | 3.77341000  | 4.49132300  | 2.51100300  |
| C  | 4.49021700  | 3.60141200  | 1.73490300  |
| C  | 3.94354400  | 4.44184700  | 3.92580500  |
| C  | 5.38849000  | 2.66185200  | 2.31190800  |
| H  | 4.36618600  | 3.58597000  | 0.65594900  |
| C  | 4.79210500  | 3.53369900  | 4.51601700  |
| H  | 3.39849500  | 5.13507200  | 4.55891000  |
| C  | 6.14672300  | 1.76289600  | 1.51234900  |
| C  | 5.54493800  | 2.61861000  | 3.73382600  |
| H  | 4.90223700  | 3.51580100  | 5.59814100  |
| C  | 7.01330400  | 0.86121900  | 2.09168000  |
| H  | 6.04221300  | 1.80758700  | 0.43229400  |
| C  | 6.44261700  | 1.67532000  | 4.30237600  |
| C  | 7.15991800  | 0.81538300  | 3.50076500  |
| H  | 7.58579500  | 0.18582400  | 1.46345800  |
| H  | 6.55770200  | 1.64715600  | 5.38368500  |
| H  | 7.84640300  | 0.10025400  | 3.94595000  |
| C  | -4.10214000 | -3.56412500 | 2.85627500  |
| C  | -4.78819700 | -2.53148300 | 2.24735700  |
| C  | -3.97939900 | -3.54658800 | 4.27662600  |
| C  | -5.36119400 | -1.46767000 | 2.99745300  |
| H  | -4.90267800 | -2.50453300 | 1.16780300  |
| C  | -4.51368700 | -2.52756000 | 5.03137300  |
| H  | -3.45726300 | -4.35396100 | 4.78144500  |
| C  | -6.08331400 | -0.41558100 | 2.36989000  |
| C  | -5.21817600 | -1.45494800 | 4.42159000  |
| H  | -4.40680400 | -2.53886900 | 6.11406000  |
| C  | -6.62924900 | 0.60638100  | 3.11487200  |
| H  | -6.20459500 | -0.43495500 | 1.29048200  |
| C  | -5.78650000 | -0.38367700 | 5.16221400  |
| C  | -6.47502200 | 0.62480400  | 4.52359500  |
| H  | -7.18783800 | 1.39383300  | 2.61836800  |
| H  | -5.67666800 | -0.37745500 | 6.24455400  |
| H  | -6.91193000 | 1.43538400  | 5.10091000  |
| Cl | -0.73365800 | 0.42113000  | -2.52491100 |
| C  | -8.47790500 | 1.51945000  | -0.95676600 |
| C  | -4.99054700 | 4.65038300  | -2.75334200 |
| C  | 7.20527000  | -0.60434500 | -1.77137100 |
| C  | 3.63278500  | -3.73445600 | -3.32546400 |
| F  | 8.09012200  | -1.04776200 | -2.68721300 |
| F  | 7.47840800  | 0.69645800  | -1.53499100 |
| F  | 7.48841300  | -1.27506700 | -0.61419700 |
| F  | 4.64654900  | -4.48332000 | -3.80384200 |
| F  | 2.66455700  | -3.70622100 | -4.27071300 |
| F  | 3.11211700  | -4.40482400 | -2.26600000 |
| F  | -8.43768500 | 1.27827600  | 0.38198900  |
| F  | -9.04831700 | 0.43432200  | -1.52131200 |
| F  | -9.31435500 | 2.56210300  | -1.14134300 |
| F  | -3.98961200 | 4.63408300  | -3.66263000 |

|   |             |             |             |
|---|-------------|-------------|-------------|
| F | -6.00326200 | 5.37314700  | -3.27589300 |
| F | -4.52860100 | 5.35029200  | -1.68263200 |
| C | -0.26973500 | 0.53546300  | 0.70179200  |
| H | -1.30538900 | 0.46230200  | 0.39093200  |
| H | 0.18212800  | 1.51351500  | 0.55805100  |
| C | 0.51775900  | -0.64144900 | 0.71437000  |
| H | 0.05811500  | -1.54366600 | 0.32337900  |
| C | 1.77687100  | -0.65469800 | 1.26129000  |
| C | 2.23836400  | 0.55214400  | 2.02254100  |
| H | 3.24091500  | 0.41349800  | 2.42822700  |
| H | 2.25247900  | 1.45449800  | 1.40251400  |
| C | 1.26890200  | 0.83361400  | 3.23355300  |
| H | 1.73957700  | 1.62782800  | 3.82398700  |
| H | 1.21963100  | -0.05860100 | 3.86351000  |
| C | -0.09194400 | 1.31255300  | 2.82743700  |
| H | -0.13122000 | 2.36049400  | 2.54008600  |
| C | -1.29348500 | 0.64578400  | 2.93532100  |
| C | -2.58510100 | 1.37544000  | 2.68119500  |
| H | -2.42607200 | 2.35681300  | 2.22565400  |
| H | -3.11423700 | 1.51758000  | 3.63323200  |
| H | -3.26060000 | 0.78776700  | 2.05003300  |
| C | -1.42958600 | -0.78191100 | 3.37411500  |
| H | -0.48583100 | -1.22994500 | 3.68834800  |
| H | -1.84567600 | -1.39657800 | 2.56538500  |
| H | -2.14225400 | -0.84553100 | 4.20511500  |
| C | 2.61460500  | -1.86533700 | 1.19804600  |
| C | 4.01676300  | -1.74549100 | 1.13192600  |
| C | 2.04832000  | -3.15320800 | 1.11440300  |
| C | 4.81845400  | -2.86183000 | 0.92550700  |
| H | 4.48696300  | -0.76952600 | 1.18448300  |
| C | 2.85197200  | -4.27179300 | 0.92447000  |
| H | 0.97391300  | -3.27957700 | 1.20286900  |
| C | 4.23644100  | -4.12626700 | 0.80993900  |
| H | 5.89147200  | -2.74231200 | 0.82337000  |
| H | 2.40480100  | -5.25692000 | 0.85262600  |
| C | 5.11336000  | -5.30409500 | 0.48256400  |
| F | 4.49176800  | -6.48242400 | 0.69706500  |
| F | 6.24711900  | -5.30106600 | 1.22008300  |
| F | 5.49633500  | -5.28346000 | -0.81701100 |

#### TS-S-2:

Imaginary frequency: -105.50 cm<sup>-1</sup>

E[B3LYP/6-31G(d)]: -5531.676193 Hartree

E[PCM(CyH)-B3LYP-D3(BJ)/6-311+G(d,p)]: -5533.642879 Hartree

Free energy correction: 1.304258 Hartree

Free energy correction – Grimme quasi-RRHO: 1.299786 Hartree

Free energy correction – Truhlar quasi-RRHO: 1.308639 Hartree

|   |            |            |             |
|---|------------|------------|-------------|
| O | 1.31623800 | 3.40228800 | 1.22177000  |
| C | 1.83357100 | 4.29969700 | 0.53897000  |
| C | 1.41944500 | 4.46907100 | -0.94609900 |
| H | 2.13098400 | 5.12619200 | -1.44935300 |
| N | 1.48349400 | 3.18113100 | -1.61328300 |
| C | 2.69083500 | 2.56755300 | -1.79263100 |
| N | 2.58316300 | 1.31016800 | -2.36882400 |
| H | 1.63112900 | 0.96746200 | -2.52267000 |
| C | 0.00478200 | 5.12830400 | -1.11553200 |
| H | 0.63254200 | 2.64499300 | -1.77070900 |
| C | 0.02672700 | 6.53645600 | -0.48750400 |

|   |             |             |             |
|---|-------------|-------------|-------------|
| H | -0.94353000 | 7.02291700  | -0.63609000 |
| H | 0.21845100  | 6.50499100  | 0.59083200  |
| H | 0.78867300  | 7.17324500  | -0.95323700 |
| C | -0.28807600 | 5.27202900  | -2.62458900 |
| H | -0.32424100 | 4.30218100  | -3.12932500 |
| H | -1.25856900 | 5.75822600  | -2.77098600 |
| H | 0.47729400  | 5.88125100  | -3.12102400 |
| C | -1.12158600 | 4.30815700  | -0.45451600 |
| H | -0.95619500 | 4.19771500  | 0.62062600  |
| H | -2.07877400 | 4.81721100  | -0.60510600 |
| H | -1.21199800 | 3.30623900  | -0.88911800 |
| N | 2.74255600  | 5.16622000  | 1.05797100  |
| C | 3.59197600  | 6.08165200  | 0.25754700  |
| C | 3.10463900  | 5.17328400  | 2.50898000  |
| C | 4.68394100  | 6.52604700  | 1.23787400  |
| H | 3.99634900  | 5.55476400  | -0.60963400 |
| C | 3.97890200  | 6.45739700  | 2.59318300  |
| H | 5.52589400  | 5.82714900  | 1.20978700  |
| H | 4.66535100  | 6.42006800  | 3.44333400  |
| H | 3.32418000  | 7.32879300  | 2.72410700  |
| H | 5.06512400  | 7.52372100  | 1.00165600  |
| H | 3.00603400  | 6.94208600  | -0.08799000 |
| C | 3.60625600  | 0.38680300  | -2.57670600 |
| C | 4.97153200  | 0.71883800  | -2.56947900 |
| C | 3.23473600  | -0.94526700 | -2.82812800 |
| C | 5.92493200  | -0.27791400 | -2.78050100 |
| H | 5.26624500  | 1.74506500  | -2.40081900 |
| C | 4.20395800  | -1.92133900 | -3.04292100 |
| H | 2.18150100  | -1.20969500 | -2.84977000 |
| C | 5.56216700  | -1.60365100 | -3.01576600 |
| H | 6.31270500  | -2.36464400 | -3.18363700 |
| O | -1.91392100 | -3.04788100 | 0.25378900  |
| C | -2.77927200 | -3.58466900 | -0.45262800 |
| C | -2.84034100 | -3.26640700 | -1.96964200 |
| H | -3.78057400 | -3.63567100 | -2.37828200 |
| N | -2.85956500 | -1.82507200 | -2.15917500 |
| C | -4.00735800 | -1.12071600 | -1.92166100 |
| N | -3.86164600 | 0.24328200  | -2.13196300 |
| H | -2.92271300 | 0.56044500  | -2.38843100 |
| C | -1.70038500 | -3.94225000 | -2.80804100 |
| H | -1.98286000 | -1.31480600 | -2.24216800 |
| C | -1.77605600 | -5.47035500 | -2.61622400 |
| H | -1.00374800 | -5.95983100 | -3.21983900 |
| H | -1.61227200 | -5.76265000 | -1.57280900 |
| H | -2.74608400 | -5.87000800 | -2.93644900 |
| C | -1.94733300 | -3.61957600 | -4.29685000 |
| H | -1.87508100 | -2.54650000 | -4.49598100 |
| H | -1.20153000 | -4.12879100 | -4.91803200 |
| H | -2.94046200 | -3.95669000 | -4.61888100 |
| C | -0.29177300 | -3.46068300 | -2.41252600 |
| H | -0.05116700 | -3.72419500 | -1.38010200 |
| H | 0.45510300  | -3.92681900 | -3.06358400 |
| H | -0.17992400 | -2.37557500 | -2.52094300 |
| N | -3.70063100 | -4.44936100 | 0.05538900  |
| C | -4.87787000 | -4.96874300 | -0.68633800 |
| C | -3.71663000 | -4.85341900 | 1.49443700  |
| C | -5.76105100 | -5.59507500 | 0.39965900  |
| H | -5.38148900 | -4.15576700 | -1.21392900 |
| C | -4.75165700 | -6.01324200 | 1.46892900  |
| H | -6.45477100 | -4.84953400 | 0.80090000  |
| H | -5.19760800 | -6.17563900 | 2.45401600  |

|    |             |             |             |
|----|-------------|-------------|-------------|
| H  | -4.24274900 | -6.93894700 | 1.17039400  |
| H  | -6.35118700 | -6.43164600 | 0.01452500  |
| H  | -4.56157700 | -5.72530200 | -1.41457300 |
| C  | -4.82031600 | 1.24110200  | -1.97226800 |
| C  | -6.15097400 | 1.00137100  | -1.59311700 |
| C  | -4.41414800 | 2.56748700  | -2.21724000 |
| C  | -7.02845800 | 2.07578500  | -1.43352800 |
| H  | -6.48210700 | -0.01617300 | -1.44072900 |
| C  | -5.31163700 | 3.61912300  | -2.06684400 |
| H  | -3.39447500 | 2.76268400  | -2.53407200 |
| C  | -6.63021000 | 3.38962500  | -1.66469000 |
| H  | -7.32713600 | 4.21025200  | -1.55196600 |
| C  | 1.85384400  | 5.33093300  | 3.39423800  |
| H  | 1.27243200  | 4.41035300  | 3.43952100  |
| H  | 2.13913600  | 5.62355100  | 4.40961700  |
| H  | 1.21970000  | 6.12711000  | 2.99064300  |
| C  | -2.34667200 | -5.38639000 | 1.95545400  |
| H  | -1.62889100 | -4.58171200 | 2.10993000  |
| H  | -2.45524600 | -5.95316900 | 2.88590800  |
| H  | -1.94983400 | -6.07174800 | 1.19910000  |
| O  | -5.06615400 | -1.65873100 | -1.57323800 |
| O  | 3.76294000  | 3.09709800  | -1.47289700 |
| C  | 3.95234300  | 3.94848400  | 2.89650600  |
| C  | 4.58329300  | 3.16198600  | 1.95249000  |
| C  | 4.17226000  | 3.65595700  | 4.27470200  |
| C  | 5.43633900  | 2.08644300  | 2.32481000  |
| H  | 4.42591400  | 3.33735800  | 0.89225200  |
| C  | 4.98323700  | 2.61628300  | 4.66792300  |
| H  | 3.69767800  | 4.26544700  | 5.03763100  |
| C  | 6.09678300  | 1.28571900  | 1.35287300  |
| C  | 5.64328600  | 1.79974500  | 3.71182200  |
| H  | 5.13438500  | 2.41447100  | 5.72618100  |
| C  | 6.92347900  | 0.25158000  | 1.73652400  |
| H  | 5.94693400  | 1.50753200  | 0.30028000  |
| C  | 6.49546200  | 0.72270500  | 4.07582700  |
| C  | 7.12225000  | -0.03426500 | 3.11078000  |
| H  | 7.43270000  | -0.33636700 | 0.97909800  |
| H  | 6.64994500  | 0.50952600  | 5.13126100  |
| H  | 7.77822700  | -0.85091800 | 3.40041500  |
| C  | -4.24010500 | -3.71823200 | 2.39374900  |
| C  | -4.88549700 | -2.61033000 | 1.87975800  |
| C  | -4.13421100 | -3.83970200 | 3.81032600  |
| C  | -5.43284500 | -1.60407900 | 2.72263700  |
| H  | -4.98438100 | -2.47629700 | 0.80661000  |
| C  | -4.64438300 | -2.87962500 | 4.65388500  |
| H  | -3.64408200 | -4.70778700 | 4.24079300  |
| C  | -6.11298900 | -0.47354700 | 2.19198600  |
| C  | -5.30633300 | -1.73107200 | 4.14280900  |
| H  | -4.55059200 | -2.99711100 | 5.73144400  |
| C  | -6.63376200 | 0.49108800  | 3.02608400  |
| H  | -6.22353500 | -0.38686400 | 1.11479300  |
| C  | -5.84749700 | -0.71597000 | 4.97707600  |
| C  | -6.49501100 | 0.37115600  | 4.43144700  |
| H  | -7.16166900 | 1.33959800  | 2.60185100  |
| H  | -5.75012000 | -0.81606300 | 6.05598500  |
| H  | -6.91187200 | 1.13765900  | 5.07945200  |
| Cl | -0.65352100 | 0.73374900  | -2.43458400 |
| C  | -8.42344300 | 1.77894600  | -0.95225200 |
| C  | -4.84390200 | 5.03329200  | -2.28240300 |
| C  | 7.37801000  | 0.10669500  | -2.70835500 |
| C  | 3.75262900  | -3.34103100 | -3.26034500 |

|   |             |             |             |
|---|-------------|-------------|-------------|
| F | 7.63469900  | 1.24406000  | -3.38775900 |
| F | 7.76792600  | 0.33384500  | -1.42294100 |
| F | 8.19085300  | -0.85294400 | -3.19671000 |
| F | 4.76687800  | -4.15589200 | -3.61563800 |
| F | 2.80871700  | -3.42364900 | -4.22877300 |
| F | 3.19442800  | -3.86154100 | -2.13927300 |
| F | -8.42558600 | 1.42733600  | 0.36257600  |
| F | -8.98162900 | 0.74914800  | -1.62235400 |
| F | -9.24828000 | 2.83991500  | -1.07405100 |
| F | -3.82160500 | 5.10641500  | -3.16431100 |
| F | -5.83296100 | 5.82977700  | -2.73871400 |
| F | -4.39842700 | 5.59469700  | -1.12626700 |
| C | -0.19319300 | 0.45316800  | 0.73490300  |
| H | -1.21615300 | 0.49078900  | 0.37999100  |
| H | 0.33590600  | 1.39972500  | 0.65083900  |
| C | 0.50010300  | -0.78952800 | 0.65443700  |
| H | -0.02146100 | -1.61154700 | 0.17493600  |
| C | 1.71916100  | -0.96123900 | 1.25125100  |
| C | 2.25144900  | 0.15405600  | 2.10505500  |
| H | 3.21850000  | -0.09527000 | 2.54294000  |
| H | 2.37375200  | 1.08502000  | 1.54222900  |
| C | 1.25173800  | 0.44458800  | 3.28449300  |
| H | 1.73705600  | 1.18187300  | 3.93356000  |
| H | 1.11925800  | -0.47047200 | 3.86839700  |
| C | -0.06331000 | 1.02206100  | 2.84359600  |
| H | -0.04208100 | 2.09187200  | 2.65262000  |
| C | -1.30506100 | 0.41569100  | 2.87722000  |
| C | -2.54786300 | 1.23099000  | 2.64751400  |
| H | -2.32667700 | 2.22944400  | 2.26069400  |
| H | -3.08466100 | 1.33968800  | 3.59984400  |
| H | -3.24228700 | 0.72234800  | 1.96999300  |
| C | -1.52647100 | -1.03096900 | 3.19783800  |
| H | -0.62078600 | -1.54783300 | 3.51737400  |
| H | -1.93181400 | -1.56151600 | 2.32599600  |
| H | -2.28179500 | -1.12020600 | 3.98765900  |
| C | 2.41911800  | -2.26005900 | 1.20405500  |
| C | 3.82499000  | -2.31679800 | 1.25538000  |
| C | 1.70497900  | -3.46971800 | 1.08526300  |
| C | 4.49320100  | -3.53435500 | 1.17576200  |
| H | 4.40758200  | -1.40328100 | 1.31969600  |
| C | 2.37326500  | -4.68666400 | 1.01924100  |
| H | 0.61985200  | -3.45846100 | 1.06115600  |
| C | 3.76969600  | -4.72310900 | 1.06197800  |
| H | 5.57758600  | -3.55939100 | 1.19402100  |
| H | 1.81107400  | -5.61032000 | 0.93100900  |
| C | 4.48885800  | -6.04510100 | 1.05173000  |
| F | 3.80700200  | -6.98457600 | 0.36163000  |
| F | 4.65684700  | -6.52596600 | 2.30769700  |
| F | 5.71870100  | -5.94549500 | 0.50311000  |

### TS-S-3:

Imaginary frequency: -90.79 cm<sup>-1</sup>

E[B3LYP/6-31G(d)]: -5531.675994 Hartree

E[PCM(CyH)-B3LYP-D3(BJ)/6-311+G(d,p)]: -5533.643523 Hartree

Free energy correction: 1.306083 Hartree

Free energy correction – Grimme quasi-RRHO: 1.300673 Hartree

Free energy correction – Truhlar quasi-RRHO: 1.308846 Hartree

|   |            |            |            |
|---|------------|------------|------------|
| O | 1.35809400 | 3.48109400 | 0.77991200 |
|---|------------|------------|------------|

|   |             |             |             |
|---|-------------|-------------|-------------|
| C | 1.76752300  | 4.37433500  | 0.02221000  |
| C | 1.20253000  | 4.47451900  | -1.42077800 |
| H | 1.83851600  | 5.13362300  | -2.01472900 |
| N | 1.24630700  | 3.16091400  | -2.04095000 |
| C | 2.45383900  | 2.55195700  | -2.23270600 |
| N | 2.34787500  | 1.25426400  | -2.71699900 |
| H | 1.39611200  | 0.91803800  | -2.88638300 |
| C | -0.24316000 | 5.08196700  | -1.47468700 |
| H | 0.40063300  | 2.59662800  | -2.09961900 |
| C | -0.20803100 | 6.51568600  | -0.90804000 |
| H | -1.20477600 | 6.96503000  | -0.97649700 |
| H | 0.09189300  | 6.53625100  | 0.14569900  |
| H | 0.48060000  | 7.15507800  | -1.47367400 |
| C | -0.68777100 | 5.15171100  | -2.95160300 |
| H | -0.74370100 | 4.16014100  | -3.41032800 |
| H | -1.68233300 | 5.60527400  | -3.02028700 |
| H | 0.00588400  | 5.75884200  | -3.54626700 |
| C | -1.26985300 | 4.25706000  | -0.67237100 |
| H | -0.99653100 | 4.19963100  | 0.38490200  |
| H | -2.25451800 | 4.72911300  | -0.74809000 |
| H | -1.36697800 | 3.23488500  | -1.05517300 |
| N | 2.68686500  | 5.28986200  | 0.42538400  |
| C | 3.41182200  | 6.21547300  | -0.47796000 |
| C | 3.21131400  | 5.32765800  | 1.82820100  |
| C | 4.60046000  | 6.70199800  | 0.36009400  |
| H | 3.72843300  | 5.68775200  | -1.38042800 |
| C | 4.06921700  | 6.62614700  | 1.79222600  |
| H | 5.45561800  | 6.03100000  | 0.23201900  |
| H | 4.85485900  | 6.60468300  | 2.55170800  |
| H | 3.42065200  | 7.48726000  | 1.99901200  |
| H | 4.91778600  | 7.70884100  | 0.07343200  |
| H | 2.76587900  | 7.05457000  | -0.76360600 |
| C | 3.34846100  | 0.28500400  | -2.75678300 |
| C | 4.66225100  | 0.49833200  | -2.30452000 |
| C | 2.99917700  | -0.98734600 | -3.24552000 |
| C | 5.57580100  | -0.55539200 | -2.31651800 |
| H | 4.94537900  | 1.47951800  | -1.95372400 |
| C | 3.93501700  | -2.01735000 | -3.26580500 |
| H | 1.99020100  | -1.16344200 | -3.60469600 |
| C | 5.23534400  | -1.81840100 | -2.79970200 |
| H | 5.95848900  | -2.62476700 | -2.81410900 |
| O | -1.78072200 | -3.05407800 | 0.34674600  |
| C | -2.68066100 | -3.64497600 | -0.26671600 |
| C | -2.87617100 | -3.38539200 | -1.78365100 |
| H | -3.83385400 | -3.79792800 | -2.10035000 |
| N | -2.95785400 | -1.95343800 | -2.02058000 |
| C | -4.10302700 | -1.27494700 | -1.70868500 |
| N | -4.02243700 | 0.08346900  | -1.98156600 |
| H | -3.12211100 | 0.41778000  | -2.33634600 |
| C | -1.78608800 | -4.05748600 | -2.68841200 |
| H | -2.11014700 | -1.42189600 | -2.20721000 |
| C | -1.80695100 | -5.58067800 | -2.44900600 |
| H | -1.06854100 | -6.06898100 | -3.09455100 |
| H | -1.55906900 | -5.83777500 | -1.41293800 |
| H | -2.78707800 | -6.01302400 | -2.68482700 |
| C | -2.15358800 | -3.78593500 | -4.16253900 |
| H | -2.12127300 | -2.71841300 | -4.39865700 |
| H | -1.44603700 | -4.29904500 | -4.82402900 |
| H | -3.16047500 | -4.15315200 | -4.39699100 |
| C | -0.36470200 | -3.53098300 | -2.41544800 |
| H | -0.04122500 | -3.75626400 | -1.39658600 |

|   |             |             |             |
|---|-------------|-------------|-------------|
| H | 0.34218100  | -4.00198200 | -3.10625900 |
| H | -0.28719200 | -2.44773300 | -2.56374500 |
| N | -3.52549200 | -4.52149700 | 0.34420800  |
| C | -4.74124600 | -5.10344800 | -0.27916600 |
| C | -3.40786200 | -4.87613200 | 1.79143100  |
| C | -5.50860800 | -5.72070200 | 0.89636700  |
| H | -5.31507200 | -4.32549300 | -0.78757500 |
| C | -4.39969200 | -6.06948800 | 1.88921900  |
| H | -6.19219900 | -4.98473900 | 1.33128500  |
| H | -4.75619700 | -6.21298200 | 2.91291400  |
| H | -3.88502000 | -6.98766400 | 1.57756500  |
| H | -6.09909300 | -6.58850300 | 0.58860100  |
| H | -4.46048500 | -5.87371900 | -1.00757300 |
| C | -4.99638900 | 1.05713700  | -1.77334000 |
| C | -6.28124100 | 0.79161700  | -1.27262000 |
| C | -4.65693000 | 2.38526700  | -2.09744000 |
| C | -7.17693300 | 1.84422600  | -1.07409400 |
| H | -6.56419400 | -0.22920600 | -1.05783800 |
| C | -5.57240500 | 3.41437300  | -1.90488000 |
| H | -3.67525900 | 2.59899900  | -2.50847500 |
| C | -6.84335900 | 3.16028100  | -1.38238500 |
| H | -7.55459700 | 3.96320800  | -1.23687300 |
| C | 2.06760300  | 5.49047200  | 2.84506500  |
| H | 1.50173600  | 4.56708300  | 2.96639900  |
| H | 2.46443300  | 5.79763300  | 3.81803800  |
| H | 1.38763300  | 6.27861100  | 2.50556500  |
| C | -1.98603000 | -5.34690100 | 2.15169000  |
| H | -1.28699600 | -4.51387000 | 2.21520700  |
| H | -1.99521300 | -5.88103900 | 3.10737800  |
| H | -1.63046500 | -6.04724600 | 1.38857500  |
| O | -5.10836000 | -1.83013500 | -1.24693900 |
| O | 3.52768300  | 3.11996300  | -2.00152300 |
| C | 4.11251200  | 4.11487900  | 2.13222600  |
| C | 4.39295700  | 3.74491600  | 3.43569800  |
| C | 4.75710600  | 3.40666300  | 1.07846100  |
| C | 5.29430700  | 2.68901500  | 3.74239900  |
| H | 3.93138700  | 4.26563000  | 4.27037400  |
| C | 5.64532000  | 2.38855800  | 1.34099300  |
| H | 4.52342700  | 3.64431000  | 0.04714100  |
| C | 5.58164500  | 2.30038800  | 5.07974400  |
| C | 5.94071000  | 1.99275400  | 2.67113600  |
| H | 6.13480500  | 1.87145900  | 0.51996500  |
| C | 6.46032500  | 1.27312900  | 5.34205500  |
| H | 5.09611900  | 2.83101600  | 5.89602400  |
| C | 6.83937700  | 0.93351200  | 2.97283500  |
| C | 7.09362600  | 0.58099700  | 4.27931900  |
| H | 6.67207000  | 0.98779900  | 6.36909700  |
| H | 7.31588200  | 0.40583900  | 2.14990900  |
| H | 7.78252000  | -0.22938900 | 4.50157900  |
| C | -3.89571400 | -3.72901900 | 2.69565500  |
| C | -4.62054700 | -2.66125600 | 2.20304600  |
| C | -3.66976000 | -3.79908600 | 4.10159300  |
| C | -5.13343200 | -1.64632700 | 3.05713300  |
| H | -4.81111300 | -2.56666500 | 1.13808800  |
| C | -4.14344400 | -2.82873900 | 4.95458500  |
| H | -3.11497100 | -4.63525600 | 4.51647800  |
| C | -5.89568300 | -0.55805200 | 2.55035800  |
| C | -4.88644100 | -1.72111700 | 4.46511100  |
| H | -3.95725400 | -2.90643900 | 6.02370800  |
| C | -6.38133100 | 0.41583000  | 3.39481700  |
| H | -6.09678900 | -0.51123700 | 1.48386000  |



|    |             |             |             |
|----|-------------|-------------|-------------|
| C  | -5.39423100 | -0.69754000 | 5.30988700  |
| C  | -6.12370200 | 0.34796500  | 4.78683400  |
| H  | -6.97252000 | 1.23145500  | 2.99000800  |
| H  | -5.20501100 | -0.75786800 | 6.37951200  |
| H  | -6.51376800 | 1.12127400  | 5.44338500  |
| Cl | -0.87854400 | 0.65055000  | -2.62161400 |
| C  | -8.51617800 | 1.52235300  | -0.46703700 |
| C  | -5.17034100 | 4.83276300  | -2.20714800 |
| C  | 6.92694400  | -0.35326300 | -1.68908000 |
| C  | 3.51775200  | -3.39187000 | -3.71704400 |
| F  | 7.32756100  | 0.93528200  | -1.71237700 |
| F  | 6.91123000  | -0.71926600 | -0.36659300 |
| F  | 7.88734400  | -1.09454300 | -2.27367800 |
| F  | 4.53981300  | -4.06986200 | -4.28130100 |
| F  | 2.50987600  | -3.35030500 | -4.61763700 |
| F  | 3.07748300  | -4.14225000 | -2.67570000 |
| F  | -8.39544700 | 1.20445800  | 0.85077600  |
| F  | -9.09945300 | 0.46092600  | -1.06236100 |
| F  | -9.37911600 | 2.55705300  | -0.54180700 |
| F  | -4.24412700 | 4.90441400  | -3.18970200 |
| F  | -6.22265800 | 5.58860600  | -2.58400000 |
| F  | -4.62723300 | 5.44195400  | -1.11883300 |
| C  | -0.14921500 | 0.49079000  | 0.54499400  |
| H  | -1.19702700 | 0.46451500  | 0.27012000  |
| H  | 0.32671000  | 1.45683300  | 0.39500700  |
| C  | 0.59893500  | -0.71582500 | 0.46476400  |
| H  | 0.08848300  | -1.58474800 | 0.06187600  |
| C  | 1.87104800  | -0.79664300 | 0.96588100  |
| C  | 2.40651600  | 0.37356200  | 1.73852800  |
| H  | 3.41638600  | 0.18849900  | 2.10630800  |
| H  | 2.43414000  | 1.29027800  | 1.14093500  |
| C  | 1.48822600  | 0.65361400  | 2.98652100  |
| H  | 1.99166300  | 1.42936000  | 3.57368800  |
| H  | 1.44448600  | -0.24826400 | 3.60302400  |
| C  | 0.11978800  | 1.16139100  | 2.63707700  |
| H  | 0.08103900  | 2.22180200  | 2.40063700  |
| C  | -1.08775900 | 0.50715300  | 2.78370000  |
| C  | -2.37866400 | 1.26147700  | 2.61778200  |
| H  | -2.22959700 | 2.25315600  | 2.18190300  |
| H  | -2.85201600 | 1.38316500  | 3.60158600  |
| H  | -3.09576200 | 0.69999500  | 2.00913700  |
| C  | -1.22255100 | -0.93300200 | 3.17587400  |
| H  | -0.27310900 | -1.40159800 | 3.43786200  |
| H  | -1.67609600 | -1.51365500 | 2.36180300  |
| H  | -1.90524300 | -1.01844800 | 4.02973900  |
| C  | 2.64496200  | -2.04990300 | 0.88596400  |
| C  | 4.04884900  | -2.00934700 | 0.79344000  |
| C  | 2.00888400  | -3.30715100 | 0.85311500  |
| C  | 4.78987000  | -3.17648400 | 0.64592200  |
| H  | 4.56907600  | -1.05859100 | 0.78017400  |
| C  | 2.75113200  | -4.47575100 | 0.72445500  |
| H  | 0.92882800  | -3.37047600 | 0.94146800  |
| C  | 4.14303800  | -4.41382700 | 0.61467000  |
| H  | 5.86714200  | -3.11697000 | 0.53512300  |
| H  | 2.24988200  | -5.43731100 | 0.70071100  |
| C  | 4.95572200  | -5.67644900 | 0.51305500  |
| F  | 4.23793400  | -6.70265100 | 0.00904700  |
| F  | 5.41113900  | -6.07161500 | 1.72629400  |
| F  | 6.04048600  | -5.50926200 | -0.27517200 |

**TS-S-4:**Imaginary frequency: -99.52 cm<sup>-1</sup>

E[B3LYP/6-31G(d)]: -5531.674214 Hartree

E[PCM(CyH)-B3LYP-D3(BJ)/6-311+G(d,p)]: -5533.640237 Hartree

Free energy correction: 1.303830 Hartree

Free energy correction – Grimme quasi-RRHO: 1.299588 Hartree

Free energy correction – Truhlar quasi-RRHO: 1.308711 Hartree

|   |             |             |             |
|---|-------------|-------------|-------------|
| O | 1.32646900  | 3.36822500  | 1.15328500  |
| C | 1.90227500  | 4.25592800  | 0.50532100  |
| C | 1.57271200  | 4.44362000  | -0.99872300 |
| H | 2.32306300  | 5.08990200  | -1.45785700 |
| N | 1.64609400  | 3.15894400  | -1.67140900 |
| C | 2.84677900  | 2.51594600  | -1.77869900 |
| N | 2.74393100  | 1.26216700  | -2.36349400 |
| H | 1.79466000  | 0.94206900  | -2.57361200 |
| C | 0.18247900  | 5.13304400  | -1.23634200 |
| H | 0.79368100  | 2.64354700  | -1.88191900 |
| C | 0.20106200  | 6.53650600  | -0.59775000 |
| H | -0.74895900 | 7.04514400  | -0.79493100 |
| H | 0.33315200  | 6.49397800  | 0.48910300  |
| H | 1.00102500  | 7.15906700  | -1.01664400 |
| C | -0.03103900 | 5.29205000  | -2.75717800 |
| H | -0.05712700 | 4.32643100  | -3.27060900 |
| H | -0.98539400 | 5.79511700  | -2.94781100 |
| H | 0.76761200  | 5.89243800  | -3.20999300 |
| C | -0.99310200 | 4.33273600  | -0.64008800 |
| H | -0.88005300 | 4.20349300  | 0.43961400  |
| H | -1.92846600 | 4.86942200  | -0.82541400 |
| H | -1.08896100 | 3.34006700  | -1.09428400 |
| N | 2.80214200  | 5.09706200  | 1.07869100  |
| C | 3.71792800  | 5.99327000  | 0.33172100  |
| C | 3.08074500  | 5.09098600  | 2.54805400  |
| C | 4.76512400  | 6.40397900  | 1.37361000  |
| H | 4.15536500  | 5.45946200  | -0.51489600 |
| C | 3.98349600  | 6.35043400  | 2.68702000  |
| H | 5.58760400  | 5.68188500  | 1.38928600  |
| H | 4.61979600  | 6.29160700  | 3.57415700  |
| H | 3.34649200  | 7.23911400  | 2.78509000  |
| H | 5.18637400  | 7.39142300  | 1.16395700  |
| H | 3.17481700  | 6.87066200  | -0.04035900 |
| C | 3.75429600  | 0.31215300  | -2.50249500 |
| C | 5.12457300  | 0.61230700  | -2.42147600 |
| C | 3.36546600  | -1.01376300 | -2.75996000 |
| C | 6.06415500  | -0.40887400 | -2.56766900 |
| H | 5.43398200  | 1.63320200  | -2.24696500 |
| C | 4.32151200  | -2.01498700 | -2.90798900 |
| H | 2.30904700  | -1.25350600 | -2.83863400 |
| C | 5.68326200  | -1.72866200 | -2.80798400 |
| H | 6.42358800  | -2.50900200 | -2.92489900 |
| O | -2.12858100 | -2.90251400 | -0.03033100 |
| C | -2.93410000 | -3.43453500 | -0.80807300 |
| C | -2.82774000 | -3.15862900 | -2.33263000 |
| H | -3.73186400 | -3.51239800 | -2.82718900 |
| N | -2.78532700 | -1.72016500 | -2.55091700 |
| C | -3.92050100 | -0.98381900 | -2.34952400 |
| N | -3.72351800 | 0.38292200  | -2.48462500 |
| H | -2.77258100 | 0.68057300  | -2.71887300 |
| C | -1.63167900 | -3.88677700 | -3.03488700 |
| H | -1.88913500 | -1.23721600 | -2.53330300 |

|   |             |             |             |
|---|-------------|-------------|-------------|
| C | -1.78068000 | -5.40678600 | -2.82240000 |
| H | -0.96986400 | -5.93615400 | -3.33501300 |
| H | -1.73352900 | -5.68012600 | -1.76207400 |
| H | -2.72780500 | -5.78017500 | -3.23089700 |
| C | -1.71283900 | -3.58875500 | -4.54689000 |
| H | -1.58525300 | -2.52282600 | -4.75634200 |
| H | -0.92449300 | -4.13435200 | -5.07815900 |
| H | -2.67833600 | -3.90133000 | -4.96369900 |
| C | -0.25580700 | -3.44231300 | -2.50457300 |
| H | -0.13187200 | -3.69376900 | -1.44878400 |
| H | 0.53815700  | -3.94381000 | -3.06764600 |
| H | -0.09821400 | -2.36343800 | -2.61777200 |
| N | -3.93504000 | -4.24775400 | -0.37149500 |
| C | -5.05038600 | -4.74941000 | -1.21371400 |
| C | -4.12058500 | -4.58470200 | 1.07475500  |
| C | -6.08201700 | -5.26482700 | -0.20348900 |
| H | -5.44693300 | -3.94324300 | -1.83410200 |
| C | -5.22012800 | -5.68157300 | 0.98806300  |
| H | -6.76754100 | -4.46043700 | 0.08221600  |
| H | -5.77529000 | -5.76492500 | 1.92587800  |
| H | -4.74214100 | -6.64941800 | 0.78842900  |
| H | -6.67878600 | -6.08595200 | -0.61115400 |
| H | -4.69906700 | -5.56179000 | -1.86168300 |
| C | -4.63263500 | 1.40073000  | -2.20101500 |
| C | -5.89708300 | 1.18517100  | -1.63078400 |
| C | -4.23403400 | 2.72177100  | -2.48528900 |
| C | -6.71318000 | 2.27548500  | -1.32355100 |
| H | -6.22874000 | 0.17356000  | -1.44565700 |
| C | -5.07418600 | 3.78989600  | -2.19051400 |
| H | -3.26641700 | 2.90040100  | -2.94265600 |
| C | -6.32320400 | 3.58333500  | -1.59713900 |
| H | -6.97488000 | 4.41771000  | -1.36965700 |
| C | 1.78544400  | 5.28106800  | 3.36000000  |
| H | 1.17690500  | 4.37702900  | 3.36640600  |
| H | 2.01884500  | 5.56177900  | 4.39182700  |
| H | 1.19855700  | 6.09636100  | 2.92434300  |
| C | -2.84053600 | -5.18031100 | 1.68891900  |
| H | -2.08468700 | -4.41641000 | 1.86716200  |
| H | -3.07269000 | -5.68257900 | 2.63372800  |
| H | -2.42794900 | -5.93400100 | 1.00996700  |
| O | -5.01494400 | -1.49933100 | -2.09041900 |
| O | 3.91006500  | 3.01830300  | -1.39256400 |
| C | 3.87042200  | 3.84241400  | 2.97976700  |
| C | 4.53352100  | 3.04037000  | 2.07155800  |
| C | 4.00079700  | 3.54120800  | 4.36746900  |
| C | 5.33273600  | 1.94049800  | 2.48961500  |
| H | 4.44349500  | 3.22202800  | 1.00451500  |
| C | 4.75743400  | 2.47815200  | 4.80394900  |
| H | 3.49973500  | 4.16249100  | 5.10345500  |
| C | 6.02739900  | 1.12389700  | 1.55548500  |
| C | 5.44931400  | 1.64512900  | 3.88536100  |
| H | 4.84024000  | 2.27007400  | 5.86852500  |
| C | 6.80091000  | 0.06624500  | 1.98340400  |
| H | 5.94714800  | 1.35252200  | 0.49678600  |
| C | 6.24801100  | 0.54378100  | 4.29499900  |
| C | 6.90965600  | -0.22828600 | 3.36584800  |
| H | 7.33804800  | -0.53360700 | 1.25517600  |
| H | 6.33368800  | 0.32408700  | 5.35690300  |
| H | 7.52447700  | -1.06352500 | 3.69065800  |
| C | -4.65464000 | -3.37740000 | 1.87357500  |
| C | -4.65296500 | -3.39350700 | 3.25712600  |

|    |             |             |             |
|----|-------------|-------------|-------------|
| C  | -5.24233300 | -2.26012300 | 1.21471500  |
| C  | -5.21273700 | -2.33642900 | 4.02442200  |
| H  | -4.22202200 | -4.23150200 | 3.79888500  |
| C  | -5.80346500 | -1.22360100 | 1.92749300  |
| H  | -5.24385800 | -2.21067600 | 0.13140200  |
| C  | -5.20448000 | -2.34385100 | 5.44696000  |
| C  | -5.80834100 | -1.22444700 | 3.34643800  |
| H  | -6.26255200 | -0.38875900 | 1.40287900  |
| C  | -5.75811700 | -1.30471700 | 6.16102800  |
| H  | -4.75494200 | -3.18875700 | 5.96415700  |
| C  | -6.37520500 | -0.16885400 | 4.11127000  |
| C  | -6.35036800 | -0.20668300 | 5.48756000  |
| H  | -5.74677800 | -1.32479400 | 7.24752900  |
| H  | -6.83528500 | 0.66521300  | 3.58609400  |
| H  | -6.78942700 | 0.60322300  | 6.06384300  |
| Cl | -0.49115700 | 0.76560600  | -2.62888300 |
| C  | -8.01678000 | 1.99879000  | -0.62397500 |
| C  | -4.62490200 | 5.20052300  | -2.46166200 |
| C  | 7.52001200  | -0.05899900 | -2.41709900 |
| C  | 3.84984700  | -3.42746500 | -3.12894900 |
| F  | 7.83936100  | 1.07386500  | -3.07704900 |
| F  | 7.84667300  | 0.15442700  | -1.11187500 |
| F  | 8.33446000  | -1.03651300 | -2.86590000 |
| F  | 4.86026200  | -4.26628100 | -3.43627400 |
| F  | 2.94248600  | -3.50166700 | -4.13225700 |
| F  | 3.23848100  | -3.92475700 | -2.02500700 |
| F  | -7.80689400 | 1.62188800  | 0.66959100  |
| F  | -8.70316400 | 0.99418500  | -1.20614300 |
| F  | -8.82408500 | 3.07864100  | -0.58702600 |
| F  | -3.62619200 | 5.25995600  | -3.36999600 |
| F  | -5.63570500 | 5.97118800  | -2.91603700 |
| F  | -4.16160600 | 5.80222100  | -1.33300700 |
| C  | -0.25931700 | 0.46074600  | 0.56168900  |
| H  | -1.25409000 | 0.51918700  | 0.13666200  |
| H  | 0.29978800  | 1.39166700  | 0.50338900  |
| C  | 0.40570200  | -0.79971100 | 0.54409100  |
| H  | -0.10388300 | -1.61475400 | 0.04052300  |
| C  | 1.57762000  | -0.99255500 | 1.22285500  |
| C  | 2.08071600  | 0.12090300  | 2.09649400  |
| H  | 3.00949800  | -0.14718500 | 2.60126800  |
| H  | 2.26449400  | 1.04079100  | 1.53211400  |
| C  | 1.01246700  | 0.45371100  | 3.20301000  |
| H  | 1.47287900  | 1.18864400  | 3.87244400  |
| H  | 0.81828300  | -0.44861100 | 3.78933500  |
| C  | -0.25530700 | 1.05683500  | 2.66820100  |
| H  | -0.19450500 | 2.12310700  | 2.46669500  |
| C  | -1.51000500 | 0.47912300  | 2.62139800  |
| C  | -2.71548500 | 1.31798700  | 2.29568300  |
| H  | -2.44617700 | 2.30762400  | 1.91701500  |
| H  | -3.31589900 | 1.44647600  | 3.20671000  |
| H  | -3.36617200 | 0.81410600  | 1.57204700  |
| C  | -1.78832200 | -0.95675100 | 2.94477600  |
| H  | -0.90979200 | -1.50089300 | 3.29336700  |
| H  | -2.18879200 | -1.47792100 | 2.06552500  |
| H  | -2.56587500 | -1.01192900 | 3.71634200  |
| C  | 2.24675700  | -2.30832700 | 1.23680500  |
| C  | 3.64546200  | -2.39689000 | 1.37015100  |
| C  | 1.51173200  | -3.50265700 | 1.09492400  |
| C  | 4.28742900  | -3.63080700 | 1.34624000  |
| H  | 4.24506800  | -1.49614500 | 1.45519200  |
| C  | 2.15266600  | -4.73592800 | 1.08458300  |

|   |            |             |            |
|---|------------|-------------|------------|
| H | 0.43017100 | -3.46578800 | 1.01069800 |
| C | 3.54315800 | -4.80399000 | 1.20770400 |
| H | 5.36803800 | -3.68075700 | 1.42739700 |
| H | 1.57433100 | -5.64757600 | 0.97777500 |
| C | 4.22932200 | -6.14258900 | 1.25728300 |
| F | 3.56728200 | -7.07502100 | 0.53887100 |
| F | 4.30960600 | -6.60988300 | 2.52690100 |
| F | 5.49187500 | -6.07961000 | 0.78273100 |

**TS-S-5:**

Imaginary frequency: -86.92 cm<sup>-1</sup>

E[B3LYP/6-31G(d)]: -5531.674061 Hartree

E[PCM(CyH)-B3LYP-D3(BJ)/6-311+G(d,p)]: -5533.640952 Hartree

Free energy correction: 1.305857 Hartree

Free energy correction – Grimme quasi-RRHO: 1.300626 Hartree

Free energy correction – Truhlar quasi-RRHO: 1.309042 Hartree

|   |             |             |             |
|---|-------------|-------------|-------------|
| O | 1.36211800  | 3.45249000  | 0.71201900  |
| C | 1.82772400  | 4.33835500  | -0.02162700 |
| C | 1.34134600  | 4.45001500  | -1.49220600 |
| H | 2.01749000  | 5.10048300  | -2.05038500 |
| N | 1.39610700  | 3.13685800  | -2.11256000 |
| C | 2.60095800  | 2.50540400  | -2.23659000 |
| N | 2.49832600  | 1.21040900  | -2.72920900 |
| H | 1.55160500  | 0.89384800  | -2.95558800 |
| C | -0.09030200 | 5.08026600  | -1.61753400 |
| H | 0.54472400  | 2.58852800  | -2.22068000 |
| C | -0.06071600 | 6.51264400  | -1.04714500 |
| H | -1.04524800 | 6.97826800  | -1.16540500 |
| H | 0.18525800  | 6.52689400  | 0.02055500  |
| H | 0.66645600  | 7.14126400  | -1.57541400 |
| C | -0.46141400 | 5.15819000  | -3.11421300 |
| H | -0.50466200 | 4.16830000  | -3.57792100 |
| H | -1.44727700 | 5.62188800  | -3.22914600 |
| H | 0.26582400  | 5.76017000  | -3.67288700 |
| C | -1.16828700 | 4.27092000  | -0.86857600 |
| H | -0.94247900 | 4.19874200  | 0.19880600  |
| H | -2.13754200 | 4.76608700  | -0.98152300 |
| H | -1.27105500 | 3.25478500  | -1.26563900 |
| N | 2.73994200  | 5.23705200  | 0.43191400  |
| C | 3.53043900  | 6.14865100  | -0.42950700 |
| C | 3.18582100  | 5.26630000  | 1.86189800  |
| C | 4.68162800  | 6.61045300  | 0.47228700  |
| H | 3.88439200  | 5.61531900  | -1.31459700 |
| C | 4.07163700  | 6.54648300  | 1.87330700  |
| H | 5.52823400  | 5.92160400  | 0.39045700  |
| H | 4.81415200  | 6.50903400  | 2.67441100  |
| H | 3.43112200  | 7.42124300  | 2.04485500  |
| H | 5.03519200  | 7.61029400  | 0.20408600  |
| H | 2.91763700  | 7.00083400  | -0.74783800 |
| C | 3.47794500  | 0.21953200  | -2.70499500 |
| C | 4.76752400  | 0.40738700  | -2.17795000 |
| C | 3.12974000  | -1.04838400 | -3.20631200 |
| C | 5.65706100  | -0.66581800 | -2.13154900 |
| H | 5.05107500  | 1.38447400  | -1.81618800 |
| C | 4.04229700  | -2.09842300 | -3.16627800 |
| H | 2.13963400  | -1.20523800 | -3.62232000 |
| C | 5.31760000  | -1.92435000 | -2.62673800 |
| H | 6.02276200  | -2.74605300 | -2.59516400 |

|   |             |             |             |
|---|-------------|-------------|-------------|
| O | -2.00130800 | -2.92811300 | 0.08649000  |
| C | -2.84786400 | -3.52344200 | -0.59551400 |
| C | -2.88671200 | -3.30714600 | -2.13302300 |
| H | -3.81666900 | -3.71202300 | -2.53131900 |
| N | -2.91734700 | -1.87849300 | -2.40886000 |
| C | -4.05451700 | -1.17221800 | -2.12844000 |
| N | -3.92154400 | 0.19340400  | -2.33519400 |
| H | -3.00927400 | 0.51146200  | -2.67361900 |
| C | -1.72943300 | -4.02198900 | -2.90963500 |
| H | -2.04184800 | -1.36635000 | -2.49796100 |
| C | -1.80964400 | -5.53768600 | -2.63742200 |
| H | -1.02506500 | -6.05903100 | -3.19695600 |
| H | -1.66887600 | -5.77282300 | -1.57624800 |
| H | -2.77325900 | -5.95398700 | -2.95587200 |
| C | -1.94433900 | -3.77940800 | -4.41849200 |
| H | -1.86790300 | -2.71832800 | -4.67265900 |
| H | -1.18566100 | -4.32069700 | -4.99548100 |
| H | -2.93059600 | -4.13371700 | -4.74308500 |
| C | -0.33025900 | -3.51794800 | -2.51005100 |
| H | -0.11436300 | -3.72587100 | -1.45947500 |
| H | 0.43048300  | -4.01949000 | -3.11694600 |
| H | -0.21471800 | -2.44023900 | -2.67322400 |
| N | -3.77016900 | -4.35835300 | -0.04171200 |
| C | -4.93404300 | -4.93473100 | -0.76126800 |
| C | -3.81192800 | -4.64601700 | 1.42615900  |
| C | -5.84727600 | -5.45404100 | 0.35547400  |
| H | -5.41936400 | -4.16839400 | -1.36901600 |
| C | -4.86444300 | -5.79004100 | 1.47702700  |
| H | -6.53954000 | -4.66852100 | 0.67541800  |
| H | -5.32937900 | -5.86105700 | 2.46364700  |
| H | -4.36361500 | -6.74410700 | 1.26728700  |
| H | -6.44108000 | -6.31374400 | 0.03160300  |
| H | -4.60791100 | -5.75545900 | -1.41181800 |
| C | -4.83564700 | 1.19209100  | -2.00440200 |
| C | -6.03262900 | 0.95952200  | -1.30883200 |
| C | -4.51284500 | 2.51258700  | -2.37437200 |
| C | -6.85467100 | 2.03475100  | -0.96644000 |
| H | -6.30917500 | -0.05392100 | -1.05564000 |
| C | -5.35878700 | 3.56451600  | -2.04038200 |
| H | -3.59943000 | 2.70324100  | -2.92822700 |
| C | -6.53866700 | 3.34237400  | -1.32397100 |
| H | -7.19540500 | 4.16401500  | -1.06672100 |
| C | 1.99018700  | 5.45505500  | 2.81239700  |
| H | 1.39814600  | 4.54437300  | 2.90093100  |
| H | 2.33774200  | 5.75406100  | 3.80650600  |
| H | 1.34811700  | 6.25776000  | 2.43533500  |
| C | -2.45672000 | -5.16313900 | 1.94236400  |
| H | -1.72121800 | -4.36306100 | 2.01700800  |
| H | -2.57948500 | -5.63089200 | 2.92465100  |
| H | -2.07614200 | -5.93000900 | 1.25944900  |
| O | -5.09986700 | -1.71205400 | -1.74566100 |
| O | 3.67039100  | 3.05253200  | -1.94306800 |
| C | 4.04237400  | 4.03534000  | 2.21735000  |
| C | 4.23961300  | 3.66125200  | 3.53482800  |
| C | 4.73139800  | 3.31243100  | 1.20246900  |
| C | 5.09954100  | 2.58715500  | 3.89296100  |
| H | 3.74189900  | 4.19252200  | 4.34159200  |
| C | 5.58163400  | 2.27642100  | 1.51574200  |
| H | 4.56235600  | 3.55373400  | 0.15944800  |
| C | 5.30121500  | 2.19435400  | 5.24466800  |
| C | 5.79189500  | 1.87629400  | 2.86073900  |

|    |             |             |             |
|----|-------------|-------------|-------------|
| H  | 6.10665400  | 1.74836200  | 0.72425200  |
| C  | 6.14176700  | 1.14941600  | 5.55724100  |
| H  | 4.78054700  | 2.73591100  | 6.03157700  |
| C  | 6.64981000  | 0.79926700  | 3.21383500  |
| C  | 6.82088700  | 0.44313400  | 4.53280500  |
| H  | 6.28791700  | 0.86096500  | 6.59478500  |
| H  | 7.16218700  | 0.26099900  | 2.41986200  |
| H  | 7.47898500  | -0.38097400 | 4.79445500  |
| C  | -4.32713300 | -3.43213800 | 2.22746500  |
| C  | -4.21057100 | -3.39941900 | 3.60582200  |
| C  | -5.01169000 | -2.36163300 | 1.58483200  |
| C  | -4.74650500 | -2.33734800 | 4.38312300  |
| H  | -3.70335600 | -4.20133000 | 4.13608800  |
| C  | -5.55217800 | -1.32176700 | 2.30860100  |
| H  | -5.10573500 | -2.35091100 | 0.50455800  |
| C  | -4.62077600 | -2.29441900 | 5.79946600  |
| C  | -5.43934900 | -1.27247600 | 3.72216100  |
| H  | -6.08510900 | -0.52298200 | 1.79784700  |
| C  | -5.15416100 | -1.25176700 | 6.52372700  |
| H  | -4.09709700 | -3.10353400 | 6.30399100  |
| C  | -5.98211900 | -0.21190500 | 4.49751200  |
| C  | -5.84245100 | -0.20036800 | 5.86738000  |
| H  | -5.05246500 | -1.23315300 | 7.60554800  |
| H  | -6.51617300 | 0.58589500  | 3.98617900  |
| H  | -6.26378700 | 0.61287300  | 6.45214100  |
| Cl | -0.73671900 | 0.67201100  | -2.82491900 |
| C  | -8.07738200 | 1.74503300  | -0.13790300 |
| C  | -4.98543600 | 4.97639900  | -2.40395400 |
| C  | 6.97438500  | -0.48894200 | -1.42918500 |
| C  | 3.62290300  | -3.46730200 | -3.63229700 |
| F  | 7.40279000  | 0.79077300  | -1.43402800 |
| F  | 6.87577800  | -0.84863900 | -0.10858300 |
| F  | 7.95054200  | -1.25279400 | -1.95573900 |
| F  | 4.65841000  | -4.16459600 | -4.14636400 |
| F  | 2.65841100  | -3.41287900 | -4.57821200 |
| F  | 3.12303200  | -4.20621000 | -2.60948200 |
| F  | -7.73575000 | 1.42610100  | 1.14307400  |
| F  | -8.77930100 | 0.69729100  | -0.61630600 |
| F  | -8.91503000 | 2.79965700  | -0.06460100 |
| F  | -4.08738000 | 5.03055200  | -3.41233500 |
| F  | -6.06147300 | 5.70091500  | -2.77703100 |
| F  | -4.42810100 | 5.63238500  | -1.35045900 |
| C  | -0.21449700 | 0.48777500  | 0.37654600  |
| H  | -1.24300400 | 0.47379200  | 0.03621700  |
| H  | 0.28582400  | 1.44475900  | 0.25210000  |
| C  | 0.51797600  | -0.73007300 | 0.35934000  |
| H  | 0.01996400  | -1.59536500 | -0.06615300 |
| C  | 1.75502200  | -0.82418800 | 0.94029900  |
| C  | 2.26037500  | 0.34506700  | 1.73388200  |
| H  | 3.24250700  | 0.14745600  | 2.16491300  |
| H  | 2.33917100  | 1.25581800  | 1.13183100  |
| C  | 1.27147700  | 0.65201500  | 2.92113100  |
| H  | 1.75275600  | 1.42377100  | 3.53162500  |
| H  | 1.17288800  | -0.24314100 | 3.54105300  |
| C  | -0.06223000 | 1.18205600  | 2.48379200  |
| H  | -0.06500000 | 2.24005500  | 2.23395000  |
| C  | -1.28743700 | 0.54946500  | 2.55282600  |
| C  | -2.55214500 | 1.32321400  | 2.29555400  |
| H  | -2.35818400 | 2.30945800  | 1.86516700  |
| H  | -3.08774700 | 1.45816400  | 3.24518100  |
| H  | -3.23191200 | 0.76659300  | 1.64059800  |

|   |             |             |             |
|---|-------------|-------------|-------------|
| C | -1.47427600 | -0.88329800 | 2.94977600  |
| H | -0.54492200 | -1.37852200 | 3.23389500  |
| H | -1.93065500 | -1.45291500 | 2.13012700  |
| H | -2.17408000 | -0.93960700 | 3.79251700  |
| C | 2.51291400  | -2.08960800 | 0.91975400  |
| C | 3.92019200  | -2.07014600 | 0.90300900  |
| C | 1.86118000  | -3.33797900 | 0.86824100  |
| C | 4.65050300  | -3.24954700 | 0.80929700  |
| H | 4.45431400  | -1.12701000 | 0.90780700  |
| C | 2.59135900  | -4.51877900 | 0.79375300  |
| H | 0.77719900  | -3.38429200 | 0.90178700  |
| C | 3.98789800  | -4.47784500 | 0.75784700  |
| H | 5.73291700  | -3.20681800 | 0.75612000  |
| H | 2.07790300  | -5.47339500 | 0.75527300  |
| C | 4.78553200  | -5.75351800 | 0.71618900  |
| F | 4.08221600  | -6.77394000 | 0.18097900  |
| F | 5.16281300  | -6.14253700 | 1.95780200  |
| F | 5.91683500  | -5.61101000 | -0.00872400 |

### TS-S-6:

Imaginary frequency: -65.66 cm<sup>-1</sup>

E[B3LYP/6-31G(d)]: -5531.676391 Hartree

E[PCM(CyH)-B3LYP-D3(BJ)/6-311+G(d,p)]: -5533.639594 Hartree

Free energy correction: 1.304150 Hartree

Free energy correction – Grimme quasi-RRHO: 1.299778 Hartree

Free energy correction – Truhlar quasi-RRHO: 1.308628 Hartree

|   |             |             |             |
|---|-------------|-------------|-------------|
| O | 1.59032500  | -3.18692400 | -1.61771100 |
| C | 2.20660100  | -4.09846200 | -1.04273000 |
| C | 1.79422800  | -4.51733600 | 0.39191100  |
| H | 2.55393600  | -5.17976400 | 0.80919000  |
| N | 1.74913400  | -3.34324300 | 1.24436200  |
| C | 2.90595300  | -2.71758300 | 1.62133000  |
| N | 2.68143500  | -1.60782700 | 2.41954100  |
| H | 1.70018300  | -1.36068300 | 2.57285300  |
| C | 0.44106200  | -5.31177300 | 0.43683200  |
| H | 0.86218200  | -2.87727400 | 1.42186100  |
| C | 0.58784800  | -6.59429000 | -0.40654200 |
| H | -0.33324700 | -7.18465000 | -0.34887500 |
| H | 0.77232000  | -6.37349800 | -1.46400900 |
| H | 1.40672100  | -7.22535600 | -0.04003300 |
| C | 0.16227700  | -5.71473200 | 1.90064700  |
| H | 0.04993900  | -4.84142600 | 2.54960900  |
| H | -0.76687000 | -6.29242900 | 1.95799900  |
| H | 0.97388600  | -6.33231900 | 2.30464100  |
| C | -0.75459600 | -4.49880100 | -0.09938800 |
| H | -0.61043300 | -4.22522200 | -1.14801300 |
| H | -1.66868800 | -5.09633900 | -0.02015700 |
| H | -0.91763600 | -3.57866000 | 0.47338500  |
| N | 3.23421100  | -4.75954400 | -1.63644300 |
| C | 4.15630600  | -5.69281800 | -0.94213600 |
| C | 3.64955700  | -4.49369000 | -3.04835000 |
| C | 5.32616100  | -5.85540600 | -1.91955200 |
| H | 4.46692700  | -5.26926300 | 0.01525500  |
| C | 4.66836000  | -5.64550400 | -3.28384000 |
| H | 6.08185100  | -5.08483900 | -1.73723800 |
| H | 5.37658000  | -5.39798100 | -4.07916400 |
| H | 4.12313900  | -6.54955600 | -3.58477000 |
| H | 5.80922100  | -6.83180900 | -1.82105800 |



|   |             |             |             |
|---|-------------|-------------|-------------|
| H | 3.65998000  | -6.65506400 | -0.76537600 |
| C | 3.61323900  | -0.69509000 | 2.90667900  |
| C | 5.00351300  | -0.86427100 | 2.82075500  |
| C | 3.10626200  | 0.45752700  | 3.53695600  |
| C | 5.85035900  | 0.12332600  | 3.32986300  |
| H | 5.40111800  | -1.76133100 | 2.36665600  |
| C | 3.96913600  | 1.42038700  | 4.04682900  |
| H | 2.03213100  | 0.58691100  | 3.62555200  |
| C | 5.35503200  | 1.27057300  | 3.94449300  |
| H | 6.02525100  | 2.02011900  | 4.34539500  |
| O | -2.02022800 | 2.92288800  | -0.10077800 |
| C | -2.80084100 | 3.37472000  | 0.74950100  |
| C | -2.68647200 | 2.90715900  | 2.22514400  |
| H | -3.56366400 | 3.24014700  | 2.78071600  |
| N | -2.69945300 | 1.45445900  | 2.27109900  |
| C | -3.86032500 | 0.76639100  | 2.05420400  |
| N | -3.69484400 | -0.60927000 | 2.12905800  |
| H | -2.74114100 | -0.93675100 | 2.30786400  |
| C | -1.43999100 | 3.49486200  | 2.97570100  |
| H | -1.82137700 | 0.94114200  | 2.28659300  |
| C | -1.54446700 | 5.03330100  | 2.98100700  |
| H | -0.69918200 | 5.46202400  | 3.53051400  |
| H | -1.52400100 | 5.45030000  | 1.96764200  |
| H | -2.46398400 | 5.37320500  | 3.47320600  |
| C | -1.47193200 | 2.99371000  | 4.43537100  |
| H | -1.39454500 | 1.90411300  | 4.49325100  |
| H | -0.62844300 | 3.41677600  | 4.99256000  |
| H | -2.39868100 | 3.29315600  | 4.94036300  |
| C | -0.09871400 | 3.09081400  | 2.33365600  |
| H | -0.00506200 | 3.48429700  | 1.31891500  |
| H | 0.72908500  | 3.48839200  | 2.92993000  |
| H | 0.03006400  | 2.00331600  | 2.28811500  |
| N | -3.77136200 | 4.27645400  | 0.43747000  |
| C | -4.86427800 | 4.69819100  | 1.34944800  |
| C | -3.93681400 | 4.83194800  | -0.94075400 |
| C | -5.86563200 | 5.40829100  | 0.43072500  |
| H | -5.29920900 | 3.82738600  | 1.84449900  |
| C | -4.97988700 | 5.95723100  | -0.68786500 |
| H | -6.58632500 | 4.68930900  | 0.02848300  |
| H | -5.52864100 | 6.20773800  | -1.59984300 |
| H | -4.45585400 | 6.86032700  | -0.34873700 |
| H | -6.42437800 | 6.18673800  | 0.95827600  |
| H | -4.47760800 | 5.38717400  | 2.11047500  |
| C | -4.64086400 | -1.60392700 | 1.89689700  |
| C | -6.00694900 | -1.36087700 | 1.68242800  |
| C | -4.17874700 | -2.93457700 | 1.89008500  |
| C | -6.86748200 | -2.43297100 | 1.43553600  |
| H | -6.37628300 | -0.34550500 | 1.72065600  |
| C | -5.05733800 | -3.98554600 | 1.65258600  |
| H | -3.12842900 | -3.13380400 | 2.07895800  |
| C | -6.41410700 | -3.74966400 | 1.41470100  |
| H | -7.09701000 | -4.56999500 | 1.23448700  |
| C | 2.46252400  | -4.63943500 | -4.01931300 |
| H | 1.78147200  | -3.79131200 | -3.95487300 |
| H | 2.82187400  | -4.73398400 | -5.04891300 |
| H | 1.90759500  | -5.55293500 | -3.78139700 |
| C | -2.62593900 | 5.44562900  | -1.46916300 |
| H | -1.92246900 | 4.67991200  | -1.79436900 |
| H | -2.83392500 | 6.11826700  | -2.30761100 |
| H | -2.15918500 | 6.04271800  | -0.67862700 |
| O | -4.94169100 | 1.32386900  | 1.82683500  |

|    |             |             |             |
|----|-------------|-------------|-------------|
| O  | 4.02679900  | -3.12316800 | 1.28714200  |
| C  | 4.36653600  | -3.13825500 | -3.18730700 |
| C  | 4.85981700  | -2.45070900 | -2.09529400 |
| C  | 4.61458600  | -2.60711100 | -4.48731200 |
| C  | 5.60443500  | -1.24749200 | -2.24264800 |
| H  | 4.67989400  | -2.81134300 | -1.08663700 |
| C  | 5.32239100  | -1.44052400 | -4.66393700 |
| H  | 4.24714900  | -3.13285100 | -5.36338500 |
| C  | 6.13014500  | -0.55187700 | -1.11955700 |
| C  | 5.84430000  | -0.72459800 | -3.55370700 |
| H  | 5.49995800  | -1.05858700 | -5.66700300 |
| C  | 6.86194900  | 0.60336700  | -1.28547300 |
| H  | 5.95166600  | -0.95031400 | -0.12517100 |
| C  | 6.59581200  | 0.47346400  | -3.69304600 |
| C  | 7.09643700  | 1.12133200  | -2.58418200 |
| H  | 7.26589900  | 1.11203600  | -0.41583100 |
| H  | 6.77934000  | 0.86492600  | -4.69125500 |
| H  | 7.68302400  | 2.02881500  | -2.70275900 |
| C  | -4.52789500 | 3.78891900  | -1.90688100 |
| C  | -5.12405000 | 2.62570100  | -1.46002400 |
| C  | -4.53771500 | 4.05706900  | -3.30715100 |
| C  | -5.73296300 | 1.70471400  | -2.35663000 |
| H  | -5.13061200 | 2.37841200  | -0.40250500 |
| C  | -5.11139600 | 3.18350500  | -4.20188000 |
| H  | -4.08662900 | 4.97009300  | -3.68371500 |
| C  | -6.35734100 | 0.51376400  | -1.89469000 |
| C  | -5.72495600 | 1.98044400  | -3.76132700 |
| H  | -5.10456200 | 3.41196700  | -5.26555200 |
| C  | -6.93826500 | -0.36679400 | -2.78063400 |
| H  | -6.37634300 | 0.31278600  | -0.82736400 |
| C  | -6.32710700 | 1.05031400  | -4.65095200 |
| C  | -6.91897900 | -0.09803800 | -4.17202300 |
| H  | -7.42211200 | -1.26374600 | -2.40664600 |
| H  | -6.31964400 | 1.26408100  | -5.71761600 |
| H  | -7.38276200 | -0.79920300 | -4.86089000 |
| Cl | -0.52071500 | -1.12632500 | 2.31562100  |
| C  | -8.31150900 | -2.12455800 | 1.14297600  |
| C  | -4.52484800 | -5.39163600 | 1.58190900  |
| C  | 7.33349600  | -0.06941500 | 3.16320600  |
| C  | 3.39925600  | 2.67289100  | 4.65777800  |
| F  | 7.72813600  | -1.30385600 | 3.54146200  |
| F  | 7.70647300  | 0.06789300  | 1.86096500  |
| F  | 8.05463600  | 0.82368300  | 3.87197400  |
| F  | 4.20811900  | 3.18552900  | 5.60936800  |
| F  | 2.18858600  | 2.46060000  | 5.22271300  |
| F  | 3.22496400  | 3.64761500  | 3.72820700  |
| F  | -8.45799300 | -1.58186700 | -0.09645000 |
| F  | -8.82381700 | -1.22944700 | 2.01321400  |
| F  | -9.09218800 | -3.22452500 | 1.18204800  |
| F  | -3.43906300 | -5.56833700 | 2.36815700  |
| F  | -5.44820400 | -6.30376700 | 1.95061600  |
| F  | -4.14190700 | -5.71611500 | 0.31769600  |
| C  | -0.19747400 | -0.48646200 | -0.88314900 |
| H  | -1.14340600 | -0.60650100 | -0.36917700 |
| H  | 0.39888800  | -1.39389900 | -0.94427600 |
| C  | 0.40706700  | 0.79564600  | -0.90103200 |
| H  | -0.08832700 | 1.58237200  | -0.34091400 |
| C  | 1.49361600  | 1.05742500  | -1.69775000 |
| C  | 1.94783100  | -0.00954600 | -2.64853600 |
| H  | 2.81874500  | 0.30334200  | -3.22546100 |
| H  | 2.20480100  | -0.94198400 | -2.13656000 |

|   |             |             |             |
|---|-------------|-------------|-------------|
| C | 0.79271800  | -0.33875100 | -3.67136900 |
| H | 1.22089300  | -1.02680700 | -4.40878900 |
| H | 0.51849500  | 0.57729200  | -4.20160300 |
| C | -0.40159900 | -1.00870100 | -3.05809600 |
| H | -0.28933100 | -2.07854700 | -2.89939200 |
| C | -1.65915600 | -0.47423000 | -2.86567900 |
| C | -2.80307000 | -1.36042500 | -2.45378800 |
| H | -2.47234500 | -2.36012000 | -2.15940700 |
| H | -3.50302000 | -1.45914600 | -3.29448200 |
| H | -3.37912700 | -0.91409600 | -1.63540600 |
| C | -2.00567700 | 0.96424700  | -3.10553900 |
| H | -1.18699800 | 1.54182600  | -3.53651400 |
| H | -2.30840400 | 1.45205500  | -2.16965300 |
| H | -2.87072300 | 1.02706900  | -3.77672600 |
| C | 2.08752400  | 2.40646600  | -1.75974400 |
| C | 3.45046900  | 2.57300800  | -2.07203000 |
| C | 1.31679100  | 3.55712000  | -1.49182700 |
| C | 4.02519100  | 3.83924100  | -2.10797600 |
| H | 4.08280100  | 1.70952400  | -2.24741900 |
| C | 1.88913800  | 4.82279300  | -1.54229800 |
| H | 0.26044700  | 3.46235000  | -1.26117600 |
| C | 3.24506800  | 4.96848000  | -1.85081500 |
| H | 5.08211400  | 3.94506700  | -2.32734400 |
| H | 1.28322000  | 5.69987300  | -1.34048000 |
| C | 3.84604000  | 6.34399500  | -1.96591500 |
| F | 3.24897400  | 7.22453200  | -1.13374100 |
| F | 3.71349500  | 6.83737900  | -3.22045600 |
| F | 5.16607300  | 6.34246200  | -1.68185600 |

#### TS-S-7:

Imaginary frequency: -71.43 cm<sup>-1</sup>

E[B3LYP/6-31G(d)]: -5531.675733 Hartree

E[PCM(CyH)-B3LYP-D3(BJ)/6-311+G(d,p)]: -5533.638942 Hartree

Free energy correction: 1.303681 Hartree

Free energy correction – Grimme quasi-RRHO: 1.299456 Hartree

Free energy correction – Truhlar quasi-RRHO: 1.308500 Hartree

|   |             |            |             |
|---|-------------|------------|-------------|
| O | -1.77714500 | 3.32780000 | -1.35252500 |
| C | -2.52831100 | 4.11271500 | -0.75202500 |
| C | -2.24292800 | 4.46554400 | 0.73017500  |
| H | -3.10494800 | 4.98441700 | 1.15041700  |
| N | -2.08447600 | 3.24344900 | 1.49823400  |
| C | -3.17879500 | 2.47934500 | 1.79764800  |
| N | -2.86708100 | 1.34773400 | 2.53396200  |
| H | -1.87178800 | 1.18713100 | 2.70875400  |
| C | -1.01623200 | 5.42489800 | 0.91378000  |
| H | -1.15691500 | 2.85802600 | 1.66242500  |
| C | -1.29021200 | 6.73905600 | 0.15488100  |
| H | -0.45577200 | 7.43377600 | 0.30131000  |
| H | -1.39853900 | 6.57748000 | -0.92354400 |
| H | -2.19814100 | 7.23376800 | 0.52086400  |
| C | -0.87527300 | 5.74577700 | 2.41688800  |
| H | -0.64234600 | 4.85315100 | 3.00443900  |
| H | -0.06533300 | 6.46846100 | 2.56897800  |
| H | -1.79748800 | 6.18327700 | 2.81871000  |
| C | 0.30409400  | 4.82007800 | 0.39876700  |
| H | 0.25782400  | 4.61771300 | -0.67469800 |
| H | 1.12472200  | 5.52022100 | 0.58221100  |
| H | 0.55505400  | 3.88429900 | 0.91166900  |

|   |             |             |             |
|---|-------------|-------------|-------------|
| N | -3.60090900 | 4.69048400  | -1.35415900 |
| C | -4.65522200 | 5.46207200  | -0.64816000 |
| C | -3.92416900 | 4.47935700  | -2.79885300 |
| C | -5.78536900 | 5.57989000  | -1.67752400 |
| H | -4.96579700 | 4.93321400  | 0.25545500  |
| C | -5.04235200 | 5.53919900  | -3.01306100 |
| H | -6.46563000 | 4.72664400  | -1.59318600 |
| H | -5.68074400 | 5.28290400  | -3.86286100 |
| H | -4.57777300 | 6.51227600  | -3.21902500 |
| H | -6.37096000 | 6.49328100  | -1.53901500 |
| H | -4.27686600 | 6.45353400  | -0.37124100 |
| C | -3.73054600 | 0.34415200  | 2.96776100  |
| C | -5.12336400 | 0.37698300  | 2.79864000  |
| C | -3.15302400 | -0.75833400 | 3.62684400  |
| C | -5.89983000 | -0.69096600 | 3.25391500  |
| H | -5.57875000 | 1.23510200  | 2.32468100  |
| C | -3.94888500 | -1.80221000 | 4.08473200  |
| H | -2.07902400 | -0.78442500 | 3.78153500  |
| C | -5.33408900 | -1.78752200 | 3.89815800  |
| H | -5.95126800 | -2.60069100 | 4.25826000  |
| O | 2.10694600  | -2.77090600 | -0.08598000 |
| C | 2.84068500  | -3.24780000 | 0.79134300  |
| C | 2.64543200  | -2.82795000 | 2.27321000  |
| H | 3.49641200  | -3.17107400 | 2.86281700  |
| N | 2.63654500  | -1.37685500 | 2.36671300  |
| C | 3.79075900  | -0.67461600 | 2.17097800  |
| N | 3.61429400  | 0.70121400  | 2.25035300  |
| H | 2.65452600  | 1.02460400  | 2.40454700  |
| C | 1.36784800  | -3.45189000 | 2.93594600  |
| H | 1.75194700  | -0.87460100 | 2.37555000  |
| C | 1.48559400  | -4.98887100 | 2.89539700  |
| H | 0.62006000  | -5.44090100 | 3.39206500  |
| H | 1.51412500  | -5.37263600 | 1.86933100  |
| H | 2.38482200  | -5.33820800 | 3.41754800  |
| C | 1.31914100  | -3.00202800 | 4.41187900  |
| H | 1.23590500  | -1.91509800 | 4.50405400  |
| H | 0.44896200  | -3.44486400 | 4.90838100  |
| H | 2.21916300  | -3.31751000 | 4.95415900  |
| C | 0.05946000  | -3.03656000 | 2.23540300  |
| H | 0.03187500  | -3.38085900 | 1.19904400  |
| H | -0.79280400 | -3.47695900 | 2.76257600  |
| H | -0.08622600 | -1.95012700 | 2.23394700  |
| N | 3.82197700  | -4.14636600 | 0.50487400  |
| C | 4.87801400  | -4.58173300 | 1.45215700  |
| C | 4.03838000  | -4.68307500 | -0.87383100 |
| C | 5.92086100  | -5.26474100 | 0.55960900  |
| H | 5.28510800  | -3.71908800 | 1.98376000  |
| C | 5.08242100  | -5.80289400 | -0.59988800 |
| H | 6.64758600  | -4.53104300 | 0.19661500  |
| H | 5.66655500  | -6.03358200 | -1.49494000 |
| H | 4.55519700  | -6.71616500 | -0.29453100 |
| H | 6.46845100  | -6.04655800 | 1.09389800  |
| H | 4.46616300  | -5.29055200 | 2.18126800  |
| C | 4.54570000  | 1.68472000  | 1.92341000  |
| C | 5.93183100  | 1.45818800  | 1.85586900  |
| C | 4.05748900  | 2.97629400  | 1.65938000  |
| C | 6.78473700  | 2.50208100  | 1.49697400  |
| H | 6.31887900  | 0.47463200  | 2.08148100  |
| C | 4.92906400  | 4.00137800  | 1.30003100  |
| H | 2.99062300  | 3.16752300  | 1.73230900  |
| C | 6.30287500  | 3.77902900  | 1.20905800  |

|    |             |             |             |
|----|-------------|-------------|-------------|
| H  | 6.97727400  | 4.57871900  | 0.93199300  |
| C  | -2.71875700 | 4.80184200  | -3.70191100 |
| H  | -1.95877900 | 4.02255000  | -3.65602500 |
| H  | -3.04437500 | 4.92608000  | -4.73959100 |
| H  | -2.26824100 | 5.74815600  | -3.38470400 |
| C  | 2.75030800  | -5.30238000 | -1.45010000 |
| H  | 2.05693100  | -4.53918800 | -1.80208000 |
| H  | 2.99135800  | -5.97327000 | -2.28103100 |
| H  | 2.25742200  | -5.90213400 | -0.67770800 |
| O  | 4.88056500  | -1.21829800 | 1.95303300  |
| O  | -4.32582800 | 2.79325800  | 1.45326400  |
| C  | -4.49873200 | 3.07375200  | -3.05391400 |
| C  | -4.94906000 | 2.26465800  | -2.02868900 |
| C  | -4.66356300 | 2.61803900  | -4.39514500 |
| C  | -5.57469600 | 1.01253400  | -2.28308300 |
| H  | -4.83096700 | 2.56690500  | -0.99210600 |
| C  | -5.25483300 | 1.40768200  | -4.67518000 |
| H  | -4.32608600 | 3.23828900  | -5.22007300 |
| C  | -6.06237000 | 0.19299600  | -1.22849600 |
| C  | -5.73556400 | 0.56849800  | -3.63466600 |
| H  | -5.37235300 | 1.08556500  | -5.70763800 |
| C  | -6.68446500 | -1.00590300 | -1.49776200 |
| H  | -5.94368300 | 0.53131700  | -0.20335000 |
| C  | -6.37470300 | -0.67682900 | -3.88116200 |
| C  | -6.84214300 | -1.44504800 | -2.83636300 |
| H  | -7.06114000 | -1.61093500 | -0.67902400 |
| H  | -6.50030800 | -1.00793000 | -4.90974100 |
| H  | -7.34381700 | -2.38841200 | -3.03641700 |
| C  | 4.64883000  | -3.62568300 | -1.81107900 |
| C  | 5.23677400  | -2.47046300 | -1.33427200 |
| C  | 4.68543800  | -3.87205200 | -3.21487800 |
| C  | 5.86431000  | -1.53698300 | -2.20473300 |
| H  | 5.21840800  | -2.23817400 | -0.27348600 |
| C  | 5.27606700  | -2.98524100 | -4.08463200 |
| H  | 4.23979800  | -4.77779800 | -3.61450600 |
| C  | 6.48005700  | -0.35381900 | -1.71291800 |
| C  | 5.88246300  | -1.79059500 | -3.61348000 |
| H  | 5.28745600  | -3.19586600 | -5.15190300 |
| C  | 7.07740100  | 0.54021900  | -2.57423600 |
| H  | 6.48063800  | -0.17055200 | -0.64231100 |
| C  | 6.50069200  | -0.84676000 | -4.47726800 |
| C  | 7.08354200  | 0.29388300  | -3.96975700 |
| H  | 7.55624900  | 1.42985500  | -2.17715700 |
| H  | 6.51268600  | -1.04395900 | -5.54708600 |
| H  | 7.55979200  | 1.00575600  | -4.63890400 |
| Cl | 0.40564400  | 1.19375200  | 2.45887400  |
| C  | 8.25553600  | 2.21029000  | 1.36274400  |
| C  | 4.34565200  | 5.33871500  | 0.93508600  |
| C  | -7.38151300 | -0.63970500 | 2.99538400  |
| C  | -3.30718400 | -2.99603600 | 4.73948900  |
| F  | -7.91987900 | 0.53854600  | 3.37603500  |
| F  | -7.65605000 | -0.77383000 | 1.66889900  |
| F  | -8.05303400 | -1.61954200 | 3.63487500  |
| F  | -4.10649000 | -3.54851000 | 5.67665600  |
| F  | -2.13460100 | -2.68377800 | 5.33696100  |
| F  | -3.03383100 | -3.97518500 | 3.83801000  |
| F  | 8.53196700  | 1.60493700  | 0.17580800  |
| F  | 8.69878300  | 1.37994600  | 2.32861100  |
| F  | 9.00604300  | 3.33130900  | 1.41066000  |
| F  | 3.43766300  | 5.76179200  | 1.84461100  |
| F  | 5.28306700  | 6.30025000  | 0.81990100  |

|   |             |             |             |
|---|-------------|-------------|-------------|
| F | 3.69059700  | 5.27863200  | -0.25669800 |
| C | 0.25620600  | 0.76488500  | -0.76737000 |
| H | 1.14767600  | 0.90909000  | -0.16990500 |
| H | -0.40782600 | 1.62601600  | -0.79351100 |
| C | -0.24424900 | -0.55152700 | -0.93667700 |
| H | 0.26437100  | -1.34789000 | -0.40152400 |
| C | -1.24769600 | -0.81760100 | -1.83472600 |
| C | -1.70505100 | 0.29557700  | -2.73102700 |
| H | -2.49837500 | -0.02631000 | -3.40659500 |
| H | -2.07830000 | 1.15516600  | -2.16547900 |
| C | -0.50248100 | 0.79974100  | -3.61695000 |
| H | -0.92073000 | 1.52059700  | -4.32852200 |
| H | -0.11544600 | -0.04131600 | -4.19854100 |
| C | 0.58652900  | 1.49420500  | -2.85041400 |
| H | 0.38304100  | 2.53632000  | -2.61462200 |
| C | 1.86674100  | 1.03772800  | -2.61108100 |
| C | 2.91104900  | 1.95942200  | -2.04254300 |
| H | 2.49877200  | 2.90633300  | -1.68385200 |
| H | 3.65303400  | 2.18045800  | -2.82202700 |
| H | 3.46570200  | 1.47848600  | -1.22890300 |
| C | 2.33702200  | -0.34721800 | -2.94230900 |
| H | 1.59760800  | -0.94107100 | -3.48035900 |
| H | 2.60873300  | -0.89473800 | -2.03030300 |
| H | 3.24961700  | -0.29136100 | -3.54785400 |
| C | -1.74376700 | -2.19105500 | -2.04391300 |
| C | -3.05869500 | -2.41470800 | -2.49548800 |
| C | -0.92821600 | -3.31100400 | -1.77756100 |
| C | -3.54458800 | -3.70641200 | -2.66961100 |
| H | -3.72766300 | -1.58030100 | -2.67428400 |
| C | -1.41067200 | -4.60083500 | -1.96598300 |
| H | 0.09269100  | -3.17286500 | -1.43645000 |
| C | -2.71987400 | -4.80350900 | -2.41330900 |
| H | -4.56834200 | -3.85649900 | -2.99459700 |
| H | -0.77011700 | -5.45279600 | -1.76336600 |
| C | -3.21718300 | -6.19992700 | -2.67524300 |
| F | -2.64374300 | -7.10128500 | -1.84855100 |
| F | -2.93814200 | -6.59479400 | -3.94063400 |
| F | -4.55527400 | -6.29589600 | -2.52015400 |

#### TS-S-8:

Imaginary frequency: -129.92 cm<sup>-1</sup>

E[B3LYP/6-31G(d)]: -5531.667936 Hartree

E[PCM(CyH)-B3LYP-D3(BJ)/6-311+G(d,p)]: -5533.628361 Hartree

Free energy correction: 1.305201 Hartree

Free energy correction – Grimme quasi-RRHO: 1.299931 Hartree

Free energy correction – Truhlar quasi-RRHO: 1.308040 Hartree

|   |             |             |            |
|---|-------------|-------------|------------|
| O | -4.46972100 | 2.64223300  | 0.39716300 |
| C | -5.03249800 | 2.34496500  | 1.46229500 |
| C | -4.19812100 | 2.23246000  | 2.76450100 |
| H | -4.79281800 | 1.73235800  | 3.53047800 |
| N | -3.03512200 | 1.39742500  | 2.52334700 |
| C | -3.20663100 | 0.06033600  | 2.30019500 |
| N | -2.02615700 | -0.61350300 | 2.01887100 |
| H | -1.18850800 | -0.03431700 | 1.93000600 |
| C | -3.79283600 | 3.62692800  | 3.35993000 |
| H | -2.13040000 | 1.82219500  | 2.31996800 |
| C | -5.07369400 | 4.41244000  | 3.70775100 |
| H | -4.80829200 | 5.37424600  | 4.16057600 |

|   |             |             |            |
|---|-------------|-------------|------------|
| H | -5.68239800 | 4.62280100  | 2.82126400 |
| H | -5.69568600 | 3.87024100  | 4.43032400 |
| C | -3.00043200 | 3.38246800  | 4.66201800 |
| H | -2.05135900 | 2.87317800  | 4.47302600 |
| H | -2.77607900 | 4.34028200  | 5.14591200 |
| H | -3.57648100 | 2.77485100  | 5.37073200 |
| C | -2.93574400 | 4.47129800  | 2.39530900 |
| H | -3.47155800 | 4.68280500  | 1.46577300 |
| H | -2.68957700 | 5.42656000  | 2.87452900 |
| H | -1.98928300 | 3.98166900  | 2.14267400 |
| N | -6.37290700 | 2.13268400  | 1.53218700 |
| C | -7.07775500 | 1.52960500  | 2.68985800 |
| C | -7.27283400 | 2.33049600  | 0.35425100 |
| C | -8.44211000 | 1.12162500  | 2.12160700 |
| H | -6.51108200 | 0.67688500  | 3.06989800 |
| C | -8.67275400 | 2.14407000  | 1.00809100 |
| H | -8.39322900 | 0.10960500  | 1.70756800 |
| H | -9.41950900 | 1.83149100  | 0.27320400 |
| H | -8.99844800 | 3.10138500  | 1.43525700 |
| H | -9.22480800 | 1.13563700  | 2.88555200 |
| H | -7.19508000 | 2.26823200  | 3.49219500 |
| C | -1.88678200 | -1.96304600 | 1.68251900 |
| C | -2.91305100 | -2.90690700 | 1.84239200 |
| C | -0.64483800 | -2.38595400 | 1.16658600 |
| C | -2.70382400 | -4.23121000 | 1.45047000 |
| H | -3.85693100 | -2.59697100 | 2.26680100 |
| C | -0.46370800 | -3.71036500 | 0.78272000 |
| H | 0.17608700  | -1.68135700 | 1.07424000 |
| C | -1.49189700 | -4.64876700 | 0.91103400 |
| H | -1.34433300 | -5.67630900 | 0.60209200 |
| O | 2.90924300  | -1.71670000 | 2.40172400 |
| C | 3.88081300  | -1.26210600 | 3.01027200 |
| C | 3.70347700  | -0.00458900 | 3.89528500 |
| H | 4.67227800  | 0.35939500  | 4.23455500 |
| N | 3.13695500  | 1.06670400  | 3.08443500 |
| C | 3.95216800  | 1.78463500  | 2.24644800 |
| N | 3.24100600  | 2.66997000  | 1.44469200 |
| H | 2.22236900  | 2.63814300  | 1.53705700 |
| C | 2.84519700  | -0.26958800 | 5.17856600 |
| H | 2.16070900  | 0.97593500  | 2.81375100 |
| C | 3.46426000  | -1.45036400 | 5.95303900 |
| H | 2.93322900  | -1.59675000 | 6.90074400 |
| H | 3.39756100  | -2.38670300 | 5.38871400 |
| H | 4.51967500  | -1.26748600 | 6.19162200 |
| C | 2.90264300  | 0.99320300  | 6.06158900 |
| H | 2.50869500  | 1.86605800  | 5.53206300 |
| H | 2.30668200  | 0.84781700  | 6.97059200 |
| H | 3.93165400  | 1.21973300  | 6.36821400 |
| C | 1.37350000  | -0.59687400 | 4.85437000 |
| H | 1.29390300  | -1.45862600 | 4.18786100 |
| H | 0.83537000  | -0.82023800 | 5.78377200 |
| H | 0.86117800  | 0.24942900  | 4.38178200 |
| N | 5.12390800  | -1.82020100 | 2.92804100 |
| C | 6.37004900  | -1.24733200 | 3.48388300 |
| C | 5.36351500  | -3.05449200 | 2.12079900 |
| C | 7.48264700  | -1.99388200 | 2.73800600 |
| H | 6.40755700  | -0.17000400 | 3.31009800 |
| C | 6.85462200  | -3.35920300 | 2.45291600 |
| H | 7.72112000  | -1.47823800 | 1.80240300 |
| H | 7.34156600  | -3.90484900 | 1.63994100 |
| H | 6.89742500  | -3.98695000 | 3.35239100 |

|    |             |             |             |
|----|-------------|-------------|-------------|
| H  | 8.40146000  | -2.05927000 | 3.32879400  |
| H  | 6.43201200  | -1.43663300 | 4.56479700  |
| C  | 3.72544500  | 3.45820000  | 0.41002800  |
| C  | 5.07701600  | 3.52775200  | 0.03149700  |
| C  | 2.78475600  | 4.23148300  | -0.29853300 |
| C  | 5.45154900  | 4.32723700  | -1.04973900 |
| H  | 5.80975400  | 2.96040700  | 0.58810800  |
| C  | 3.18707400  | 5.03536700  | -1.35879900 |
| H  | 1.74238900  | 4.19731000  | 0.00123200  |
| C  | 4.52580500  | 5.09112900  | -1.75638400 |
| H  | 4.83715300  | 5.71920200  | -2.58169000 |
| C  | -7.14774100 | 3.75939600  | -0.20739100 |
| H  | -6.21928100 | 3.90011800  | -0.76049800 |
| H  | -7.99295600 | 3.98755700  | -0.86443500 |
| H  | -7.17434800 | 4.47700600  | 0.61914100  |
| C  | 4.47952900  | -4.21535000 | 2.61110100  |
| H  | 3.44242500  | -4.09397700 | 2.30566300  |
| H  | 4.85693300  | -5.17055100 | 2.23013100  |
| H  | 4.52611200  | -4.26025900 | 3.70457200  |
| O  | 5.18216600  | 1.68294600  | 2.23419800  |
| O  | -4.31952000 | -0.48101000 | 2.35573400  |
| C  | -7.05674800 | 1.24562600  | -0.71639900 |
| C  | -6.43883600 | 0.04424200  | -0.42541500 |
| C  | -7.58437500 | 1.43135200  | -2.02743100 |
| C  | -6.32739300 | -0.99381000 | -1.39091100 |
| H  | -6.00029700 | -0.12920800 | 0.55303400  |
| C  | -7.48041900 | 0.45220900  | -2.98956200 |
| H  | -8.08452600 | 2.36086300  | -2.28095400 |
| C  | -5.70743500 | -2.23636000 | -1.08389900 |
| C  | -6.85251900 | -0.78994700 | -2.70694700 |
| H  | -7.89268500 | 0.61969600  | -3.98236400 |
| C  | -5.60916800 | -3.22802300 | -2.03560100 |
| H  | -5.31799400 | -2.39658300 | -0.08294400 |
| C  | -6.72899200 | -1.82858700 | -3.66906300 |
| C  | -6.12085900 | -3.02041300 | -3.34168900 |
| H  | -5.14949300 | -4.17647800 | -1.77508400 |
| H  | -7.13010100 | -1.66956500 | -4.66762700 |
| H  | -6.03872500 | -3.81106700 | -4.08274300 |
| C  | 5.21032200  | -2.77059500 | 0.61464700  |
| C  | 5.43743700  | -1.51220300 | 0.08999400  |
| C  | 4.90867300  | -3.82876100 | -0.28890300 |
| C  | 5.39991500  | -1.26350900 | -1.30789000 |
| H  | 5.62922500  | -0.66867800 | 0.74684800  |
| C  | 4.84459500  | -3.61947700 | -1.64715400 |
| H  | 4.70327100  | -4.82197100 | 0.09553400  |
| C  | 5.66640700  | 0.02387400  | -1.84947700 |
| C  | 5.09670900  | -2.33828600 | -2.20267700 |
| H  | 4.58502900  | -4.43937700 | -2.31163500 |
| C  | 5.63213900  | 0.24123600  | -3.20852800 |
| H  | 5.91022400  | 0.83850000  | -1.17334700 |
| C  | 5.06110100  | -2.08260500 | -3.60112200 |
| C  | 5.32225300  | -0.82181700 | -4.09369600 |
| H  | 5.85271800  | 1.23038300  | -3.59977300 |
| H  | 4.82992300  | -2.90350800 | -4.27613900 |
| H  | 5.30284100  | -0.64109300 | -5.16564100 |
| Cl | 0.06809300  | 1.97501100  | 1.63185100  |
| C  | 6.89072500  | 4.29374600  | -1.49117800 |
| C  | 2.16359500  | 5.80990600  | -2.13609800 |
| C  | -3.85147600 | -5.19559700 | 1.57239200  |
| C  | 0.85847200  | -4.17517800 | 0.22998300  |
| F  | -4.49334800 | -5.07424800 | 2.75318000  |



|   |             |             |             |
|---|-------------|-------------|-------------|
| F | -4.78831400 | -4.97796400 | 0.60556100  |
| F | -3.46157000 | -6.48124000 | 1.44954700  |
| F | 1.53422800  | -4.92882300 | 1.13252300  |
| F | 1.65518600  | -3.16128600 | -0.13746000 |
| F | 0.67861400  | -4.97083400 | -0.85838800 |
| F | 7.16104400  | 3.15931500  | -2.18995700 |
| F | 7.74354900  | 4.31565300  | -0.44673100 |
| F | 7.20467600  | 5.33214100  | -2.29620000 |
| F | 1.02592600  | 6.02385700  | -1.42528300 |
| F | 2.61917300  | 7.01206000  | -2.53662100 |
| F | 1.78250800  | 5.14916000  | -3.26808400 |
| C | -1.56842000 | 2.22064100  | -1.05098900 |
| H | -0.97074900 | 3.08019400  | -0.76998800 |
| H | -2.44341500 | 2.10096800  | -0.41502800 |
| C | -0.88787600 | 1.09208900  | -1.61027000 |
| H | 0.19630700  | 1.11476600  | -1.57413400 |
| C | -1.55077500 | 0.03955800  | -2.17588000 |
| C | -3.04211800 | 0.15628000  | -2.33944100 |
| H | -3.46566100 | -0.71229700 | -2.84358500 |
| H | -3.54779400 | 0.24817900  | -1.37181000 |
| C | -3.38611800 | 1.42523900  | -3.18923000 |
| H | -4.46090100 | 1.39299700  | -3.40357200 |
| H | -2.85890900 | 1.37105700  | -4.14576400 |
| C | -3.11790100 | 2.71210800  | -2.46410700 |
| H | -3.85900000 | 2.96491100  | -1.70969000 |
| C | -2.21547600 | 3.69883500  | -2.81291900 |
| C | -2.28553400 | 5.04920000  | -2.15589900 |
| H | -2.94661700 | 5.05008300  | -1.28542700 |
| H | -2.67521100 | 5.77567400  | -2.88352400 |
| H | -1.29263400 | 5.40643600  | -1.86435100 |
| C | -1.20866900 | 3.54266200  | -3.91517100 |
| H | -0.97761600 | 2.49766400  | -4.13199400 |
| H | -0.28145000 | 4.07343400  | -3.68317300 |
| H | -1.61378600 | 3.99230100  | -4.83316800 |
| C | -0.82927800 | -1.12587900 | -2.72358900 |
| C | -1.45785700 | -2.38504800 | -2.79618300 |
| C | 0.51109500  | -1.03096100 | -3.14714100 |
| C | -0.76904200 | -3.50143000 | -3.25648900 |
| H | -2.47849800 | -2.50755400 | -2.44902800 |
| C | 1.20050600  | -2.14403600 | -3.61298400 |
| H | 1.02197700  | -0.07419300 | -3.12992500 |
| C | 0.56085500  | -3.38465200 | -3.66696900 |
| H | -1.25748500 | -4.46961000 | -3.27557800 |
| H | 2.23610900  | -2.04533200 | -3.91992000 |
| C | 1.27697700  | -4.58914200 | -4.21756800 |
| F | 2.61863700  | -4.49673500 | -4.07046100 |
| F | 1.03995300  | -4.73641700 | -5.54392500 |
| F | 0.87824100  | -5.72979800 | -3.61949400 |

#### TS-S-9:

Imaginary frequency: -201.47 cm<sup>-1</sup>

E[B3LYP/6-31G(d)]: -5531.664891 Hartree

E[PCM(CyH)-B3LYP-D3(BJ)/6-311+G(d,p)]: -5533.622564 Hartree

Free energy correction: 1.301407 Hartree

Free energy correction – Grimme quasi-RRHO: 1.297877 Hartree

Free energy correction – Truhlar quasi-RRHO: 1.306965 Hartree

|   |             |             |             |
|---|-------------|-------------|-------------|
| O | -2.28933900 | -3.14521200 | 0.18514200  |
| C | -3.06791500 | -3.47936000 | -0.71530700 |

|   |             |             |             |
|---|-------------|-------------|-------------|
| C | -2.79605600 | -3.02999200 | -2.17333300 |
| H | -3.64229000 | -3.30155500 | -2.80528000 |
| N | -2.69189900 | -1.57836600 | -2.22648300 |
| C | -3.81026000 | -0.79924400 | -2.13780500 |
| N | -3.53004700 | 0.56049600  | -2.19675900 |
| H | -2.54046600 | 0.81578700  | -2.28357300 |
| C | -1.53287300 | -3.71446300 | -2.79919900 |
| H | -1.78104000 | -1.13996100 | -2.12118600 |
| C | -1.69729100 | -5.24402000 | -2.69400000 |
| H | -0.86744400 | -5.74357700 | -3.20593200 |
| H | -1.69495400 | -5.58465200 | -1.65259800 |
| H | -2.62856400 | -5.58372100 | -3.16480900 |
| C | -1.46325200 | -3.32359600 | -4.29026300 |
| H | -1.39336500 | -2.23899200 | -4.41869900 |
| H | -0.57930900 | -3.77232100 | -4.75557300 |
| H | -2.34971900 | -3.67109100 | -4.83573400 |
| C | -0.22023600 | -3.30320000 | -2.10275600 |
| H | -0.24111100 | -3.53742200 | -1.03687200 |
| H | 0.61846100  | -3.83639700 | -2.56084200 |
| H | -0.01343400 | -2.23110900 | -2.20504000 |
| N | -4.16967500 | -4.24069700 | -0.46493100 |
| C | -5.25486100 | -4.53779300 | -1.42837900 |
| C | -4.47072600 | -4.73357900 | 0.91363900  |
| C | -6.42338200 | -4.98047900 | -0.54018900 |
| H | -5.49492900 | -3.64835300 | -2.01335000 |
| C | -5.72470800 | -5.62178800 | 0.65967400  |
| H | -7.00781000 | -4.11025800 | -0.22481300 |
| H | -6.35457400 | -5.68826400 | 1.55107300  |
| H | -5.39552100 | -6.63719000 | 0.40392900  |
| H | -7.09783600 | -5.66741900 | -1.05987900 |
| H | -4.95207700 | -5.34573900 | -2.10806700 |
| C | -4.40458400 | 1.61335300  | -1.94970200 |
| C | -5.80185600 | 1.47453000  | -1.86382800 |
| C | -3.84063000 | 2.89056000  | -1.77598600 |
| C | -6.58952200 | 2.58731800  | -1.56928500 |
| H | -6.24619900 | 0.50266000  | -2.02580300 |
| C | -4.65020300 | 3.98616100  | -1.48549100 |
| H | -2.76424600 | 3.01103600  | -1.86335600 |
| C | -6.03416900 | 3.85126800  | -1.37124400 |
| H | -6.65946200 | 4.70496100  | -1.14492000 |
| O | 1.92949200  | 3.53347100  | 1.13698400  |
| C | 2.78727200  | 4.14503800  | 0.48433700  |
| C | 2.59966600  | 4.34216500  | -1.04290400 |
| H | 3.53259400  | 4.69599700  | -1.47980000 |
| N | 2.33513300  | 3.05498800  | -1.66467900 |
| C | 3.37177200  | 2.19562100  | -1.91430900 |
| N | 2.96397700  | 0.99885900  | -2.48322800 |
| H | 1.95444500  | 0.86837200  | -2.58429700 |
| C | 1.50604000  | 5.40094900  | -1.41541300 |
| H | 1.38487200  | 2.69065600  | -1.69037000 |
| C | 1.87985300  | 6.75426300  | -0.77783700 |
| H | 1.13983200  | 7.51387500  | -1.05385600 |
| H | 1.90494200  | 6.70080500  | 0.31658800  |
| H | 2.85812800  | 7.10721800  | -1.12614600 |
| C | 1.49701500  | 5.56307200  | -2.94955200 |
| H | 1.21656600  | 4.63283900  | -3.45169900 |
| H | 0.77610600  | 6.33593500  | -3.24065000 |
| H | 2.48305200  | 5.86462100  | -3.32408300 |
| C | 0.09804400  | 4.99855600  | -0.93934200 |
| H | 0.06330300  | 4.90696700  | 0.14889500  |
| H | -0.62967800 | 5.75640000  | -1.24713200 |

|   |             |             |             |
|---|-------------|-------------|-------------|
| H | -0.22699700 | 4.04554500  | -1.37264900 |
| N | 3.91262500  | 4.64812300  | 1.06127100  |
| C | 5.05437400  | 5.24348000  | 0.32089000  |
| C | 4.19838700  | 4.50719900  | 2.52163100  |
| C | 6.16810800  | 5.35661200  | 1.36967300  |
| H | 5.33731400  | 4.60451900  | -0.51875400 |
| C | 5.39753400  | 5.48325200  | 2.68403000  |
| H | 6.77966600  | 4.44907100  | 1.37284000  |
| H | 5.99477600  | 5.24222800  | 3.56760200  |
| H | 5.01198300  | 6.50439100  | 2.80271000  |
| H | 6.82796000  | 6.20687200  | 1.17440500  |
| H | 4.77856800  | 6.23339100  | -0.06198100 |
| C | 3.76452900  | -0.07083700 | -2.88202800 |
| C | 5.16057200  | -0.10273700 | -2.73794800 |
| C | 3.11958100  | -1.17453500 | -3.47304800 |
| C | 5.87328900  | -1.23095200 | -3.14868900 |
| H | 5.66893700  | 0.75483900  | -2.32086000 |
| C | 3.85399300  | -2.27843300 | -3.89279900 |
| H | 2.04313300  | -1.15390000 | -3.60996000 |
| C | 5.24106300  | -2.32664100 | -3.72868300 |
| H | 5.80950600  | -3.18690400 | -4.05838100 |
| C | -3.32650900 | -5.60938500 | 1.45906400  |
| H | -2.47496500 | -5.01126800 | 1.78249900  |
| H | -3.67677000 | -6.21614200 | 2.30083400  |
| H | -2.99513300 | -6.29819200 | 0.67530300  |
| C | 3.01989500  | 4.98070500  | 3.39314200  |
| H | 2.21990500  | 4.24219400  | 3.42348000  |
| H | 3.36367700  | 5.18071200  | 4.41339100  |
| H | 2.61951700  | 5.91751100  | 2.99161900  |
| O | 4.55102600  | 2.48253000  | -1.67255600 |
| O | -4.95133100 | -1.26416200 | -2.02927900 |
| C | -4.83294000 | -3.56947800 | 1.85508100  |
| C | -5.34548000 | -2.38031000 | 1.37198300  |
| C | -4.72214200 | -3.72837900 | 3.26675600  |
| C | -5.77109200 | -1.33926900 | 2.24068200  |
| H | -5.41829800 | -2.20529500 | 0.30262000  |
| C | -5.10312600 | -2.73092600 | 4.13551400  |
| H | -4.32655300 | -4.65248200 | 3.67551200  |
| C | -6.34267400 | -0.13592700 | 1.74279500  |
| C | -5.64298300 | -1.50828100 | 3.65680600  |
| H | -5.00272300 | -2.87774600 | 5.20879500  |
| C | -6.76403900 | 0.85431700  | 2.60287500  |
| H | -6.45998600 | -0.01591900 | 0.66985100  |
| C | -6.07065900 | -0.46161000 | 4.51822300  |
| C | -6.61997800 | 0.69308000  | 4.00417800  |
| H | -7.22112200 | 1.75394100  | 2.20154700  |
| H | -5.97221200 | -0.59455500 | 5.59350000  |
| H | -6.95961100 | 1.47910800  | 4.67387000  |
| C | 4.65284400  | 3.07801500  | 2.87203900  |
| C | 5.02789800  | 2.16611500  | 1.90497600  |
| C | 4.79182400  | 2.70471700  | 4.24098900  |
| C | 5.56410500  | 0.89288100  | 2.24402000  |
| H | 4.93142900  | 2.40593600  | 0.85023800  |
| C | 5.29276300  | 1.47590200  | 4.60294500  |
| H | 4.50600600  | 3.40404700  | 5.02115000  |
| C | 5.99352300  | -0.02622700 | 1.24775800  |
| C | 5.70510400  | 0.53451500  | 3.62268700  |
| H | 5.39208300  | 1.21721400  | 5.65496300  |
| C | 6.54248500  | -1.23952600 | 1.59760500  |
| H | 5.89250300  | 0.24966100  | 0.20208500  |
| C | 6.26554300  | -0.72902000 | 3.95310400  |

|    |             |             |             |
|----|-------------|-------------|-------------|
| C  | 6.67963100  | -1.59465400 | 2.96323400  |
| H  | 6.87807400  | -1.92121900 | 0.82227900  |
| H  | 6.37622500  | -0.99607900 | 5.00186800  |
| H  | 7.11801900  | -2.55379500 | 3.22669700  |
| C  | 7.35878100  | -1.24774900 | -2.90716200 |
| C  | 3.14700600  | -3.46491000 | -4.49097000 |
| C  | -8.07068500 | 2.38643800  | -1.39060500 |
| C  | -3.98957800 | 5.30938500  | -1.21786200 |
| F  | -8.57872100 | 1.51560700  | -2.28553700 |
| F  | -8.35110400 | 1.88210500  | -0.15725100 |
| F  | -8.76183000 | 3.54040300  | -1.50365200 |
| F  | -4.86884000 | 6.32672700  | -1.14561600 |
| F  | -3.07490900 | 5.62483100  | -2.15993500 |
| F  | -3.31651000 | 5.28890500  | -0.02708800 |
| F  | 7.64111400  | -1.35630200 | -1.58082700 |
| F  | 7.95208700  | -0.11092400 | -3.33003100 |
| F  | 7.97112100  | -2.27997200 | -3.52396800 |
| F  | 1.97398300  | -3.12225100 | -5.07137400 |
| F  | 3.89915500  | -4.07887000 | -5.42943700 |
| F  | 2.85767300  | -4.40369200 | -3.55328800 |
| C  | -0.21616600 | 1.22711400  | 1.08617200  |
| H  | 0.23425600  | 2.18807500  | 0.85605700  |
| H  | -1.15424600 | 1.00692300  | 0.59448600  |
| C  | 0.66647700  | 0.14791600  | 1.40170100  |
| H  | 1.73196300  | 0.32906800  | 1.28670900  |
| C  | 0.18249400  | -1.03357500 | 1.89292400  |
| C  | -1.27520000 | -1.06410600 | 2.25297500  |
| H  | -1.58238600 | -2.03105800 | 2.65025500  |
| H  | -1.89179900 | -0.89487000 | 1.36364300  |
| C  | -1.59053200 | 0.03395900  | 3.32593500  |
| H  | -2.67395300 | 0.04574400  | 3.47779600  |
| H  | -1.14518200 | -0.27916600 | 4.27711600  |
| C  | -1.07326600 | 1.42910800  | 3.02483100  |
| H  | -0.13239700 | 1.70268300  | 3.49617600  |
| C  | -1.86114800 | 2.48774800  | 2.61186000  |
| C  | -1.35501800 | 3.89539600  | 2.68158300  |
| H  | -0.28540900 | 3.94730700  | 2.89623300  |
| H  | -1.56213800 | 4.43433200  | 1.75092100  |
| H  | -1.90209100 | 4.42852000  | 3.47380400  |
| C  | -3.25130900 | 2.30111800  | 2.08801800  |
| H  | -3.44838000 | 1.28982800  | 1.72547500  |
| H  | -3.97016000 | 2.48726900  | 2.90001700  |
| H  | -3.47434100 | 3.02163900  | 1.29595400  |
| Cl | -0.32168600 | 1.00432500  | -2.11800700 |
| C  | 1.05336800  | -2.18121200 | 2.19336400  |
| C  | 0.55980200  | -3.49237400 | 2.04038800  |
| C  | 2.38566800  | -2.00679200 | 2.61319200  |
| C  | 1.37584100  | -4.58934700 | 2.29504900  |
| H  | -0.44694600 | -3.64293300 | 1.66360800  |
| C  | 3.19510800  | -3.10434300 | 2.88431900  |
| H  | 2.78778900  | -1.00912200 | 2.75720900  |
| C  | 2.69157200  | -4.39816500 | 2.72620600  |
| H  | 0.99512600  | -5.59486500 | 2.14958000  |
| H  | 4.21734500  | -2.94975100 | 3.21073900  |
| C  | 3.54827800  | -5.58461200 | 3.07856300  |
| F  | 3.22813800  | -6.67300000 | 2.34533600  |
| F  | 4.86159400  | -5.33397300 | 2.88575600  |
| F  | 3.40199900  | -5.93156700 | 4.38018900  |

Imaginary frequency: -62.31 cm<sup>-1</sup>  
 E[B3LYP/6-31G(d)]: -5531.661842 Hartree  
 E[PCM(CyH)-B3LYP-D3(BJ)/6-311+G(d,p)]: -5533.621505 Hartree  
 Free energy correction: 1.301136 Hartree  
 Free energy correction – Grimme quasi-RRHO: 1.297680 Hartree  
 Free energy correction – Truhlar quasi-RRHO: 1.307324 Hartree

|   |             |             |             |
|---|-------------|-------------|-------------|
| O | 3.09632500  | 3.21883500  | 1.22159900  |
| C | 3.27577400  | 4.06227400  | 0.32738500  |
| C | 2.13654600  | 4.37310400  | -0.68343900 |
| H | 2.54992000  | 4.93121700  | -1.52536900 |
| N | 1.60714400  | 3.12817600  | -1.21194700 |
| C | 2.42947000  | 2.30778200  | -1.93245600 |
| N | 1.84469000  | 1.09578700  | -2.27378800 |
| H | 0.88076600  | 0.96512200  | -1.95424000 |
| C | 0.99662900  | 5.26532800  | -0.07850400 |
| H | 0.72901500  | 2.75204200  | -0.85682000 |
| C | 1.59982600  | 6.60277700  | 0.39622300  |
| H | 0.80576200  | 7.25093500  | 0.78330500  |
| H | 2.33301400  | 6.46433400  | 1.19848000  |
| H | 2.08797400  | 7.13925700  | -0.42621600 |
| C | -0.02710200 | 5.56048700  | -1.19552400 |
| H | -0.52082700 | 4.65154400  | -1.55047300 |
| H | -0.80312900 | 6.23764300  | -0.82007900 |
| H | 0.45234400  | 6.04302600  | -2.05600700 |
| C | 0.27558500  | 4.59508300  | 1.10901900  |
| H | 0.97178000  | 4.37513600  | 1.92362700  |
| H | -0.49772000 | 5.27249300  | 1.49069500  |
| H | -0.22489400 | 3.66419800  | 0.82045600  |
| N | 4.44165400  | 4.74951300  | 0.21476900  |
| C | 4.82593400  | 5.57190700  | -0.95956600 |
| C | 5.56292300  | 4.59956900  | 1.19652900  |
| C | 6.33153200  | 5.80244300  | -0.78121400 |
| H | 4.59215600  | 5.03769300  | -1.88329000 |
| C | 6.51259200  | 5.74270300  | 0.73583600  |
| H | 6.89917800  | 5.00226600  | -1.26650700 |
| H | 7.54273500  | 5.55510800  | 1.04877800  |
| H | 6.18388800  | 6.68512100  | 1.19290600  |
| H | 6.65301700  | 6.75361900  | -1.21514400 |
| H | 4.28300100  | 6.52436200  | -0.95114000 |
| C | 2.51120800  | -0.06827800 | -2.66232600 |
| C | 3.85837900  | -0.10120000 | -3.06284900 |
| C | 1.78980500  | -1.27364300 | -2.61262200 |
| C | 4.46043000  | -1.32509100 | -3.35341800 |
| H | 4.41352100  | 0.82307500  | -3.12611400 |
| C | 2.41064800  | -2.48223700 | -2.92079900 |
| H | 0.74875200  | -1.26048100 | -2.30254900 |
| C | 3.75509700  | -2.52732000 | -3.28938800 |
| H | 4.24195100  | -3.47258200 | -3.49299600 |
| O | -6.03605300 | 1.93233900  | -2.27652400 |
| C | -6.53180700 | 2.45298100  | -1.27746000 |
| C | -5.59831100 | 3.15050900  | -0.25467900 |
| H | -6.13015500 | 3.34817400  | 0.67568200  |
| N | -4.51057700 | 2.24095500  | 0.08850600  |
| C | -4.75606400 | 1.18724000  | 0.93501400  |
| N | -3.67981200 | 0.31377700  | 1.02065800  |
| H | -2.85461400 | 0.54564200  | 0.45801600  |
| C | -5.03820500 | 4.52089300  | -0.77044400 |
| H | -3.80444100 | 2.09643700  | -0.62603700 |
| C | -6.21698900 | 5.43196700  | -1.16664000 |

|   |              |             |             |
|---|--------------|-------------|-------------|
| H | -5.84311600  | 6.41928800  | -1.46161300 |
| H | -6.78091100  | 5.02583400  | -2.01291700 |
| H | -6.91175600  | 5.57988200  | -0.33066500 |
| C | -4.26147800  | 5.18810500  | 0.38277000  |
| H | -3.43069700  | 4.55935400  | 0.71732000  |
| H | -3.85227500  | 6.15181700  | 0.05545600  |
| H | -4.91258900  | 5.37697600  | 1.24578000  |
| C | -4.10373600  | 4.35403100  | -1.98655900 |
| H | -4.59634400  | 3.81734700  | -2.80057500 |
| H | -3.79720100  | 5.34229100  | -2.35073500 |
| H | -3.18723000  | 3.80995800  | -1.72908000 |
| N | -7.87489900  | 2.44772500  | -1.02795700 |
| C | -8.50838000  | 2.87094200  | 0.24128200  |
| C | -8.85381500  | 1.85402200  | -1.98746200 |
| C | -9.94826900  | 2.35217300  | 0.13034400  |
| H | -7.97718300  | 2.44553600  | 1.09672900  |
| C | -10.19797800 | 2.34473100  | -1.37899300 |
| H | -10.01539300 | 1.33557800  | 0.53054100  |
| H | -11.03330200 | 1.70705900  | -1.68100400 |
| H | -10.40174500 | 3.36314700  | -1.73523200 |
| H | -10.65454100 | 2.98011800  | 0.68182600  |
| H | -8.49743800  | 3.96552100  | 0.32927900  |
| C | -3.62693600  | -0.90559800 | 1.68438100  |
| C | -4.60092700  | -1.35625500 | 2.59184400  |
| C | -2.50932000  | -1.72424100 | 1.42684300  |
| C | -4.45595800  | -2.60714100 | 3.19518100  |
| H | -5.45504600  | -0.72839900 | 2.80444200  |
| C | -2.37876800  | -2.95669000 | 2.05832600  |
| H | -1.76804500  | -1.38956300 | 0.70767300  |
| C | -3.35286600  | -3.42103500 | 2.94643500  |
| H | -3.25683500  | -4.38845300 | 3.42300700  |
| C | 5.08941200   | 4.86463600  | 2.63674400  |
| H | 4.50156900   | 4.03456000  | 3.02722400  |
| H | 5.94935500   | 5.03430800  | 3.29246700  |
| H | 4.47651800   | 5.77171100  | 2.65954900  |
| C | -8.67088600  | 2.42562400  | -3.40624900 |
| H | -7.78116800  | 2.02153600  | -3.88773300 |
| H | -9.54928800  | 2.20438200  | -4.02122000 |
| H | -8.57697800  | 3.51566800  | -3.34953200 |
| O | -5.80299300  | 1.05808000  | 1.57515900  |
| O | 3.58131800   | 2.63532500  | -2.24254100 |
| C | 6.27964900   | 3.24301700  | 1.04500200  |
| C | 7.14796800   | 2.79090200  | 2.02337200  |
| C | 6.14685400   | 2.47401000  | -0.14563200 |
| C | 7.91097800   | 1.60273400  | 1.86342600  |
| H | 7.28248400   | 3.35095300  | 2.94514500  |
| C | 6.88004600   | 1.32437600  | -0.33743600 |
| H | 5.44021600   | 2.77636200  | -0.91013000 |
| C | 8.80707900   | 1.13488000  | 2.86378500  |
| C | 7.78537300   | 0.85430600  | 0.64895300  |
| H | 6.76625100   | 0.75582200  | -1.25628000 |
| C | 9.54296800   | -0.01276300 | 2.67066700  |
| H | 8.90648300   | 1.70314500  | 3.78613100  |
| C | 8.56160300   | -0.32485100 | 0.47704800  |
| C | 9.42056000   | -0.74977200 | 1.46582700  |
| H | 10.22600000  | -0.35706300 | 3.44255400  |
| H | 8.46661100   | -0.87812900 | -0.45454700 |
| H | 10.01233100  | -1.65009600 | 1.32490400  |
| C | -8.81322800  | 0.31462600  | -1.96593200 |
| C | -8.18137000  | -0.39277100 | -0.96302200 |
| C | -9.52188500  | -0.41813400 | -2.96225700 |

|    |              |             |             |
|----|--------------|-------------|-------------|
| C  | -8.22927200  | -1.81223700 | -0.90176600 |
| H  | -7.61981000  | 0.12658700  | -0.19235100 |
| C  | -9.57719800  | -1.79183900 | -2.93996700 |
| H  | -10.03092400 | 0.11312300  | -3.76069200 |
| C  | -7.60298800  | -2.53856600 | 0.14674300  |
| C  | -8.93909100  | -2.53461600 | -1.91225400 |
| H  | -10.11985700 | -2.32718700 | -3.71618900 |
| C  | -7.67070500  | -3.91307700 | 0.19148100  |
| H  | -7.07284200  | -1.98927800 | 0.91983400  |
| C  | -8.98457600  | -3.95249500 | -1.84425000 |
| C  | -8.36471700  | -4.62742700 | -0.81609500 |
| H  | -7.19358100  | -4.44894500 | 1.00660700  |
| H  | -9.52157500  | -4.49723000 | -2.61783600 |
| H  | -8.40854200  | -5.71264000 | -0.77235200 |
| Cl | -1.02130600  | 1.15862800  | -0.64758800 |
| C  | -5.56220100  | -3.09499800 | 4.09326400  |
| C  | -1.14408500  | -3.77887000 | 1.82338400  |
| C  | 5.93579200   | -1.35391700 | -3.64322500 |
| C  | 1.59882600   | -3.74944600 | -2.85251300 |
| F  | 6.37338800   | -0.21954900 | -4.22498400 |
| F  | 6.66142500   | -1.49061100 | -2.48675000 |
| F  | 6.28848000   | -2.38666300 | -4.43270600 |
| F  | 2.38055100   | -4.85098900 | -2.78781100 |
| F  | 0.79551100   | -3.89345800 | -3.92808300 |
| F  | 0.79647300   | -3.76409600 | -1.75997500 |
| F  | -6.63012300  | -3.52448300 | 3.37545100  |
| F  | -6.01320400  | -2.11980900 | 4.91126800  |
| F  | -5.17050500  | -4.12788800 | 4.87164200  |
| F  | -0.56460500  | -3.51703300 | 0.62785400  |
| F  | -0.18237500  | -3.51883900 | 2.76355200  |
| F  | -1.38288900  | -5.10158600 | 1.88272200  |
| C  | 1.35717000   | 0.50300700  | 1.54618500  |
| H  | 0.27952000   | 0.62771300  | 1.55375400  |
| H  | 1.90284800   | 1.42155800  | 1.33619000  |
| C  | 1.89563300   | -0.75839200 | 1.18848000  |
| H  | 1.20405400   | -1.52313500 | 0.84787500  |
| C  | 3.23761300   | -1.03388700 | 1.29771900  |
| C  | 4.11164500   | -0.03212700 | 1.99534700  |
| H  | 5.14529400   | -0.37420100 | 2.05458700  |
| H  | 4.11082800   | 0.93785100  | 1.48577000  |
| C  | 3.59144700   | 0.19609300  | 3.46444600  |
| H  | 4.36124500   | 0.78012800  | 3.98238600  |
| H  | 3.51770700   | -0.76725400 | 3.97579400  |
| C  | 2.31311900   | 0.97490900  | 3.53146000  |
| H  | 2.42309200   | 2.03756100  | 3.32636400  |
| C  | 1.07931700   | 0.55003200  | 3.97217500  |
| C  | -0.03435400  | 1.54276600  | 4.17522800  |
| H  | 0.21084700   | 2.53038700  | 3.77625200  |
| H  | -0.23618400  | 1.64567600  | 5.25042000  |
| H  | -0.96704200  | 1.19616200  | 3.71553100  |
| C  | 0.77715200   | -0.86283100 | 4.38028000  |
| H  | 1.54470200   | -1.57668400 | 4.07936400  |
| H  | -0.17915400  | -1.19502500 | 3.96447300  |
| H  | 0.67917400   | -0.90688500 | 5.47392800  |
| C  | 3.78582600   | -2.32382200 | 0.84510600  |
| C  | 5.10278700   | -2.39049100 | 0.35004600  |
| C  | 2.99663500   | -3.49200100 | 0.80938100  |
| C  | 5.59472400   | -3.56483400 | -0.20864200 |
| H  | 5.73014400   | -1.50638500 | 0.34416100  |
| C  | 3.49374100   | -4.66921900 | 0.26421900  |
| H  | 1.99620700   | -3.48870800 | 1.22558200  |

|   |            |             |             |
|---|------------|-------------|-------------|
| C | 4.78874500 | -4.70384400 | -0.26010200 |
| H | 6.59652400 | -3.58774500 | -0.62263000 |
| H | 2.87301300 | -5.55764300 | 0.23548700  |
| C | 5.28809900 | -5.93732100 | -0.96442400 |
| F | 4.68437300 | -7.05684800 | -0.51596500 |
| F | 6.62039600 | -6.09864400 | -0.80748500 |
| F | 5.05539100 | -5.86579200 | -2.29747300 |

**TS-S-11:**

Imaginary frequency: -161.53 cm<sup>-1</sup>

E[B3LYP/6-31G(d)]: -5531.659898 Hartree

E[PCM(CyH)-B3LYP-D3(BJ)/6-311+G(d,p)]: -5533.620507 Hartree

Free energy correction: 1.300526 Hartree

Free energy correction – Grimme quasi-RRHO: 1.297582 Hartree

Free energy correction – Truhlar quasi-RRHO: 1.307711 Hartree

|   |             |             |             |
|---|-------------|-------------|-------------|
| O | 3.38339000  | -1.39909400 | 2.15371400  |
| C | 4.21009800  | -0.92107600 | 2.93340100  |
| C | 3.76030800  | 0.19641100  | 3.91027600  |
| H | 4.62521900  | 0.71988500  | 4.31684500  |
| N | 3.00051800  | 1.18881300  | 3.16108900  |
| C | 3.66964400  | 2.06443700  | 2.33838400  |
| N | 2.79964600  | 2.78368200  | 1.52687000  |
| H | 1.81843300  | 2.49652200  | 1.56652800  |
| C | 2.92503800  | -0.34178000 | 5.12462600  |
| H | 2.08438100  | 0.88917800  | 2.83731200  |
| C | 3.74383000  | -1.40722900 | 5.87989700  |
| H | 3.18660400  | -1.75080700 | 6.75907000  |
| H | 3.95200800  | -2.28380400 | 5.25719800  |
| H | 4.69963300  | -1.00388500 | 6.23561600  |
| C | 2.64919100  | 0.83802400  | 6.07870800  |
| H | 2.08893600  | 1.63263200  | 5.57742700  |
| H | 2.06428500  | 0.49820900  | 6.94195100  |
| H | 3.58385700  | 1.27096800  | 6.45682500  |
| C | 1.58471900  | -0.96443800 | 4.68223700  |
| H | 1.73175900  | -1.76588700 | 3.95412900  |
| H | 1.06684800  | -1.37641100 | 5.55699600  |
| H | 0.91619100  | -0.22033500 | 4.23371500  |
| N | 5.51065800  | -1.33306700 | 2.98100800  |
| C | 6.58912800  | -0.64698100 | 3.73014700  |
| C | 6.02443100  | -2.45939200 | 2.14568900  |
| C | 7.87763400  | -1.30909600 | 3.22344700  |
| H | 6.56772000  | 0.42888800  | 3.53567700  |
| C | 7.40913600  | -2.70501000 | 2.80816900  |
| H | 8.26669500  | -0.76672200 | 2.35606400  |
| H | 8.09791900  | -3.21273800 | 2.12750800  |
| H | 7.27474100  | -3.34065900 | 3.69327000  |
| H | 8.65817700  | -1.32573000 | 3.98996000  |
| H | 6.46967600  | -0.81011000 | 4.80847400  |
| C | 3.12885400  | 3.59219600  | 0.44620500  |
| C | 4.40644300  | 4.13288600  | 0.21959800  |
| C | 2.09869200  | 3.88955900  | -0.46205100 |
| C | 4.63022400  | 4.92009400  | -0.91083500 |
| H | 5.20076400  | 3.92423400  | 0.92322800  |
| C | 2.34686500  | 4.67594800  | -1.58229200 |
| H | 1.10839500  | 3.48337600  | -0.27837700 |
| C | 3.61645600  | 5.20057400  | -1.82751000 |
| H | 3.80943600  | 5.80999100  | -2.70042700 |
| O | -4.46304600 | -0.52503800 | 0.79788100  |



|   |             |             |             |
|---|-------------|-------------|-------------|
| C | -4.48186600 | -1.45542600 | 1.61747500  |
| C | -3.46838900 | -1.47153900 | 2.79344100  |
| H | -3.47033500 | -2.45933400 | 3.25463800  |
| N | -2.12344200 | -1.26215400 | 2.28436100  |
| C | -1.52476600 | -2.24701900 | 1.54426300  |
| N | -0.28094700 | -1.88223400 | 1.05117000  |
| H | 0.01495300  | -0.92085400 | 1.23594900  |
| C | -3.81408000 | -0.45030100 | 3.93359500  |
| H | -1.76264600 | -0.31360400 | 2.20348800  |
| C | -5.22540100 | -0.75609200 | 4.47469100  |
| H | -5.46147300 | -0.07672000 | 5.30136900  |
| H | -5.99834800 | -0.62383900 | 3.70947900  |
| H | -5.29711400 | -1.77983000 | 4.86155400  |
| C | -2.79815700 | -0.64997400 | 5.07801500  |
| H | -1.77672600 | -0.42628200 | 4.75794300  |
| H | -3.04309500 | 0.01378900  | 5.91545700  |
| H | -2.81614400 | -1.68167100 | 5.45066700  |
| C | -3.76924100 | 1.01770800  | 3.46494100  |
| H | -4.49664000 | 1.20887700  | 2.67202200  |
| H | -4.00824600 | 1.67398500  | 4.31041400  |
| H | -2.78036900 | 1.31469500  | 3.09857800  |
| N | -5.37734500 | -2.47685100 | 1.53389000  |
| C | -5.31112900 | -3.72826000 | 2.33003800  |
| C | -6.46069800 | -2.51698600 | 0.50476300  |
| C | -6.30497100 | -4.66772400 | 1.63642700  |
| H | -4.29194000 | -4.12123300 | 2.32815900  |
| C | -7.32135400 | -3.70356100 | 1.02446800  |
| H | -5.80187000 | -5.24075800 | 0.85129600  |
| H | -7.92004200 | -4.14600700 | 0.22362600  |
| H | -8.00819200 | -3.33457300 | 1.79733500  |
| H | -6.75367600 | -5.37775100 | 2.33711900  |
| H | -5.61804600 | -3.53630600 | 3.36515300  |
| C | 0.45643400  | -2.56729100 | 0.08203900  |
| C | 0.35534700  | -3.94997200 | -0.13404000 |
| C | 1.34385500  | -1.81685700 | -0.70791100 |
| C | 1.10945400  | -4.54549600 | -1.14781400 |
| H | -0.30537100 | -4.53867800 | 0.48644900  |
| C | 2.07040700  | -2.42794800 | -1.72429200 |
| H | 1.46022700  | -0.75448500 | -0.51807400 |
| C | 1.96230800  | -3.79979500 | -1.95944600 |
| H | 2.53882600  | -4.27306900 | -2.74402600 |
| C | 5.13828900  | -3.71242200 | 2.27648600  |
| H | 4.19580800  | -3.59293300 | 1.74368400  |
| H | 5.66497600  | -4.59072600 | 1.88954200  |
| H | 4.92314000  | -3.89867400 | 3.33439900  |
| C | -7.29877400 | -1.22409800 | 0.50809900  |
| H | -6.78127500 | -0.40419600 | 0.01104400  |
| H | -8.25823800 | -1.39403800 | 0.00900300  |
| H | -7.51494900 | -0.93243200 | 1.54122800  |
| O | -2.04673900 | -3.35205700 | 1.35151400  |
| O | 4.89296000  | 2.21662600  | 2.34658300  |
| C | 6.23065200  | -2.03927700 | 0.67893000  |
| C | 6.19019000  | -0.72069300 | 0.27282900  |
| C | 6.56463800  | -3.03227000 | -0.28805900 |
| C | 6.48076600  | -0.33978400 | -1.06593000 |
| H | 5.92681700  | 0.06453400  | 0.97526400  |
| C | 6.83725400  | -2.69931400 | -1.59367300 |
| H | 6.60694500  | -4.07667400 | 0.00630300  |
| C | 6.46290500  | 1.01959000  | -1.47897100 |
| C | 6.81015600  | -1.34758300 | -2.02602700 |
| H | 7.08335000  | -3.47671400 | -2.31384800 |

|    |             |             |             |
|----|-------------|-------------|-------------|
| C  | 6.75265600  | 1.36472700  | -2.78017700 |
| H  | 6.22097000  | 1.78637400  | -0.74817600 |
| C  | 7.09634400  | -0.96202700 | -3.36222700 |
| C  | 7.06917800  | 0.36425100  | -3.73183500 |
| H  | 6.74130000  | 2.40966800  | -3.07430100 |
| H  | 7.34045200  | -1.73359400 | -4.08925300 |
| H  | 7.29345200  | 0.64897500  | -4.75669700 |
| C  | -5.91221900 | -2.85801600 | -0.89226900 |
| C  | -4.65028100 | -3.38818900 | -1.07919600 |
| C  | -6.75831200 | -2.71032900 | -2.03044900 |
| C  | -4.19037200 | -3.78767600 | -2.36487600 |
| H  | -3.96836800 | -3.50184500 | -0.24122000 |
| C  | -6.33945700 | -3.07460400 | -3.28893800 |
| H  | -7.75823600 | -2.30522000 | -1.90899900 |
| C  | -2.90031400 | -4.35440400 | -2.55439800 |
| C  | -5.04675400 | -3.62400500 | -3.50060100 |
| H  | -7.00459200 | -2.95040600 | -4.14086500 |
| C  | -2.47414600 | -4.73084900 | -3.80958000 |
| H  | -2.25739200 | -4.49616400 | -1.69042900 |
| C  | -4.57610000 | -4.01501100 | -4.78309600 |
| C  | -3.31735900 | -4.55458400 | -4.93472600 |
| H  | -1.49133500 | -5.17477700 | -3.93085900 |
| H  | -5.23053500 | -3.88940600 | -5.64301000 |
| H  | -2.96992800 | -4.85749500 | -5.91897500 |
| Cl | -0.15686500 | 1.38284600  | 1.50236300  |
| C  | 0.94231600  | -6.02067600 | -1.39038300 |
| C  | 2.89116600  | -1.56980100 | -2.64805000 |
| C  | 6.02526000  | 5.43358500  | -1.15222700 |
| C  | 1.20704100  | 4.94216300  | -2.51963000 |
| F  | 6.57896400  | 5.93268100  | -0.02735800 |
| F  | 6.85130800  | 4.44530400  | -1.58317900 |
| F  | 6.05791700  | 6.40708700  | -2.08832000 |
| F  | 1.57713200  | 5.58350000  | -3.64082700 |
| F  | 0.22462800  | 5.67806000  | -1.93869700 |
| F  | 0.59781600  | 3.77715300  | -2.91222200 |
| F  | -0.19725500 | -6.28342700 | -2.09012500 |
| F  | 0.84927800  | -6.71813800 | -0.23933600 |
| F  | 1.96187500  | -6.54333300 | -2.10372400 |
| F  | 3.43272400  | -0.51132700 | -2.02142900 |
| F  | 3.88056100  | -2.26078200 | -3.24659900 |
| F  | 2.11073700  | -1.06508600 | -3.65313500 |
| C  | -1.64688400 | 1.54072300  | -1.14968800 |
| H  | -1.30730900 | 0.54575500  | -0.89345600 |
| H  | -0.84119700 | 2.22174700  | -1.39715500 |
| C  | -2.85931800 | 2.02437000  | -0.56845300 |
| H  | -3.31921000 | 1.39391800  | 0.18610100  |
| C  | -3.45450700 | 3.17057600  | -1.01217300 |
| C  | -2.86298900 | 3.85338300  | -2.21669700 |
| H  | -3.44298200 | 4.73213500  | -2.50469300 |
| H  | -1.83866600 | 4.19173100  | -2.03069600 |
| C  | -2.85099300 | 2.87670800  | -3.44571900 |
| H  | -2.48112600 | 3.44130500  | -4.30913200 |
| H  | -3.88269200 | 2.59158800  | -3.66810000 |
| C  | -1.97181200 | 1.66257700  | -3.28794800 |
| H  | -0.92923500 | 1.81488800  | -3.55961800 |
| C  | -2.38196200 | 0.34674900  | -3.15872900 |
| C  | -1.39678500 | -0.77331800 | -3.32384100 |
| H  | -0.35940700 | -0.43562700 | -3.38097300 |
| H  | -1.63345900 | -1.31268500 | -4.25157100 |
| H  | -1.49423900 | -1.51280900 | -2.52111800 |
| C  | -3.79591600 | -0.06075000 | -2.88284200 |

|   |             |             |             |
|---|-------------|-------------|-------------|
| H | -4.50770500 | 0.76313900  | -2.93867000 |
| H | -3.87710300 | -0.51150500 | -1.88415000 |
| H | -4.09839700 | -0.84116500 | -3.59062700 |
| C | -4.72970800 | 3.64595600  | -0.43831100 |
| C | -5.06989900 | 5.01173500  | -0.47014600 |
| C | -5.63145700 | 2.75075000  | 0.17410400  |
| C | -6.25833800 | 5.47038000  | 0.08967800  |
| H | -4.38492200 | 5.73367600  | -0.90282300 |
| C | -6.82330200 | 3.20738000  | 0.72442100  |
| H | -5.40559200 | 1.68987100  | 0.20995300  |
| C | -7.14255700 | 4.56792600  | 0.68360800  |
| H | -6.49400100 | 6.52912200  | 0.07390600  |
| H | -7.50819700 | 2.50521000  | 1.18828300  |
| C | -8.46325500 | 5.04652400  | 1.22507700  |
| F | -8.87315200 | 4.30236000  | 2.27524700  |
| F | -9.43751100 | 4.97340300  | 0.28763700  |
| F | -8.40420700 | 6.33246700  | 1.63251200  |

### TS-S-12:

Imaginary frequency: -142.72 cm<sup>-1</sup>

E[B3LYP/6-31G(d)]: -5531.663278 Hartree

E[PCM(CyH)-B3LYP-D3(BJ)/6-311+G(d,p)]: -5533.617876 Hartree

Free energy correction: 1.297916 Hartree

Free energy correction – Grimme quasi-RRHO: 1.296354 Hartree

Free energy correction – Truhlar quasi-RRHO: 1.307306 Hartree

|   |             |             |             |
|---|-------------|-------------|-------------|
| O | -2.93223200 | -2.56579100 | -0.67535700 |
| C | -3.69141300 | -2.50534700 | -1.65139900 |
| C | -3.16424700 | -1.93455900 | -2.99219500 |
| H | -3.98266200 | -1.85841600 | -3.70744800 |
| N | -2.68845100 | -0.57268500 | -2.77627100 |
| C | -3.59070800 | 0.44660800  | -2.62496500 |
| N | -2.99589100 | 1.66894700  | -2.34442000 |
| H | -1.97283300 | 1.67524700  | -2.29326000 |
| C | -2.06966700 | -2.83014000 | -3.66290100 |
| H | -1.74603500 | -0.43441500 | -2.42119100 |
| C | -2.63532300 | -4.25530200 | -3.82621100 |
| H | -1.92016600 | -4.88136800 | -4.37123700 |
| H | -2.82183900 | -4.73359100 | -2.85798100 |
| H | -3.57388700 | -4.25410000 | -4.39497900 |
| C | -1.76768000 | -2.24937200 | -5.05979300 |
| H | -1.41082400 | -1.21692100 | -4.99388400 |
| H | -0.99179100 | -2.84173200 | -5.55581500 |
| H | -2.66160800 | -2.25657000 | -5.69608500 |
| C | -0.76315700 | -2.89951300 | -2.84775000 |
| H | -0.93644500 | -3.30015100 | -1.84717400 |
| H | -0.04353000 | -3.54409900 | -3.36153000 |
| H | -0.29150800 | -1.91562500 | -2.73752700 |
| N | -4.98884300 | -2.90527200 | -1.57287800 |
| C | -6.00920800 | -2.75745500 | -2.63707100 |
| C | -5.56238900 | -3.41987600 | -0.28868200 |
| C | -7.34213800 | -2.89014000 | -1.89216000 |
| H | -5.90836200 | -1.78772300 | -3.12595300 |
| C | -7.00155800 | -3.82386400 | -0.72965300 |
| H | -7.66597100 | -1.91251700 | -1.52140800 |
| H | -7.70428400 | -3.76131400 | 0.10526000  |
| H | -6.98570300 | -4.86430400 | -1.07874600 |
| H | -8.13453300 | -3.28227600 | -2.53662600 |
| H | -5.89608900 | -3.55463500 | -3.38421600 |

|   |             |             |             |
|---|-------------|-------------|-------------|
| C | -3.62913400 | 2.83275200  | -1.91351400 |
| C | -5.00734300 | 2.92721600  | -1.65390800 |
| C | -2.82310900 | 3.96630700  | -1.69869700 |
| C | -5.53623900 | 4.11400700  | -1.14733800 |
| H | -5.64325200 | 2.07723600  | -1.85561900 |
| C | -3.37763400 | 5.14490900  | -1.20569700 |
| H | -1.76128300 | 3.91334100  | -1.91887000 |
| C | -4.74000600 | 5.23416600  | -0.91482500 |
| H | -5.16796600 | 6.15147900  | -0.53175500 |
| O | 2.90548100  | 3.22734700  | 1.49575700  |
| C | 3.89727300  | 3.57740900  | 0.83873100  |
| C | 3.74500200  | 3.90190500  | -0.66588600 |
| H | 4.72764800  | 4.06926700  | -1.10328800 |
| N | 3.20394900  | 2.73673800  | -1.35130300 |
| C | 4.04657900  | 1.72464300  | -1.73591400 |
| N | 3.39023800  | 0.65614500  | -2.32534100 |
| H | 2.37008400  | 0.71612400  | -2.36499700 |
| C | 2.91360900  | 5.19765800  | -0.95208600 |
| H | 2.20655300  | 2.54174500  | -1.29222200 |
| C | 3.53402700  | 6.36585200  | -0.15962800 |
| H | 3.02023200  | 7.30153200  | -0.40726500 |
| H | 3.44461800  | 6.21769900  | 0.92259400  |
| H | 4.59613900  | 6.49887700  | -0.40137200 |
| C | 3.01957900  | 5.50370400  | -2.46014500 |
| H | 2.61326600  | 4.68563000  | -3.06243700 |
| H | 2.45838400  | 6.41398900  | -2.70090900 |
| H | 4.06202600  | 5.66120900  | -2.76375100 |
| C | 1.42862500  | 5.06086400  | -0.56890900 |
| H | 1.30944300  | 4.85553700  | 0.49719900  |
| H | 0.89556700  | 5.98790500  | -0.80417600 |
| H | 0.93645500  | 4.25689400  | -1.12826900 |
| N | 5.13538700  | 3.65574400  | 1.39636400  |
| C | 6.40112300  | 3.91683400  | 0.66742200  |
| C | 5.35955200  | 3.33768200  | 2.84089500  |
| C | 7.48607500  | 3.41882600  | 1.62752100  |
| H | 6.41063500  | 3.37789400  | -0.28100100 |
| C | 6.87268600  | 3.67206600  | 3.00521000  |
| H | 7.66454500  | 2.34963300  | 1.47346400  |
| H | 7.32608300  | 3.08111400  | 3.80523200  |
| H | 6.97423200  | 4.73209200  | 3.27079800  |
| H | 8.43586700  | 3.94095700  | 1.47936900  |
| H | 6.51208500  | 4.99247800  | 0.47533300  |
| C | 3.96840200  | -0.46424700 | -2.92620800 |
| C | 5.33434300  | -0.78262700 | -2.83770600 |
| C | 3.12025700  | -1.31498100 | -3.65791300 |
| C | 5.82041500  | -1.92472600 | -3.47418100 |
| H | 5.99502600  | -0.13265900 | -2.28329800 |
| C | 3.62922000  | -2.44871800 | -4.28560700 |
| H | 2.06510100  | -1.07500900 | -3.74279100 |
| C | 4.98516500  | -2.76916200 | -4.20272000 |
| H | 5.37818000  | -3.64909500 | -4.69630500 |
| C | -4.81198700 | -4.67179700 | 0.20162000  |
| H | -3.84685300 | -4.41854000 | 0.63941500  |
| H | -5.41225800 | -5.20843300 | 0.94409300  |
| H | -4.65169900 | -5.35037400 | -0.64261900 |
| C | 4.52784800  | 4.25933200  | 3.75193600  |
| H | 3.47381900  | 3.98308500  | 3.75006300  |
| H | 4.90740600  | 4.22593700  | 4.77860300  |
| H | 4.62227400  | 5.29246700  | 3.40207000  |
| O | 5.27300300  | 1.78292100  | -1.58709800 |
| O | -4.81013000 | 0.28975400  | -2.75152800 |

|   |             |             |             |
|---|-------------|-------------|-------------|
| C | -5.62355500 | -2.30494100 | 0.77374200  |
| C | -5.63001000 | -2.60151700 | 2.12386000  |
| C | -5.76634100 | -0.94111200 | 0.38512200  |
| C | -5.77883000 | -1.59492300 | 3.11611900  |
| H | -5.52220000 | -3.62691700 | 2.46537600  |
| C | -5.92750200 | 0.05738100  | 1.31858900  |
| H | -5.72507200 | -0.67391000 | -0.66522200 |
| C | -5.77835800 | -1.89676600 | 4.50554700  |
| C | -5.94161700 | -0.23241400 | 2.70836600  |
| H | -6.05912100 | 1.08760600  | 0.99477900  |
| C | -5.93546000 | -0.90159600 | 5.44439200  |
| H | -5.65547200 | -2.93200700 | 4.81642900  |
| C | -6.10501200 | 0.77158800  | 3.70049400  |
| C | -6.10228200 | 0.44607600  | 5.03850600  |
| H | -5.93666800 | -1.14756100 | 6.50304800  |
| H | -6.23825500 | 1.80291000  | 3.38144700  |
| H | -6.23220600 | 1.22116100  | 5.78914300  |
| C | 5.11491900  | 1.84282400  | 3.12235100  |
| C | 4.83870700  | 1.39656300  | 4.40169500  |
| C | 5.25140100  | 0.87270100  | 2.08735800  |
| C | 4.69470600  | 0.01625000  | 4.70539200  |
| H | 4.72861700  | 2.10204600  | 5.22021500  |
| C | 5.12264100  | -0.47262300 | 2.34748600  |
| H | 5.44465400  | 1.19338900  | 1.06882100  |
| C | 4.41021400  | -0.44311600 | 6.02072800  |
| C | 4.84447700  | -0.94692400 | 3.65656800  |
| H | 5.23350900  | -1.19123700 | 1.53874500  |
| C | 4.28236300  | -1.78779600 | 6.28765300  |
| H | 4.29920000  | 0.28840800  | 6.81808000  |
| C | 4.70803900  | -2.32872700 | 3.96306300  |
| C | 4.43418100  | -2.74101900 | 5.24926300  |
| H | 4.06992100  | -2.12468400 | 7.29865600  |
| H | 4.83427700  | -3.05671700 | 3.16489500  |
| H | 4.34578500  | -3.80043200 | 5.47545000  |
| C | 7.29903900  | -2.20798900 | -3.41749900 |
| C | 2.69919600  | -3.37012700 | -5.02760900 |
| C | -6.99434400 | 4.13303700  | -0.77400700 |
| C | -2.47269500 | 6.31345000  | -0.92504000 |
| F | -7.76472900 | 3.52056400  | -1.69613000 |
| F | -7.20391900 | 3.47942600  | 0.40192700  |
| F | -7.46843600 | 5.38621300  | -0.61161400 |
| F | -3.14458100 | 7.48096100  | -0.86638900 |
| F | -1.50634700 | 6.44484900  | -1.86102900 |
| F | -1.83018500 | 6.17474000  | 0.26918800  |
| F | 7.83519300  | -1.85332800 | -2.22805000 |
| F | 7.97586500  | -1.52571200 | -4.37009700 |
| F | 7.56987500  | -3.51940800 | -3.60678500 |
| F | 1.63893400  | -2.71027900 | -5.54938900 |
| F | 3.32022800  | -4.00556400 | -6.04390700 |
| F | 2.19434300  | -4.33612300 | -4.21737600 |
| C | 1.11622900  | 0.60297400  | 1.80582700  |
| H | 1.90559400  | 1.27002400  | 2.14234700  |
| H | 0.61044700  | 0.91781100  | 0.89776700  |
| C | 1.16116000  | -0.76984900 | 2.12946600  |
| H | 2.03913200  | -1.14162300 | 2.65076300  |
| C | 0.08228700  | -1.59144000 | 1.86816100  |
| C | -1.17540600 | -0.92123200 | 1.41502000  |
| H | -1.97450000 | -1.62050100 | 1.17901000  |
| H | -0.98709000 | -0.33278700 | 0.50867300  |
| C | -1.70418000 | 0.05754100  | 2.53426500  |
| H | -2.59141500 | 0.54619400  | 2.12153700  |

|    |             |             |             |
|----|-------------|-------------|-------------|
| H  | -2.04785100 | -0.54777400 | 3.37942900  |
| C  | -0.71920300 | 1.07476100  | 3.05055500  |
| H  | -0.22343100 | 0.82669300  | 3.98615700  |
| C  | -0.62337700 | 2.39331800  | 2.65487400  |
| C  | 0.22894400  | 3.35768800  | 3.42205200  |
| H  | 0.68403500  | 2.90042500  | 4.30532900  |
| H  | 1.02777900  | 3.74819100  | 2.77882300  |
| H  | -0.38096900 | 4.21358700  | 3.73992900  |
| C  | -1.30304900 | 2.92826600  | 1.43290500  |
| H  | -2.24898900 | 2.42484200  | 1.21870900  |
| H  | -1.48073600 | 4.00370300  | 1.51005100  |
| H  | -0.65963600 | 2.77378500  | 0.55310100  |
| Cl | 0.16776800  | 1.18478800  | -1.69709300 |
| C  | 0.11027600  | -3.03131200 | 2.16542900  |
| C  | -0.73644900 | -3.91443900 | 1.46331000  |
| C  | 0.98867400  | -3.57047900 | 3.12972000  |
| C  | -0.68817100 | -5.28425700 | 1.70462200  |
| H  | -1.41381500 | -3.53576400 | 0.70468000  |
| C  | 1.02171800  | -4.93591700 | 3.38002300  |
| H  | 1.63057400  | -2.91922700 | 3.71316500  |
| C  | 0.18532800  | -5.79894300 | 2.66475000  |
| H  | -1.33761900 | -5.95297600 | 1.14982500  |
| H  | 1.68633100  | -5.33271700 | 4.14021000  |
| C  | 0.26695500  | -7.28496800 | 2.89765400  |
| F  | -0.90021400 | -7.90283300 | 2.61699100  |
| F  | 1.21528800  | -7.85536200 | 2.12077600  |
| F  | 0.58317700  | -7.57230800 | 4.18008300  |

### TS-S-13:

Imaginary frequency: -206.05 cm<sup>-1</sup>

E[B3LYP/6-31G(d)]: -5531.655169 Hartree

E[PCM(CyH)-B3LYP-D3(BJ)/6-311+G(d,p)]: -5533.617944 Hartree

Free energy correction: 1.299822 Hartree

Free energy correction – Grimme quasi-RRHO: 1.297230 Hartree

Free energy correction – Truhlar quasi-RRHO: 1.307645 Hartree

|   |            |             |             |
|---|------------|-------------|-------------|
| O | 3.95702200 | 2.54680500  | -0.05574900 |
| C | 4.94765000 | 2.27691600  | -0.73995700 |
| C | 4.75184700 | 1.79787700  | -2.20038300 |
| H | 5.69529100 | 1.43236000  | -2.60381300 |
| N | 3.84472000 | 0.65827300  | -2.22111000 |
| C | 4.31276200 | -0.59145600 | -1.88892600 |
| N | 3.31377100 | -1.55106100 | -1.88631800 |
| H | 2.37045100 | -1.22394000 | -2.10687500 |
| C | 4.25810900 | 2.93455200  | -3.16048000 |
| H | 2.85717500 | 0.84227600  | -2.07312800 |
| C | 5.22314500 | 4.13253400  | -3.05732800 |
| H | 4.94163500 | 4.90374900  | -3.78375900 |
| H | 5.19960100 | 4.59112800  | -2.06292000 |
| H | 6.25725100 | 3.83792100  | -3.27515200 |
| C | 4.29137200 | 2.39029900  | -4.60301700 |
| H | 3.64608400 | 1.51342800  | -4.71179400 |
| H | 3.94666400 | 3.15830900  | -5.30608800 |
| H | 5.30789300 | 2.09998200  | -4.89677400 |
| C | 2.82955800 | 3.41241400  | -2.82987000 |
| H | 2.75301500 | 3.75731400  | -1.79634900 |
| H | 2.55812500 | 4.23988400  | -3.49733200 |
| H | 2.08590400 | 2.62094700  | -2.98023300 |
| N | 6.22208300 | 2.38278500  | -0.26362500 |

|   |             |             |             |
|---|-------------|-------------|-------------|
| C | 7.43946100  | 1.90886500  | -0.96369200 |
| C | 6.51053300  | 2.87174100  | 1.11830500  |
| C | 8.52164000  | 1.92009600  | 0.12305200  |
| H | 7.27755200  | 0.91197600  | -1.37992300 |
| C | 8.05666500  | 3.03323900  | 1.06319000  |
| H | 8.53884900  | 0.96022100  | 0.64886100  |
| H | 8.50170300  | 2.97929900  | 2.06055600  |
| H | 8.29882600  | 4.01545500  | 0.63635400  |
| H | 9.51854900  | 2.09522800  | -0.29238900 |
| H | 7.70218900  | 2.59601000  | -1.77924200 |
| C | 3.40924300  | -2.89131900 | -1.51818400 |
| C | 4.59388000  | -3.51284200 | -1.09091200 |
| C | 2.23043100  | -3.65536900 | -1.58563100 |
| C | 4.56699000  | -4.85523900 | -0.70877200 |
| H | 5.51344200  | -2.94474500 | -1.07197500 |
| C | 2.23095500  | -4.99531300 | -1.21358600 |
| H | 1.31658700  | -3.18804200 | -1.93826100 |
| C | 3.39819800  | -5.61302800 | -0.76107300 |
| H | 3.39805500  | -6.65580900 | -0.47176700 |
| O | -2.47864500 | 2.14199700  | 1.14784700  |
| C | -2.03328100 | 1.69526300  | 2.21613600  |
| C | -0.66680200 | 0.95955500  | 2.23852700  |
| H | -0.57366700 | 0.39911700  | 3.16970000  |
| N | -0.63669700 | -0.01546100 | 1.16169200  |
| C | -1.42865200 | -1.12386900 | 1.22078900  |
| N | -1.32076300 | -1.92816700 | 0.09034800  |
| H | -0.71747000 | -1.56889400 | -0.65602400 |
| C | 0.57756500  | 1.91361000  | 2.16519800  |
| H | -0.18521100 | 0.22174400  | 0.28209600  |
| C | 0.55906200  | 2.86246900  | 3.38024500  |
| H | 1.43675500  | 3.51701200  | 3.34843900  |
| H | -0.33095200 | 3.50260300  | 3.39402300  |
| H | 0.59964700  | 2.30772900  | 4.32551900  |
| C | 1.85213600  | 1.04646900  | 2.24314400  |
| H | 1.93520700  | 0.36390000  | 1.39311700  |
| H | 2.74195700  | 1.68195000  | 2.22832700  |
| H | 1.86820300  | 0.44612600  | 3.16115900  |
| C | 0.60998600  | 2.75958700  | 0.87741100  |
| H | -0.24304000 | 3.44223900  | 0.82266900  |
| H | 1.53375200  | 3.34539200  | 0.85480600  |
| H | 0.61521200  | 2.14569500  | -0.02978400 |
| N | -2.70759400 | 1.83172000  | 3.39006000  |
| C | -2.36199400 | 1.13064000  | 4.65182700  |
| C | -3.99041800 | 2.59141800  | 3.49591600  |
| C | -3.58952100 | 1.34020700  | 5.54750500  |
| H | -2.16576700 | 0.07386100  | 4.45518900  |
| C | -4.16837500 | 2.66095100  | 5.03927400  |
| H | -4.30879900 | 0.52798900  | 5.40308300  |
| H | -5.21454800 | 2.81713200  | 5.31641400  |
| H | -3.58488700 | 3.50594200  | 5.42727900  |
| H | -3.32172300 | 1.36834900  | 6.60762000  |
| H | -1.46922400 | 1.57880900  | 5.10257400  |
| C | -2.15157700 | -2.99128000 | -0.26113400 |
| C | -2.94379400 | -3.69737100 | 0.66192700  |
| C | -2.19906800 | -3.35611600 | -1.61530700 |
| C | -3.79047000 | -4.70725100 | 0.21014300  |
| H | -2.89759200 | -3.43302400 | 1.70787900  |
| C | -3.04754300 | -4.37536200 | -2.04184100 |
| H | -1.57817700 | -2.82854000 | -2.33404900 |
| C | -3.86112100 | -5.05779800 | -1.14025400 |
| H | -4.53332900 | -5.83631500 | -1.47954000 |

|    |             |             |             |
|----|-------------|-------------|-------------|
| C  | 5.84887000  | 4.23744600  | 1.38371600  |
| H  | 4.77299400  | 4.14182100  | 1.52471000  |
| H  | 6.29070900  | 4.70911100  | 2.26758400  |
| H  | 6.03362200  | 4.90092800  | 0.53195500  |
| C  | -3.86043100 | 4.01508000  | 2.92161700  |
| H  | -3.88278900 | 4.01639700  | 1.83230500  |
| H  | -4.67040300 | 4.64933700  | 3.29641400  |
| H  | -2.91629400 | 4.45756200  | 3.25576600  |
| O  | -2.16126700 | -1.37956700 | 2.18366400  |
| O  | 5.50233600  | -0.82851900 | -1.65775300 |
| C  | 6.14206500  | 1.81827900  | 2.17973300  |
| C  | 5.92836600  | 0.49279400  | 1.85580700  |
| C  | 6.10611000  | 2.18808600  | 3.55596300  |
| C  | 5.68518100  | -0.49338300 | 2.85043800  |
| H  | 5.93543600  | 0.17118300  | 0.81861800  |
| C  | 5.86183700  | 1.26107200  | 4.54238700  |
| H  | 6.27597200  | 3.22213600  | 3.84008900  |
| C  | 5.49408500  | -1.86175200 | 2.51749600  |
| C  | 5.64729800  | -0.10646100 | 4.22754400  |
| H  | 5.83675100  | 1.57055000  | 5.58519100  |
| C  | 5.27262600  | -2.80222500 | 3.49828700  |
| H  | 5.53263100  | -2.15810500 | 1.47306100  |
| C  | 5.40798200  | -1.09771700 | 5.21636400  |
| C  | 5.22507200  | -2.41572900 | 4.86063700  |
| H  | 5.14058200  | -3.84434000 | 3.22323900  |
| H  | 5.37755900  | -0.79849900 | 6.26196100  |
| H  | 5.04741300  | -3.16677800 | 5.62603900  |
| C  | -5.16703900 | 1.81234200  | 2.88005200  |
| C  | -5.08729800 | 0.46125600  | 2.60285000  |
| C  | -6.41285500 | 2.47213900  | 2.66630300  |
| C  | -6.20873800 | -0.27183600 | 2.12523900  |
| H  | -4.15142700 | -0.07487600 | 2.72904100  |
| C  | -7.51214300 | 1.79554700  | 2.18976900  |
| H  | -6.50515300 | 3.53172400  | 2.88437300  |
| C  | -6.13180800 | -1.66775800 | 1.86599900  |
| C  | -7.45046600 | 0.40520100  | 1.90432900  |
| H  | -8.45044200 | 2.32378700  | 2.03419100  |
| C  | -7.22764600 | -2.36002300 | 1.39822700  |
| H  | -5.19381700 | -2.18165800 | 2.05249400  |
| C  | -8.56177300 | -0.33427300 | 1.41637600  |
| C  | -8.45253900 | -1.68515100 | 1.16696200  |
| H  | -7.15213300 | -3.42688600 | 1.20965500  |
| H  | -9.50449400 | 0.18290400  | 1.25100800  |
| H  | -9.31098700 | -2.24181100 | 0.80038900  |
| Cl | 0.32536800  | -0.21805000 | -2.15740700 |
| C  | -4.64023300 | -5.46164300 | 1.19828600  |
| C  | -3.15433700 | -4.63622800 | -3.51814000 |
| C  | 5.83659600  | -5.46250900 | -0.17510600 |
| C  | 0.93246200  | -5.75624300 | -1.25446000 |
| F  | 6.91095700  | -5.12821100 | -0.92155100 |
| F  | 6.09681300  | -5.03199000 | 1.08797100  |
| F  | 5.78107200  | -6.81087100 | -0.12431100 |
| F  | 1.12371600  | -7.09258300 | -1.26132600 |
| F  | 0.20237500  | -5.44567500 | -2.35281300 |
| F  | 0.15294300  | -5.47303700 | -0.18274100 |
| F  | -5.88837900 | -5.68193200 | 0.70612100  |
| F  | -4.79035100 | -4.78966000 | 2.36214200  |
| F  | -4.12507600 | -6.67141500 | 1.49852300  |
| F  | -1.95128200 | -4.64833800 | -4.12380200 |
| F  | -3.77084000 | -5.80089700 | -3.79663900 |
| F  | -3.88135200 | -3.65129200 | -4.12776800 |



|   |             |             |             |
|---|-------------|-------------|-------------|
| C | -2.47497800 | 0.77840100  | -2.46602300 |
| H | -2.50258800 | 0.01148200  | -1.70209300 |
| H | -2.13525700 | 0.41140900  | -3.42702700 |
| C | -2.20223200 | 2.12592700  | -2.06565900 |
| H | -1.92867900 | 2.27436500  | -1.02562700 |
| C | -2.37308600 | 3.16886300  | -2.92762100 |
| C | -2.98048900 | 2.86641500  | -4.27285000 |
| H | -3.10553800 | 3.76790900  | -4.87521400 |
| H | -2.35077800 | 2.17622900  | -4.84860200 |
| C | -4.39395600 | 2.21914100  | -4.07838800 |
| H | -4.85233700 | 2.10189400  | -5.06744800 |
| H | -5.01849300 | 2.92211000  | -3.52073900 |
| C | -4.37939100 | 0.86098500  | -3.41956200 |
| H | -4.21925000 | 0.02672400  | -4.10126800 |
| C | -4.90999600 | 0.52420700  | -2.18378000 |
| C | -5.13285100 | -0.91645900 | -1.83286200 |
| H | -4.70869800 | -1.60741300 | -2.56564600 |
| H | -6.21564400 | -1.09582100 | -1.77418300 |
| H | -4.74239400 | -1.15197700 | -0.83656900 |
| C | -5.29025900 | 1.52409400  | -1.13828600 |
| H | -5.32678000 | 2.54988900  | -1.50653800 |
| H | -4.57374700 | 1.48990100  | -0.30435900 |
| H | -6.26362100 | 1.26144000  | -0.70889000 |
| C | -2.13577000 | 4.56469500  | -2.50920900 |
| C | -1.80230200 | 5.55582800  | -3.45153000 |
| C | -2.22571900 | 4.94136100  | -1.15280300 |
| C | -1.55792900 | 6.86832100  | -3.05941700 |
| H | -1.69998400 | 5.29825800  | -4.50078100 |
| C | -1.99080400 | 6.25411800  | -0.76190100 |
| H | -2.49792300 | 4.20681000  | -0.40173000 |
| C | -1.65667200 | 7.22307100  | -1.71288100 |
| H | -1.29562900 | 7.61715700  | -3.79910900 |
| H | -2.08059800 | 6.53118500  | 0.28322700  |
| C | -1.35335000 | 8.63199700  | -1.27644200 |
| F | -0.05374900 | 8.77681400  | -0.93335700 |
| F | -2.08738700 | 8.98954600  | -0.19957100 |
| F | -1.60553200 | 9.52648700  | -2.25728400 |

#### TS-S-14:

Imaginary frequency: -168.95 cm<sup>-1</sup>

E[B3LYP/6-31G(d)]: -5531.659354 Hartree

E[PCM(CyH)-B3LYP-D3(BJ)/6-311+G(d,p)]: -5533.611580 Hartree

Free energy correction: 1.298530 Hartree

Free energy correction – Grimme quasi-RRHO: 1.296578 Hartree

Free energy correction – Truhlar quasi-RRHO: 1.307786 Hartree

|   |             |            |             |
|---|-------------|------------|-------------|
| O | -4.63226500 | 1.00769400 | -3.22242300 |
| C | -5.29674900 | 1.98721300 | -2.88138400 |
| C | -4.56286300 | 3.22075700 | -2.29812100 |
| H | -5.26956800 | 3.89877400 | -1.82131300 |
| N | -3.66443200 | 2.77032200 | -1.24041300 |
| C | -4.18157300 | 2.47047900 | 0.00013800  |
| N | -3.23863000 | 1.89372600 | 0.83701300  |
| H | -2.30273400 | 1.74846200 | 0.44781000  |
| C | -3.78361200 | 4.04480200 | -3.38060100 |
| H | -2.87929900 | 2.20534600 | -1.54759000 |
| C | -4.75122300 | 4.43331500 | -4.51599500 |
| H | -4.23716100 | 5.07333200 | -5.24244700 |
| H | -5.12404100 | 3.55531100 | -5.05423300 |

|   |             |             |             |
|---|-------------|-------------|-------------|
| H | -5.61379300 | 4.99499600  | -4.13667100 |
| C | -3.25315100 | 5.33057100  | -2.71523300 |
| H | -2.59283400 | 5.09771900  | -1.87443800 |
| H | -2.68677400 | 5.92764800  | -3.44016500 |
| H | -4.07472600 | 5.95271100  | -2.33831700 |
| C | -2.60074300 | 3.25524000  | -3.97862500 |
| H | -2.92556500 | 2.29730400  | -4.39180600 |
| H | -2.13386600 | 3.84386100  | -4.77777000 |
| H | -1.82334300 | 3.05848700  | -3.23068200 |
| N | -6.65710100 | 2.03442400  | -2.98938000 |
| C | -7.52087800 | 3.09530600  | -2.42241300 |
| C | -7.44323400 | 0.90822200  | -3.57655600 |
| C | -8.93751700 | 2.51307600  | -2.51644600 |
| H | -7.23067700 | 3.31893300  | -1.39255100 |
| C | -8.84482800 | 1.56695900  | -3.71506600 |
| H | -9.17631900 | 1.95160100  | -1.60770300 |
| H | -9.64074900 | 0.81772100  | -3.74356700 |
| H | -8.88107000 | 2.13714300  | -4.65269200 |
| H | -9.69435900 | 3.29351300  | -2.64009100 |
| H | -7.43925400 | 4.01422400  | -3.01788100 |
| C | -3.43362800 | 1.36704800  | 2.10821900  |
| C | -4.61924900 | 1.49069000  | 2.85267900  |
| C | -2.35144600 | 0.66923800  | 2.67259900  |
| C | -4.70396500 | 0.89919300  | 4.11469000  |
| H | -5.45110600 | 2.04153500  | 2.43586400  |
| C | -2.45447900 | 0.10570200  | 3.93901400  |
| H | -1.44132700 | 0.56885900  | 2.09017800  |
| C | -3.63394700 | 0.20566100  | 4.67943400  |
| H | -3.71808500 | -0.24315800 | 5.66065200  |
| O | 4.47102100  | 0.76529900  | -1.14688900 |
| C | 4.48211700  | 0.44218900  | -2.34382200 |
| C | 3.20934100  | 0.64474600  | -3.21060300 |
| H | 3.30833800  | 0.07325300  | -4.13425300 |
| N | 2.05748300  | 0.10346500  | -2.51083200 |
| C | 1.94344000  | -1.24729100 | -2.33805600 |
| N | 0.84635100  | -1.60635400 | -1.56481800 |
| H | 0.29817600  | -0.83349000 | -1.17289600 |
| C | 2.96696400  | 2.13610500  | -3.63446300 |
| H | 1.48501400  | 0.71610800  | -1.93284800 |
| C | 4.17366800  | 2.62869400  | -4.45861300 |
| H | 4.00591900  | 3.66225200  | -4.78138100 |
| H | 5.10394200  | 2.61130900  | -3.87986000 |
| H | 4.31956100  | 2.02356000  | -5.36151400 |
| C | 1.71152000  | 2.18235800  | -4.53140700 |
| H | 0.80999300  | 1.88409600  | -3.98886600 |
| H | 1.55769700  | 3.20174800  | -4.90420600 |
| H | 1.81710800  | 1.51972400  | -5.39916500 |
| C | 2.76755600  | 3.08039300  | -2.43210200 |
| H | 3.65134100  | 3.10526800  | -1.78924700 |
| H | 2.58577100  | 4.09775800  | -2.79876600 |
| H | 1.90552400  | 2.80277700  | -1.81563100 |
| N | 5.58520800  | -0.08364000 | -2.94299900 |
| C | 5.60046000  | -0.70793300 | -4.28979700 |
| C | 6.89171100  | -0.23661700 | -2.23313800 |
| C | 6.95385200  | -1.42664900 | -4.35670200 |
| H | 4.75697400  | -1.39424700 | -4.39662200 |
| C | 7.83201400  | -0.59930000 | -3.41749100 |
| H | 6.85883700  | -2.45173700 | -3.98527800 |
| H | 8.72572900  | -1.12725500 | -3.07389700 |
| H | 8.15394800  | 0.32550200  | -3.91371700 |
| H | 7.34177000  | -1.47294500 | -5.37833600 |

|    |             |             |             |
|----|-------------|-------------|-------------|
| H  | 5.53205500  | 0.06293800  | -5.06618100 |
| C  | 0.56412900  | -2.87836200 | -1.06508100 |
| C  | 1.01199100  | -4.06429200 | -1.66823000 |
| C  | -0.22017200 | -2.96175300 | 0.09918000  |
| C  | 0.69775100  | -5.29469200 | -1.08809400 |
| H  | 1.59759700  | -4.01053000 | -2.57525700 |
| C  | -0.51343700 | -4.19907000 | 0.66445600  |
| H  | -0.58909500 | -2.05192700 | 0.56313800  |
| C  | -0.05716600 | -5.38218700 | 0.08020300  |
| H  | -0.29307500 | -6.34309500 | 0.51919600  |
| C  | -6.90536300 | 0.50498400  | -4.96256700 |
| H  | -5.96692700 | -0.04235800 | -4.88294100 |
| H  | -7.64136500 | -0.10944300 | -5.49137800 |
| H  | -6.73818900 | 1.40570800  | -5.56334500 |
| C  | 7.34805000  | 1.08576300  | -1.58819700 |
| H  | 6.79522100  | 1.30240900  | -0.67469000 |
| H  | 8.41755900  | 1.04521800  | -1.35804100 |
| H  | 7.19665800  | 1.90782600  | -2.29558200 |
| O  | 2.73963300  | -2.05856800 | -2.82625100 |
| O  | -5.34090600 | 2.72401500  | 0.33571000  |
| C  | -7.53172500 | -0.28782600 | -2.61027500 |
| C  | -7.19772500 | -0.18294100 | -1.27496300 |
| C  | -8.05693400 | -1.52816300 | -3.07656000 |
| C  | -7.37086400 | -1.26595000 | -0.37063900 |
| H  | -6.78381000 | 0.74064100  | -0.88164000 |
| C  | -8.22549400 | -2.59965400 | -2.23138100 |
| H  | -8.33154100 | -1.63732000 | -4.12133900 |
| C  | -7.05306400 | -1.14798900 | 1.00931500  |
| C  | -7.89347500 | -2.50680600 | -0.85427700 |
| H  | -8.62316200 | -3.53718000 | -2.61420000 |
| C  | -7.23820800 | -2.20722800 | 1.86926600  |
| H  | -6.66565900 | -0.20230200 | 1.37833000  |
| C  | -8.06593000 | -3.58422700 | 0.05487100  |
| C  | -7.74583600 | -3.43870500 | 1.38653400  |
| H  | -6.99809500 | -2.09348500 | 2.92214100  |
| H  | -8.45953300 | -4.52716900 | -0.31865400 |
| H  | -7.88474300 | -4.26912800 | 2.07400600  |
| C  | 6.86395300  | -1.40364500 | -1.22963800 |
| C  | 5.87350500  | -2.36665900 | -1.24866000 |
| C  | 7.93807000  | -1.55788200 | -0.30477400 |
| C  | 5.91028100  | -3.49458500 | -0.38249300 |
| H  | 5.02767200  | -2.27702000 | -1.92407200 |
| C  | 7.99549100  | -2.62859700 | 0.55706500  |
| H  | 8.73416700  | -0.82018300 | -0.27616200 |
| C  | 4.90471500  | -4.49925900 | -0.42044400 |
| C  | 6.98916000  | -3.63121600 | 0.54874200  |
| H  | 8.82572100  | -2.72202700 | 1.25390100  |
| C  | 4.95893400  | -5.58187400 | 0.43023900  |
| H  | 4.09456800  | -4.40360800 | -1.13781600 |
| C  | 7.01347100  | -4.75527900 | 1.41770600  |
| C  | 6.02015000  | -5.70847800 | 1.36089300  |
| H  | 4.18760900  | -6.34358700 | 0.37830300  |
| H  | 7.83537000  | -4.85554600 | 2.12331400  |
| H  | 6.05229200  | -6.56820400 | 2.02497100  |
| Cl | -0.23740200 | 1.19321100  | -0.31630500 |
| C  | 1.23647900  | -6.54247500 | -1.73516300 |
| C  | -1.23386600 | -4.24317300 | 1.98503000  |
| C  | -6.01856600 | 0.97121200  | 4.84579800  |
| C  | -1.24758800 | -0.57207300 | 4.51458400  |
| F  | -6.58758100 | 2.19060100  | 4.74314300  |
| F  | -6.91290400 | 0.08203700  | 4.34314900  |

|   |             |             |             |
|---|-------------|-------------|-------------|
| F | -5.88759700 | 0.69333100  | 6.16183700  |
| F | -0.32461600 | 0.33162200  | 4.97221700  |
| F | -0.58036200 | -1.31056100 | 3.58262500  |
| F | -1.53340800 | -1.38429700 | 5.54393600  |
| F | 2.57049200  | -6.68528400 | -1.49872100 |
| F | 1.08939600  | -6.52068700 | -3.07559100 |
| F | 0.63833800  | -7.66041000 | -1.27515600 |
| F | -2.14537300 | -3.25846500 | 2.10606900  |
| F | -1.86404500 | -5.41811400 | 2.18577500  |
| F | -0.35592100 | -4.09041000 | 3.01741100  |
| C | 1.92378400  | 0.38519600  | 1.72535600  |
| H | 1.89160200  | -0.37705800 | 0.95665200  |
| H | 1.02594000  | 0.42617700  | 2.32805800  |
| C | 2.69715400  | 1.56205100  | 1.48232600  |
| H | 3.12529100  | 1.65978600  | 0.48999200  |
| C | 2.95270200  | 2.46227400  | 2.47535000  |
| C | 2.50755100  | 2.11342100  | 3.87046800  |
| H | 2.78544600  | 2.88615500  | 4.58952500  |
| H | 1.42076600  | 1.98420000  | 3.93323500  |
| C | 3.18875000  | 0.77244100  | 4.31928800  |
| H | 2.93166400  | 0.60642800  | 5.37179900  |
| H | 4.27331100  | 0.89992400  | 4.26792500  |
| C | 2.73518300  | -0.43963500 | 3.54966700  |
| H | 1.80694700  | -0.87928800 | 3.90427200  |
| C | 3.48511800  | -1.22259200 | 2.68813600  |
| C | 2.97046800  | -2.56676900 | 2.26232500  |
| H | 1.93761000  | -2.74812600 | 2.56971000  |
| H | 3.60544600  | -3.34215900 | 2.71298500  |
| H | 3.06167800  | -2.70612200 | 1.17956500  |
| C | 4.82875000  | -0.83181200 | 2.15615900  |
| H | 5.24191800  | 0.06010700  | 2.62849100  |
| H | 4.77214800  | -0.64917600 | 1.07401800  |
| H | 5.53201000  | -1.66252300 | 2.28591800  |
| C | 3.78665800  | 3.65648900  | 2.23296500  |
| C | 3.62359700  | 4.82028900  | 3.00771400  |
| C | 4.75482800  | 3.67173500  | 1.20751500  |
| C | 4.38850800  | 5.95748200  | 2.76701900  |
| H | 2.86609600  | 4.85521200  | 3.78408000  |
| C | 5.52598000  | 4.80376800  | 0.97268000  |
| H | 4.91532000  | 2.78675100  | 0.60011100  |
| C | 5.34666100  | 5.95088700  | 1.75165200  |
| H | 4.23453400  | 6.85228300  | 3.36060000  |
| H | 6.26927100  | 4.79824100  | 0.18229900  |
| C | 6.22766600  | 7.15223600  | 1.53402900  |
| F | 6.58840300  | 7.28026500  | 0.23865300  |
| F | 7.37109900  | 7.06334300  | 2.25358000  |
| F | 5.61682700  | 8.29787000  | 1.90454300  |

#### TS-S-15:

Imaginary frequency: -172.16 cm<sup>-1</sup>

E[B3LYP/6-31G(d)]: -5531.658303 Hartree

E[PCM(CyH)-B3LYP-D3(BJ)/6-311+G(d,p)]: -5533.610369 Hartree

Free energy correction: 1.299282 Hartree

Free energy correction – Grimme quasi-RRHO: 1.297062 Hartree

Free energy correction – Truhlar quasi-RRHO: 1.308004 Hartree

|   |             |            |             |
|---|-------------|------------|-------------|
| O | -5.00129400 | 0.60548100 | -3.19567800 |
| C | -5.61392000 | 1.60215900 | -2.81104900 |
| C | -4.81171800 | 2.79678100 | -2.23559800 |

|   |              |             |             |
|---|--------------|-------------|-------------|
| H | -5.47408600  | 3.49100200  | -1.71971600 |
| N | -3.88862700  | 2.29504800  | -1.22357800 |
| C | -4.36740800  | 1.96859900  | 0.02409000  |
| N | -3.40952900  | 1.34220300  | 0.80783500  |
| H | -2.49051600  | 1.19400300  | 0.38099000  |
| C | -4.04580600  | 3.61242700  | -3.33382800 |
| H | -3.11720700  | 1.73476800  | -1.57124600 |
| C | -5.04355200  | 4.06156700  | -4.41967900 |
| H | -4.53473500  | 4.69488000  | -5.15563200 |
| H | -5.47381800  | 3.20996900  | -4.95738100 |
| H | -5.86588800  | 4.64949900  | -3.99364700 |
| C | -3.43814200  | 4.86302300  | -2.66723500 |
| H | -2.75155000  | 4.58816600  | -1.86087600 |
| H | -2.88120900  | 5.45360300  | -3.40473200 |
| H | -4.21833900  | 5.50738800  | -2.24268600 |
| C | -2.92084000  | 2.79036000  | -3.99651400 |
| H | -3.29967400  | 1.85386100  | -4.41267900 |
| H | -2.46597300  | 3.37678100  | -4.80418500 |
| H | -2.12027600  | 2.54860900  | -3.28704700 |
| N | -6.97484500  | 1.70264300  | -2.86480400 |
| C | -7.77475000  | 2.78266100  | -2.24313000 |
| C | -7.82575000  | 0.61858900  | -3.44077700 |
| C | -9.21565200  | 2.25724300  | -2.29459700 |
| H | -7.43757800  | 2.97192000  | -1.22065600 |
| C | -9.20467000  | 1.33317800  | -3.51377900 |
| H | -9.44213800  | 1.68644700  | -1.38851700 |
| H | -10.02989800 | 0.61589200  | -3.52630600 |
| H | -9.25329500  | 1.92337400  | -4.43837600 |
| H | -9.94554900  | 3.06847000  | -2.37429400 |
| H | -7.67985700  | 3.71088400  | -2.82194600 |
| C | -3.57010000  | 0.78993100  | 2.07224400  |
| C | -4.71270300  | 0.95052700  | 2.87439100  |
| C | -2.49747200  | 0.02685000  | 2.56868500  |
| C | -4.76666200  | 0.33521800  | 4.12676000  |
| H | -5.53665000  | 1.54719800  | 2.50811100  |
| C | -2.56609200  | -0.55558400 | 3.82897800  |
| H | -1.62562900  | -0.11196200 | 1.93795600  |
| C | -3.70454400  | -0.41693100 | 4.62638500  |
| H | -3.76361700  | -0.88264500 | 5.60177700  |
| O | 4.25732200   | 1.18207000  | -1.16048300 |
| C | 4.37877700   | 1.03463500  | -2.38583300 |
| C | 3.13898000   | 1.19906400  | -3.30982400 |
| H | 3.36732300   | 0.79074000  | -4.29452500 |
| N | 2.04100400   | 0.40551700  | -2.77898400 |
| C | 2.15544800   | -0.95822800 | -2.77106400 |
| N | 1.13024000   | -1.59243000 | -2.07984300 |
| H | 0.43340000   | -0.97217600 | -1.65399200 |
| C | 2.71049100   | 2.68933000  | -3.53786000 |
| H | 1.39622800   | 0.83293000  | -2.11672000 |
| C | 3.88892300   | 3.45795300  | -4.16915400 |
| H | 3.59373800   | 4.49423900  | -4.36802400 |
| H | 4.76371900   | 3.48529600  | -3.50974600 |
| H | 4.19357400   | 3.01475500  | -5.12499000 |
| C | 1.52841300   | 2.70109900  | -4.53008900 |
| H | 0.65016800   | 2.19226500  | -4.12275000 |
| H | 1.24367700   | 3.73461200  | -4.75938700 |
| H | 1.79512600   | 2.20902700  | -5.47350500 |
| C | 2.28984400   | 3.40352300  | -2.23808200 |
| H | 3.11191700   | 3.44688100  | -1.51910300 |
| H | 1.98905200   | 4.43174500  | -2.47199900 |
| H | 1.43493500   | 2.92303000  | -1.74935000 |

|   |             |             |             |
|---|-------------|-------------|-------------|
| N | 5.57230100  | 0.72450100  | -2.96087400 |
| C | 5.74771300  | 0.30451500  | -4.37383700 |
| C | 6.83384200  | 0.58762800  | -2.16656500 |
| C | 7.15814800  | -0.29588900 | -4.41608500 |
| H | 4.97988600  | -0.42182300 | -4.64901800 |
| C | 7.88773600  | 0.45661200  | -3.30312000 |
| H | 7.12173200  | -1.36718400 | -4.19398900 |
| H | 8.79263500  | -0.04581000 | -2.95200500 |
| H | 8.16750700  | 1.46104800  | -3.64648100 |
| H | 7.62583000  | -0.17193000 | -5.39708700 |
| H | 5.67351600  | 1.17271900  | -5.03960400 |
| C | 1.15775000  | -2.89317100 | -1.57551500 |
| C | 2.01927700  | -3.89827400 | -2.04646500 |
| C | 0.27753600  | -3.19110000 | -0.51782900 |
| C | 2.01096800  | -5.15402500 | -1.43538600 |
| H | 2.68211200  | -3.68398700 | -2.87249600 |
| C | 0.28876200  | -4.44999900 | 0.07349400  |
| H | -0.40084700 | -2.42419200 | -0.15626100 |
| C | 1.15643100  | -5.44856500 | -0.37456600 |
| H | 1.15809000  | -6.42872000 | 0.08608400  |
| C | -7.35691100 | 0.22077700  | -4.85319700 |
| H | -6.43798200 | -0.36316600 | -4.81925600 |
| H | -8.13571100 | -0.35554300 | -5.36328900 |
| H | -7.17803500 | 1.12532500  | -5.44480400 |
| C | 7.12006500  | 1.85077800  | -1.33452800 |
| H | 6.47002300  | 1.91456600  | -0.46254700 |
| H | 8.16386900  | 1.85736000  | -1.00420800 |
| H | 6.96752000  | 2.73933200  | -1.95611700 |
| O | 3.08198100  | -1.55524100 | -3.33061800 |
| O | -5.50773100 | 2.23799900  | 0.40950700  |
| C | -7.92467100 | -0.59133200 | -2.49287500 |
| C | -7.53154200 | -0.52639200 | -1.17122600 |
| C | -8.52056900 | -1.79951600 | -2.95866100 |
| C | -7.71269700 | -1.61888600 | -0.27995900 |
| H | -7.06324000 | 0.37132100  | -0.77913300 |
| C | -8.69932900 | -2.87938500 | -2.12632600 |
| H | -8.84248800 | -1.87671500 | -3.99275700 |
| C | -7.33308100 | -1.54101600 | 1.08717300  |
| C | -8.30704300 | -2.82723700 | -0.76297200 |
| H | -9.15189000 | -3.79190400 | -2.50861600 |
| C | -7.52755500 | -2.60800400 | 1.93543900  |
| H | -6.89041700 | -0.61961700 | 1.45548100  |
| C | -8.48747700 | -3.91387700 | 0.13357200  |
| C | -8.10681300 | -3.80758000 | 1.45296700  |
| H | -7.23965900 | -2.52480600 | 2.97918200  |
| H | -8.93594800 | -4.83217400 | -0.23951600 |
| H | -8.25269200 | -4.64455300 | 2.13101000  |
| C | 6.83163400  | -0.69642000 | -1.31209600 |
| C | 7.76906300  | -0.87888100 | -0.31052300 |
| C | 5.92969800  | -1.76204700 | -1.59192700 |
| C | 7.85263200  | -2.08733200 | 0.43304200  |
| H | 8.48042600  | -0.09312000 | -0.06988800 |
| C | 5.99171900  | -2.95064900 | -0.89922400 |
| H | 5.16511100  | -1.64087000 | -2.35101300 |
| C | 8.80680700  | -2.27686500 | 1.47093900  |
| C | 6.94732800  | -3.15454000 | 0.12947700  |
| H | 5.30329800  | -3.75581700 | -1.14165900 |
| C | 8.86112600  | -3.46142700 | 2.17123100  |
| H | 9.49794100  | -1.46917100 | 1.70200100  |
| C | 7.02989600  | -4.36692500 | 0.86739500  |
| C | 7.96509100  | -4.51733200 | 1.86697300  |

|    |             |             |             |
|----|-------------|-------------|-------------|
| H  | 9.59673100  | -3.59312500 | 2.96021500  |
| H  | 6.34318300  | -5.17345100 | 0.62025300  |
| H  | 8.02382800  | -5.44848700 | 2.42397100  |
| Cl | -0.46245300 | 0.75691000  | -0.51949100 |
| C  | 3.00921800  | -6.18381300 | -1.89254200 |
| C  | -0.55498500 | -4.69973200 | 1.29423800  |
| C  | -6.04175500 | 0.44942500  | 4.92000500  |
| C  | -1.36809100 | -1.29191700 | 4.35062200  |
| F  | -6.55974600 | 1.69448500  | 4.86679000  |
| F  | -6.99674800 | -0.38931300 | 4.44359200  |
| F  | -5.86255900 | 0.13931200  | 6.22313200  |
| F  | -0.46665300 | -0.44205500 | 4.93784300  |
| F  | -0.67473300 | -1.91626700 | 3.36049900  |
| F  | -1.67727000 | -2.21570000 | 5.27492500  |
| F  | 4.21790500  | -5.99883600 | -1.28418700 |
| F  | 3.23622600  | -6.12514000 | -3.21901000 |
| F  | 2.62169200  | -7.44099600 | -1.59579500 |
| F  | -1.64892000 | -3.91721900 | 1.33679700  |
| F  | -0.95763900 | -5.98375000 | 1.38142100  |
| F  | 0.15712700  | -4.44034200 | 2.42972000  |
| C  | 1.73455800  | 0.12437700  | 1.54078100  |
| H  | 1.87597400  | -0.55773400 | 0.71134700  |
| H  | 0.81010700  | -0.04312300 | 2.07803900  |
| C  | 2.30243300  | 1.43351900  | 1.44769900  |
| H  | 2.75868600  | 1.69263800  | 0.49780500  |
| C  | 2.34483600  | 2.26880900  | 2.52533100  |
| C  | 1.88421200  | 1.72835000  | 3.85222400  |
| H  | 1.99071000  | 2.46717300  | 4.64872800  |
| H  | 0.83129800  | 1.42642200  | 3.82784000  |
| C  | 2.74427900  | 0.47613100  | 4.24610000  |
| H  | 2.43517000  | 0.16826700  | 5.25123500  |
| H  | 3.79244200  | 0.78074400  | 4.30810100  |
| C  | 2.56966700  | -0.71509100 | 3.34051500  |
| H  | 1.72270200  | -1.35113300 | 3.58513400  |
| C  | 3.50530600  | -1.25687200 | 2.47483800  |
| C  | 3.28893500  | -2.62651000 | 1.90038100  |
| H  | 2.29869700  | -3.03071100 | 2.12183000  |
| H  | 4.04239200  | -3.30338500 | 2.32712300  |
| H  | 3.45772800  | -2.63569200 | 0.81751300  |
| C  | 4.77703100  | -0.57297200 | 2.08132000  |
| H  | 4.95220400  | 0.36255400  | 2.61328000  |
| H  | 4.77561300  | -0.36137600 | 1.00361800  |
| H  | 5.62432300  | -1.24629500 | 2.25745700  |
| C  | 2.97418000  | 3.60207700  | 2.43918600  |
| C  | 2.56608500  | 4.64897500  | 3.28692000  |
| C  | 3.98752000  | 3.86895700  | 1.49547300  |
| C  | 3.13840600  | 5.91393700  | 3.19424900  |
| H  | 1.76692800  | 4.48836200  | 4.00339000  |
| C  | 4.56684000  | 5.12926800  | 1.40869200  |
| H  | 4.33455900  | 3.08035100  | 0.83551900  |
| C  | 4.14529900  | 6.15666100  | 2.25805100  |
| H  | 2.79650100  | 6.71428700  | 3.84177300  |
| H  | 5.34819000  | 5.31737100  | 0.67978800  |
| C  | 4.81954300  | 7.50169700  | 2.20273800  |
| F  | 5.23846000  | 7.80056400  | 0.95378000  |
| F  | 5.91069500  | 7.54080100  | 3.00327200  |
| F  | 3.99781400  | 8.49341500  | 2.60766000  |

TS-S-16:

Imaginary frequency: -133.31 cm<sup>-1</sup>  
 E[B3LYP/6-31G(d)]: -5531.657864 Hartree  
 E[PCM(CyH)-B3LYP-D3(BJ)/6-311+G(d,p)]: -5533.608926 Hartree  
 Free energy correction: 1.298170 Hartree  
 Free energy correction – Grimme quasi-RRHO: 1.296019 Hartree  
 Free energy correction – Truhlar quasi-RRHO: 1.306714 Hartree

|   |             |             |             |
|---|-------------|-------------|-------------|
| O | -2.94019800 | 4.05047300  | -1.11400000 |
| C | -2.96236200 | 4.57224900  | 0.00996800  |
| C | -1.71326300 | 4.47528800  | 0.92244200  |
| H | -1.97887500 | 4.77668000  | 1.93622000  |
| N | -1.28446100 | 3.08809300  | 1.00565200  |
| C | -2.02029200 | 2.19955400  | 1.73830900  |
| N | -1.52607200 | 0.90159800  | 1.69402800  |
| H | -0.70608100 | 0.75314400  | 1.10128100  |
| C | -0.54178800 | 5.41516500  | 0.47279700  |
| H | -0.58601000 | 2.73143100  | 0.35540000  |
| C | -1.03818900 | 6.87519400  | 0.49750600  |
| H | -0.22006600 | 7.55119300  | 0.22478400  |
| H | -1.85598800 | 7.04477900  | -0.21193200 |
| H | -1.38466000 | 7.16614000  | 1.49666900  |
| C | 0.60889700  | 5.27011500  | 1.49080700  |
| H | 1.02576900  | 4.25913100  | 1.49479900  |
| H | 1.41865800  | 5.96568800  | 1.24186900  |
| H | 0.27069000  | 5.49902500  | 2.50892000  |
| C | -0.01751300 | 5.09147400  | -0.94044600 |
| H | -0.79850300 | 5.21466000  | -1.69515100 |
| H | 0.80771500  | 5.77129400  | -1.18376800 |
| H | 0.37130700  | 4.07011500  | -1.01705000 |
| N | -4.05477500 | 5.23598800  | 0.47319700  |
| C | -4.24780600 | 5.69451200  | 1.87050000  |
| C | -5.27409400 | 5.43549600  | -0.36853300 |
| C | -5.74748500 | 6.00285300  | 1.95595700  |
| H | -3.94175400 | 4.91271100  | 2.56899700  |
| C | -6.10043000 | 6.40603700  | 0.52355300  |
| H | -6.30249600 | 5.10581700  | 2.24815500  |
| H | -7.16912500 | 6.34398200  | 0.30098900  |
| H | -5.77329100 | 7.43556700  | 0.32835400  |
| H | -5.96366600 | 6.78616300  | 2.68817400  |
| H | -3.65306800 | 6.59665500  | 2.06011800  |
| C | -2.05303700 | -0.22985700 | 2.31957600  |
| C | -3.15501300 | -0.19469600 | 3.18995300  |
| C | -1.43218000 | -1.46784900 | 2.06376000  |
| C | -3.62985300 | -1.37900600 | 3.75456400  |
| H | -3.61671400 | 0.75487500  | 3.41928500  |
| C | -1.91294400 | -2.63346900 | 2.65500900  |
| H | -0.56880000 | -1.51135300 | 1.40713000  |
| C | -3.02351300 | -2.60634100 | 3.50130900  |
| H | -3.39175600 | -3.51431600 | 3.96089100  |
| O | 5.59288800  | 2.66780100  | 1.05101900  |
| C | 6.33966400  | 2.62383800  | 0.07163900  |
| C | 5.72353200  | 2.79535900  | -1.33891200 |
| H | 6.42765400  | 2.48338300  | -2.10873000 |
| N | 4.58146800  | 1.89158700  | -1.45380100 |
| C | 4.81978000  | 0.55868900  | -1.72832200 |
| N | 3.67856900  | -0.21804200 | -1.62175900 |
| H | 2.80972400  | 0.25793200  | -1.36501000 |
| C | 5.30757100  | 4.27285100  | -1.65642300 |
| H | 3.82865500  | 2.07854100  | -0.79902300 |
| C | 6.52306700  | 5.19903200  | -1.45437700 |
| H | 6.26289900  | 6.22531800  | -1.73862700 |



|   |             |             |             |
|---|-------------|-------------|-------------|
| H | 6.85368100  | 5.21869400  | -0.41039800 |
| H | 7.37211300  | 4.89168000  | -2.07710700 |
| C | 4.86942300  | 4.34093600  | -3.13303700 |
| H | 4.03267200  | 3.66328400  | -3.32778000 |
| H | 4.55385300  | 5.35952700  | -3.38976800 |
| H | 5.69131700  | 4.06557000  | -3.80584300 |
| C | 4.15158000  | 4.75896800  | -0.75924300 |
| H | 4.39676700  | 4.66071300  | 0.30104900  |
| H | 3.93726800  | 5.81304800  | -0.97537000 |
| H | 3.22940800  | 4.19762300  | -0.94881500 |
| N | 7.68544900  | 2.42258200  | 0.17283900  |
| C | 8.59839900  | 2.17490300  | -0.96669800 |
| C | 8.36669500  | 2.27928300  | 1.49492300  |
| C | 9.89345600  | 1.68238400  | -0.30723400 |
| H | 8.17164200  | 1.43524200  | -1.64915100 |
| C | 9.85987300  | 2.35321900  | 1.06730300  |
| H | 9.87170800  | 0.59351500  | -0.19844300 |
| H | 10.51298000 | 1.87588300  | 1.80294200  |
| H | 10.15620700 | 3.40710400  | 0.98296200  |
| H | 10.77833900 | 1.94568800  | -0.89439200 |
| H | 8.77604100  | 3.10454800  | -1.52307100 |
| C | 3.58205900  | -1.60466900 | -1.72255700 |
| C | 4.63341300  | -2.45124700 | -2.10555700 |
| C | 2.33033300  | -2.17087900 | -1.41654000 |
| C | 4.42562200  | -3.83355900 | -2.14134300 |
| H | 5.59220000  | -2.02484300 | -2.36522500 |
| C | 2.14501600  | -3.54496100 | -1.47869700 |
| H | 1.51992000  | -1.51623300 | -1.11546600 |
| C | 3.19238400  | -4.40096800 | -1.83284000 |
| H | 3.05055300  | -5.47439500 | -1.86440800 |
| C | -4.92981100 | 6.11806800  | -1.70601300 |
| H | -4.45298200 | 5.42724400  | -2.40054900 |
| H | -5.83379700 | 6.52735300  | -2.16839100 |
| H | -4.24959200 | 6.95609500  | -1.52140300 |
| C | 8.02502800  | 3.44906300  | 2.43700300  |
| H | 7.01163800  | 3.36511200  | 2.82765800  |
| H | 8.73443500  | 3.48479000  | 3.27023700  |
| H | 8.11475200  | 4.39401200  | 1.88999300  |
| O | 5.92169200  | 0.12450200  | -2.07064900 |
| O | -3.02311700 | 2.53692100  | 2.38076100  |
| C | -6.05431000 | 4.12151300  | -0.55789500 |
| C | -5.85645200 | 3.02587300  | 0.26014600  |
| C | -7.08250000 | 4.04996700  | -1.54277600 |
| C | -6.65784000 | 1.85582700  | 0.15049000  |
| H | -5.07275400 | 3.03132100  | 1.01223800  |
| C | -7.86424600 | 2.92724200  | -1.68592000 |
| H | -7.26223200 | 4.89820900  | -2.19589600 |
| C | -6.48091500 | 0.74378500  | 1.02001800  |
| C | -7.68584800 | 1.79797900  | -0.84417200 |
| H | -8.64240700 | 2.89958600  | -2.44562200 |
| C | -7.28456700 | -0.37045200 | 0.91266600  |
| H | -5.71079400 | 0.79132800  | 1.78442900  |
| C | -8.49058500 | 0.63082200  | -0.93853900 |
| C | -8.29799000 | -0.42793800 | -0.07725600 |
| H | -7.14464100 | -1.20025300 | 1.59843100  |
| H | -9.27353900 | 0.59328000  | -1.69282100 |
| H | -8.93413300 | -1.30695800 | -0.14488000 |
| C | 8.08339900  | 0.90658900  | 2.13319600  |
| C | 7.55814000  | -0.14684500 | 1.41181300  |
| C | 8.45464000  | 0.67366200  | 3.48945800  |
| C | 7.39182700  | -1.43849600 | 1.98162700  |

|    |             |             |             |
|----|-------------|-------------|-------------|
| H  | 7.25061800  | -0.00848600 | 0.37957200  |
| C  | 8.29420000  | -0.55977800 | 4.07575900  |
| H  | 8.87293100  | 1.48323300  | 4.07966200  |
| C  | 6.88075300  | -2.53000100 | 1.22896600  |
| C  | 7.76362700  | -1.65566800 | 3.34593500  |
| H  | 8.57999200  | -0.70932100 | 5.11477400  |
| C  | 6.73895100  | -3.77526100 | 1.79897100  |
| H  | 6.60887700  | -2.36892400 | 0.18946900  |
| C  | 7.59753000  | -2.94886000 | 3.90913600  |
| C  | 7.09660700  | -3.98573000 | 3.15358000  |
| H  | 6.35625000  | -4.59857100 | 1.20329800  |
| H  | 7.87707400  | -3.10764800 | 4.94843700  |
| H  | 6.97670400  | -4.97219900 | 3.59394400  |
| Cl | 0.71766600  | 1.06214500  | -0.76430100 |
| C  | 5.60102400  | -4.71794600 | -2.46215700 |
| C  | 0.79062900  | -4.12281600 | -1.18675800 |
| C  | -4.85652300 | -1.30143300 | 4.62299500  |
| C  | -1.25960100 | -3.95477500 | 2.33974900  |
| F  | -4.77723900 | -0.29936000 | 5.52333100  |
| F  | -5.97172500 | -1.05909700 | 3.87886000  |
| F  | -5.08232600 | -2.44432800 | 5.30246900  |
| F  | -1.44344400 | -4.85448800 | 3.33020700  |
| F  | 0.06859000  | -3.83132400 | 2.14415800  |
| F  | -1.77614100 | -4.51060000 | 1.21220300  |
| F  | 6.44133900  | -4.82688200 | -1.40087000 |
| F  | 6.33484100  | -4.23133500 | -3.48558100 |
| F  | 5.22359000  | -5.97214400 | -2.79339000 |
| F  | -0.04032500 | -3.21815600 | -0.60745800 |
| F  | 0.15290200  | -4.52635300 | -2.32640000 |
| F  | 0.84984500  | -5.19991300 | -0.38420000 |
| C  | -2.75956400 | 0.94375500  | -1.74501700 |
| H  | -3.17447500 | 1.93898300  | -1.59862000 |
| H  | -1.67591300 | 0.88830400  | -1.68184000 |
| C  | -3.54759900 | -0.19568900 | -1.48009000 |
| H  | -4.53074900 | -0.04546600 | -1.04144100 |
| C  | -3.12638200 | -1.45554000 | -1.85775100 |
| C  | -1.88028400 | -1.52231600 | -2.68538800 |
| H  | -1.57073000 | -2.54570200 | -2.89608300 |
| H  | -1.05034100 | -1.02401800 | -2.17143300 |
| C  | -2.09816900 | -0.78914800 | -4.06884400 |
| H  | -1.13197500 | -0.80297200 | -4.58112300 |
| H  | -2.78522300 | -1.39789100 | -4.66656300 |
| C  | -2.64834500 | 0.61269400  | -4.00015300 |
| H  | -3.72717100 | 0.70298100  | -4.09837000 |
| C  | -1.93640600 | 1.78517400  | -4.14795300 |
| C  | -2.65762000 | 3.09434700  | -4.26689200 |
| H  | -3.74418300 | 2.97305600  | -4.28179800 |
| H  | -2.39825300 | 3.74565200  | -3.42242300 |
| H  | -2.34320200 | 3.60801900  | -5.18481000 |
| C  | -0.44072000 | 1.85176900  | -4.14558500 |
| H  | 0.02932900  | 0.94392900  | -4.53178300 |
| H  | -0.09099100 | 2.70906400  | -4.72910500 |
| H  | -0.06881300 | 1.98049600  | -3.11582900 |
| C  | -3.94974700 | -2.65053800 | -1.62557200 |
| C  | -3.35071200 | -3.92070700 | -1.50232400 |
| C  | -5.35256600 | -2.55863200 | -1.49649700 |
| C  | -4.12062900 | -5.05003300 | -1.24594500 |
| H  | -2.27492900 | -4.02544300 | -1.55867000 |
| C  | -6.12177100 | -3.68981300 | -1.25973600 |
| H  | -5.85294300 | -1.60350600 | -1.60845400 |
| C  | -5.50786500 | -4.93963900 | -1.13192200 |

|   |             |             |             |
|---|-------------|-------------|-------------|
| H | -3.64051100 | -6.01460100 | -1.12298500 |
| H | -7.19925600 | -3.60255500 | -1.17031600 |
| C | -6.35270000 | -6.17149400 | -0.93197800 |
| F | -5.68056800 | -7.14204500 | -0.28058300 |
| F | -7.47104300 | -5.89941200 | -0.22505000 |
| F | -6.75131700 | -6.68903800 | -2.11718100 |

**TS-R-1:**

Imaginary frequency: -23.56 cm<sup>-1</sup>

E[B3LYP/6-31G(d)]: -5531.674064 Hartree

E[PCM(CyH)-B3LYP-D3(BJ)/6-311+G(d,p)]: -5533.639705 Hartree

Free energy correction: 1.305288 Hartree

Free energy correction – Grimme quasi-RRHO: 1.29957 Hartree

Free energy correction – Truhlar quasi-RRHO: 1.307285 Hartree

|   |             |             |             |
|---|-------------|-------------|-------------|
| O | 2.88118900  | 3.58953300  | -0.04652700 |
| C | 3.79238900  | 3.61328300  | -0.88516000 |
| C | 3.49421000  | 3.26190300  | -2.36570000 |
| H | 4.43690100  | 3.15198600  | -2.90453600 |
| N | 2.81103800  | 1.98038700  | -2.44561000 |
| C | 3.50070600  | 0.82356000  | -2.22001700 |
| N | 2.74021600  | -0.32113000 | -2.42091700 |
| H | 1.76670000  | -0.17196900 | -2.69935300 |
| C | 2.68840000  | 4.38553500  | -3.10765400 |
| H | 1.80806100  | 1.93831000  | -2.61470000 |
| C | 3.47020800  | 5.71090800  | -3.00608200 |
| H | 2.95745300  | 6.48794200  | -3.58371200 |
| H | 3.54486000  | 6.06549200  | -1.97256000 |
| H | 4.48494900  | 5.61492000  | -3.41188500 |
| C | 2.57768000  | 3.99446200  | -4.59683800 |
| H | 2.01225400  | 3.06819000  | -4.73594300 |
| H | 2.06120600  | 4.78598900  | -5.15206300 |
| H | 3.56821700  | 3.85877600  | -5.04874800 |
| C | 1.27577900  | 4.59291000  | -2.52774900 |
| H | 1.30611200  | 4.84461700  | -1.46572300 |
| H | 0.77726700  | 5.41185600  | -3.05815900 |
| H | 0.64772300  | 3.70274500  | -2.65102200 |
| N | 5.06105300  | 3.97282700  | -0.55137500 |
| C | 6.25520900  | 3.80400000  | -1.41248000 |
| C | 5.40614600  | 4.44403000  | 0.82519000  |
| C | 7.43157500  | 3.92190600  | -0.43660700 |
| H | 6.22362100  | 2.83397800  | -1.91267000 |
| C | 6.89359700  | 4.86550400  | 0.64006300  |
| H | 7.66524600  | 2.94291600  | -0.00623000 |
| H | 7.44430300  | 4.81460400  | 1.58324500  |
| H | 6.92918500  | 5.90318700  | 0.28395600  |
| H | 8.33445900  | 4.29924600  | -0.92558000 |
| H | 6.29708700  | 4.59715000  | -2.17020200 |
| C | 3.10989400  | -1.64299100 | -2.16871900 |
| C | 4.32179100  | -2.00866100 | -1.55306900 |
| C | 2.20666600  | -2.65466400 | -2.53440600 |
| C | 4.57969500  | -3.34917700 | -1.28018200 |
| H | 5.04018400  | -1.24045700 | -1.31110200 |
| C | 2.49921200  | -3.99330900 | -2.27266100 |
| H | 1.27673300  | -2.38883100 | -3.02819700 |
| C | 3.68174400  | -4.35860800 | -1.63333300 |
| H | 3.89468800  | -5.39704900 | -1.41369400 |
| O | -3.07322600 | -2.68652200 | -0.47949100 |
| C | -4.11805400 | -2.60438100 | -1.13465900 |

|   |             |             |             |
|---|-------------|-------------|-------------|
| C | -4.08805100 | -1.96232000 | -2.54544800 |
| H | -5.10837900 | -1.79477900 | -2.89136000 |
| N | -3.46060000 | -0.65127500 | -2.47169000 |
| C | -4.13760700 | 0.39814000  | -1.91889800 |
| N | -3.39302100 | 1.57145700  | -1.88861400 |
| H | -2.44406500 | 1.51374700  | -2.27154400 |
| C | -3.39396200 | -2.86552500 | -3.62245700 |
| H | -2.45673300 | -0.56664700 | -2.61215400 |
| C | -4.08946600 | -4.24149100 | -3.64373800 |
| H | -3.66646700 | -4.85905900 | -4.44385800 |
| H | -3.95225600 | -4.78438300 | -2.70227500 |
| H | -5.16594600 | -4.14811200 | -3.83404400 |
| C | -3.57849900 | -2.19594600 | -5.00023900 |
| H | -3.10684900 | -1.20938100 | -5.03601800 |
| H | -3.12346700 | -2.81541800 | -5.78185000 |
| H | -4.64085600 | -2.07259900 | -5.24550700 |
| C | -1.89073700 | -3.06954500 | -3.35221900 |
| H | -1.71193500 | -3.50817100 | -2.36892000 |
| H | -1.46899500 | -3.74235800 | -4.10718000 |
| H | -1.33061500 | -2.12858400 | -3.41297700 |
| N | -5.30942300 | -3.06687900 | -0.66289400 |
| C | -6.63182300 | -2.81496200 | -1.28412900 |
| C | -5.41970700 | -3.76363700 | 0.65467100  |
| C | -7.63404400 | -3.17640900 | -0.18143800 |
| H | -6.71179600 | -1.77068800 | -1.59311100 |
| C | -6.89636700 | -4.25208900 | 0.61661600  |
| H | -7.83425700 | -2.30359900 | 0.44825100  |
| H | -7.29498600 | -4.40278000 | 1.62359300  |
| H | -6.94101900 | -5.21299400 | 0.08770000  |
| H | -8.58751100 | -3.52274800 | -0.59089700 |
| H | -6.77000300 | -3.45945500 | -2.16192800 |
| C | -3.76312900 | 2.80110500  | -1.35130900 |
| C | -5.02767400 | 3.06982000  | -0.79624600 |
| C | -2.80337500 | 3.83009900  | -1.37164200 |
| C | -5.29146900 | 4.32691900  | -0.25363000 |
| H | -5.78301600 | 2.29684000  | -0.80713300 |
| C | -3.09775800 | 5.08279200  | -0.83694200 |
| H | -1.83117500 | 3.64266300  | -1.81934600 |
| C | -4.34108500 | 5.34737900  | -0.26289500 |
| H | -4.56495700 | 6.32048400  | 0.15338000  |
| C | 4.56419600  | 5.67266400  | 1.21854100  |
| H | 3.53475300  | 5.40323600  | 1.45350700  |
| H | 5.00754300  | 6.18036200  | 2.08118500  |
| H | 4.55821800  | 6.38679000  | 0.38869100  |
| C | -4.47189800 | -4.97600600 | 0.73277800  |
| H | -3.43713200 | -4.67155200 | 0.88669800  |
| H | -4.77315300 | -5.64330600 | 1.54674600  |
| H | -4.53551500 | -5.54707000 | -0.19923000 |
| O | -5.29886300 | 0.30601100  | -1.50302000 |
| O | 4.69054500  | 0.81476300  | -1.87912300 |
| C | 5.31820300  | 3.30286200  | 1.85479400  |
| C | 5.37757300  | 1.97450400  | 1.47894500  |
| C | 5.26973500  | 3.60629000  | 3.24644800  |
| C | 5.41013300  | 0.92609800  | 2.43823500  |
| H | 5.38765300  | 1.69894100  | 0.42830400  |
| C | 5.27897000  | 2.61387800  | 4.20013400  |
| H | 5.22608000  | 4.64097300  | 3.57108000  |
| C | 5.52087100  | -0.43826100 | 2.05277600  |
| C | 5.35563600  | 1.24480100  | 3.83258300  |
| H | 5.23943600  | 2.87407900  | 5.25570500  |
| C | 5.56974100  | -1.43885800 | 2.99919100  |

|    |             |             |             |
|----|-------------|-------------|-------------|
| H  | 5.59685700  | -0.67901100 | 0.99660400  |
| C  | 5.39399500  | 0.19072000  | 4.78482900  |
| C  | 5.49842500  | -1.12122700 | 4.37907500  |
| H  | 5.68250900  | -2.47144000 | 2.68204700  |
| H  | 5.35075000  | 0.43881600  | 5.84308100  |
| H  | 5.53798300  | -1.91837300 | 5.11662200  |
| C  | -5.22823800 | -2.78757700 | 1.83001700  |
| C  | -5.32793400 | -1.41914500 | 1.67024200  |
| C  | -5.02450900 | -3.29909900 | 3.14483300  |
| C  | -5.23592200 | -0.52795800 | 2.77443300  |
| H  | -5.47000500 | -0.98765300 | 0.68381400  |
| C  | -4.91956700 | -2.46384500 | 4.23271800  |
| H  | -4.94928000 | -4.37090100 | 3.29979300  |
| C  | -5.36103300 | 0.87979700  | 2.61278300  |
| C  | -5.02231900 | -1.05526000 | 4.08799300  |
| H  | -4.76030300 | -2.88060700 | 5.22485100  |
| C  | -5.27263200 | 1.72508100  | 3.69716300  |
| H  | -5.54000100 | 1.27920200  | 1.61850600  |
| C  | -4.92863100 | -0.15759300 | 5.18524800  |
| C  | -5.05022700 | 1.20136600  | 4.99526700  |
| H  | -5.38681900 | 2.79541400  | 3.55433000  |
| H  | -4.76568200 | -0.56309900 | 6.18145100  |
| H  | -4.98372000 | 1.87786700  | 5.84331000  |
| C  | -6.62687100 | 4.54666700  | 0.40623500  |
| C  | -2.03683100 | 6.14865200  | -0.88917800 |
| C  | 5.82600400  | -3.73301700 | -0.53026800 |
| C  | 1.49642300  | -5.04558300 | -2.66799200 |
| F  | 6.70230600  | -2.71336000 | -0.41478200 |
| F  | 5.52901500  | -4.13511900 | 0.74151100  |
| F  | 6.47203800  | -4.76541100 | -1.10919500 |
| F  | 2.01394000  | -6.28898300 | -2.62337600 |
| F  | 1.03188500  | -4.84267800 | -3.92338500 |
| F  | 0.41029900  | -5.03983500 | -1.85369700 |
| F  | -6.67844100 | 3.94251300  | 1.62432900  |
| F  | -7.64114100 | 4.03227100  | -0.31902100 |
| F  | -6.89121300 | 5.85468000  | 0.60849500  |
| F  | -1.62978000 | 6.39125700  | -2.15535100 |
| F  | -2.45279500 | 7.31948700  | -0.36673200 |
| F  | -0.92478700 | 5.77782200  | -0.19708500 |
| Cl | -0.34844900 | 0.82200100  | -2.79408600 |
| C  | 0.71637600  | 1.33287500  | 0.35555100  |
| H  | 1.45263500  | 2.12394000  | 0.21608200  |
| H  | -0.24786100 | 1.50239700  | -0.10035800 |
| C  | 1.10834400  | 0.04693900  | 0.72442200  |
| H  | 2.17240100  | -0.16139000 | 0.78881700  |
| C  | 0.18557400  | -0.94169400 | 1.03923200  |
| C  | -1.24552200 | -0.55052100 | 1.20923600  |
| H  | -1.88798700 | -1.40937400 | 1.39232200  |
| H  | -1.63129200 | -0.05071400 | 0.31430900  |
| C  | -1.38265300 | 0.43979400  | 2.44316100  |
| H  | -2.45347600 | 0.48128500  | 2.67156900  |
| H  | -0.88634400 | -0.00582100 | 3.30912800  |
| C  | -0.91155200 | 1.83031100  | 2.17220100  |
| H  | -1.57782600 | 2.42306200  | 1.54530900  |
| C  | 0.18622100  | 2.47489000  | 2.67544500  |
| C  | 0.41866100  | 3.93356500  | 2.38558600  |
| H  | -0.34277100 | 4.35648400  | 1.72636800  |
| H  | 0.42109100  | 4.50344600  | 3.32504500  |
| H  | 1.39899400  | 4.07899100  | 1.91682000  |
| C  | 1.17639200  | 1.83881200  | 3.61247500  |
| H  | 1.10443900  | 0.75013100  | 3.64770400  |

|   |             |             |            |
|---|-------------|-------------|------------|
| H | 2.20069400  | 2.11263700  | 3.33656100 |
| H | 1.01183000  | 2.21981600  | 4.63017200 |
| C | 0.62270100  | -2.31529500 | 1.31735400 |
| C | -0.24335400 | -3.39225500 | 1.03143900 |
| C | 1.92575800  | -2.60126900 | 1.78035400 |
| C | 0.19724600  | -4.70425300 | 1.16565900 |
| H | -1.23472200 | -3.20670300 | 0.63185900 |
| C | 2.35722200  | -3.91301800 | 1.92294000 |
| H | 2.60515800  | -1.79935400 | 2.04944300 |
| C | 1.49657700  | -4.96759200 | 1.60256900 |
| H | -0.46409400 | -5.52419700 | 0.90808100 |
| H | 3.36491100  | -4.11898000 | 2.26372900 |
| C | 1.99757700  | -6.38709500 | 1.63604500 |
| F | 2.46989100  | -6.76526700 | 0.42217800 |
| F | 3.00360100  | -6.54962700 | 2.52038500 |
| F | 1.01940600  | -7.25819700 | 1.96345000 |

**TS-R-2:**

Imaginary frequency: -22.57 cm<sup>-1</sup>

E[B3LYP/6-31G(d)]: -5531.673850 Hartree

E[PCM(CyH)-B3LYP-D3(BJ)/6-311+G(d,p)]: -5533.638945 Hartree

Free energy correction: 1.307840 Hartree

Free energy correction – Grimme quasi-RRHO: 1.301311 Hartree

Free energy correction – Truhlar quasi-RRHO: 1.308567 Hartree

|   |             |            |             |
|---|-------------|------------|-------------|
| O | 0.72538600  | 3.04659000 | 0.93688000  |
| C | 1.07885400  | 4.01714700 | 0.25453500  |
| C | 0.69146300  | 4.08088600 | -1.24718500 |
| H | 1.33172200  | 4.80011300 | -1.76033400 |
| N | 0.93576700  | 2.79018300 | -1.86509100 |
| C | 2.21514900  | 2.33244500 | -2.00959200 |
| N | 2.26655200  | 1.04823500 | -2.54290900 |
| H | 1.36172300  | 0.59574400 | -2.69116300 |
| C | -0.79144000 | 4.53817000 | -1.48603800 |
| H | 0.17566800  | 2.11589200 | -1.91738800 |
| C | -0.98368000 | 5.97581200 | -0.96274800 |
| H | -2.01765700 | 6.29315700 | -1.13669800 |
| H | -0.78872700 | 6.05474400 | 0.11253000  |
| H | -0.33046000 | 6.68525200 | -1.48488100 |
| C | -1.05734300 | 4.54159900 | -3.00690100 |
| H | -0.98211900 | 3.53947000 | -3.43901500 |
| H | -2.06374000 | 4.92040400 | -3.21004600 |
| H | -0.34040600 | 5.18512200 | -3.53176600 |
| C | -1.81290200 | 3.62099100 | -0.78368900 |
| H | -1.67707400 | 3.62689800 | 0.30115700  |
| H | -2.82489200 | 3.97413500 | -1.00356900 |
| H | -1.74670700 | 2.58163900 | -1.12381800 |
| N | 1.78199600  | 5.06278300 | 0.77275500  |
| C | 2.45885900  | 6.10385000 | -0.04052600 |
| C | 2.09513600  | 5.19012200 | 2.22751400  |
| C | 3.34819600  | 6.84970800 | 0.96269000  |
| H | 3.03458000  | 5.63999100 | -0.84588100 |
| C | 2.61025400  | 6.65667800 | 2.28787100  |
| H | 4.34005000  | 6.38962600 | 1.00891300  |
| H | 3.23696600  | 6.82801600 | 3.16716700  |
| H | 1.74916100  | 7.33502200 | 2.34652100  |
| H | 3.47621700  | 7.90154700 | 0.69114400  |
| H | 1.72033600  | 6.78247900 | -0.48124100 |
| C | 3.37356200  | 0.20470200 | -2.62196900 |

|   |             |             |             |
|---|-------------|-------------|-------------|
| C | 4.70107600  | 0.64308900  | -2.46503200 |
| C | 3.13030400  | -1.15852700 | -2.85628700 |
| C | 5.73820200  | -0.28546200 | -2.50237500 |
| H | 4.89271800  | 1.69256700  | -2.29897900 |
| C | 4.18706000  | -2.06595200 | -2.90511100 |
| H | 2.10758800  | -1.50591500 | -2.96940000 |
| C | 5.50304900  | -1.64499600 | -2.72361300 |
| H | 6.31765000  | -2.35826300 | -2.71726100 |
| O | -2.15317900 | -3.24573700 | 0.61835200  |
| C | -3.06545700 | -3.85217100 | 0.03779200  |
| C | -3.17261600 | -3.78141300 | -1.50531300 |
| H | -4.13131300 | -4.19120100 | -1.82149300 |
| N | -3.17551600 | -2.38862500 | -1.92342400 |
| C | -4.31359600 | -1.64576700 | -1.75995400 |
| N | -4.16716500 | -0.32146700 | -2.14954100 |
| H | -3.23045400 | -0.04125400 | -2.44360400 |
| C | -2.07337800 | -4.61122200 | -2.25531800 |
| H | -2.28825900 | -1.89763000 | -2.02374000 |
| C | -2.18358700 | -6.08662600 | -1.82048800 |
| H | -1.45480500 | -6.69357500 | -2.36944700 |
| H | -1.98079500 | -6.21572700 | -0.75119500 |
| H | -3.17902100 | -6.49636100 | -2.03185800 |
| C | -2.35934700 | -4.51927700 | -3.76881500 |
| H | -2.27012300 | -3.49227600 | -4.13404300 |
| H | -1.64542700 | -5.13958300 | -4.32308600 |
| H | -3.36948800 | -4.87526300 | -4.00633500 |
| C | -0.64026000 | -4.11472800 | -1.98132800 |
| H | -0.37140900 | -4.23480400 | -0.92901400 |
| H | 0.07157500  | -4.69312400 | -2.58163300 |
| H | -0.50437600 | -3.06082300 | -2.24699000 |
| N | -3.99143900 | -4.58018100 | 0.71745000  |
| C | -5.23426900 | -5.14344900 | 0.13489400  |
| C | -3.92246400 | -4.76126800 | 2.20046000  |
| C | -6.10571400 | -5.45081500 | 1.35741600  |
| H | -5.69819800 | -4.41762200 | -0.53542400 |
| C | -5.07698700 | -5.77709700 | 2.44057200  |
| H | -6.68873800 | -4.56743100 | 1.63690200  |
| H | -5.47075200 | -5.70151300 | 3.45772000  |
| H | -4.69316400 | -6.79615700 | 2.30138500  |
| H | -6.80477100 | -6.27051600 | 1.16765700  |
| H | -5.01049400 | -6.06067200 | -0.42513000 |
| C | -5.12709300 | 0.68913000  | -2.09384900 |
| C | -6.40131700 | 0.52668700  | -1.52516400 |
| C | -4.78715600 | 1.94055900  | -2.64090100 |
| C | -7.28233400 | 1.60771300  | -1.47814700 |
| H | -6.68878200 | -0.44120000 | -1.14055900 |
| C | -5.69030700 | 2.99898500  | -2.59844200 |
| H | -3.81632700 | 2.07529800  | -3.10695200 |
| C | -6.94761900 | 2.85051300  | -2.00914800 |
| H | -7.64835200 | 3.67509300  | -1.98052500 |
| C | 0.83348700  | 5.04283000  | 3.09744200  |
| H | 0.49553300  | 4.00915700  | 3.15375200  |
| H | 1.02785500  | 5.41091600  | 4.10993000  |
| H | 0.02628300  | 5.65165700  | 2.67675100  |
| C | -2.58035300 | -5.39210800 | 2.61769300  |
| H | -1.76198700 | -4.67553900 | 2.55091000  |
| H | -2.63833900 | -5.77712000 | 3.64069300  |
| H | -2.35868400 | -6.24013400 | 1.96125000  |
| O | -5.37164500 | -2.12525900 | -1.33503800 |
| O | 3.20969300  | 3.00375900  | -1.71301000 |
| C | 3.23198200  | 4.24506500  | 2.65610500  |

|    |             |             |             |
|----|-------------|-------------|-------------|
| C  | 4.02336700  | 3.58364300  | 1.73791700  |
| C  | 3.56410600  | 4.13372800  | 4.03850100  |
| C  | 5.16945000  | 2.84189800  | 2.13753200  |
| H  | 3.79075400  | 3.62282600  | 0.67782600  |
| C  | 4.65190300  | 3.40505300  | 4.45939500  |
| H  | 2.95589100  | 4.64285100  | 4.78037700  |
| C  | 6.02324400  | 2.21803400  | 1.18717200  |
| C  | 5.49945200  | 2.74993300  | 3.52718200  |
| H  | 4.88611400  | 3.33947300  | 5.51971200  |
| C  | 7.15604500  | 1.54473300  | 1.59243100  |
| H  | 5.77873900  | 2.29813900  | 0.13194300  |
| C  | 6.66243500  | 2.03268000  | 3.91519600  |
| C  | 7.47558900  | 1.44694100  | 2.97011400  |
| H  | 7.80604300  | 1.08969100  | 0.85079600  |
| H  | 6.90804500  | 1.96447300  | 4.97269100  |
| H  | 8.36985200  | 0.91103700  | 3.27675000  |
| C  | -4.22131400 | -3.44942300 | 2.94876900  |
| C  | -4.85833800 | -2.38570900 | 2.33932400  |
| C  | -3.91494400 | -3.34439600 | 4.33711100  |
| C  | -5.21038100 | -1.21074400 | 3.05845100  |
| H  | -5.10003700 | -2.42082500 | 1.28104000  |
| C  | -4.23161800 | -2.21677900 | 5.05927300  |
| H  | -3.42550300 | -4.16949000 | 4.84541600  |
| C  | -5.88945000 | -0.12752700 | 2.43645900  |
| C  | -4.88916900 | -1.11598800 | 4.45014800  |
| H  | -3.98540700 | -2.16233500 | 6.11756400  |
| C  | -6.23126800 | 0.99620400  | 3.15492700  |
| H  | -6.14710700 | -0.20340800 | 1.38411200  |
| C  | -5.24621000 | 0.06024400  | 5.16255800  |
| C  | -5.90253100 | 1.09297800  | 4.53001500  |
| H  | -6.76437000 | 1.80524800  | 2.66448600  |
| H  | -5.00020300 | 0.12773900  | 6.22010900  |
| H  | -6.17774900 | 1.98508700  | 5.08641000  |
| C  | -8.59745500 | 1.41585100  | -0.77123700 |
| C  | -5.29017200 | 4.34113300  | -3.14889000 |
| C  | 7.15709700  | 0.16308200  | -2.27449700 |
| C  | 3.88201600  | -3.51674000 | -3.16698400 |
| F  | 7.93882900  | -0.05430400 | -3.35272800 |
| F  | 7.24514100  | 1.47724500  | -1.96948000 |
| F  | 7.72888500  | -0.51634700 | -1.24235400 |
| F  | 4.88791000  | -4.32917500 | -2.77231300 |
| F  | 3.66560500  | -3.76117700 | -4.47785000 |
| F  | 2.76407100  | -3.91995600 | -2.50875500 |
| F  | -8.42955400 | 1.39990400  | 0.57856400  |
| F  | -9.18315700 | 0.24483900  | -1.09800800 |
| F  | -9.47732000 | 2.40234300  | -1.04400200 |
| F  | -4.40708800 | 4.23413600  | -4.16647900 |
| F  | -6.35106500 | 5.04064300  | -3.60169500 |
| F  | -4.69405500 | 5.11554200  | -2.20044800 |
| Cl | -0.82720400 | -0.04658800 | -2.31832000 |
| C  | 0.01485500  | -0.38235900 | 0.57336000  |
| H  | -0.24386400 | 0.66218100  | 0.44496800  |
| H  | -0.78386700 | -1.10610900 | 0.47389000  |
| C  | 1.36915700  | -0.75908600 | 0.56114000  |
| H  | 2.09290300  | -0.01057900 | 0.25196000  |
| C  | 1.80535400  | -1.99545500 | 0.99116500  |
| C  | 0.84753100  | -2.91221200 | 1.67915600  |
| H  | 1.32069700  | -3.86712600 | 1.91630600  |
| H  | -0.05149400 | -3.10615900 | 1.08780100  |
| C  | 0.37601000  | -2.25988300 | 3.04571400  |
| H  | -0.12848800 | -3.06019500 | 3.59973600  |



|   |             |             |             |
|---|-------------|-------------|-------------|
| H | 1.25545400  | -1.96825800 | 3.62602100  |
| C | -0.59612300 | -1.14017900 | 2.87022700  |
| H | -1.59628300 | -1.45593800 | 2.57835100  |
| C | -0.40117500 | 0.19287300  | 3.11363200  |
| C | -1.55380700 | 1.15756900  | 3.01425900  |
| H | -2.45706900 | 0.68967900  | 2.61365400  |
| H | -1.79349200 | 1.55102200  | 4.01178200  |
| H | -1.28076500 | 2.01685500  | 2.39088900  |
| C | 0.90052900  | 0.79604800  | 3.56354700  |
| H | 1.72085200  | 0.07797300  | 3.61879500  |
| H | 1.18866700  | 1.60835200  | 2.88574200  |
| H | 0.77445000  | 1.24238000  | 4.55941300  |
| C | 3.23337500  | -2.35592600 | 0.93400000  |
| C | 3.60644500  | -3.68541200 | 0.64972400  |
| C | 4.25113100  | -1.40071300 | 1.11796800  |
| C | 4.94413300  | -4.04034500 | 0.52480900  |
| H | 2.84343300  | -4.43520600 | 0.47011500  |
| C | 5.59071600  | -1.76042000 | 1.01783600  |
| H | 4.00122500  | -0.37522900 | 1.37047500  |
| C | 5.93956100  | -3.07810200 | 0.71416600  |
| H | 5.21505900  | -5.06112800 | 0.27771600  |
| H | 6.35910800  | -1.01390400 | 1.17660700  |
| C | 7.38545300  | -3.45426600 | 0.52261600  |
| F | 8.21469300  | -2.64204800 | 1.20896500  |
| F | 7.62697400  | -4.72167900 | 0.92677900  |
| F | 7.74937800  | -3.38543900 | -0.78058700 |

### TS-R-3:

Imaginary frequency: -23.66 cm<sup>-1</sup>

E[B3LYP/6-31G(d)]: -5531.672534 Hartree

E[PCM(CyH)-B3LYP-D3(BJ)/6-311+G(d,p)]: -5533.637052 Hartree

Free energy correction: 1.305094 Hartree

Free energy correction – Grimme quasi-RRHO: 1.299467 Hartree

Free energy correction – Truhlar quasi-RRHO: 1.307261 Hartree

|   |            |             |             |
|---|------------|-------------|-------------|
| O | 3.13225700 | 3.41252500  | -0.04561300 |
| C | 4.07144900 | 3.35157400  | -0.85071700 |
| C | 3.79861100 | 3.00025500  | -2.33586900 |
| H | 4.74855300 | 2.81521100  | -2.84040200 |
| N | 3.02708500 | 1.77032100  | -2.42343600 |
| C | 3.62402900 | 0.56954100  | -2.16594800 |
| N | 2.79297800 | -0.52040200 | -2.39066800 |
| H | 1.84531000 | -0.30570300 | -2.71249800 |
| C | 3.10222600 | 4.16827100  | -3.11858800 |
| H | 2.03224600 | 1.79717000  | -2.63830100 |
| C | 3.97498700 | 5.43462700  | -3.00542400 |
| H | 3.54136900 | 6.23811300  | -3.61104100 |
| H | 4.03859400 | 5.79839600  | -1.97435300 |
| H | 4.99379200 | 5.25889100  | -3.37257400 |
| C | 3.01379700 | 3.76462700  | -4.60599400 |
| H | 2.38493600 | 2.88164000  | -4.75420200 |
| H | 2.57823900 | 4.58449600  | -5.18878300 |
| H | 4.00626200 | 3.54829900  | -5.02073400 |
| C | 1.68936400 | 4.48664200  | -2.59159900 |
| H | 1.70139600 | 4.75856700  | -1.53410800 |
| H | 1.26923400 | 5.32728100  | -3.15496400 |
| H | 1.00406900 | 3.64046200  | -2.71912600 |
| N | 5.35163900 | 3.61719700  | -0.47572700 |
| C | 6.55925600 | 3.34532900  | -1.29022300 |

|   |             |             |             |
|---|-------------|-------------|-------------|
| C | 5.68227300  | 4.08131500  | 0.90688900  |
| C | 7.70447700  | 3.38133000  | -0.27184700 |
| H | 6.46960700  | 2.37517600  | -1.78295700 |
| C | 7.20491500  | 4.37892700  | 0.77428300  |
| H | 7.84248000  | 2.39236900  | 0.17669600  |
| H | 7.71423300  | 4.29602800  | 1.73821900  |
| H | 7.33776300  | 5.40563200  | 0.40951500  |
| H | 8.65228100  | 3.67874300  | -0.73000600 |
| H | 6.69142800  | 4.12429800  | -2.05238800 |
| C | 3.05940900  | -1.86289600 | -2.11852400 |
| C | 4.21168400  | -2.30617400 | -1.44260300 |
| C | 2.10922500  | -2.81348800 | -2.52716300 |
| C | 4.36536200  | -3.65979700 | -1.15568100 |
| H | 4.96773700  | -1.58692300 | -1.16715800 |
| C | 2.29800300  | -4.16747200 | -2.24976100 |
| H | 1.22538300  | -2.48817000 | -3.06771600 |
| C | 3.42046300  | -4.60830500 | -1.55210000 |
| H | 3.55301500  | -5.65795100 | -1.32276900 |
| O | -3.31887500 | -2.28507000 | -0.64049200 |
| C | -4.31454500 | -2.17107300 | -1.36523300 |
| C | -4.14832400 | -1.64521600 | -2.81556000 |
| H | -5.12899200 | -1.42867200 | -3.23948200 |
| N | -3.42535500 | -0.38075700 | -2.78567300 |
| C | -4.04232800 | 0.72912500  | -2.27951400 |
| N | -3.20377000 | 1.83362400  | -2.19370200 |
| H | -2.24913700 | 1.70545500  | -2.54426500 |
| C | -3.46481000 | -2.67332100 | -3.77904800 |
| H | -2.40882900 | -0.39015400 | -2.82622400 |
| C | -4.26722400 | -3.98969500 | -3.75004300 |
| H | -3.84900200 | -4.69678400 | -4.47504500 |
| H | -4.23203100 | -4.46893700 | -2.76548000 |
| H | -5.31925500 | -3.82796600 | -4.01645600 |
| C | -3.51217500 | -2.09389700 | -5.20824300 |
| H | -2.96310500 | -1.15016900 | -5.27857800 |
| H | -3.06139200 | -2.80063000 | -5.91467800 |
| H | -4.54474700 | -1.90955500 | -5.53033400 |
| C | -2.00160900 | -2.97016300 | -3.39873500 |
| H | -1.91799900 | -3.35869900 | -2.38213900 |
| H | -1.58697900 | -3.71754600 | -4.08400300 |
| H | -1.36801700 | -2.07824400 | -3.47531300 |
| N | -5.56442600 | -2.48573800 | -0.92727200 |
| C | -6.82539800 | -2.19079800 | -1.64845800 |
| C | -5.80090200 | -3.01988400 | 0.45053200  |
| C | -7.90830100 | -2.31759300 | -0.57055200 |
| H | -6.78825400 | -1.18888900 | -2.08014600 |
| C | -7.32081200 | -3.35214300 | 0.38996100  |
| H | -8.05029200 | -1.35830900 | -0.06250300 |
| H | -7.77191400 | -3.33517000 | 1.38539900  |
| H | -7.44724600 | -4.36164000 | -0.02221000 |
| H | -8.87175100 | -2.62063400 | -0.99100100 |
| H | -6.98553500 | -2.92245900 | -2.45111700 |
| C | -3.46661800 | 3.04506700  | -1.55952200 |
| C | -4.64738500 | 3.31703300  | -0.84499300 |
| C | -2.47217000 | 4.03891400  | -1.62133200 |
| C | -4.79251800 | 4.53724200  | -0.18657900 |
| H | -5.43411100 | 2.57658900  | -0.82460600 |
| C | -2.65007900 | 5.25855900  | -0.97095800 |
| H | -1.56615300 | 3.85129500  | -2.19033400 |
| C | -3.80675900 | 5.52237000  | -0.23643600 |
| H | -3.94084900 | 6.47040100  | 0.26754500  |
| C | 4.92807600  | 5.37982700  | 1.25055100  |

|    |             |             |             |
|----|-------------|-------------|-------------|
| H  | 3.87135000  | 5.19799500  | 1.44515700  |
| H  | 5.37573100  | 5.86316900  | 2.12487100  |
| H  | 5.01415200  | 6.07938400  | 0.41275400  |
| C  | -5.00076300 | -4.31187500 | 0.69870800  |
| H  | -3.94369600 | -4.10650900 | 0.86457800  |
| H  | -5.40178000 | -4.84670000 | 1.56595900  |
| H  | -5.10064800 | -4.97275200 | -0.16851400 |
| O  | -5.23329200 | 0.74223300  | -1.94795000 |
| O  | 4.79624000  | 0.47939600  | -1.77882600 |
| C  | 5.46250600  | 2.96734900  | 1.94660700  |
| C  | 5.43333600  | 1.63255900  | 1.59030400  |
| C  | 5.37769600  | 3.29560500  | 3.33078000  |
| C  | 5.33919800  | 0.60018000  | 2.56272800  |
| H  | 5.46718100  | 1.34050200  | 0.54461800  |
| C  | 5.26589800  | 2.32072800  | 4.29603600  |
| H  | 5.40208200  | 4.33545200  | 3.64053900  |
| C  | 5.35589800  | -0.77466800 | 2.19941100  |
| C  | 5.24837900  | 0.94424700  | 3.94915200  |
| H  | 5.20086300  | 2.59994700  | 5.34546900  |
| C  | 5.28005700  | -1.76081500 | 3.15907300  |
| H  | 5.46005200  | -1.03741600 | 1.15086100  |
| C  | 5.15823100  | -0.09434400 | 4.91490900  |
| C  | 5.17304600  | -1.41665500 | 4.53029100  |
| H  | 5.32227900  | -2.80403800 | 2.86003600  |
| H  | 5.08799200  | 0.17314900  | 5.96697100  |
| H  | 5.11408500  | -2.20263200 | 5.27844500  |
| C  | -5.54282500 | -1.94453100 | 1.52525500  |
| C  | -5.34998500 | -2.29727900 | 2.84878400  |
| C  | -5.59351000 | -0.55875600 | 1.19994000  |
| C  | -5.21410700 | -1.32564200 | 3.87660900  |
| H  | -5.30522600 | -3.34283500 | 3.14083900  |
| C  | -5.47658000 | 0.40927100  | 2.17230700  |
| H  | -5.70883700 | -0.25171900 | 0.16626700  |
| C  | -5.01544000 | -1.68510400 | 5.23785800  |
| C  | -5.28860800 | 0.06295800  | 3.53619500  |
| H  | -5.53621000 | 1.46130900  | 1.90277900  |
| C  | -4.90014500 | -0.71980900 | 6.21295900  |
| H  | -4.95870000 | -2.73975800 | 5.49827200  |
| C  | -5.16877900 | 1.03617400  | 4.56517600  |
| C  | -4.97894900 | 0.65445200  | 5.87439400  |
| H  | -4.75120600 | -1.00924700 | 7.24986200  |
| H  | -5.23663400 | 2.08828900  | 4.29722800  |
| H  | -4.89251100 | 1.40569100  | 6.65489900  |
| C  | -6.02788900 | 4.74530900  | 0.64843400  |
| C  | -1.54876300 | 6.28130900  | -1.04662000 |
| C  | 5.54304100  | -4.12098600 | -0.34129800 |
| C  | 1.24751100  | -5.15287900 | -2.69108000 |
| F  | 6.49000500  | -3.16954300 | -0.20543000 |
| F  | 5.15885500  | -4.46868900 | 0.92345100  |
| F  | 6.13150100  | -5.21365100 | -0.86852100 |
| F  | 1.68552100  | -6.42611800 | -2.63881600 |
| F  | 0.84321700  | -4.91335300 | -3.96106400 |
| F  | 0.13429500  | -5.08536500 | -1.91753600 |
| F  | -5.95087600 | 4.04827300  | 1.81732200  |
| F  | -7.14338900 | 4.31943700  | 0.02232500  |
| F  | -6.21320600 | 6.03950900  | 0.98138600  |
| F  | -1.08951800 | 6.43479200  | -2.30816400 |
| F  | -1.94041500 | 7.49367200  | -0.60585900 |
| F  | -0.47552300 | 5.91639600  | -0.29191100 |
| Cl | -0.18365300 | 0.83682700  | -2.90674600 |
| C  | 0.79960600  | 1.32788100  | 0.29552600  |

|   |             |             |             |
|---|-------------|-------------|-------------|
| H | 1.60402800  | 2.05611600  | 0.19694500  |
| H | -0.12277600 | 1.57520600  | -0.20961400 |
| C | 1.06545400  | 0.01456900  | 0.68009100  |
| H | 2.10450900  | -0.28033900 | 0.79492800  |
| C | 0.05006300  | -0.89354000 | 0.94902400  |
| C | -1.34946100 | -0.38406700 | 1.05496400  |
| H | -2.06948400 | -1.18462500 | 1.20890800  |
| H | -1.65224600 | 0.14151700  | 0.14312700  |
| C | -1.46037200 | 0.61843200  | 2.28041700  |
| H | -2.53423700 | 0.74279900  | 2.45969200  |
| H | -1.04353400 | 0.13753700  | 3.16904700  |
| C | -0.86419100 | 1.96446100  | 2.03154900  |
| H | -1.44596100 | 2.60709200  | 1.37062800  |
| C | 0.25631900  | 2.51835700  | 2.58980100  |
| C | 0.62438800  | 3.95089500  | 2.31089100  |
| H | -0.06523200 | 4.43310800  | 1.61452000  |
| H | 0.62867400  | 4.52281500  | 3.24910000  |
| H | 1.63538600  | 4.01160100  | 1.89110400  |
| C | 1.14137600  | 1.80621100  | 3.57596200  |
| H | 0.97825900  | 0.72732400  | 3.60722400  |
| H | 2.19759800  | 1.99367600  | 3.35342000  |
| H | 0.95672100  | 2.20324200  | 4.58404000  |
| C | 0.35685600  | -2.29930600 | 1.24030300  |
| C | -0.58720400 | -3.29816000 | 0.91919700  |
| C | 1.61191100  | -2.69659600 | 1.75122200  |
| C | -0.26692200 | -4.64326000 | 1.06604800  |
| H | -1.54347900 | -3.02727200 | 0.48422400  |
| C | 1.92317900  | -4.04063800 | 1.90578000  |
| H | 2.34715000  | -1.95630900 | 2.04856700  |
| C | 0.98763600  | -5.01734900 | 1.55043700  |
| H | -0.98630400 | -5.40343600 | 0.78221400  |
| H | 2.89638200  | -4.33255100 | 2.28238200  |
| C | 1.36463400  | -6.47429900 | 1.59913600  |
| F | 1.86667900  | -6.88732400 | 0.40887900  |
| F | 2.30628300  | -6.72312900 | 2.53312600  |
| F | 0.30124600  | -7.26077700 | 1.86947300  |

#### TS-R-4:

Imaginary frequency: -84.43 cm<sup>-1</sup>

E[B3LYP/6-31G(d)]: -5531.671254 Hartree

E[PCM(CyH)-B3LYP-D3(BJ)/6-311+G(d,p)]: -5533.636209 Hartree

Free energy correction: 1.304959 Hartree

Free energy correction – Grimme quasi-RRHO: 1.299597 Hartree

Free energy correction – Truhlar quasi-RRHO: 1.307774 Hartree

|   |             |             |             |
|---|-------------|-------------|-------------|
| O | -3.08588900 | -2.53184900 | -0.58667400 |
| C | -4.10913500 | -2.51426000 | -1.28041400 |
| C | -4.04085400 | -1.97126100 | -2.73232900 |
| H | -5.05051100 | -1.85495100 | -3.12637200 |
| N | -3.45065200 | -0.63917400 | -2.71768800 |
| C | -4.16683400 | 0.40403400  | -2.20220300 |
| N | -3.44725300 | 1.59190700  | -2.14744100 |
| H | -2.49918600 | 1.56659600  | -2.53693700 |
| C | -3.28517400 | -2.92233700 | -3.72019800 |
| H | -2.44101000 | -0.54098500 | -2.79489600 |
| C | -3.94372400 | -4.31557700 | -3.66826900 |
| H | -3.47939800 | -4.97476300 | -4.41013000 |
| H | -3.82372200 | -4.78851200 | -2.68738000 |
| H | -5.01565100 | -4.26495600 | -3.89708400 |

|   |             |             |             |
|---|-------------|-------------|-------------|
| C | -3.43914800 | -2.35217400 | -5.14557500 |
| H | -2.99706400 | -1.35489800 | -5.23012500 |
| H | -2.93698700 | -3.00650500 | -5.86764500 |
| H | -4.49499600 | -2.28007900 | -5.43532000 |
| C | -1.78754000 | -3.06314900 | -3.38781600 |
| H | -1.63054600 | -3.43281100 | -2.37287100 |
| H | -1.32089200 | -3.76866800 | -4.08369500 |
| H | -1.25327600 | -2.11074300 | -3.48948400 |
| N | -5.30901800 | -2.95050300 | -0.80591600 |
| C | -6.61438000 | -2.78450500 | -1.48755200 |
| C | -5.44811800 | -3.49900400 | 0.57933800  |
| C | -7.64538000 | -2.99981500 | -0.37355700 |
| H | -6.68700800 | -1.78862400 | -1.92841000 |
| C | -6.93404700 | -3.96541300 | 0.57512700  |
| H | -7.85976600 | -2.05242300 | 0.13136800  |
| H | -7.35040300 | -3.97665000 | 1.58570800  |
| H | -6.98385100 | -4.98727100 | 0.17741000  |
| H | -8.58957600 | -3.39539900 | -0.75942100 |
| H | -6.73025300 | -3.53716700 | -2.27845100 |
| C | -3.82399800 | 2.77627300  | -1.52038500 |
| C | -4.99479800 | 2.91943400  | -0.75395100 |
| C | -2.95962500 | 3.88056600  | -1.64290700 |
| C | -5.25568800 | 4.12604200  | -0.10600300 |
| H | -5.68623500 | 2.09173900  | -0.68741000 |
| C | -3.25331500 | 5.08219900  | -1.00142900 |
| H | -2.06540400 | 3.79208200  | -2.25295300 |
| C | -4.39898300 | 5.22045500  | -0.21627100 |
| H | -4.62342900 | 6.15567400  | 0.27963700  |
| O | 2.84889800  | 3.42403800  | -0.05491000 |
| C | 3.75174100  | 3.54808500  | -0.89643700 |
| C | 3.43309300  | 3.37994900  | -2.40630500 |
| H | 4.36802000  | 3.34894900  | -2.96730300 |
| N | 2.77187500  | 2.10162200  | -2.62292200 |
| C | 3.48604600  | 0.94808800  | -2.46959500 |
| N | 2.74256000  | -0.20702000 | -2.66580400 |
| H | 1.76049300  | -0.07649000 | -2.92233300 |
| C | 2.60646800  | 4.56981100  | -3.00239200 |
| H | 1.75977500  | 2.05022800  | -2.72731000 |
| C | 3.39074800  | 5.87800500  | -2.77441100 |
| H | 2.86117600  | 6.71540200  | -3.24208700 |
| H | 3.49884800  | 6.11118400  | -1.70932600 |
| H | 4.39247000  | 5.83140500  | -3.21946000 |
| C | 2.46212100  | 4.33873300  | -4.52176200 |
| H | 1.88873500  | 3.43386000  | -4.74379800 |
| H | 1.93966900  | 5.18669700  | -4.97956100 |
| H | 3.44206900  | 4.24657800  | -5.00633000 |
| C | 1.20652800  | 4.71070500  | -2.37497100 |
| H | 1.26162900  | 4.89683600  | -1.30025000 |
| H | 0.67943900  | 5.55202600  | -2.83775900 |
| H | 0.59176700  | 3.81754800  | -2.53680900 |
| N | 5.02782300  | 3.83717500  | -0.52987700 |
| C | 6.21003600  | 3.78298900  | -1.42298800 |
| C | 5.39933400  | 4.06698200  | 0.90265700  |
| C | 7.39685900  | 3.68936000  | -0.45805600 |
| H | 6.14316500  | 2.91497500  | -2.08060000 |
| C | 6.90280800  | 4.45249600  | 0.77126800  |
| H | 7.59753300  | 2.64281000  | -0.20705300 |
| H | 7.45407900  | 4.21906300  | 1.68567600  |
| H | 6.97905700  | 5.53355800  | 0.59710500  |
| H | 8.30937600  | 4.11285500  | -0.88784100 |
| H | 6.27088700  | 4.69499200  | -2.03097500 |

|   |             |             |             |
|---|-------------|-------------|-------------|
| C | 3.14336600  | -1.51601300 | -2.38663000 |
| C | 4.33682000  | -1.83738300 | -1.71752100 |
| C | 2.28342700  | -2.56094600 | -2.76847800 |
| C | 4.61932600  | -3.16623700 | -1.40427900 |
| H | 5.02848000  | -1.04880900 | -1.45993800 |
| C | 2.59928600  | -3.88383000 | -2.46518400 |
| H | 1.36884900  | -2.33100200 | -3.30661700 |
| C | 3.76464300  | -4.20510300 | -1.76809700 |
| H | 3.99324500  | -5.23120400 | -1.51399800 |
| C | -4.52905400 | -4.71466100 | 0.79856000  |
| H | -3.48859100 | -4.41733900 | 0.92550600  |
| H | -4.84966400 | -5.28034100 | 1.67968600  |
| H | -4.60195700 | -5.38410300 | -0.06469000 |
| C | 4.61490800  | 5.25123300  | 1.49662600  |
| H | 3.57728100  | 4.98835500  | 1.70054500  |
| H | 5.08522700  | 5.59372700  | 2.42415000  |
| H | 4.63411500  | 6.08890600  | 0.79189500  |
| O | 4.69139700  | 0.94958300  | -2.18723600 |
| O | -5.34286400 | 0.29563700  | -1.83652500 |
| C | -5.24747400 | -2.40000100 | 1.64213900  |
| C | -4.94642500 | -2.72420800 | 2.95260600  |
| C | -5.46275900 | -1.02856300 | 1.32197600  |
| C | -4.85953900 | -1.73855800 | 3.97281500  |
| H | -4.77417000 | -3.75750200 | 3.24055300  |
| C | -5.39759100 | -0.04920700 | 2.28731100  |
| H | -5.66269400 | -0.74026200 | 0.29585900  |
| C | -4.54979600 | -2.06832000 | 5.32071400  |
| C | -5.10056200 | -0.36732100 | 3.63870900  |
| H | -5.58166500 | 0.98952300  | 2.02233900  |
| C | -4.48505400 | -1.09179300 | 6.28941300  |
| H | -4.36675800 | -3.10967100 | 5.57640300  |
| C | -5.02935000 | 0.61784200  | 4.66105200  |
| C | -4.72839100 | 0.26459500  | 5.95755500  |
| H | -4.24973700 | -1.35909100 | 7.31618000  |
| H | -5.22508900 | 1.65535500  | 4.39891500  |
| H | -4.68067500 | 1.02427300  | 6.73320100  |
| C | 5.25997900  | 2.77911800  | 1.73847300  |
| C | 5.18845300  | 2.83524800  | 3.11887300  |
| C | 5.30151800  | 1.49693500  | 1.11897900  |
| C | 5.16423900  | 1.66255300  | 3.92196800  |
| H | 5.15991500  | 3.79248700  | 3.63223300  |
| C | 5.29127100  | 0.34131000  | 1.86755400  |
| H | 5.32519300  | 1.42242600  | 0.03723400  |
| C | 5.08933500  | 1.71686900  | 5.34080300  |
| C | 5.22645900  | 0.38212700  | 3.28509400  |
| H | 5.34398500  | -0.62689300 | 1.37472800  |
| C | 5.08052000  | 0.56246200  | 6.09156100  |
| H | 5.04411300  | 2.68929700  | 5.82650600  |
| C | 5.22150400  | -0.79082800 | 4.08720600  |
| C | 5.14912900  | -0.70425200 | 5.45954100  |
| H | 5.02588600  | 0.61884700  | 7.17547400  |
| H | 5.28616400  | -1.75886900 | 3.59523300  |
| H | 5.14908100  | -1.60709000 | 6.06417800  |
| C | 5.83925200  | -3.45067000 | -0.57227500 |
| C | 1.63958500  | -4.97353100 | -2.86575900 |
| C | -6.46833500 | 4.19989100  | 0.78329800  |
| C | -2.28483000 | 6.22646700  | -1.13076900 |
| F | -7.55458200 | 3.64393300  | 0.21028700  |
| F | -6.25969900 | 3.52632800  | 1.95009900  |
| F | -6.78509100 | 5.46735400  | 1.11949200  |
| F | -2.82818100 | 7.40426100  | -0.76353300 |

|    |             |             |             |
|----|-------------|-------------|-------------|
| F  | -1.82956800 | 6.36376400  | -2.39562400 |
| F  | -1.18593300 | 6.04133800  | -0.34705200 |
| F  | 5.61235800  | -3.14940200 | 0.74600500  |
| F  | 6.90190800  | -2.71049600 | -0.94583100 |
| F  | 6.20478800  | -4.74619600 | -0.60975100 |
| F  | 1.15381900  | -4.77610800 | -4.11467500 |
| F  | 2.21288200  | -6.19302100 | -2.84302800 |
| F  | 0.56319800  | -5.02762500 | -2.04124900 |
| Cl | -0.36681300 | 0.93637300  | -2.98386200 |
| C  | 0.45079900  | 1.37780300  | 0.21840100  |
| H  | 1.15816300  | 2.18508300  | 0.03403300  |
| H  | -0.50151600 | 1.47482700  | -0.28574500 |
| C  | 0.94500500  | 0.09303200  | 0.53931700  |
| H  | 2.02081000  | -0.05370900 | 0.50129000  |
| C  | 0.11020600  | -0.93025400 | 0.92263900  |
| C  | -1.32195100 | -0.60093700 | 1.21681000  |
| H  | -1.88679000 | -1.47826600 | 1.52646400  |
| H  | -1.83172800 | -0.20035300 | 0.33399800  |
| C  | -1.38062200 | 0.46492100  | 2.37730500  |
| H  | -2.42412800 | 0.51139500  | 2.70872900  |
| H  | -0.79168300 | 0.10189600  | 3.22365400  |
| C  | -0.97031100 | 1.84117200  | 1.95773700  |
| H  | -1.71638400 | 2.37831300  | 1.37260600  |
| C  | 0.12854900  | 2.57135500  | 2.35174600  |
| C  | 0.24155200  | 4.02679100  | 1.99164300  |
| H  | -0.57104800 | 4.36787900  | 1.34665600  |
| H  | 0.22736700  | 4.62826300  | 2.91121200  |
| H  | 1.19565900  | 4.22297500  | 1.49035300  |
| C  | 1.22593700  | 2.03385600  | 3.22461800  |
| H  | 1.19103300  | 0.95105800  | 3.35228200  |
| H  | 2.20421800  | 2.30927200  | 2.81527900  |
| H  | 1.15561300  | 2.49540400  | 4.21907200  |
| C  | 0.62444700  | -2.28868600 | 1.16064900  |
| C  | -0.20317600 | -3.39884800 | 0.89737300  |
| C  | 1.95205600  | -2.51859300 | 1.57351700  |
| C  | 0.29562500  | -4.69191600 | 1.01221700  |
| H  | -1.21497400 | -3.24618700 | 0.53523600  |
| C  | 2.44549800  | -3.81188500 | 1.69564700  |
| H  | 2.59919800  | -1.68306200 | 1.82016100  |
| C  | 1.61864800  | -4.90135300 | 1.40688400  |
| H  | -0.33918200 | -5.53938700 | 0.77723400  |
| H  | 3.47438000  | -3.97408700 | 1.99520800  |
| C  | 2.17513200  | -6.29929600 | 1.43104400  |
| F  | 2.61402900  | -6.67458900 | 0.20266600  |
| F  | 3.22200900  | -6.41509900 | 2.27514700  |
| F  | 1.24581900  | -7.20507900 | 1.80473400  |

#### TS-R-5:

Imaginary frequency: -177.75 cm<sup>-1</sup>

E[B3LYP/6-31G(d)]: -5531.670823 Hartree

E[PCM(CyH)-B3LYP-D3(BJ)/6-311+G(d,p)]: -5533.636199 Hartree

Free energy correction: 1.305809 Hartree

Free energy correction – Grimme quasi-RRHO: 1.300088 Hartree

Free energy correction – Truhlar quasi-RRHO: 1.307738 Hartree

|   |             |             |             |
|---|-------------|-------------|-------------|
| O | -1.94918400 | -3.07550300 | 0.09117300  |
| C | -2.87249900 | -3.60675700 | -0.53744800 |
| C | -3.04090800 | -3.31441200 | -2.05146500 |
| H | -4.02645100 | -3.64469600 | -2.37950100 |

|   |             |             |             |
|---|-------------|-------------|-------------|
| N | -3.00348000 | -1.87633100 | -2.26915800 |
| C | -4.07841400 | -1.11381100 | -1.91098200 |
| N | -3.86432100 | 0.24976100  | -2.09200500 |
| H | -2.93121900 | 0.52018900  | -2.41688300 |
| C | -1.99522800 | -4.05456300 | -2.95444400 |
| H | -2.10487800 | -1.41590600 | -2.39995800 |
| C | -2.11628300 | -5.57450000 | -2.72547800 |
| H | -1.41398500 | -6.10512500 | -3.37779800 |
| H | -1.88163300 | -5.85559000 | -1.69285800 |
| H | -3.12360100 | -5.93922700 | -2.96098200 |
| C | -2.33432200 | -3.75071300 | -4.42884100 |
| H | -2.24391000 | -2.68399300 | -4.65325100 |
| H | -1.64892400 | -4.29425100 | -5.08944300 |
| H | -3.35698800 | -4.06241200 | -4.67545300 |
| C | -0.54531600 | -3.62181500 | -2.66687200 |
| H | -0.25447700 | -3.83443600 | -1.63563500 |
| H | 0.13634600  | -4.16423100 | -3.32986800 |
| H | -0.39162400 | -2.55136800 | -2.84741800 |
| N | -3.76054500 | -4.45098800 | 0.05704600  |
| C | -5.00588800 | -4.95679900 | -0.57005500 |
| C | -3.65055700 | -4.83440100 | 1.49739000  |
| C | -5.80399400 | -5.54394600 | 0.60093400  |
| H | -5.53750500 | -4.14297500 | -1.06889500 |
| C | -4.71373000 | -5.96644600 | 1.58611400  |
| H | -6.44407400 | -4.77611600 | 1.04668700  |
| H | -5.07441200 | -6.09857800 | 2.60985500  |
| H | -4.25592000 | -6.91062400 | 1.26347700  |
| H | -6.44300200 | -6.37377100 | 0.28521800  |
| H | -4.77143700 | -5.73290200 | -1.30874000 |
| C | -4.72158200 | 1.28906800  | -1.74029500 |
| C | -6.06959600 | 1.10435100  | -1.38244200 |
| C | -4.20160200 | 2.59621000  | -1.75600300 |
| C | -6.84644100 | 2.20395300  | -1.02000800 |
| H | -6.48538100 | 0.10684400  | -1.39277800 |
| C | -5.00102400 | 3.67977800  | -1.39515200 |
| H | -3.16954800 | 2.75615200  | -2.05603300 |
| C | -6.33111500 | 3.49980000  | -1.01543400 |
| H | -6.94787100 | 4.34330100  | -0.73537400 |
| O | 1.50783500  | 3.75717300  | 0.25684800  |
| C | 2.27122800  | 4.29740200  | -0.55691400 |
| C | 2.08770800  | 4.03630300  | -2.07516300 |
| H | 2.98924900  | 4.34689000  | -2.60543600 |
| N | 1.94057400  | 2.61045100  | -2.30569000 |
| C | 3.02022600  | 1.79258600  | -2.14045500 |
| N | 2.74197600  | 0.45293200  | -2.38608600 |
| H | 1.77606500  | 0.23519200  | -2.63661000 |
| C | 0.89975500  | 4.84412600  | -2.70674300 |
| H | 1.01486900  | 2.19853300  | -2.41437500 |
| C | 1.18348700  | 6.35342400  | -2.56662700 |
| H | 0.36547300  | 6.92716000  | -3.01616800 |
| H | 1.26559500  | 6.66307800  | -1.51888200 |
| H | 2.10761900  | 6.63927400  | -3.08344300 |
| C | 0.82544300  | 4.50101300  | -4.21022100 |
| H | 0.55540200  | 3.45491100  | -4.37962100 |
| H | 0.06563900  | 5.12517900  | -4.69498500 |
| H | 1.78384600  | 4.68950500  | -4.70956200 |
| C | -0.45554000 | 4.53034000  | -2.04556000 |
| H | -0.46064800 | 4.80115000  | -0.98691800 |
| H | -1.24731600 | 5.09881000  | -2.54461000 |
| H | -0.71298300 | 3.46846800  | -2.12769800 |
| N | 3.26544200  | 5.14053600  | -0.16729800 |



|   |             |             |             |
|---|-------------|-------------|-------------|
| C | 4.36598400  | 5.61248500  | -1.04359800 |
| C | 3.44710600  | 5.56486600  | 1.25472100  |
| C | 5.39037200  | 6.20817400  | -0.07019100 |
| H | 4.77151600  | 4.77749100  | -1.61988200 |
| C | 4.52324300  | 6.67806700  | 1.09801800  |
| H | 6.09305700  | 5.43759300  | 0.26171200  |
| H | 5.08106000  | 6.82923500  | 2.02614800  |
| H | 4.02494400  | 7.62273100  | 0.84398500  |
| H | 5.96792100  | 7.01625600  | -0.52841400 |
| H | 3.99966100  | 6.37842100  | -1.73718300 |
| C | 3.60923700  | -0.63288500 | -2.25734000 |
| C | 4.93392300  | -0.51793100 | -1.79479600 |
| C | 3.12330700  | -1.90515900 | -2.60029800 |
| C | 5.71532400  | -1.66053300 | -1.64889700 |
| H | 5.32548600  | 0.46104400  | -1.56576200 |
| C | 3.93163800  | -3.03347000 | -2.46097800 |
| H | 2.11119500  | -2.00864700 | -2.97970200 |
| C | 5.23330900  | -2.92931600 | -1.97645800 |
| H | 5.85022800  | -3.81081900 | -1.85500600 |
| C | -2.25872200 | -5.40216900 | 1.83551100  |
| H | -1.51313900 | -4.61530100 | 1.94308500  |
| H | -2.30245600 | -5.98075200 | 2.76412900  |
| H | -1.94051300 | -6.08442300 | 1.04037500  |
| C | 2.15493100  | 6.17165100  | 1.83280500  |
| H | 1.42496800  | 5.40542200  | 2.09088900  |
| H | 2.38053200  | 6.76318700  | 2.72598400  |
| H | 1.70807700  | 6.84831300  | 1.09724400  |
| O | 4.13593800  | 2.22231600  | -1.82027600 |
| O | -5.13531900 | -1.59389000 | -1.48568600 |
| C | -4.05797200 | -3.67572400 | 2.42593100  |
| C | -4.78077500 | -2.59006300 | 1.97169500  |
| C | -3.77106600 | -3.75889000 | 3.81975800  |
| C | -5.25642400 | -1.58404900 | 2.85733200  |
| H | -5.00100400 | -2.47589900 | 0.91441700  |
| C | -4.19747900 | -2.79203700 | 4.70010400  |
| H | -3.20491900 | -4.60214800 | 4.20303100  |
| C | -6.04359500 | -0.49252000 | 2.39721300  |
| C | -4.95858000 | -1.67941400 | 4.25433900  |
| H | -3.96261200 | -2.87869000 | 5.75879200  |
| C | -6.51113100 | 0.45979200  | 3.27655100  |
| H | -6.28195700 | -0.42691600 | 1.33939100  |
| C | -5.44405800 | -0.67505900 | 5.13404800  |
| C | -6.20438500 | 0.37018000  | 4.65732900  |
| H | -7.12433800 | 1.27609200  | 2.90718800  |
| H | -5.21460600 | -0.75198400 | 6.19468000  |
| H | -6.58047400 | 1.12633500  | 5.34165500  |
| C | 4.01318300  | 4.42971800  | 2.12599200  |
| C | 4.64511600  | 3.33058800  | 1.57733900  |
| C | 3.98496900  | 4.55220100  | 3.54613400  |
| C | 5.27880100  | 2.35023800  | 2.38957900  |
| H | 4.66022000  | 3.18273100  | 0.50131400  |
| C | 4.56837900  | 3.60916300  | 4.36034700  |
| H | 3.49805400  | 5.40791900  | 4.00344900  |
| C | 5.97155100  | 1.24403100  | 1.82502200  |
| C | 5.24023400  | 2.48413400  | 3.81406000  |
| H | 4.53032400  | 3.72534000  | 5.44131500  |
| C | 6.59093700  | 0.31253700  | 2.63016300  |
| H | 6.02276300  | 1.15415300  | 0.74398900  |
| C | 5.87956900  | 1.50256900  | 4.61824900  |
| C | 6.53977800  | 0.44077600  | 4.04079500  |
| H | 7.12328000  | -0.51874200 | 2.17788900  |

|    |             |             |             |
|----|-------------|-------------|-------------|
| H  | 5.84563600  | 1.60856900  | 5.70032100  |
| H  | 7.03057000  | -0.30073400 | 4.66539800  |
| C  | 7.09964300  | -1.55163100 | -1.07066300 |
| C  | 3.36023800  | -4.38542600 | -2.79966200 |
| C  | -8.26460900 | 1.95313500  | -0.58010600 |
| C  | -4.38579800 | 5.05249800  | -1.39505000 |
| F  | -8.90413200 | 1.09650900  | -1.40226500 |
| F  | -8.30513800 | 1.39749300  | 0.66151000  |
| F  | -8.99339800 | 3.08749600  | -0.52375200 |
| F  | -5.27198900 | 6.01870200  | -1.08511500 |
| F  | -3.84746000 | 5.36536600  | -2.59538900 |
| F  | -3.37129800 | 5.14096100  | -0.48923900 |
| F  | 7.15810200  | -2.10746800 | 0.17603200  |
| F  | 7.51432200  | -0.27336600 | -0.93932200 |
| F  | 8.01598400  | -2.20366100 | -1.81527500 |
| F  | 2.64679400  | -4.34999500 | -3.95214000 |
| F  | 4.31627800  | -5.32323600 | -2.94772900 |
| F  | 2.51191400  | -4.82969100 | -1.83947600 |
| C  | -0.68899300 | 0.84420600  | 0.42262600  |
| H  | -1.69560300 | 0.83475000  | 0.02269400  |
| H  | -0.12581800 | 1.75509000  | 0.24352100  |
| C  | -0.01349100 | -0.40054200 | 0.57150600  |
| H  | -0.51748200 | -1.28435800 | 0.19051300  |
| C  | 1.18120600  | -0.47014000 | 1.24322300  |
| C  | 1.64740200  | 0.78661400  | 1.92372300  |
| H  | 2.58600900  | 0.64472300  | 2.46010800  |
| H  | 1.81932400  | 1.57628200  | 1.18273600  |
| C  | 0.59282800  | 1.34951200  | 2.94817100  |
| H  | 0.86455900  | 2.38995800  | 3.14377800  |
| H  | 0.70381800  | 0.80545900  | 3.89364200  |
| C  | -0.85971300 | 1.22884800  | 2.54446700  |
| H  | -1.32667500 | 0.27531300  | 2.77849600  |
| C  | -1.73713400 | 2.26618900  | 2.29778500  |
| C  | -3.21223600 | 2.01049700  | 2.24263700  |
| H  | -3.47164400 | 0.95941200  | 2.38449800  |
| H  | -3.63426700 | 2.36141700  | 1.29215300  |
| H  | -3.71233800 | 2.59355600  | 3.02893400  |
| C  | -1.29834100 | 3.68188700  | 2.07385500  |
| H  | -0.27455000 | 3.76157500  | 1.70170200  |
| H  | -1.36180500 | 4.22801400  | 3.02753400  |
| H  | -1.96985200 | 4.18969800  | 1.37432400  |
| Cl | -0.64587100 | 0.55523000  | -2.71658900 |
| C  | 1.92913700  | -1.73311400 | 1.35116800  |
| C  | 3.32375900  | -1.72414000 | 1.55225100  |
| C  | 1.28612300  | -2.97940000 | 1.18963200  |
| C  | 4.05491000  | -2.90690200 | 1.54911200  |
| H  | 3.85860800  | -0.78765300 | 1.66448100  |
| C  | 2.01624100  | -4.16125000 | 1.20168600  |
| H  | 0.21102500  | -3.02758700 | 1.05356500  |
| C  | 3.40342500  | -4.12881100 | 1.36894800  |
| H  | 5.13313900  | -2.87440600 | 1.65810800  |
| H  | 1.50944400  | -5.11127800 | 1.07325200  |
| C  | 4.21212500  | -5.39364000 | 1.27440300  |
| F  | 4.70716900  | -5.57428900 | 0.02441500  |
| F  | 3.48022900  | -6.48926900 | 1.56907400  |
| F  | 5.27296400  | -5.37461900 | 2.11191300  |

**TS-R-6:**

Imaginary frequency: -184.25 cm<sup>-1</sup>

E[B3LYP/6-31G(d)]: -5531.668694 Hartree  
 E[PCM(CyH)-B3LYP-D3(BJ)/6-311+G(d,p)]: -5533.632704 Hartree  
 Free energy correction: 1.302974 Hartree  
 Free energy correction – Grimme quasi-RRHO: 1.298892 Hartree  
 Free energy correction – Truhlar quasi-RRHO: 1.307978 Hartree

|   |             |             |             |
|---|-------------|-------------|-------------|
| O | 1.59539700  | 3.67177100  | 0.58684800  |
| C | 2.35027500  | 4.28918700  | -0.18021400 |
| C | 2.11064000  | 4.22119200  | -1.71195900 |
| H | 2.99401300  | 4.59302500  | -2.23185300 |
| N | 1.95617800  | 2.83173700  | -2.10755600 |
| C | 3.04671100  | 2.01041200  | -2.08272800 |
| N | 2.75630500  | 0.68841500  | -2.39077700 |
| H | 1.76860600  | 0.46241300  | -2.52399800 |
| C | 0.90781400  | 5.09897500  | -2.20107600 |
| H | 1.02735900  | 2.41907500  | -2.17793300 |
| C | 1.19561900  | 6.57602000  | -1.86382500 |
| H | 0.37070700  | 7.20522800  | -2.21610500 |
| H | 1.29761000  | 6.74045200  | -0.78513400 |
| H | 2.11108600  | 6.93005000  | -2.35317800 |
| C | 0.80028200  | 4.95819300  | -3.73444300 |
| H | 0.54199700  | 3.93835400  | -4.03326900 |
| H | 0.02047000  | 5.62801700  | -4.11533000 |
| H | 1.74352200  | 5.22624000  | -4.22617200 |
| C | -0.43240400 | 4.69518500  | -1.55874900 |
| H | -0.41226200 | 4.82392400  | -0.47389100 |
| H | -1.23529400 | 5.32116700  | -1.96130800 |
| H | -0.69189000 | 3.65235400  | -1.77375800 |
| N | 3.39170200  | 5.03527000  | 0.27523100  |
| C | 4.46047900  | 5.60912100  | -0.58062700 |
| C | 3.67204000  | 5.21783300  | 1.73286700  |
| C | 5.55641300  | 6.01906700  | 0.41058900  |
| H | 4.80665900  | 4.86357200  | -1.29988900 |
| C | 4.77333300  | 6.31572100  | 1.68947700  |
| H | 6.25142900  | 5.18937000  | 0.57261000  |
| H | 5.38768200  | 6.30219700  | 2.59384400  |
| H | 4.29283400  | 7.30045600  | 1.62044600  |
| H | 6.13277600  | 6.87645800  | 0.05117700  |
| H | 4.08183200  | 6.48221000  | -1.12517000 |
| C | 3.65320100  | -0.38101500 | -2.41594900 |
| C | 5.04997400  | -0.22059300 | -2.41722900 |
| C | 3.12376500  | -1.68203200 | -2.46106300 |
| C | 5.87584100  | -1.34378800 | -2.43314300 |
| H | 5.46822800  | 0.77531300  | -2.40136400 |
| C | 3.96985200  | -2.78901000 | -2.49570400 |
| H | 2.04674200  | -1.82145800 | -2.46039700 |
| C | 5.35585500  | -2.63635900 | -2.47454000 |
| H | 6.00868400  | -3.49890300 | -2.49191600 |
| O | -1.96526400 | -3.03935500 | -0.10947300 |
| C | -2.88201000 | -3.53620300 | -0.77520300 |
| C | -3.01626500 | -3.18858500 | -2.28043700 |
| H | -3.99199300 | -3.50937300 | -2.64360400 |
| N | -2.98459700 | -1.74225800 | -2.44183300 |
| C | -4.08727500 | -1.00628900 | -2.10738000 |
| N | -3.87712000 | 0.36555400  | -2.20651700 |
| H | -2.92484100 | 0.65911100  | -2.44318600 |
| C | -1.94712900 | -3.88886300 | -3.18695500 |
| H | -2.08260300 | -1.27071400 | -2.46729900 |
| C | -2.02544200 | -5.41388500 | -2.97442400 |
| H | -1.32006500 | -5.91879700 | -3.64365800 |
| H | -1.76671200 | -5.69983400 | -1.94892800 |

|   |             |             |             |
|---|-------------|-------------|-------------|
| H | -3.02658100 | -5.80251600 | -3.19814400 |
| C | -2.28938900 | -3.57593300 | -4.65828500 |
| H | -2.25418700 | -2.50116000 | -4.85908400 |
| H | -1.57094400 | -4.06878700 | -5.32352800 |
| H | -3.29208800 | -3.93633500 | -4.92033900 |
| C | -0.51255400 | -3.41631300 | -2.88699200 |
| H | -0.23439500 | -3.60470900 | -1.84775200 |
| H | 0.19371200  | -3.95218800 | -3.52961000 |
| H | -0.38370300 | -2.34587000 | -3.08696300 |
| N | -3.79594400 | -4.38472000 | -0.22763800 |
| C | -5.02736500 | -4.86419900 | -0.90143500 |
| C | -3.72966200 | -4.80213100 | 1.20598000  |
| C | -5.87156400 | -5.45318600 | 0.23550700  |
| H | -5.53117800 | -4.03675200 | -1.40618800 |
| C | -4.82039700 | -5.91105200 | 1.24672700  |
| H | -6.51105000 | -4.67994400 | 0.67269800  |
| H | -5.21384800 | -6.04882400 | 2.25760700  |
| H | -4.37365100 | -6.86078500 | 0.92497300  |
| H | -6.51587300 | -6.26607700 | -0.11194900 |
| H | -4.77977100 | -5.63477100 | -1.64205400 |
| C | -4.75325600 | 1.37530500  | -1.81752500 |
| C | -6.11985200 | 1.16682900  | -1.55510300 |
| C | -4.23319600 | 2.67557800  | -1.68993200 |
| C | -6.91529800 | 2.23387500  | -1.14017000 |
| H | -6.53450800 | 0.17607800  | -1.67416700 |
| C | -5.05076400 | 3.72640000  | -1.27660200 |
| H | -3.18479800 | 2.85463800  | -1.91282500 |
| C | -6.39993600 | 3.52122600  | -0.98975000 |
| H | -7.03026400 | 4.33932300  | -0.66725000 |
| C | 2.44026300  | 5.75155500  | 2.48796300  |
| H | 1.70861300  | 4.96763100  | 2.67875500  |
| H | 2.74450300  | 6.19405700  | 3.44216300  |
| H | 1.96328700  | 6.54113000  | 1.89820900  |
| C | -2.36122900 | -5.41284900 | 1.56393300  |
| H | -1.60016700 | -4.64844900 | 1.71529300  |
| H | -2.44382200 | -6.01742400 | 2.47327300  |
| H | -2.03816500 | -6.07880400 | 0.75713700  |
| O | -5.16278600 | -1.51418900 | -1.77076700 |
| O | 4.18362200  | 2.42464500  | -1.82012200 |
| C | 4.24983300  | 3.93948000  | 2.36685700  |
| C | 4.78832600  | 2.92144500  | 1.60416900  |
| C | 4.32929700  | 3.83343000  | 3.78660700  |
| C | 5.43080500  | 1.80057200  | 2.19931000  |
| H | 4.72688800  | 2.94903500  | 0.52027700  |
| C | 4.92640500  | 2.75302600  | 4.39386400  |
| H | 3.91705200  | 4.62136300  | 4.40958500  |
| C | 6.02505000  | 0.77593200  | 1.41271000  |
| C | 5.50419800  | 1.70712700  | 3.62604500  |
| H | 4.97399500  | 2.69670100  | 5.47924800  |
| C | 6.66607100  | -0.28801700 | 2.00980600  |
| H | 5.97629200  | 0.85001900  | 0.33034900  |
| C | 6.15835700  | 0.59056100  | 4.21235800  |
| C | 6.72981200  | -0.38348500 | 3.42283300  |
| H | 7.12999000  | -1.04963600 | 1.39051000  |
| H | 6.21119300  | 0.52316200  | 5.29674600  |
| H | 7.24009500  | -1.22603200 | 3.88225400  |
| C | -4.13122000 | -3.65181000 | 2.14750600  |
| C | -4.85265400 | -2.56081900 | 1.70328500  |
| C | -3.84311200 | -3.74659000 | 3.54019500  |
| C | -5.32737000 | -1.56225800 | 2.59734300  |
| H | -5.07214300 | -2.43635500 | 0.64699700  |

|    |             |             |             |
|----|-------------|-------------|-------------|
| C  | -4.26757800 | -2.78621200 | 4.42887400  |
| H  | -3.27699500 | -4.59302900 | 3.91608400  |
| C  | -6.11650700 | -0.46806400 | 2.14698500  |
| C  | -5.02881600 | -1.66960000 | 3.99336500  |
| H  | -4.03169000 | -2.88199900 | 5.48656200  |
| C  | -6.58644500 | 0.47505400  | 3.03479200  |
| H  | -6.35690100 | -0.39440900 | 1.09020200  |
| C  | -5.51534400 | -0.67335000 | 4.88187600  |
| C  | -6.27852100 | 0.37421300  | 4.41464400  |
| H  | -7.20344700 | 1.29175800  | 2.67263800  |
| H  | -5.28594000 | -0.75937900 | 5.94184000  |
| H  | -6.65690600 | 1.12289500  | 5.10592000  |
| Cl | -0.62386600 | 0.75248300  | -2.54427800 |
| C  | -8.35239900 | 1.95480400  | -0.78813500 |
| C  | -4.42906500 | 5.08321300  | -1.09480100 |
| C  | 7.36297800  | -1.13096700 | -2.34760300 |
| C  | 3.36122600  | -4.16374300 | -2.57519400 |
| F  | 7.77728400  | -0.11992600 | -3.13985900 |
| F  | 7.74395400  | -0.80542200 | -1.08107200 |
| F  | 8.06199700  | -2.23236800 | -2.69233400 |
| F  | 4.27512700  | -5.14121900 | -2.40693100 |
| F  | 2.76578000  | -4.37781900 | -3.77486800 |
| F  | 2.40302700  | -4.34249200 | -1.63448000 |
| F  | -8.45425000 | 1.37359800  | 0.43849400  |
| F  | -8.93369400 | 1.10853200  | -1.66201200 |
| F  | -9.09809000 | 3.07916200  | -0.74866100 |
| F  | -3.79648400 | 5.50729200  | -2.21180800 |
| F  | -5.32747200 | 6.02732900  | -0.75525600 |
| F  | -3.48587500 | 5.06185000  | -0.10869500 |
| C  | -0.66628700 | 0.87753400  | 0.57354500  |
| H  | -1.64636500 | 0.91198700  | 0.11488300  |
| H  | -0.06984800 | 1.77813200  | 0.46076600  |
| C  | -0.02876600 | -0.39316200 | 0.70047800  |
| H  | -0.52917700 | -1.24225600 | 0.24314000  |
| C  | 1.10927700  | -0.53022200 | 1.45374200  |
| C  | 1.55147900  | 0.68233600  | 2.22608100  |
| H  | 2.44998900  | 0.49673800  | 2.81510900  |
| H  | 1.78204800  | 1.50818700  | 1.54303000  |
| C  | 0.43522700  | 1.19186800  | 3.20898200  |
| H  | 0.72162700  | 2.19869300  | 3.52483300  |
| H  | 0.44670400  | 0.56040100  | 4.10526000  |
| C  | -0.98132800 | 1.17215000  | 2.67475300  |
| H  | -1.51917000 | 0.23760500  | 2.81409000  |
| C  | -1.77693300 | 2.27879100  | 2.44496800  |
| C  | -3.25275500 | 2.12543600  | 2.24944000  |
| H  | -3.58295000 | 1.08464400  | 2.25476300  |
| H  | -3.57392600 | 2.60815300  | 1.31809800  |
| H  | -3.77942600 | 2.65232800  | 3.05836300  |
| C  | -1.23576800 | 3.67555700  | 2.37925400  |
| H  | -0.20920000 | 3.71687000  | 2.00599400  |
| H  | -1.24705000 | 4.11043400  | 3.39040700  |
| H  | -1.86715900 | 4.30955100  | 1.75014200  |
| C  | 1.79578500  | -1.82504400 | 1.60067500  |
| C  | 3.15412300  | -1.88100700 | 1.97086700  |
| C  | 1.12360300  | -3.04090400 | 1.34936600  |
| C  | 3.81584600  | -3.09863600 | 2.08593800  |
| H  | 3.72034200  | -0.97052700 | 2.13012000  |
| C  | 1.78403700  | -4.25658900 | 1.47419800  |
| H  | 0.07713500  | -3.04031400 | 1.06387900  |
| C  | 3.13147900  | -4.29151400 | 1.84514500  |
| H  | 4.86722200  | -3.11612800 | 2.35195600  |

|   |            |             |            |
|---|------------|-------------|------------|
| H | 1.25385200 | -5.18175300 | 1.27523700 |
| C | 3.82717200 | -5.61159400 | 2.04003400 |
| F | 3.31058400 | -6.57679200 | 1.25022100 |
| F | 3.71210400 | -6.04677000 | 3.31861200 |
| F | 5.14902400 | -5.52821800 | 1.77349900 |

**TS-R-7:**

Imaginary frequency: -179.01 cm<sup>-1</sup>

E[B3LYP/6-31G(d)]: -5531.668250 Hartree

E[PCM(CyH)-B3LYP-D3(BJ)/6-311+G(d,p)]: -5533.633607 Hartree

Free energy correction: 1.306538 Hartree

Free energy correction – Grimme quasi-RRHO: 1.300534 Hartree

Free energy correction – Truhlar quasi-RRHO: 1.308087 Hartree

|   |             |             |             |
|---|-------------|-------------|-------------|
| O | 1.66383500  | 3.62705400  | 0.07492300  |
| C | 2.44926400  | 4.17394900  | -0.71466500 |
| C | 2.21861900  | 4.04085000  | -2.24461400 |
| H | 3.12064700  | 4.35084200  | -2.77296500 |
| N | 2.01048200  | 2.63954100  | -2.57157800 |
| C | 3.06040100  | 1.77628400  | -2.44141200 |
| N | 2.72847900  | 0.44753700  | -2.67155700 |
| H | 1.75409600  | 0.26288800  | -2.91683900 |
| C | 1.05889500  | 4.94249000  | -2.78822400 |
| H | 1.06541600  | 2.26156400  | -2.62590000 |
| C | 1.41192200  | 6.42074500  | -2.52614900 |
| H | 0.61955900  | 7.06765500  | -2.91877500 |
| H | 1.51342300  | 6.63670900  | -1.45653600 |
| H | 2.34656400  | 6.70608500  | -3.02422200 |
| C | 0.95324600  | 4.72572600  | -4.31280000 |
| H | 0.64949800  | 3.70434500  | -4.55903800 |
| H | 0.20729800  | 5.40964200  | -4.73441800 |
| H | 1.91044900  | 4.92368100  | -4.81076800 |
| C | -0.30114100 | 4.63321500  | -2.13576500 |
| H | -0.28146400 | 4.81809700  | -1.05900600 |
| H | -1.07190000 | 5.27370800  | -2.57648100 |
| H | -0.60683200 | 3.59341800  | -2.29805000 |
| N | 3.51810600  | 4.89533700  | -0.28321100 |
| C | 4.62190300  | 5.37562600  | -1.15123000 |
| C | 3.79405900  | 5.12350700  | 1.17056800  |
| C | 5.74060700  | 5.74219700  | -0.16883900 |
| H | 4.92214400  | 4.58876000  | -1.84633500 |
| C | 4.97594600  | 6.13383500  | 1.09559100  |
| H | 6.37862000  | 4.87354000  | 0.02206400  |
| H | 5.58254300  | 6.10419100  | 2.00427900  |
| H | 4.56986500  | 7.14838300  | 0.99101200  |
| H | 6.37467900  | 6.54645500  | -0.55325100 |
| H | 4.30060400  | 6.25487600  | -1.72252500 |
| C | 3.53853700  | -0.66841300 | -2.45037600 |
| C | 4.81293400  | -0.59857300 | -1.86138900 |
| C | 3.03445200  | -1.92947500 | -2.81478100 |
| C | 5.52458900  | -1.77034500 | -1.60869500 |
| H | 5.22844600  | 0.36734300  | -1.61579200 |
| C | 3.77339900  | -3.08522900 | -2.57016400 |
| H | 2.06214200  | -1.99990500 | -3.29265700 |
| C | 5.02366700  | -3.02430300 | -1.95392500 |
| H | 5.58370500  | -3.92696500 | -1.74862800 |
| O | -2.14237600 | -2.93137000 | -0.22623100 |
| C | -3.07390800 | -3.41775700 | -0.87954900 |
| C | -3.18024000 | -3.12890600 | -2.40044700 |

|   |             |             |             |
|---|-------------|-------------|-------------|
| H | -4.16402700 | -3.42882900 | -2.76077500 |
| N | -3.08953000 | -1.69094900 | -2.61637600 |
| C | -4.13496200 | -0.90080100 | -2.23006600 |
| N | -3.87267300 | 0.46098200  | -2.35271400 |
| H | -2.94592000 | 0.70866700  | -2.71236100 |
| C | -2.13324100 | -3.90787900 | -3.26526100 |
| H | -2.17061000 | -1.26056000 | -2.70560300 |
| C | -2.30932100 | -5.41998300 | -3.01996500 |
| H | -1.61670800 | -5.98308500 | -3.65519800 |
| H | -2.09873800 | -5.69485300 | -1.98041800 |
| H | -3.32565400 | -5.75294600 | -3.26440900 |
| C | -2.42417700 | -3.61083400 | -4.75121800 |
| H | -2.30226000 | -2.54845200 | -4.98167500 |
| H | -1.73414800 | -4.17657600 | -5.38790800 |
| H | -3.44686300 | -3.90043300 | -5.02341200 |
| C | -0.67894900 | -3.51588700 | -2.94433200 |
| H | -0.42203200 | -3.72400100 | -1.90332400 |
| H | 0.00248800  | -4.08774600 | -3.58231300 |
| H | -0.48780600 | -2.45299000 | -3.13360900 |
| N | -4.02613700 | -4.19889700 | -0.29983900 |
| C | -5.27952700 | -4.64614200 | -0.95337900 |
| C | -3.98471600 | -4.53834000 | 1.15719200  |
| C | -6.17074000 | -5.09086400 | 0.21246700  |
| H | -5.72336600 | -3.82649200 | -1.52212400 |
| C | -5.16094300 | -5.55281100 | 1.26341800  |
| H | -6.75513900 | -4.24440500 | 0.58712800  |
| H | -5.56590500 | -5.58756900 | 2.27804300  |
| H | -4.78882800 | -6.55456100 | 1.01243500  |
| H | -6.87118100 | -5.87699600 | -0.08448000 |
| H | -5.07712100 | -5.48415000 | -1.63227800 |
| C | -4.63396900 | 1.50967400  | -1.84302700 |
| C | -5.85532400 | 1.33442300  | -1.16633500 |
| C | -4.12933800 | 2.81521900  | -1.99585700 |
| C | -6.51389700 | 2.43908500  | -0.62841300 |
| H | -6.26800500 | 0.34029000  | -1.07369400 |
| C | -4.81596700 | 3.90458400  | -1.46232500 |
| H | -3.19876200 | 2.96866800  | -2.53447300 |
| C | -6.01241600 | 3.73299700  | -0.76428300 |
| H | -6.54198100 | 4.58212400  | -0.35210600 |
| C | 2.59681400  | 5.78550900  | 1.87575800  |
| H | 1.79270400  | 5.07471100  | 2.06199100  |
| H | 2.91356200  | 6.22347600  | 2.82799800  |
| H | 2.21073700  | 6.59924200  | 1.25325100  |
| C | -2.66736500 | -5.23748000 | 1.53992100  |
| H | -1.84061400 | -4.53184200 | 1.61339600  |
| H | -2.77877700 | -5.75669100 | 2.49761900  |
| H | -2.42400400 | -5.99246500 | 0.78515800  |
| O | -5.21057600 | -1.35844700 | -1.82865000 |
| O | 4.20224700  | 2.16130100  | -2.15923500 |
| C | 4.26042000  | 3.83212900  | 1.87139400  |
| C | 4.24084900  | 3.72955600  | 3.25113300  |
| C | 4.82042500  | 2.75674700  | 1.12461600  |
| C | 4.77103000  | 2.60017200  | 3.93147700  |
| H | 3.82626000  | 4.52944400  | 3.85881500  |
| C | 5.35506500  | 1.65423100  | 1.75278000  |
| H | 4.80847800  | 2.78773900  | 0.04070000  |
| C | 4.75478300  | 2.49135800  | 5.34917100  |
| C | 5.35330200  | 1.53858400  | 3.16738300  |
| H | 5.78979600  | 0.85023600  | 1.16396400  |
| C | 5.28949800  | 1.38932300  | 5.97793000  |
| H | 4.31474900  | 3.29777600  | 5.93190900  |

|    |             |             |             |
|----|-------------|-------------|-------------|
| C  | 5.89956700  | 0.41483300  | 3.84518500  |
| C  | 5.86836400  | 0.34081100  | 5.21955500  |
| H  | 5.27229900  | 1.32023800  | 7.06235100  |
| H  | 6.34680100  | -0.38200300 | 3.25515100  |
| H  | 6.29007900  | -0.52115700 | 5.72927900  |
| C  | -4.27903000 | -3.30419400 | 2.03316700  |
| C  | -3.94461300 | -3.29269800 | 3.37510900  |
| C  | -4.99152100 | -2.18834300 | 1.50896700  |
| C  | -4.30180500 | -2.21768300 | 4.23255500  |
| H  | -3.39921400 | -4.12284800 | 3.81533200  |
| C  | -5.36737000 | -1.13702000 | 2.31468300  |
| H  | -5.23153600 | -2.14907500 | 0.45214700  |
| C  | -3.95856100 | -2.20244000 | 5.61241900  |
| C  | -5.04299200 | -1.11653500 | 3.69649500  |
| H  | -5.92996400 | -0.30560100 | 1.89618400  |
| C  | -4.33456700 | -1.15395700 | 6.42184300  |
| H  | -3.39486200 | -3.03821400 | 6.02114100  |
| C  | -5.42107300 | -0.05110700 | 4.55800800  |
| C  | -5.07529300 | -0.06821900 | 5.89069900  |
| H  | -4.06795400 | -1.15727800 | 7.47541300  |
| H  | -5.99629300 | 0.77410700  | 4.14359900  |
| H  | -5.37311100 | 0.74867000  | 6.54272200  |
| C  | -0.72040400 | 0.90846300  | 0.20158900  |
| H  | -1.70761400 | 0.95195300  | -0.24176300 |
| H  | -0.10526700 | 1.79081700  | 0.05202900  |
| C  | -0.10991300 | -0.36946000 | 0.35860100  |
| H  | -0.63766000 | -1.22364800 | -0.05628000 |
| C  | 1.05074000  | -0.50354900 | 1.07795500  |
| C  | 1.54509700  | 0.71895000  | 1.79908600  |
| H  | 2.44976300  | 0.52348700  | 2.37527600  |
| H  | 1.78895500  | 1.50998400  | 1.08012400  |
| C  | 0.47256000  | 1.31264100  | 2.78507900  |
| H  | 0.78578500  | 2.33350600  | 3.01859600  |
| H  | 0.50991000  | 0.74455500  | 3.72201200  |
| C  | -0.96401600 | 1.27688800  | 2.31236900  |
| H  | -1.49588000 | 0.35115600  | 2.51790700  |
| C  | -1.76681000 | 2.36809900  | 2.04391200  |
| C  | -3.25233200 | 2.20636500  | 1.93438400  |
| H  | -3.57745800 | 1.17141300  | 2.06271200  |
| H  | -3.61754000 | 2.58626900  | 0.97246200  |
| H  | -3.73806300 | 2.81991100  | 2.70677800  |
| C  | -1.23322100 | 3.75557200  | 1.84877700  |
| H  | -0.19524700 | 3.77289600  | 1.50820700  |
| H  | -1.28960100 | 4.29648600  | 2.80579800  |
| H  | -1.84946500 | 4.31141000  | 1.13499600  |
| Cl | -0.64954000 | 0.66782000  | -2.95806500 |
| C  | 1.73518200  | -1.80101300 | 1.19940800  |
| C  | 3.11992900  | -1.85801900 | 1.45282500  |
| C  | 1.04167000  | -3.01488300 | 1.00535900  |
| C  | 3.79427900  | -3.07371700 | 1.47466500  |
| H  | 3.69027800  | -0.94528800 | 1.58297300  |
| C  | 1.71493000  | -4.22976400 | 1.03895300  |
| H  | -0.02834500 | -3.01079100 | 0.82709100  |
| C  | 3.09389200  | -4.26309100 | 1.26364600  |
| H  | 4.86677800  | -3.09161000 | 1.63162500  |
| H  | 1.17019700  | -5.15451200 | 0.88373100  |
| C  | -7.75614900 | 2.19729800  | 0.18732200  |
| C  | -4.21082600 | 5.27665700  | -1.58222400 |
| C  | 6.82060300  | -1.66266200 | -0.85412300 |
| C  | 3.18352200  | -4.42322000 | -2.93154800 |
| F  | 6.59302900  | -1.53630800 | 0.49338500  |



|   |             |             |             |
|---|-------------|-------------|-------------|
| F | 7.53918000  | -0.57976300 | -1.21139500 |
| F | 7.60405600  | -2.74738400 | -1.00658400 |
| F | 4.12328600  | -5.38333600 | -3.03759900 |
| F | 2.28718100  | -4.84627000 | -2.00582100 |
| F | 2.51955900  | -4.37485300 | -4.11242800 |
| F | -7.43745500 | 1.77461500  | 1.44415600  |
| F | -8.54366200 | 1.24528200  | -0.34975300 |
| F | -8.50045300 | 3.31304300  | 0.33330600  |
| F | -5.11549000 | 6.25634300  | -1.38642700 |
| F | -3.22513800 | 5.46644000  | -0.65946000 |
| F | -3.64427300 | 5.47970000  | -2.79163800 |
| C | 3.84673400  | -5.56305200 | 1.19017900  |
| F | 4.37506100  | -5.75990500 | -0.04408900 |
| F | 3.05673400  | -6.62551000 | 1.45324400  |
| F | 4.87884000  | -5.59572200 | 2.06257900  |

**TS-R-8:**

Imaginary frequency: -169.33 cm<sup>-1</sup>

E[B3LYP/6-31G(d)]: -5531.667112 Hartree

E[PCM(CyH)-B3LYP-D3(BJ)/6-311+G(d,p)]: -5533.631072 Hartree

Free energy correction: 1.301321 Hartree

Free energy correction – Grimme quasi-RRHO: 1.298054 Hartree

Free energy correction – Truhlar quasi-RRHO: 1.307775 Hartree

|   |             |            |             |
|---|-------------|------------|-------------|
| O | 1.40575200  | 3.49346700 | 1.09962100  |
| C | 2.02463800  | 4.28559000 | 0.37100600  |
| C | 1.65252200  | 4.39827400 | -1.13153800 |
| H | 2.42710000  | 4.96059200 | -1.65447400 |
| N | 1.63331300  | 3.07056800 | -1.72008000 |
| C | 2.80721100  | 2.39259800 | -1.88905300 |
| N | 2.63668600  | 1.11028400 | -2.38949900 |
| H | 1.66971700  | 0.79856400 | -2.50768800 |
| C | 0.30591700  | 5.16193800 | -1.38346700 |
| H | 0.75452900  | 2.56522900 | -1.81661100 |
| C | 0.43964100  | 6.59960200 | -0.84172000 |
| H | -0.48052900 | 7.15959100 | -1.04178900 |
| H | 0.60812300  | 6.61834600 | 0.24109800  |
| H | 1.26392800  | 7.13717600 | -1.32605100 |
| C | 0.06152500  | 5.23130800 | -2.90594000 |
| H | -0.05481400 | 4.23665700 | -3.34575700 |
| H | -0.85621700 | 5.79522100 | -3.10859000 |
| H | 0.89013700  | 5.73327200 | -3.42050500 |
| C | -0.90405200 | 4.48780200 | -0.70869200 |
| H | -0.78212100 | 4.44733300 | 0.37596300  |
| H | -1.81147100 | 5.05763700 | -0.93107900 |
| H | -1.06115000 | 3.46596100 | -1.07247800 |
| N | 3.02253400  | 5.07433900 | 0.84844600  |
| C | 3.95273400  | 5.86720200 | 0.00606400  |
| C | 3.40233100  | 5.09942800 | 2.29515600  |
| C | 5.09310400  | 6.24134000 | 0.95999200  |
| H | 4.29548000  | 5.26721200 | -0.83948200 |
| C | 4.40117000  | 6.29217500 | 2.32209500  |
| H | 5.86402200  | 5.46451900 | 0.95209500  |
| H | 5.08980000  | 6.21779100 | 3.16808600  |
| H | 3.83691500  | 7.22828400 | 2.42552400  |
| H | 5.56513900  | 7.18817900 | 0.68222700  |
| H | 3.45006300  | 6.76605100 | -0.37146900 |
| C | 3.62596400  | 0.14575300 | -2.58071500 |
| C | 5.00025200  | 0.43873300 | -2.62343400 |

|   |             |             |             |
|---|-------------|-------------|-------------|
| C | 3.21337200  | -1.18540200 | -2.75890200 |
| C | 5.92101800  | -0.59211000 | -2.80879100 |
| H | 5.32721600  | 1.46223500  | -2.50882000 |
| C | 4.15141500  | -2.19669600 | -2.95462300 |
| H | 2.15386300  | -1.42351400 | -2.73579500 |
| C | 5.51712400  | -1.91638400 | -2.97564900 |
| H | 6.24263200  | -2.70528800 | -3.12325400 |
| O | -1.84267300 | -3.08422200 | 0.11946500  |
| C | -2.72958600 | -3.62873600 | -0.55040900 |
| C | -2.85929600 | -3.30746200 | -2.06176200 |
| H | -3.81783000 | -3.67067700 | -2.43078700 |
| N | -2.88366100 | -1.86453100 | -2.24293400 |
| C | -4.02635300 | -1.16265000 | -1.97035800 |
| N | -3.86856100 | 0.20804200  | -2.12954800 |
| H | -2.92735000 | 0.52737800  | -2.37557500 |
| C | -1.75533200 | -3.97810600 | -2.94992500 |
| H | -2.00363800 | -1.35530300 | -2.28547400 |
| C | -1.80247600 | -5.50560800 | -2.74551400 |
| H | -1.05685200 | -5.98972500 | -3.38590700 |
| H | -1.58078000 | -5.78945800 | -1.71054600 |
| H | -2.78283900 | -5.91872000 | -3.01266800 |
| C | -2.07669000 | -3.66774300 | -4.42678200 |
| H | -2.04208700 | -2.59346500 | -4.62964100 |
| H | -1.34681000 | -4.15935200 | -5.08031200 |
| H | -3.07427000 | -4.03150300 | -4.70296000 |
| C | -0.33605600 | -3.47650900 | -2.62447500 |
| H | -0.05092100 | -3.70567800 | -1.59511400 |
| H | 0.38654600  | -3.95760200 | -3.29123400 |
| H | -0.23804800 | -2.39424800 | -2.77085600 |
| N | -3.61899200 | -4.50235900 | -0.00161200 |
| C | -4.81019000 | -5.05364400 | -0.69448300 |
| C | -3.57657200 | -4.88116300 | 1.44335700  |
| C | -5.63876100 | -5.69186900 | 0.42784400  |
| H | -5.35347500 | -4.25795100 | -1.20978400 |
| C | -4.58447300 | -6.06533500 | 1.47018100  |
| H | -6.34249000 | -4.96289700 | 0.84155000  |
| H | -4.99392500 | -6.22147900 | 2.47201600  |
| H | -4.06192700 | -6.98310500 | 1.17060400  |
| H | -6.21465900 | -6.55125700 | 0.07242900  |
| H | -4.50424000 | -5.80767500 | -1.42958600 |
| C | -4.81838500 | 1.20646800  | -1.93132400 |
| C | -6.15882900 | 0.96183500  | -1.59170200 |
| C | -4.39334100 | 2.53985100  | -2.09490600 |
| C | -7.02892900 | 2.03585100  | -1.39416600 |
| H | -6.50166000 | -0.05902300 | -1.49783100 |
| C | -5.28360700 | 3.59185000  | -1.90721200 |
| H | -3.36560300 | 2.73992500  | -2.38192100 |
| C | -6.61304800 | 3.35587900  | -1.54622700 |
| H | -7.30401600 | 4.17688700  | -1.40428100 |
| C | 2.19224700  | 5.41898800  | 3.19323300  |
| H | 1.54593100  | 4.55249700  | 3.32772700  |
| H | 2.53059900  | 5.76527500  | 4.17523700  |
| H | 1.60746400  | 6.22866700  | 2.74465400  |
| C | -2.18250500 | -5.37668000 | 1.87255500  |
| H | -1.48657400 | -4.55295400 | 2.02572500  |
| H | -2.25812200 | -5.95843200 | 2.79729300  |
| H | -1.77862800 | -6.04073900 | 1.10122800  |
| O | -5.08788300 | -1.70345900 | -1.63840900 |
| O | 3.90883500  | 2.89283900  | -1.62599000 |
| C | 4.12995400  | 3.81056400  | 2.71808600  |
| C | 4.69809200  | 2.95254500  | 1.79662200  |

|   |             |             |             |
|---|-------------|-------------|-------------|
| C | 4.31417400  | 3.53075200  | 4.10405600  |
| C | 5.46782300  | 1.82620600  | 2.19942600  |
| H | 4.56162300  | 3.11428200  | 0.73135200  |
| C | 5.03691200  | 2.43917600  | 4.52670800  |
| H | 3.88224900  | 4.19160500  | 4.84933800  |
| C | 6.08854200  | 0.96831200  | 1.25071100  |
| C | 5.64378200  | 1.55625100  | 3.59441500  |
| H | 5.16252600  | 2.24857100  | 5.59038800  |
| C | 6.85092500  | -0.10315100 | 1.66270600  |
| H | 5.96193400  | 1.17728600  | 0.19264000  |
| C | 6.42292100  | 0.43537100  | 3.98829100  |
| C | 7.01654400  | -0.37430500 | 3.04434200  |
| H | 7.33215500  | -0.73436000 | 0.92209400  |
| H | 6.55395100  | 0.23391800  | 5.04919500  |
| H | 7.62337700  | -1.22005400 | 3.35730600  |
| C | -4.10184600 | -3.74327500 | 2.33838500  |
| C | -4.84597000 | -2.69534400 | 1.83190500  |
| C | -3.90608200 | -3.81033200 | 3.74883400  |
| C | -5.42790100 | -1.71170300 | 2.67855700  |
| H | -5.00244000 | -2.59405600 | 0.76204300  |
| C | -4.43771200 | -2.86396600 | 4.59391500  |
| H | -3.32728000 | -4.62491300 | 4.17319300  |
| C | -6.22799600 | -0.65627100 | 2.15980600  |
| C | -5.21879100 | -1.78926000 | 4.09267900  |
| H | -4.27109000 | -2.93767800 | 5.66647300  |
| C | -6.78997000 | 0.28040100  | 2.99919700  |
| H | -6.39624800 | -0.60374400 | 1.08794100  |
| C | -5.80359500 | -0.80300000 | 4.93169600  |
| C | -6.57236300 | 0.20847700  | 4.39817100  |
| H | -7.40808900 | 1.07060400  | 2.58413200  |
| H | -5.64325900 | -0.86649400 | 6.00585600  |
| H | -7.02433300 | 0.95082600  | 5.05098600  |
| C | -8.44144500 | 1.72411700  | -0.97736200 |
| C | -4.79359600 | 5.00929100  | -2.03424200 |
| C | 7.38626700  | -0.25198500 | -2.76967200 |
| C | 3.65705300  | -3.60824900 | -3.12518500 |
| F | 7.66049500  | 0.88990900  | -3.43455400 |
| F | 7.81676100  | -0.06367000 | -1.49123300 |
| F | 8.15536300  | -1.22680900 | -3.29801600 |
| F | 4.66211200  | -4.49053100 | -3.29786300 |
| F | 2.83300500  | -3.72362100 | -4.19555200 |
| F | 2.94292000  | -4.01792300 | -2.04807700 |
| F | -8.47979300 | 1.19500500  | 0.27628500  |
| F | -9.01823400 | 0.81461600  | -1.79042100 |
| F | -9.23057100 | 2.81837600  | -0.96484200 |
| F | -3.76283900 | 5.11969500  | -2.90234100 |
| F | -5.76653800 | 5.84758300  | -2.44823900 |
| F | -4.34759200 | 5.49061600  | -0.84291600 |
| C | -0.52139100 | 0.59597600  | 0.78021600  |
| H | -1.49823500 | 0.60737100  | 0.31281000  |
| H | -0.00027000 | 1.54956800  | 0.79748100  |
| C | 0.21673400  | -0.62303400 | 0.75347000  |
| H | -0.22060400 | -1.44797100 | 0.19967700  |
| C | 1.35244900  | -0.77030700 | 1.50756800  |
| C | 1.68664600  | 0.35307800  | 2.44849900  |
| H | 2.59776700  | 0.16231300  | 3.01719700  |
| H | 1.83957500  | 1.28773300  | 1.89655900  |
| C | 0.52067600  | 0.60155600  | 3.47630100  |
| H | 0.72127000  | 1.55973700  | 3.96373700  |
| H | 0.57344700  | -0.17020700 | 4.25314100  |
| C | -0.88070800 | 0.56607300  | 2.90538800  |

|    |             |             |             |
|----|-------------|-------------|-------------|
| H  | -1.35324700 | -0.41238800 | 2.87593600  |
| C  | -1.74334900 | 1.64122400  | 2.81451300  |
| C  | -3.19143400 | 1.42835000  | 2.50475000  |
| H  | -3.44724000 | 0.37795200  | 2.35432000  |
| H  | -3.48589500 | 2.00161400  | 1.61542700  |
| H  | -3.80646500 | 1.81378800  | 3.32993400  |
| C  | -1.29584900 | 3.05863600  | 3.01823600  |
| H  | -0.30301100 | 3.24769600  | 2.59930100  |
| H  | -1.25110200 | 3.27171300  | 4.09665200  |
| H  | -2.00442400 | 3.76501900  | 2.57668200  |
| Cl | -0.66179600 | 0.73907400  | -2.39968600 |
| C  | 2.12482200  | -2.02375200 | 1.50737200  |
| C  | 3.49765800  | -2.01924800 | 1.82265100  |
| C  | 1.51998900  | -3.25316000 | 1.16870600  |
| C  | 4.24135200  | -3.19374700 | 1.79134100  |
| H  | 4.00605500  | -1.08907300 | 2.05090500  |
| C  | 2.26258500  | -4.42761000 | 1.15001700  |
| H  | 0.46005000  | -3.29417700 | 0.93876800  |
| C  | 3.62539900  | -4.40265300 | 1.46034800  |
| H  | 5.30249900  | -3.16488600 | 2.01420600  |
| H  | 1.78497600  | -5.36613800 | 0.88985800  |
| C  | 4.41520100  | -5.68321800 | 1.50058900  |
| F  | 5.70980600  | -5.48588100 | 1.16881700  |
| F  | 3.91424200  | -6.61327000 | 0.66029900  |
| F  | 4.40769100  | -6.22903800 | 2.74117700  |

**TS-R-9:**

Imaginary frequency: -185.77 cm<sup>-1</sup>

E[B3LYP/6-31G(d)]: -5531.669106 Hartree

E[PCM(CyH)-B3LYP-D3(BJ)/6-311+G(d,p)]: -5533.627804 Hartree

Free energy correction: 1.303346 Hartree

Free energy correction – Grimme quasi-RRHO: 1.299153 Hartree

Free energy correction – Truhlar quasi-RRHO: 1.308021 Hartree

|   |             |             |             |
|---|-------------|-------------|-------------|
| O | -2.13540500 | -2.91892100 | 0.15940600  |
| C | -2.88349600 | -3.39730300 | -0.70225700 |
| C | -2.67771900 | -3.02435100 | -2.19362100 |
| H | -3.53272800 | -3.36608600 | -2.77822100 |
| N | -2.63690200 | -1.57645400 | -2.33031200 |
| C | -3.77908200 | -0.84500300 | -2.17430500 |
| N | -3.56782100 | 0.52542600  | -2.28364000 |
| H | -2.59667400 | 0.82100500  | -2.42492600 |
| C | -1.40802300 | -3.69361900 | -2.82577000 |
| H | -1.74140400 | -1.09442100 | -2.30648600 |
| C | -1.55137400 | -5.22570400 | -2.72511900 |
| H | -0.69758300 | -5.71127700 | -3.21034800 |
| H | -1.57772700 | -5.56885100 | -1.68485500 |
| H | -2.46092300 | -5.57944400 | -3.22626900 |
| C | -1.34566500 | -3.30265100 | -4.31761100 |
| H | -1.25555100 | -2.22039900 | -4.45037700 |
| H | -0.47458200 | -3.76986000 | -4.78964100 |
| H | -2.24353400 | -3.63354400 | -4.85439500 |
| C | -0.09704300 | -3.27097300 | -2.13400700 |
| H | -0.08925700 | -3.55318600 | -1.07910900 |
| H | 0.74875400  | -3.76170700 | -2.62527800 |
| H | 0.07559400  | -2.18984200 | -2.19204400 |
| N | -3.88730500 | -4.26030600 | -0.38547200 |
| C | -4.96403200 | -4.69248300 | -1.30848200 |
| C | -4.10253000 | -4.74417500 | 1.01267000  |

|   |             |             |             |
|---|-------------|-------------|-------------|
| C | -6.03090700 | -5.28404900 | -0.37985900 |
| H | -5.33576200 | -3.83928000 | -1.87960000 |
| C | -5.20855800 | -5.81652200 | 0.79406600  |
| H | -6.71492500 | -4.49900700 | -0.04193900 |
| H | -5.79398700 | -5.97879100 | 1.70317200  |
| H | -4.73446500 | -6.76867500 | 0.52227100  |
| H | -6.62365500 | -6.05808100 | -0.87606800 |
| H | -4.58796600 | -5.45347400 | -2.00432600 |
| C | -4.47744900 | 1.53918700  | -1.99798300 |
| C | -5.86698400 | 1.34203600  | -1.90079600 |
| C | -3.96370600 | 2.83407500  | -1.80478800 |
| C | -6.69628400 | 2.41682600  | -1.58159900 |
| H | -6.27338000 | 0.35535900  | -2.07237500 |
| C | -4.81371400 | 3.89114900  | -1.48548100 |
| H | -2.89453300 | 3.00199900  | -1.90236500 |
| C | -6.18970200 | 3.69830300  | -1.36405300 |
| H | -6.84671100 | 4.52188800  | -1.11715600 |
| O | 1.74401100  | 3.50019700  | 1.06627200  |
| C | 2.58586600  | 4.15202600  | 0.42793800  |
| C | 2.41656600  | 4.33799500  | -1.10216900 |
| H | 3.34146100  | 4.73311000  | -1.52045400 |
| N | 2.21942900  | 3.04181000  | -1.72654600 |
| C | 3.29180700  | 2.21742900  | -1.93592100 |
| N | 2.94514800  | 1.01591600  | -2.53352100 |
| H | 1.94562400  | 0.86256100  | -2.68580100 |
| C | 1.28610700  | 5.34895500  | -1.49928800 |
| H | 1.28251200  | 2.64887800  | -1.79365800 |
| C | 1.58263800  | 6.71622200  | -0.85106600 |
| H | 0.81746500  | 7.44253000  | -1.14714000 |
| H | 1.57926400  | 6.66264600  | 0.24365300  |
| H | 2.55337300  | 7.11320900  | -1.17212400 |
| C | 1.31035700  | 5.51397300  | -3.03318800 |
| H | 1.08325900  | 4.57369800  | -3.54350600 |
| H | 0.56422600  | 6.25545000  | -3.34171100 |
| H | 2.29161200  | 5.85917500  | -3.38178500 |
| C | -0.11533800 | 4.88416600  | -1.06233500 |
| H | -0.18133900 | 4.79054000  | 0.02369300  |
| H | -0.86532500 | 5.61087200  | -1.39113200 |
| H | -0.38529300 | 3.91826700  | -1.50451700 |
| N | 3.67422700  | 4.71158400  | 1.02126100  |
| C | 4.80392400  | 5.34576700  | 0.29267400  |
| C | 3.93543800  | 4.61390900  | 2.49013600  |
| C | 5.89300800  | 5.51836400  | 1.35832400  |
| H | 5.12643100  | 4.70772900  | -0.53306400 |
| C | 5.09359900  | 5.63857400  | 2.65544300  |
| H | 6.53846800  | 4.63511700  | 1.38836900  |
| H | 5.68214900  | 5.43675200  | 3.55453600  |
| H | 4.66734000  | 6.64611200  | 2.74769800  |
| H | 6.52357200  | 6.38978900  | 1.15986200  |
| H | 4.49393800  | 6.31846000  | -0.10730200 |
| C | 3.78734100  | -0.03725200 | -2.88533000 |
| C | 5.17564000  | -0.03543900 | -2.67931900 |
| C | 3.19438300  | -1.16040400 | -3.49392100 |
| C | 5.93103600  | -1.15074300 | -3.04747200 |
| H | 5.64492200  | 0.83730900  | -2.24786000 |
| C | 3.97059400  | -2.25132300 | -3.86891100 |
| H | 2.12488000  | -1.16541400 | -3.67828200 |
| C | 5.34999100  | -2.26612600 | -3.64337300 |
| H | 5.95156300  | -3.11645500 | -3.93815300 |
| C | -2.83504900 | -5.41361500 | 1.57874100  |
| H | -2.09238100 | -4.67826600 | 1.88712300  |

|   |             |             |             |
|---|-------------|-------------|-------------|
| H | -3.08879500 | -6.04302700 | 2.43788400  |
| H | -2.39580100 | -6.06429200 | 0.81534400  |
| C | 2.72300600  | 5.06622900  | 3.32530400  |
| H | 1.94677500  | 4.30311800  | 3.36157200  |
| H | 3.03787900  | 5.30450100  | 4.34656400  |
| H | 2.29867700  | 5.97780700  | 2.89184700  |
| O | 4.45030400  | 2.53765100  | -1.63971800 |
| O | -4.88592900 | -1.35679600 | -1.96919000 |
| C | -4.63601000 | -3.62801200 | 1.92886200  |
| C | -5.20049100 | -2.47225800 | 1.42654800  |
| C | -4.62940400 | -3.81612200 | 3.34173500  |
| C | -5.77359100 | -1.48874000 | 2.27848500  |
| H | -5.20988200 | -2.28168900 | 0.35745100  |
| C | -5.16143700 | -2.87716900 | 4.19446100  |
| H | -4.19651500 | -4.71817300 | 3.76286000  |
| C | -6.38770200 | -0.31581000 | 1.75938100  |
| C | -5.75322300 | -1.68699400 | 3.69595800  |
| H | -5.14052700 | -3.04461100 | 5.26919500  |
| C | -6.95013300 | 0.61808600  | 2.60213800  |
| H | -6.42072700 | -0.17494100 | 0.68279800  |
| C | -6.33128000 | -0.70085900 | 4.53956700  |
| C | -6.91686700 | 0.42616900  | 4.00600500  |
| H | -7.43310900 | 1.49614400  | 2.18412200  |
| H | -6.31313700 | -0.85639200 | 5.61616600  |
| H | -7.36618600 | 1.16839500  | 4.66082100  |
| C | 4.43711200  | 3.21213500  | 2.88268300  |
| C | 4.88677800  | 2.30240800  | 1.94557100  |
| C | 4.54076300  | 2.86689100  | 4.26238300  |
| C | 5.46327500  | 1.05878900  | 2.32582700  |
| H | 4.81349100  | 2.51853200  | 0.88376600  |
| C | 5.07966400  | 1.66634300  | 4.66358700  |
| H | 4.19757600  | 3.56567500  | 5.01947500  |
| C | 5.96243900  | 0.14078300  | 1.36166000  |
| C | 5.56780200  | 0.72823800  | 3.71490300  |
| H | 5.15168400  | 1.42912400  | 5.72285900  |
| C | 6.54454500  | -1.04446500 | 1.75251700  |
| H | 5.88608400  | 0.39328600  | 0.30812000  |
| C | 6.16458100  | -0.50663100 | 4.08751400  |
| C | 6.64688800  | -1.37110000 | 3.12817300  |
| H | 6.93177400  | -1.72581100 | 1.00140200  |
| H | 6.24736800  | -0.75213200 | 5.14401200  |
| H | 7.11763200  | -2.30500800 | 3.42459300  |
| C | 7.40575500  | -1.12575700 | -2.74818800 |
| C | 3.31523900  | -3.46011200 | -4.48135800 |
| C | -8.16905700 | 2.15656200  | -1.40670200 |
| C | -4.20303000 | 5.23539000  | -1.20246000 |
| F | -8.64301500 | 1.28564300  | -2.32021900 |
| F | -8.43174200 | 1.61826900  | -0.18508400 |
| F | -8.90223300 | 3.28643300  | -1.49891500 |
| F | -5.12402000 | 6.20797500  | -1.06351500 |
| F | -3.34530400 | 5.62085100  | -2.17292000 |
| F | -3.47950200 | 5.21030000  | -0.04401200 |
| F | 7.63768700  | -1.16195900 | -1.40764000 |
| F | 7.99408100  | 0.00104500  | -3.20385300 |
| F | 8.06166800  | -2.17385800 | -3.28792300 |
| F | 2.16015000  | -3.15104900 | -5.11416200 |
| F | 4.11936200  | -4.06859500 | -5.37922400 |
| F | 3.00674000  | -4.39313300 | -3.54392100 |
| C | -0.66470900 | 0.89290300  | 0.82622900  |
| H | -1.57419200 | 0.98120600  | 0.24491200  |
| H | -0.00735600 | 1.75672200  | 0.78460600  |

|    |             |             |             |
|----|-------------|-------------|-------------|
| C  | -0.12164100 | -0.41220700 | 1.02591700  |
| H  | -0.61936400 | -1.23876900 | 0.52530900  |
| C  | 0.90434400  | -0.60858400 | 1.91522700  |
| C  | 1.32365400  | 0.58319600  | 2.72980300  |
| H  | 2.13085600  | 0.34870800  | 3.42492700  |
| H  | 1.68399600  | 1.38673800  | 2.07714900  |
| C  | 0.12403800  | 1.16396400  | 3.56550400  |
| H  | 0.41823800  | 2.16059200  | 3.90582900  |
| H  | -0.00667500 | 0.54675500  | 4.46229200  |
| C  | -1.21702500 | 1.20498700  | 2.86251700  |
| H  | -1.80757700 | 0.29523300  | 2.93656300  |
| C  | -1.93591700 | 2.34528700  | 2.55301900  |
| C  | -3.38774700 | 2.25549800  | 2.19951500  |
| H  | -3.76005700 | 1.22942400  | 2.15925900  |
| H  | -3.59000800 | 2.75857000  | 1.24604700  |
| H  | -3.97354300 | 2.79945400  | 2.95509000  |
| C  | -1.33253400 | 3.71767700  | 2.55524700  |
| H  | -0.26353700 | 3.71390900  | 2.32684000  |
| H  | -1.46512800 | 4.16308100  | 3.55314000  |
| H  | -1.84643600 | 4.37048200  | 1.84362500  |
| Cl | -0.35405800 | 0.97580100  | -2.35218300 |
| C  | 1.47432400  | -1.94288900 | 2.16752700  |
| C  | 2.78644800  | -2.08366300 | 2.66011500  |
| C  | 0.72870000  | -3.11341400 | 1.90932200  |
| C  | 3.33593000  | -3.34169100 | 2.88372500  |
| H  | 3.40501100  | -1.21060700 | 2.83503100  |
| C  | 1.27535200  | -4.36897900 | 2.14510500  |
| H  | -0.28772200 | -3.04286400 | 1.53708000  |
| C  | 2.57994400  | -4.48859900 | 2.63422900  |
| H  | 4.35631600  | -3.42537600 | 3.24078300  |
| H  | 0.68800200  | -5.25941700 | 1.94651800  |
| C  | 3.14426600  | -5.84794900 | 2.94806600  |
| F  | 4.48997600  | -5.87447000 | 2.83410400  |
| F  | 2.64607600  | -6.80110500 | 2.13068100  |
| F  | 2.84982800  | -6.22554100 | 4.21561300  |

#### TS-R-10:

Imaginary frequency: -230.57 cm<sup>-1</sup>

E[B3LYP/6-31G(d)]: -5531.650620 Hartree

E[PCM(CyH)-B3LYP-D3(BJ)/6-311+G(d,p)]: -5533.605454 Hartree

Free energy correction: 1.296333 Hartree

Free energy correction – Grimme quasi-RRHO: 1.295093 Hartree

Free energy correction – Truhlar quasi-RRHO: 1.306175 Hartree

|   |            |             |             |
|---|------------|-------------|-------------|
| O | 3.10194600 | 3.22182900  | 0.11439400  |
| C | 4.07478700 | 3.29361000  | -0.64041200 |
| C | 3.93974000 | 2.78629100  | -2.09800300 |
| H | 4.91987600 | 2.73330200  | -2.56970700 |
| N | 3.43463500 | 1.41936200  | -2.08324600 |
| C | 4.30277700 | 0.38248700  | -1.83092800 |
| N | 3.66112800 | -0.84261600 | -1.73894800 |
| H | 2.64304600 | -0.82763600 | -1.83105700 |
| C | 3.05299800 | 3.71359900  | -2.99810900 |
| H | 2.46254400 | 1.28570100  | -1.81851300 |
| C | 3.60677100 | 5.15111300  | -2.93588900 |
| H | 3.04645300 | 5.79902400  | -3.62009100 |
| H | 3.52005100 | 5.57843900  | -1.93106400 |
| H | 4.66140800 | 5.19082200  | -3.23547700 |
| C | 3.15031200 | 3.20408900  | -4.45033300 |

|   |             |             |             |
|---|-------------|-------------|-------------|
| H | 2.79879900  | 2.17113200  | -4.53203100 |
| H | 2.53895800  | 3.82859500  | -5.11332400 |
| H | 4.18367300  | 3.23878300  | -4.81753600 |
| C | 1.57426500  | 3.72663800  | -2.56204900 |
| H | 1.46719000  | 4.04299500  | -1.52223000 |
| H | 1.01065900  | 4.42043100  | -3.19867200 |
| H | 1.10729400  | 2.74019800  | -2.66513100 |
| N | 5.27910600  | 3.79768100  | -0.24206800 |
| C | 6.53103800  | 3.75420900  | -1.03342100 |
| C | 5.49323400  | 4.32000900  | 1.14119700  |
| C | 7.62823600  | 4.08119300  | -0.01268100 |
| H | 6.66523300  | 2.76875600  | -1.48541500 |
| C | 6.90344200  | 4.96285200  | 1.00546300  |
| H | 7.98519900  | 3.16324400  | 0.46475500  |
| H | 7.41084000  | 5.02414900  | 1.97216200  |
| H | 6.79529400  | 5.98299300  | 0.61399100  |
| H | 8.48663200  | 4.57579800  | -0.47707400 |
| H | 6.50487700  | 4.50943200  | -1.83050100 |
| C | 4.22026800  | -2.08113900 | -1.43116900 |
| C | 5.58818600  | -2.29035400 | -1.18929400 |
| C | 3.34472100  | -3.17980000 | -1.35907200 |
| C | 6.04059100  | -3.56668300 | -0.85191100 |
| H | 6.27320300  | -1.45814400 | -1.26912000 |
| C | 3.82301300  | -4.44762100 | -1.04404500 |
| H | 2.28622800  | -3.02799000 | -1.54552300 |
| C | 5.17695800  | -4.65791600 | -0.77710000 |
| H | 5.54503600  | -5.64216700 | -0.51825700 |
| O | -3.09093500 | 1.91440400  | 1.18291400  |
| C | -2.70439300 | 1.56310800  | 2.30570400  |
| C | -1.24737500 | 1.07282600  | 2.50357900  |
| H | -1.14954900 | 0.60595500  | 3.48451900  |
| N | -0.95115200 | 0.04183200  | 1.52170800  |
| C | -1.49618300 | -1.20217000 | 1.64347700  |
| N | -1.10847600 | -2.06420100 | 0.62406700  |
| H | -0.49042600 | -1.66742000 | -0.09206700 |
| C | -0.18582100 | 2.22671000  | 2.45100400  |
| H | -0.45265200 | 0.28530600  | 0.67042200  |
| C | -0.50836500 | 3.24696700  | 3.56123900  |
| H | 0.25252800  | 4.03499300  | 3.57059100  |
| H | -1.48102900 | 3.72898000  | 3.40948900  |
| H | -0.50813000 | 2.77810200  | 4.55315300  |
| C | 1.20400100  | 1.61666100  | 2.73187300  |
| H | 1.49444200  | 0.89071200  | 1.96764700  |
| H | 1.96738400  | 2.40074100  | 2.73162000  |
| H | 1.22690300  | 1.11181800  | 3.70588300  |
| C | -0.15913400 | 2.95728600  | 1.09453800  |
| H | -1.11507000 | 3.44117200  | 0.87839900  |
| H | 0.62978700  | 3.71517200  | 1.10907000  |
| H | 0.08144000  | 2.28719000  | 0.26229600  |
| N | -3.52569200 | 1.60039200  | 3.38992800  |
| C | -3.22932800 | 0.98387200  | 4.70573900  |
| C | -4.92128600 | 2.12955200  | 3.30749100  |
| C | -4.59314100 | 0.92892400  | 5.40405800  |
| H | -2.79298100 | -0.00763500 | 4.56814000  |
| C | -5.33502100 | 2.12529300  | 4.80715600  |
| H | -5.10871500 | -0.00368100 | 5.15334600  |
| H | -6.42091500 | 2.07133900  | 4.92323200  |
| H | -4.99026000 | 3.05634600  | 5.27557200  |
| H | -4.49903300 | 0.98064400  | 6.49265400  |
| H | -2.52605000 | 1.60908500  | 5.27002600  |
| C | -1.56034100 | -3.35763700 | 0.38263900  |



|   |             |             |             |
|---|-------------|-------------|-------------|
| C | -2.34005500 | -4.10486300 | 1.28168200  |
| C | -1.20158900 | -3.93829800 | -0.84801100 |
| C | -2.76410700 | -5.38624400 | 0.92566700  |
| H | -2.59784700 | -3.67691900 | 2.24041800  |
| C | -1.62759100 | -5.22187200 | -1.17446500 |
| H | -0.58202000 | -3.37546100 | -1.54009000 |
| C | -2.42191300 | -5.96242300 | -0.29684900 |
| H | -2.75038600 | -6.96144100 | -0.55287000 |
| C | 4.45805000  | 5.40170200  | 1.50337300  |
| H | 3.47944400  | 4.96907000  | 1.70755800  |
| H | 4.79265500  | 5.97191500  | 2.37630800  |
| H | 4.36360200  | 6.10560100  | 0.66944700  |
| C | -4.94646300 | 3.57163000  | 2.76463900  |
| H | -4.79682100 | 3.59939300  | 1.68560700  |
| H | -5.90087800 | 4.05171900  | 3.00391200  |
| H | -4.15579500 | 4.15554800  | 3.24713800  |
| O | -2.25274900 | -1.52178100 | 2.56815900  |
| O | 5.52498700  | 0.53216500  | -1.73786500 |
| C | 5.54599800  | 3.17718900  | 2.17250200  |
| C | 5.76933500  | 1.86584100  | 1.80078600  |
| C | 5.45805500  | 3.47519700  | 3.56351400  |
| C | 5.92272800  | 0.82862500  | 2.76016100  |
| H | 5.82709900  | 1.59280300  | 0.75135200  |
| C | 5.58772500  | 2.49267400  | 4.51774300  |
| H | 5.28611200  | 4.49769900  | 3.88541500  |
| C | 6.18580400  | -0.51404700 | 2.37579500  |
| C | 5.82852600  | 1.14211700  | 4.15297200  |
| H | 5.51242800  | 2.74659700  | 5.57304700  |
| C | 6.34513600  | -1.50054000 | 3.32273600  |
| H | 6.26758700  | -0.75098400 | 1.31872600  |
| C | 5.98753900  | 0.10134000  | 5.10649500  |
| C | 6.24061800  | -1.19053100 | 4.70144800  |
| H | 6.55795500  | -2.51785500 | 3.00794000  |
| H | 5.91152100  | 0.34349700  | 6.16443900  |
| H | 6.36531500  | -1.97821000 | 5.44001300  |
| C | -5.84277800 | 1.18634700  | 2.51271300  |
| C | -5.49607800 | -0.12221600 | 2.24027300  |
| C | -7.13251500 | 1.63986100  | 2.10973200  |
| C | -6.39028300 | -1.01097500 | 1.58356300  |
| H | -4.51806900 | -0.50424200 | 2.51720700  |
| C | -8.01641600 | 0.80928000  | 1.46092300  |
| H | -7.43276900 | 2.66235200  | 2.31730300  |
| C | -6.04543700 | -2.36792800 | 1.33286000  |
| C | -7.68019000 | -0.54089800 | 1.17916300  |
| H | -8.99431900 | 1.18151100  | 1.16320200  |
| C | -6.93388200 | -3.21812800 | 0.71020600  |
| H | -5.07373800 | -2.72961000 | 1.65768600  |
| C | -8.56974800 | -1.43824000 | 0.52939200  |
| C | -8.20649300 | -2.74707300 | 0.30015100  |
| H | -6.66021500 | -4.25676100 | 0.54995100  |
| H | -9.54948300 | -1.07625900 | 0.22501000  |
| H | -8.90024400 | -3.42761400 | -0.18673400 |
| C | -2.54692000 | -0.12546500 | -2.33063500 |
| H | -2.51013300 | -0.85031900 | -1.52594300 |
| H | -1.96411700 | -0.39748300 | -3.20108800 |
| C | -2.69959000 | 1.25810800  | -1.98237300 |
| H | -2.66068500 | 1.50624100  | -0.92336400 |
| C | -2.95281500 | 2.19297000  | -2.94769600 |
| C | -3.20717600 | 1.66199900  | -4.33446600 |
| H | -3.43106200 | 2.45496600  | -5.04969800 |
| H | -2.31562900 | 1.13938500  | -4.70503300 |

|    |             |             |             |
|----|-------------|-------------|-------------|
| C  | -4.41016900 | 0.65949100  | -4.34193900 |
| H  | -4.44997400 | 0.18654800  | -5.32800000 |
| H  | -5.33582200 | 1.23601000  | -4.23636200 |
| C  | -4.41390400 | -0.39015200 | -3.24165700 |
| H  | -5.00372900 | -0.14056500 | -2.36292000 |
| C  | -4.19307900 | -1.74447400 | -3.43597200 |
| C  | -4.60848500 | -2.74466600 | -2.40504500 |
| H  | -5.03457200 | -2.28850000 | -1.50869400 |
| H  | -3.77064700 | -3.39467800 | -2.12634500 |
| H  | -5.36876100 | -3.40785700 | -2.84365900 |
| C  | -3.51337200 | -2.29436100 | -4.65238800 |
| H  | -3.02328000 | -1.53186900 | -5.26152500 |
| H  | -4.26156300 | -2.79720200 | -5.28283700 |
| H  | -2.78466500 | -3.06367500 | -4.37501000 |
| Cl | 0.39478000  | -0.38612400 | -1.69490900 |
| C  | -3.09662100 | 3.62682200  | -2.64197400 |
| C  | -2.90069000 | 4.60293800  | -3.63907400 |
| C  | -3.41050400 | 4.06383000  | -1.33719200 |
| C  | -3.01239300 | 5.95902400  | -3.35087500 |
| H  | -2.62186700 | 4.30882400  | -4.64542900 |
| C  | -3.53084100 | 5.41852300  | -1.05249100 |
| H  | -3.56767600 | 3.34375000  | -0.54162500 |
| C  | -3.33524000 | 6.37146800  | -2.05664000 |
| H  | -2.83955500 | 6.69643400  | -4.12743700 |
| H  | -3.77407300 | 5.73727700  | -0.04433200 |
| C  | -3.66363900 | -6.12402100 | 1.88186700  |
| C  | -1.30184100 | -5.76140000 | -2.53920100 |
| C  | 7.49289100  | -3.73061800 | -0.49274900 |
| C  | 2.86603400  | -5.60960600 | -1.04908500 |
| F  | 8.30260700  | -3.04238600 | -1.32549600 |
| F  | 7.74585500  | -3.26843900 | 0.76054600  |
| F  | 7.88671100  | -5.02240600 | -0.51893400 |
| F  | 3.32577600  | -6.65125800 | -0.32257700 |
| F  | 2.64390600  | -6.07024200 | -2.30266900 |
| F  | 1.65627000  | -5.26841100 | -0.54329700 |
| F  | -4.92655200 | -5.61580300 | 1.85609400  |
| F  | -3.23792600 | -6.02486600 | 3.15699800  |
| F  | -3.76546600 | -7.43587200 | 1.58383500  |
| F  | -0.08054100 | -5.39162100 | -2.96400300 |
| F  | -1.37710000 | -7.10334900 | -2.59683700 |
| F  | -2.19229900 | -5.28453100 | -3.46903800 |
| C  | -3.53000400 | 7.83392300  | -1.75594300 |
| F  | -2.78781500 | 8.61730900  | -2.56814700 |
| F  | -3.19741000 | 8.13270300  | -0.48214600 |
| F  | -4.82168400 | 8.20392100  | -1.92328200 |

### 13. X-Ray Crystallographic Information

Absolute configuration was assigned for compounds **2&3** by analogy to the reported crystal structure of **2d** (shown below).

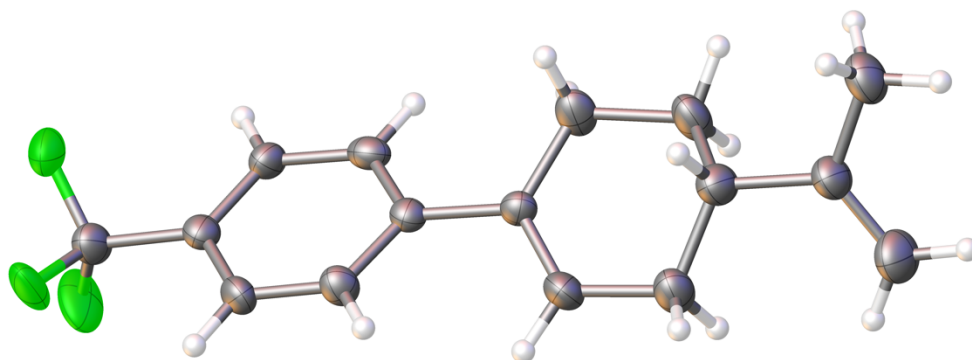

**X-ray Crystallography:** A crystal mounted on a diffractometer was collected data at 100 K. The intensities of the reflections were collected by means of a Bruker APEX DUO CCD diffractometer ( $\text{CuK}\alpha$  radiation,  $\lambda=1.54178 \text{ \AA}$ ), and equipped with an Oxford Cryosystems nitrogen flow apparatus. The collection method involved  $1.0^\circ$  scans in  $\omega$  at  $-30^\circ, -55^\circ, -80^\circ, 30^\circ, 55^\circ, 80^\circ$  and  $115^\circ$  in  $2\theta$ . Data integration down to  $0.84 \text{ \AA}$  resolution was carried out using SAINT V8.37 A (Bruker diffractometer, 2015) with reflection spot size optimization. Absorption corrections were made with the program SADABS (Bruker diffractometer, 2015). The structure was solved by the Intrinsic Phasing methods and refined by least-squares methods again  $F^2$  using SHELXT-2014 (Sheldrick, 2015) and SHELXL-2014 (Sheldrick, 2015) with OLEX 2 interface (Dolomanov, et al., 2009). Non-hydrogen atoms were refined anisotropically, and hydrogen atoms were allowed to ride on the respective atoms. Crystal data as well as details of data collection and refinement are summarized in Table 1, and geometric parameters are shown in Table 2. The Ortep plots produced with SHELXL-2014 program, and the other drawings were produced with Accelrys DS Visualizer 2.0 (Accelrys, 2007).

**Table 1. Experimental details**

|                             | DAS-I                                  |
|-----------------------------|----------------------------------------|
| Crystal data                |                                        |
| Chemical formula            | $\text{C}_{16}\text{H}_{17}\text{F}_3$ |
| $M_r$                       | 266.25                                 |
| Crystal system, space group | Triclinic, $P1$                        |
| Temperature (K)             | 100                                    |
| $a, b, c$ (Å)               | 7.9199 (2), 11.2795 (3), 14.9844 (4)   |
| $\alpha, \beta, \gamma$ (°) | 91.4157 (17), 90.3788 (19), 90.853 (2) |
| $V$ (Å <sup>3</sup> )       | 1338.00 (6)                            |
| $Z$                         | 4                                      |
| Radiation type              | $\text{Cu K}\alpha$                    |
| $\mu$ (mm <sup>-1</sup> )   | 0.88                                   |
| Crystal size (mm)           | $0.10 \times 0.08 \times 0.02$         |
|                             |                                        |

|                                                                            |                                                                                                                              |
|----------------------------------------------------------------------------|------------------------------------------------------------------------------------------------------------------------------|
| Data collection                                                            |                                                                                                                              |
| Diffractometer                                                             | Bruker D8 goniometer with CCD area detector                                                                                  |
| Absorption correction                                                      | Multi-scan<br><i>SADABS</i>                                                                                                  |
| $T_{\min}, T_{\max}$                                                       | 0.757, 0.840                                                                                                                 |
| No. of measured, independent and observed [ $I > 2\sigma(I)$ ] reflections | 27812, 8000, 6944                                                                                                            |
| $R_{\text{int}}$                                                           | 0.043                                                                                                                        |
| $(\sin \theta/\lambda)_{\text{max}}$ ( $\text{\AA}^{-1}$ )                 | 0.597                                                                                                                        |
| Refinement                                                                 |                                                                                                                              |
| $R[F^2 > 2\sigma(F^2)], wR(F^2), S$                                        | 0.051, 0.136, 1.03                                                                                                           |
| No. of reflections                                                         | 8000                                                                                                                         |
| No. of parameters                                                          | 807                                                                                                                          |
| No. of restraints                                                          | 1378                                                                                                                         |
| H-atom treatment                                                           | H-atom parameters constrained                                                                                                |
| $\Delta\rho_{\text{max}}, \Delta\rho_{\text{min}}$ ( $\text{e \AA}^{-3}$ ) | 0.37, -0.27                                                                                                                  |
| Absolute structure                                                         | Flack x determined using 2599 quotients [(I+)-(I-)]/[(I+)+(I-)] (Parsons, Flack and Wagner, Acta Cryst. B69 (2013) 249-259). |
| Absolute structure parameter                                               | -0.20 (11)                                                                                                                   |

Computer programs: *APEX3* v2016.9-0 (Bruker-AXS, 2016), *SAINT* 8.37A (Bruker-AXS, 2015), *SHELXT2014* (Sheldrick, 2015), *SHELXL2014* (Sheldrick, 2015), Bruker *SHELXTL* (Sheldrick, 2015).

**Table 2. Selected geometric parameters ( $\text{\AA}, ^\circ$ )**

|         |            |           |            |
|---------|------------|-----------|------------|
| C1—F2   | 1.299 (12) | C34A—C36A | 1.50 (2)   |
| C1—F3   | 1.332 (15) | C35A—H35D | 0.9500     |
| C1—F1   | 1.395 (12) | C35A—H35E | 0.9500     |
| C1—C2   | 1.497 (6)  | C36A—H36C | 0.9800     |
| C1A—F3A | 1.30 (2)   | C36A—H36D | 0.9800     |
| C1A—F2A | 1.33 (2)   | C36A—H36E | 0.9800     |
| C1A—F1A | 1.35 (2)   | C41—F9    | 1.32 (2)   |
| C1A—C2  | 1.497 (6)  | C41—F8    | 1.34 (2)   |
| C1B—F1B | 1.309 (10) | C41—F7    | 1.35 (2)   |
| C1B—F3B | 1.331 (13) | C41—C42   | 1.487 (6)  |
| C1B—F2B | 1.409 (11) | C41A—F7A  | 1.286 (8)  |
| C1B—C2  | 1.497 (6)  | C41A—F9A  | 1.313 (12) |
| C2—C3   | 1.385 (7)  | C41A—F8A  | 1.434 (9)  |
| C2—C7   | 1.393 (6)  | C41A—C42  | 1.487 (6)  |

|          |            |          |            |
|----------|------------|----------|------------|
| C3—C4    | 1.370 (6)  | C41B—F8B | 1.276 (12) |
| C4—C5    | 1.405 (6)  | C41B—F9B | 1.305 (18) |
| C4—H4    | 0.9500     | C41B—F7B | 1.477 (13) |
| C5—C6    | 1.402 (6)  | C41B—C42 | 1.487 (6)  |
| C5—C10   | 1.486 (6)  | C42—C43  | 1.382 (7)  |
| C6—C7    | 1.384 (6)  | C42—C47  | 1.387 (7)  |
| C6—H6    | 0.9500     | C43—C44  | 1.386 (6)  |
| C7—H7    | 0.9500     | C43—H43  | 0.9500     |
| C8—C13   | 1.518 (7)  | C44—C45  | 1.391 (6)  |
| C8—C9    | 1.525 (6)  | C44—H44  | 0.9500     |
| C8—H8A   | 0.9900     | C45—C46  | 1.409 (6)  |
| C8—H8B   | 0.9900     | C45—C50  | 1.487 (6)  |
| C9—C10   | 1.464 (6)  | C46—C47  | 1.389 (6)  |
| C9—H9A   | 0.9900     | C46—H46  | 0.9500     |
| C9—H9B   | 0.9900     | C47—H47  | 0.9500     |
| C10—C11  | 1.364 (6)  | C48—C49  | 1.503 (6)  |
| C11—C12  | 1.485 (6)  | C48—C53  | 1.535 (6)  |
| C11—H11  | 0.9500     | C48—H48A | 0.9900     |
| C12—C13  | 1.504 (6)  | C48—H48B | 0.9900     |
| C12—H12A | 0.9900     | C49—C50  | 1.332 (6)  |
| C12—H12B | 0.9900     | C49—H49  | 0.9500     |
| C13—C14  | 1.518 (6)  | C50—C51  | 1.513 (6)  |
| C13—H13  | 1.0000     | C51—C52  | 1.528 (6)  |
| C14—C15  | 1.327 (7)  | C51—H51A | 0.9900     |
| C14—C16  | 1.484 (7)  | C51—H51B | 0.9900     |
| C15—H15A | 0.9500     | C52—C53  | 1.523 (6)  |
| C15—H15B | 0.9500     | C52—H52A | 0.9900     |
| C16—H16A | 0.9800     | C52—H52B | 0.9900     |
| C16—H16B | 0.9800     | C53—C54  | 1.511 (6)  |
| C16—H16C | 0.9800     | C53—H53  | 1.0000     |
| C21—F5   | 1.325 (10) | C54—C55  | 1.317 (7)  |
| C21—F6   | 1.389 (13) | C54—C56  | 1.503 (6)  |
| C21—F4   | 1.396 (11) | C55—H55A | 0.9500     |
| C21—C22  | 1.489 (6)  | C55—H55B | 0.9500     |
| C21A—F4A | 1.283 (9)  | C56—H56A | 0.9800     |
| C21A—F6A | 1.312 (13) | C56—H56B | 0.9800     |
| C21A—F5A | 1.385 (10) | C56—H56C | 0.9800     |
| C21A—C22 | 1.489 (6)  | C61—F12  | 1.294 (8)  |
| C21B—F6B | 1.281 (12) | C61—F10  | 1.363 (8)  |
| C21B—F4B | 1.360 (15) | C61—F11  | 1.412 (8)  |

|           |            |           |            |
|-----------|------------|-----------|------------|
| C21B—F5B  | 1.378 (11) | C61—C62   | 1.474 (6)  |
| C21B—C22  | 1.489 (6)  | C61A—F10A | 1.263 (10) |
| C22—C23   | 1.389 (6)  | C61A—F12A | 1.324 (11) |
| C22—C27   | 1.389 (6)  | C61A—F11A | 1.388 (11) |
| C23—C24   | 1.373 (6)  | C61A—C62  | 1.474 (6)  |
| C23—H23   | 0.9500     | C61B—F10B | 1.293 (11) |
| C24—C25   | 1.394 (6)  | C61B—F11B | 1.351 (11) |
| C24—H24   | 0.9500     | C61B—F12B | 1.413 (12) |
| C25—C26   | 1.400 (6)  | C61B—C62  | 1.474 (6)  |
| C25—C30A  | 1.494 (6)  | C62—C63   | 1.387 (6)  |
| C25—C30   | 1.494 (6)  | C62—C67   | 1.393 (6)  |
| C26—C27   | 1.384 (6)  | C63—C64   | 1.384 (6)  |
| C26—H26   | 0.9500     | C63—H63   | 0.9500     |
| C27—H27   | 0.9500     | C64—C65   | 1.402 (6)  |
| C28—C33   | 1.50 (2)   | C64—H64   | 0.9500     |
| C28—C29   | 1.55 (2)   | C65—C66   | 1.401 (6)  |
| C28—H28A  | 0.9900     | C65—C70   | 1.495 (6)  |
| C28—H28B  | 0.9900     | C66—C67   | 1.384 (6)  |
| C29—C30   | 1.48 (2)   | C66—H66   | 0.9500     |
| C29—H29A  | 0.9900     | C67—H67   | 0.9500     |
| C29—H29B  | 0.9900     | C68—C73   | 1.513 (6)  |
| C30—C31   | 1.35 (2)   | C68—C69   | 1.514 (6)  |
| C31—C32   | 1.48 (2)   | C68—H68A  | 0.9900     |
| C31—H31   | 0.9500     | C68—H68B  | 0.9900     |
| C32—C33   | 1.553 (13) | C69—C70   | 1.325 (7)  |
| C32—H32A  | 0.9900     | C69—H69   | 0.9500     |
| C32—H32B  | 0.9900     | C70—C71   | 1.507 (6)  |
| C33—C34   | 1.517 (13) | C71—C72   | 1.532 (6)  |
| C33—H33   | 1.0000     | C71—H71A  | 0.9900     |
| C34—C36   | 1.340 (18) | C71—H71B  | 0.9900     |
| C34—C35   | 1.473 (18) | C72—C73   | 1.515 (6)  |
| C35—H35A  | 0.9800     | C72—H72A  | 0.9900     |
| C35—H35B  | 0.9800     | C72—H72B  | 0.9900     |
| C35—H35C  | 0.9800     | C73—C74A  | 1.526 (6)  |
| C36—H36A  | 0.9500     | C73—C74   | 1.526 (6)  |
| C36—H36B  | 0.9500     | C73—H73   | 1.0000     |
| C28A—C29A | 1.48 (4)   | C73—H73A  | 1.0000     |
| C28A—C33A | 1.54 (3)   | C74—C76   | 1.32 (2)   |
| C28A—H28C | 0.9900     | C74—C75   | 1.50 (2)   |
| C28A—H28D | 0.9900     | C75—H75A  | 0.9800     |

|             |            |                |            |
|-------------|------------|----------------|------------|
| C29A—C30A   | 1.37 (4)   | C75—H75B       | 0.9800     |
| C29A—H29C   | 0.9500     | C75—H75C       | 0.9800     |
| C30A—C31A   | 1.48 (3)   | C76—H76A       | 0.9500     |
| C31A—C32A   | 1.58 (4)   | C76—H76B       | 0.9500     |
| C31A—H31A   | 0.9900     | C74A—C75A      | 1.33 (2)   |
| C31A—H31B   | 0.9900     | C74A—C76A      | 1.48 (2)   |
| C32A—C33A   | 1.50 (2)   | C75A—H75D      | 0.9500     |
| C32A—H32C   | 0.9900     | C75A—H75E      | 0.9500     |
| C32A—H32D   | 0.9900     | C76A—H76C      | 0.9800     |
| C33A—C34A   | 1.52 (2)   | C76A—H76D      | 0.9800     |
| C33A—H33A   | 1.0000     | C76A—H76E      | 0.9800     |
| C34A—C35A   | 1.32 (2)   |                |            |
|             |            |                |            |
| F2—C1—F3    | 108.7 (16) | C28A—C33A—H33A | 106.6      |
| F2—C1—F1    | 106.7 (7)  | C35A—C34A—C36A | 121 (3)    |
| F3—C1—F1    | 101.7 (14) | C35A—C34A—C33A | 127 (6)    |
| F2—C1—C2    | 115.5 (7)  | C36A—C34A—C33A | 111 (5)    |
| F3—C1—C2    | 112.6 (17) | C34A—C35A—H35D | 120.0      |
| F1—C1—C2    | 110.5 (6)  | C34A—C35A—H35E | 120.0      |
| F3A—C1A—F2A | 108 (2)    | H35D—C35A—H35E | 120.0      |
| F3A—C1A—F1A | 109 (2)    | C34A—C36A—H36C | 109.5      |
| F2A—C1A—F1A | 105 (2)    | C34A—C36A—H36D | 109.5      |
| F3A—C1A—C2  | 116.0 (13) | H36C—C36A—H36D | 109.5      |
| F2A—C1A—C2  | 109.8 (16) | C34A—C36A—H36E | 109.5      |
| F1A—C1A—C2  | 108.4 (14) | H36C—C36A—H36E | 109.5      |
| F1B—C1B—F3B | 110.8 (13) | H36D—C36A—H36E | 109.5      |
| F1B—C1B—F2B | 105.5 (7)  | F9—C41—F8      | 108 (2)    |
| F3B—C1B—F2B | 101.1 (12) | F9—C41—F7      | 108 (3)    |
| F1B—C1B—C2  | 115.8 (6)  | F8—C41—F7      | 105 (3)    |
| F3B—C1B—C2  | 112.0 (15) | F9—C41—C42     | 115.4 (17) |
| F2B—C1B—C2  | 110.5 (6)  | F8—C41—C42     | 112.4 (19) |
| C3—C2—C7    | 119.4 (4)  | F7—C41—C42     | 107 (2)    |
| C3—C2—C1A   | 120.3 (4)  | F7A—C41A—F9A   | 112.9 (15) |
| C7—C2—C1A   | 120.2 (4)  | F7A—C41A—F8A   | 103.2 (6)  |
| C3—C2—C1B   | 120.3 (4)  | F9A—C41A—F8A   | 101.1 (12) |
| C7—C2—C1B   | 120.2 (4)  | F7A—C41A—C42   | 115.0 (5)  |
| C3—C2—C1    | 120.3 (4)  | F9A—C41A—C42   | 112.8 (16) |
| C7—C2—C1    | 120.2 (4)  | F8A—C41A—C42   | 110.4 (5)  |
| C4—C3—C2    | 120.6 (4)  | F8B—C41B—F9B   | 114 (2)    |
| C4—C3—H3    | 119.7      | F8B—C41B—F7B   | 102.9 (8)  |

|               |           |               |           |
|---------------|-----------|---------------|-----------|
| C2—C3—H3      | 119.7     | F9B—C41B—F7B  | 98 (2)    |
| C3—C4—C5      | 121.7 (4) | F8B—C41B—C42  | 115.9 (7) |
| C3—C4—H4      | 119.1     | F9B—C41B—C42  | 116 (2)   |
| C5—C4—H4      | 119.1     | F7B—C41B—C42  | 107.7 (6) |
| C6—C5—C4      | 116.7 (4) | C43—C42—C47   | 118.9 (4) |
| C6—C5—C10     | 122.2 (4) | C43—C42—C41A  | 120.3 (5) |
| C4—C5—C10     | 121.1 (4) | C47—C42—C41A  | 120.8 (4) |
| C7—C6—C5      | 121.9 (4) | C43—C42—C41B  | 120.3 (5) |
| C7—C6—H6      | 119.0     | C47—C42—C41B  | 120.8 (4) |
| C5—C6—H6      | 119.0     | C43—C42—C41   | 120.3 (5) |
| C6—C7—C2      | 119.6 (4) | C47—C42—C41   | 120.8 (4) |
| C6—C7—H7      | 120.2     | C42—C43—C44   | 120.8 (4) |
| C2—C7—H7      | 120.2     | C42—C43—H43   | 119.6     |
| C13—C8—C9     | 113.0 (4) | C44—C43—H43   | 119.6     |
| C13—C8—H8A    | 109.0     | C43—C44—C45   | 121.4 (4) |
| C9—C8—H8A     | 109.0     | C43—C44—H44   | 119.3     |
| C13—C8—H8B    | 109.0     | C45—C44—H44   | 119.3     |
| C9—C8—H8B     | 109.0     | C44—C45—C46   | 117.5 (4) |
| H8A—C8—H8B    | 107.8     | C44—C45—C50   | 120.3 (4) |
| C10—C9—C8     | 115.6 (4) | C46—C45—C50   | 122.1 (4) |
| C10—C9—H9A    | 108.4     | C47—C46—C45   | 120.7 (4) |
| C8—C9—H9A     | 108.4     | C47—C46—H46   | 119.7     |
| C10—C9—H9B    | 108.4     | C45—C46—H46   | 119.7     |
| C8—C9—H9B     | 108.4     | C42—C47—C46   | 120.8 (4) |
| H9A—C9—H9B    | 107.4     | C42—C47—H47   | 119.6     |
| C11—C10—C9    | 120.7 (4) | C46—C47—H47   | 119.6     |
| C11—C10—C5    | 120.2 (4) | C49—C48—C53   | 113.1 (4) |
| C9—C10—C5     | 119.1 (4) | C49—C48—H48A  | 109.0     |
| C10—C11—C12   | 123.6 (4) | C53—C48—H48A  | 109.0     |
| C10—C11—H11   | 118.2     | C49—C48—H48B  | 109.0     |
| C12—C11—H11   | 118.2     | C53—C48—H48B  | 109.0     |
| C11—C12—C13   | 113.2 (4) | H48A—C48—H48B | 107.8     |
| C11—C12—H12A  | 108.9     | C50—C49—C48   | 125.0 (4) |
| C13—C12—H12A  | 108.9     | C50—C49—H49   | 117.5     |
| C11—C12—H12B  | 108.9     | C48—C49—H49   | 117.5     |
| C13—C12—H12B  | 108.9     | C49—C50—C45   | 122.9 (4) |
| H12A—C12—H12B | 107.8     | C49—C50—C51   | 120.4 (4) |
| C12—C13—C8    | 109.7 (4) | C45—C50—C51   | 116.7 (4) |
| C12—C13—C14   | 116.3 (4) | C50—C51—C52   | 112.6 (4) |
| C8—C13—C14    | 111.8 (4) | C50—C51—H51A  | 109.1     |



|               |            |                |           |
|---------------|------------|----------------|-----------|
| C12—C13—H13   | 106.1      | C52—C51—H51A   | 109.1     |
| C8—C13—H13    | 106.1      | C50—C51—H51B   | 109.1     |
| C14—C13—H13   | 106.1      | C52—C51—H51B   | 109.1     |
| C15—C14—C16   | 121.5 (4)  | H51A—C51—H51B  | 107.8     |
| C15—C14—C13   | 122.9 (5)  | C53—C52—C51    | 111.3 (3) |
| C16—C14—C13   | 115.6 (4)  | C53—C52—H52A   | 109.4     |
| C14—C15—H15A  | 120.0      | C51—C52—H52A   | 109.4     |
| C14—C15—H15B  | 120.0      | C53—C52—H52B   | 109.4     |
| H15A—C15—H15B | 120.0      | C51—C52—H52B   | 109.4     |
| C14—C16—H16A  | 109.5      | H52A—C52—H52B  | 108.0     |
| C14—C16—H16B  | 109.5      | C54—C53—C52    | 115.8 (3) |
| H16A—C16—H16B | 109.5      | C54—C53—C48    | 111.1 (3) |
| C14—C16—H16C  | 109.5      | C52—C53—C48    | 108.2 (3) |
| H16A—C16—H16C | 109.5      | C54—C53—H53    | 107.1     |
| H16B—C16—H16C | 109.5      | C52—C53—H53    | 107.1     |
| F5—C21—F6     | 103.5 (10) | C48—C53—H53    | 107.1     |
| F5—C21—F4     | 112.3 (7)  | C55—C54—C56    | 121.5 (4) |
| F6—C21—F4     | 101.3 (8)  | C55—C54—C53    | 123.1 (4) |
| F5—C21—C22    | 115.9 (6)  | C56—C54—C53    | 115.4 (4) |
| F6—C21—C22    | 109.6 (9)  | C54—C55—H55A   | 120.0     |
| F4—C21—C22    | 112.8 (6)  | C54—C55—H55B   | 120.0     |
| F4A—C21A—F6A  | 114.3 (9)  | H55A—C55—H55B  | 120.0     |
| F4A—C21A—F5A  | 107.6 (7)  | C54—C56—H56A   | 109.5     |
| F6A—C21A—F5A  | 100.2 (9)  | C54—C56—H56B   | 109.5     |
| F4A—C21A—C22  | 112.6 (6)  | H56A—C56—H56B  | 109.5     |
| F6A—C21A—C22  | 112.8 (9)  | C54—C56—H56C   | 109.5     |
| F5A—C21A—C22  | 108.3 (5)  | H56A—C56—H56C  | 109.5     |
| F6B—C21B—F4B  | 104.2 (10) | H56B—C56—H56C  | 109.5     |
| F6B—C21B—F5B  | 105.7 (9)  | F12—C61—F10    | 107.3 (6) |
| F4B—C21B—F5B  | 100.2 (9)  | F12—C61—F11    | 104.0 (6) |
| F6B—C21B—C22  | 118.8 (7)  | F10—C61—F11    | 102.1 (6) |
| F4B—C21B—C22  | 112.2 (8)  | F12—C61—C62    | 116.0 (5) |
| F5B—C21B—C22  | 113.6 (6)  | F10—C61—C62    | 113.8 (4) |
| C23—C22—C27   | 119.5 (4)  | F11—C61—C62    | 112.3 (4) |
| C23—C22—C21A  | 121.5 (4)  | F10A—C61A—F12A | 115.8 (8) |
| C27—C22—C21A  | 119.0 (4)  | F10A—C61A—F11A | 105.0 (8) |
| C23—C22—C21B  | 121.5 (4)  | F12A—C61A—F11A | 98.7 (7)  |
| C27—C22—C21B  | 119.0 (4)  | F10A—C61A—C62  | 114.6 (6) |
| C23—C22—C21   | 121.5 (4)  | F12A—C61A—C62  | 112.6 (6) |
| C27—C22—C21   | 119.0 (4)  | F11A—C61A—C62  | 108.3 (5) |

|               |            |                |           |
|---------------|------------|----------------|-----------|
| C24—C23—C22   | 120.1 (4)  | F10B—C61B—F11B | 114.2 (9) |
| C24—C23—H23   | 120.0      | F10B—C61B—F12B | 106.4 (8) |
| C22—C23—H23   | 120.0      | F11B—C61B—F12B | 98.1 (9)  |
| C23—C24—C25   | 122.0 (4)  | F10B—C61B—C62  | 112.7 (6) |
| C23—C24—H24   | 119.0      | F11B—C61B—C62  | 113.7 (6) |
| C25—C24—H24   | 119.0      | F12B—C61B—C62  | 110.6 (7) |
| C24—C25—C26   | 117.0 (4)  | C63—C62—C67    | 119.0 (4) |
| C24—C25—C30A  | 122.1 (4)  | C63—C62—C61A   | 121.7 (4) |
| C26—C25—C30A  | 120.9 (4)  | C67—C62—C61A   | 119.2 (4) |
| C24—C25—C30   | 122.1 (4)  | C63—C62—C61B   | 121.7 (4) |
| C26—C25—C30   | 120.9 (4)  | C67—C62—C61B   | 119.2 (4) |
| C27—C26—C25   | 121.6 (4)  | C63—C62—C61    | 121.7 (4) |
| C27—C26—H26   | 119.2      | C67—C62—C61    | 119.2 (4) |
| C25—C26—H26   | 119.2      | C64—C63—C62    | 120.5 (4) |
| C26—C27—C22   | 119.8 (4)  | C64—C63—H63    | 119.7     |
| C26—C27—H27   | 120.1      | C62—C63—H63    | 119.7     |
| C22—C27—H27   | 120.1      | C63—C64—C65    | 121.5 (4) |
| C33—C28—C29   | 111 (2)    | C63—C64—H64    | 119.2     |
| C33—C28—H28A  | 109.5      | C65—C64—H64    | 119.2     |
| C29—C28—H28A  | 109.5      | C66—C65—C64    | 116.9 (4) |
| C33—C28—H28B  | 109.5      | C66—C65—C70    | 121.1 (4) |
| C29—C28—H28B  | 109.5      | C64—C65—C70    | 122.0 (4) |
| H28A—C28—H28B | 108.1      | C67—C66—C65    | 121.9 (4) |
| C30—C29—C28   | 114 (2)    | C67—C66—H66    | 119.1     |
| C30—C29—H29A  | 108.9      | C65—C66—H66    | 119.1     |
| C28—C29—H29A  | 108.9      | C66—C67—C62    | 120.1 (4) |
| C30—C29—H29B  | 108.9      | C66—C67—H67    | 119.9     |
| C28—C29—H29B  | 108.9      | C62—C67—H67    | 119.9     |
| H29A—C29—H29B | 107.7      | C73—C68—C69    | 111.2 (4) |
| C31—C30—C29   | 121.3 (13) | C73—C68—H68A   | 109.4     |
| C31—C30—C25   | 122.9 (9)  | C69—C68—H68A   | 109.4     |
| C29—C30—C25   | 115.7 (13) | C73—C68—H68B   | 109.4     |
| C30—C31—C32   | 124.2 (16) | C69—C68—H68B   | 109.4     |
| C30—C31—H31   | 117.9      | H68A—C68—H68B  | 108.0     |
| C32—C31—H31   | 117.9      | C70—C69—C68    | 124.4 (4) |
| C31—C32—C33   | 111.8 (11) | C70—C69—H69    | 117.8     |
| C31—C32—H32A  | 109.3      | C68—C69—H69    | 117.8     |
| C33—C32—H32A  | 109.3      | C69—C70—C65    | 121.3 (4) |
| C31—C32—H32B  | 109.3      | C69—C70—C71    | 120.8 (4) |
| C33—C32—H32B  | 109.3      | C65—C70—C71    | 117.9 (4) |

|                |            |                |           |
|----------------|------------|----------------|-----------|
| H32A—C32—H32B  | 107.9      | C70—C71—C72    | 113.7 (4) |
| C28—C33—C34    | 113.9 (19) | C70—C71—H71A   | 108.8     |
| C28—C33—C32    | 108.3 (14) | C72—C71—H71A   | 108.8     |
| C34—C33—C32    | 111.5 (12) | C70—C71—H71B   | 108.8     |
| C28—C33—H33    | 107.6      | C72—C71—H71B   | 108.8     |
| C34—C33—H33    | 107.6      | H71A—C71—H71B  | 107.7     |
| C32—C33—H33    | 107.6      | C73—C72—C71    | 111.7 (4) |
| C36—C34—C35    | 122 (2)    | C73—C72—H72A   | 109.3     |
| C36—C34—C33    | 124 (3)    | C71—C72—H72A   | 109.3     |
| C35—C34—C33    | 115 (3)    | C73—C72—H72B   | 109.3     |
| C34—C35—H35A   | 109.5      | C71—C72—H72B   | 109.3     |
| C34—C35—H35B   | 109.5      | H72A—C72—H72B  | 107.9     |
| H35A—C35—H35B  | 109.5      | C68—C73—C72    | 108.1 (4) |
| C34—C35—H35C   | 109.5      | C68—C73—C74A   | 113.3 (4) |
| H35A—C35—H35C  | 109.5      | C72—C73—C74A   | 112.8 (4) |
| H35B—C35—H35C  | 109.5      | C68—C73—C74    | 113.3 (4) |
| C34—C36—H36A   | 120.0      | C72—C73—C74    | 112.8 (4) |
| C34—C36—H36B   | 120.0      | C68—C73—H73    | 107.5     |
| H36A—C36—H36B  | 120.0      | C72—C73—H73    | 107.5     |
| C29A—C28A—C33A | 115 (5)    | C74—C73—H73    | 107.5     |
| C29A—C28A—H28C | 108.6      | C68—C73—H73A   | 107.5     |
| C33A—C28A—H28C | 108.6      | C72—C73—H73A   | 107.5     |
| C29A—C28A—H28D | 108.6      | C74A—C73—H73A  | 107.5     |
| C33A—C28A—H28D | 108.6      | C76—C74—C75    | 122 (2)   |
| H28C—C28A—H28D | 107.6      | C76—C74—C73    | 123 (3)   |
| C30A—C29A—C28A | 126 (5)    | C75—C74—C73    | 115 (2)   |
| C30A—C29A—H29C | 117.0      | C74—C75—H75A   | 109.5     |
| C28A—C29A—H29C | 117.0      | C74—C75—H75B   | 109.5     |
| C29A—C30A—C31A | 120 (3)    | H75A—C75—H75B  | 109.5     |
| C29A—C30A—C25  | 123 (3)    | C74—C75—H75C   | 109.5     |
| C31A—C30A—C25  | 116.1 (15) | H75A—C75—H75C  | 109.5     |
| C30A—C31A—C32A | 112 (2)    | H75B—C75—H75C  | 109.5     |
| C30A—C31A—H31A | 109.2      | C74—C76—H76A   | 120.0     |
| C32A—C31A—H31A | 109.2      | C74—C76—H76B   | 120.0     |
| C30A—C31A—H31B | 109.2      | H76A—C76—H76B  | 120.0     |
| C32A—C31A—H31B | 109.2      | C75A—C74A—C76A | 122 (3)   |
| H31A—C31A—H31B | 107.9      | C75A—C74A—C73  | 119 (3)   |
| C33A—C32A—C31A | 115 (2)    | C76A—C74A—C73  | 119 (2)   |
| C33A—C32A—H32C | 108.6      | C74A—C75A—H75D | 120.0     |
| C31A—C32A—H32C | 108.6      | C74A—C75A—H75E | 120.0     |

|                |             |                     |             |
|----------------|-------------|---------------------|-------------|
| C33A—C32A—H32D | 108.6       | H75D—C75A—H75E      | 120.0       |
| C31A—C32A—H32D | 108.6       | C74A—C76A—H76C      | 109.5       |
| H32C—C32A—H32D | 107.6       | C74A—C76A—H76D      | 109.5       |
| C32A—C33A—C34A | 115 (3)     | H76C—C76A—H76D      | 109.5       |
| C32A—C33A—C28A | 109 (3)     | C74A—C76A—H76E      | 109.5       |
| C34A—C33A—C28A | 113 (3)     | H76C—C76A—H76E      | 109.5       |
| C32A—C33A—H33A | 106.6       | H76D—C76A—H76E      | 109.5       |
| C34A—C33A—H33A | 106.6       |                     |             |
|                |             |                     |             |
| F3A—C1A—C2—C3  | 179.7 (19)  | C31A—C32A—C33A—C28A | 56 (3)      |
| F2A—C1A—C2—C3  | -57 (2)     | C29A—C28A—C33A—C32A | -37 (5)     |
| F1A—C1A—C2—C3  | 56.9 (18)   | C29A—C28A—C33A—C34A | -166 (5)    |
| F3A—C1A—C2—C7  | -1.9 (19)   | C32A—C33A—C34A—C35A | -16 (7)     |
| F2A—C1A—C2—C7  | 121 (2)     | C28A—C33A—C34A—C35A | 110 (7)     |
| F1A—C1A—C2—C7  | -124.7 (18) | C32A—C33A—C34A—C36A | 173 (5)     |
| F1B—C1B—C2—C3  | -8.0 (10)   | C28A—C33A—C34A—C36A | -62 (6)     |
| F3B—C1B—C2—C3  | 120.3 (11)  | F7A—C41A—C42—C43    | 91.5 (8)    |
| F2B—C1B—C2—C3  | -127.9 (7)  | F9A—C41A—C42—C43    | -137.1 (13) |
| F1B—C1B—C2—C7  | 170.3 (8)   | F8A—C41A—C42—C43    | -24.8 (7)   |
| F3B—C1B—C2—C7  | -61.4 (12)  | F7A—C41A—C42—C47    | -87.4 (8)   |
| F2B—C1B—C2—C7  | 50.5 (8)    | F9A—C41A—C42—C47    | 44.1 (14)   |
| F2—C1—C2—C3    | -95.5 (11)  | F8A—C41A—C42—C47    | 156.3 (6)   |
| F3—C1—C2—C3    | 138.7 (15)  | F8B—C41B—C42—C43    | 14.5 (11)   |
| F1—C1—C2—C3    | 25.7 (9)    | F9B—C41B—C42—C43    | -122 (2)    |
| F2—C1—C2—C7    | 82.8 (11)   | F7B—C41B—C42—C43    | 129.1 (7)   |
| F3—C1—C2—C7    | -43.0 (15)  | F8B—C41B—C42—C47    | -164.4 (9)  |
| F1—C1—C2—C7    | -156.0 (8)  | F9B—C41B—C42—C47    | 59 (2)      |
| C7—C2—C3—C4    | 0.9 (7)     | F7B—C41B—C42—C47    | -49.8 (7)   |
| C1A—C2—C3—C4   | 179.3 (4)   | F9—C41—C42—C43      | 177 (2)     |
| C1B—C2—C3—C4   | 179.3 (4)   | F8—C41—C42—C43      | -58 (2)     |
| C1—C2—C3—C4    | 179.3 (4)   | F7—C41—C42—C43      | 56 (3)      |
| C2—C3—C4—C5    | -1.5 (7)    | F9—C41—C42—C47      | -2 (2)      |
| C3—C4—C5—C6    | 1.3 (7)     | F8—C41—C42—C47      | 123 (2)     |
| C3—C4—C5—C10   | -178.3 (4)  | F7—C41—C42—C47      | -122 (3)    |
| C4—C5—C6—C7    | -0.5 (6)    | C47—C42—C43—C44     | -1.0 (7)    |
| C10—C5—C6—C7   | 179.0 (4)   | C41A—C42—C43—C44    | -179.9 (4)  |
| C5—C6—C7—C2    | 0.0 (6)     | C41B—C42—C43—C44    | -179.9 (4)  |
| C3—C2—C7—C6    | -0.2 (6)    | C41—C42—C43—C44     | -179.9 (4)  |
| C1A—C2—C7—C6   | -178.5 (4)  | C42—C43—C44—C45     | 0.7 (7)     |
| C1B—C2—C7—C6   | -178.5 (4)  | C43—C44—C45—C46     | 0.0 (6)     |

|                  |            |                   |            |
|------------------|------------|-------------------|------------|
| C1—C2—C7—C6      | -178.5 (4) | C43—C44—C45—C50   | 179.2 (4)  |
| C13—C8—C9—C10    | -36.5 (6)  | C44—C45—C46—C47   | -0.4 (6)   |
| C8—C9—C10—C11    | 8.2 (7)    | C50—C45—C46—C47   | -179.5 (4) |
| C8—C9—C10—C5     | -171.0 (4) | C43—C42—C47—C46   | 0.6 (7)    |
| C6—C5—C10—C11    | -156.2 (4) | C41A—C42—C47—C46  | 179.5 (4)  |
| C4—C5—C10—C11    | 23.3 (7)   | C41B—C42—C47—C46  | 179.5 (4)  |
| C6—C5—C10—C9     | 23.0 (6)   | C41—C42—C47—C46   | 179.5 (4)  |
| C4—C5—C10—C9     | -157.5 (4) | C45—C46—C47—C42   | 0.1 (6)    |
| C9—C10—C11—C12   | -0.4 (8)   | C53—C48—C49—C50   | 13.8 (6)   |
| C5—C10—C11—C12   | 178.8 (4)  | C48—C49—C50—C45   | -177.2 (4) |
| C10—C11—C12—C13  | 21.2 (7)   | C48—C49—C50—C51   | 0.9 (7)    |
| C11—C12—C13—C8   | -47.7 (6)  | C44—C45—C50—C49   | 162.5 (4)  |
| C11—C12—C13—C14  | -175.7 (4) | C46—C45—C50—C49   | -18.4 (6)  |
| C9—C8—C13—C12    | 56.0 (6)   | C44—C45—C50—C51   | -15.7 (6)  |
| C9—C8—C13—C14    | -173.5 (4) | C46—C45—C50—C51   | 163.4 (4)  |
| C12—C13—C14—C15  | 16.5 (8)   | C49—C50—C51—C52   | 16.3 (6)   |
| C8—C13—C14—C15   | -110.5 (6) | C45—C50—C51—C52   | -165.4 (4) |
| C12—C13—C14—C16  | -161.9 (5) | C50—C51—C52—C53   | -48.5 (5)  |
| C8—C13—C14—C16   | 71.1 (6)   | C51—C52—C53—C54   | -172.3 (4) |
| F4A—C21A—C22—C23 | 84.8 (8)   | C51—C52—C53—C48   | 62.3 (5)   |
| F6A—C21A—C22—C23 | -144.1 (8) | C49—C48—C53—C54   | -172.2 (4) |
| F5A—C21A—C22—C23 | -34.1 (7)  | C49—C48—C53—C52   | -44.0 (5)  |
| F4A—C21A—C22—C27 | -95.3 (8)  | C52—C53—C54—C55   | -7.8 (7)   |
| F6A—C21A—C22—C27 | 35.8 (10)  | C48—C53—C54—C55   | 116.2 (5)  |
| F5A—C21A—C22—C27 | 145.8 (7)  | C52—C53—C54—C56   | 171.1 (4)  |
| F6B—C21B—C22—C23 | -89.8 (9)  | C48—C53—C54—C56   | -64.9 (5)  |
| F4B—C21B—C22—C23 | 148.4 (8)  | F10A—C61A—C62—C63 | -116.3 (9) |
| F5B—C21B—C22—C23 | 35.5 (10)  | F12A—C61A—C62—C63 | 18.9 (9)   |
| F6B—C21B—C22—C27 | 90.1 (9)   | F11A—C61A—C62—C63 | 126.9 (7)  |
| F4B—C21B—C22—C27 | -31.7 (9)  | F10A—C61A—C62—C67 | 63.9 (9)   |
| F5B—C21B—C22—C27 | -144.6 (9) | F12A—C61A—C62—C67 | -160.9 (7) |
| F5—C21—C22—C23   | -7.3 (10)  | F11A—C61A—C62—C67 | -52.9 (8)  |
| F6—C21—C22—C23   | -123.8 (8) | F10B—C61B—C62—C63 | -73.9 (9)  |
| F4—C21—C22—C23   | 124.2 (8)  | F11B—C61B—C62—C63 | 154.1 (9)  |
| F5—C21—C22—C27   | 172.6 (9)  | F12B—C61B—C62—C63 | 45.0 (9)   |
| F6—C21—C22—C27   | 56.1 (9)   | F10B—C61B—C62—C67 | 106.3 (8)  |
| F4—C21—C22—C27   | -55.9 (9)  | F11B—C61B—C62—C67 | -25.7 (10) |
| C27—C22—C23—C24  | 0.3 (7)    | F12B—C61B—C62—C67 | -134.8 (8) |
| C21A—C22—C23—C24 | -179.8 (4) | F12—C61—C62—C63   | 93.0 (7)   |
| C21B—C22—C23—C24 | -179.8 (4) | F10—C61—C62—C63   | -32.2 (8)  |

|                     |             |                   |            |
|---------------------|-------------|-------------------|------------|
| C21—C22—C23—C24     | -179.8 (4)  | F11—C61—C62—C63   | -147.5 (6) |
| C22—C23—C24—C25     | -0.2 (7)    | F12—C61—C62—C67   | -86.8 (7)  |
| C23—C24—C25—C26     | -0.4 (7)    | F10—C61—C62—C67   | 148.1 (6)  |
| C23—C24—C25—C30A    | 178.7 (4)   | F11—C61—C62—C67   | 32.7 (7)   |
| C23—C24—C25—C30     | 178.7 (4)   | C67—C62—C63—C64   | 0.5 (7)    |
| C24—C25—C26—C27     | 0.8 (7)     | C61A—C62—C63—C64  | -179.3 (4) |
| C30A—C25—C26—C27    | -178.3 (4)  | C61B—C62—C63—C64  | -179.3 (4) |
| C30—C25—C26—C27     | -178.3 (4)  | C61—C62—C63—C64   | -179.3 (4) |
| C25—C26—C27—C22     | -0.7 (7)    | C62—C63—C64—C65   | 0.3 (7)    |
| C23—C22—C27—C26     | 0.1 (7)     | C63—C64—C65—C66   | -1.4 (6)   |
| C21A—C22—C27—C26    | -179.8 (4)  | C63—C64—C65—C70   | 179.3 (4)  |
| C21B—C22—C27—C26    | -179.8 (4)  | C64—C65—C66—C67   | 1.9 (7)    |
| C21—C22—C27—C26     | -179.8 (4)  | C70—C65—C66—C67   | -178.8 (4) |
| C33—C28—C29—C30     | -42 (3)     | C65—C66—C67—C62   | -1.2 (7)   |
| C28—C29—C30—C31     | 4 (3)       | C63—C62—C67—C66   | 0.0 (7)    |
| C28—C29—C30—C25     | -170.7 (16) | C61A—C62—C67—C66  | 179.8 (4)  |
| C24—C25—C30—C31     | -13.1 (12)  | C61B—C62—C67—C66  | 179.8 (4)  |
| C26—C25—C30—C31     | 165.9 (11)  | C61—C62—C67—C66   | 179.8 (4)  |
| C24—C25—C30—C29     | 161.7 (15)  | C73—C68—C69—C70   | 18.8 (7)   |
| C26—C25—C30—C29     | -19.3 (16)  | C68—C69—C70—C65   | -175.5 (4) |
| C29—C30—C31—C32     | 10 (3)      | C68—C69—C70—C71   | 5.6 (8)    |
| C25—C30—C31—C32     | -175.1 (10) | C66—C65—C70—C69   | 17.2 (7)   |
| C30—C31—C32—C33     | 12 (2)      | C64—C65—C70—C69   | -163.6 (5) |
| C29—C28—C33—C34     | -172.4 (19) | C66—C65—C70—C71   | -163.9 (5) |
| C29—C28—C33—C32     | 63 (2)      | C64—C65—C70—C71   | 15.3 (6)   |
| C31—C32—C33—C28     | -48.4 (17)  | C69—C70—C71—C72   | 4.7 (7)    |
| C31—C32—C33—C34     | -174.4 (18) | C65—C70—C71—C72   | -174.2 (4) |
| C28—C33—C34—C36     | -22 (4)     | C70—C71—C72—C73   | -39.2 (6)  |
| C32—C33—C34—C36     | 101 (3)     | C69—C68—C73—C72   | -51.3 (6)  |
| C28—C33—C34—C35     | 162 (3)     | C69—C68—C73—C74A  | -177.1 (4) |
| C32—C33—C34—C35     | -75 (3)     | C69—C68—C73—C74   | -177.1 (4) |
| C33A—C28A—C29A—C30A | 7 (8)       | C71—C72—C73—C68   | 62.8 (6)   |
| C28A—C29A—C30A—C31A | 6 (7)       | C71—C72—C73—C74A  | -171.2 (4) |
| C28A—C29A—C30A—C25  | 177 (4)     | C71—C72—C73—C74   | -171.2 (4) |
| C24—C25—C30A—C29A   | 161 (3)     | C68—C73—C74—C76   | 33 (3)     |
| C26—C25—C30A—C29A   | -20 (3)     | C72—C73—C74—C76   | -91 (3)    |
| C24—C25—C30A—C31A   | -27 (2)     | C68—C73—C74—C75   | -143 (3)   |
| C26—C25—C30A—C31A   | 152 (2)     | C72—C73—C74—C75   | 93 (3)     |
| C29A—C30A—C31A—C32A | 12 (5)      | C68—C73—C74A—C75A | -146 (3)   |
| C25—C30A—C31A—C32A  | -159.8 (18) | C72—C73—C74A—C75A | 91 (3)     |

|                     |          |                   |         |
|---------------------|----------|-------------------|---------|
| C30A—C31A—C32A—C33A | -45 (3)  | C68—C73—C74A—C76A | 44 (2)  |
| C31A—C32A—C33A—C34A | -176 (3) | C72—C73—C74A—C76A | -80 (2) |

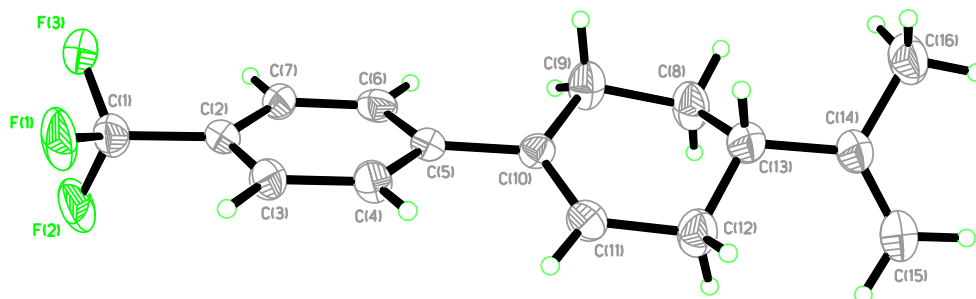

Figure S28. Perspective views showing 50% probability displacement

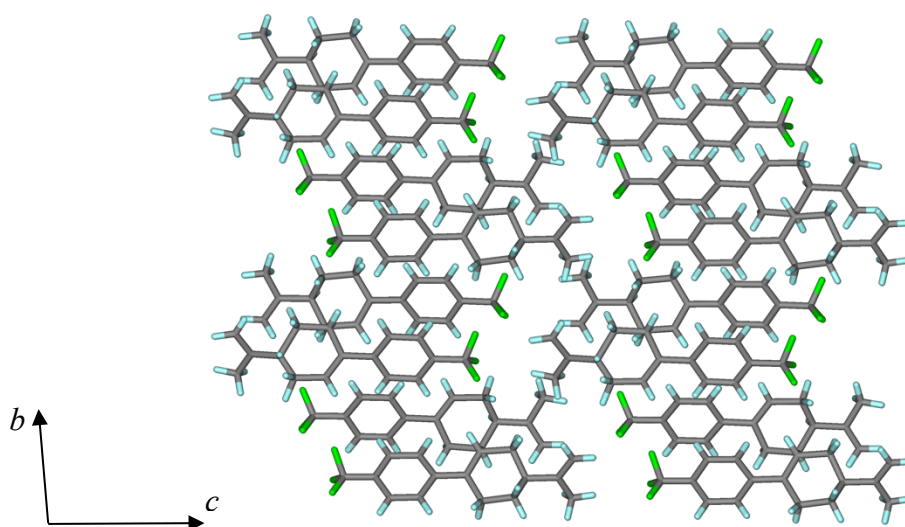

Figure S29. Three-dimensional supramolecular architecture viewed along the *a*-axis direction.

### Crystallographic References:

- [1] Bruker AXS APEX3, Bruker AXS, Madison, Wisconsin, 2015.
- [2] O. V. Dolomanov, L. J. Bourhis, R. J. Gildea, J. A. K. Howard and H. Puschmann *J. Appl. Cryst.* 2009, 42, 339-341.
- [3] G. M. Sheldrick, *Acta Cryst.* 2015, A71, 3-8.
- [4] G. M. Sheldrick, *Acta Cryst.* 2015, C71, 3-8.
- [5] Accelrys DS Visualizer v2.0.1, Accelrys Software. Inc., 2007.

## 14. References

- [1] Kim, H. Y.; Oh, K. *Org. Lett.* **2011**, *13*, 1306.
- [2] Huy, P. H.; Motsch, S.; Kappler, S. M. *Angew. Chemie Int. Ed.* **2016**, *55*, 10145.
- [3] Nakatsuji, H.; Ueno, K.; Misaki, T.; Tanabe, Y. *Org. Lett.* **2008**, *10*, 2131.
- [4] Thulasiram, H. V.; Phan, R. M.; Rivera, S. B.; Poulter, C. D. *J. Org. Chem.* **2006**, *71*, 1739.
- [5] De Mattos, M. C. S.; Sanseverino, A. M. *Synth. Commun.* **2000**, *30*, 1975.
- [6] (a) Rieke, R. D.; Daruwala, K. P. *J. Org. Chem.* **1988**, *53*, 2073. (b) Rieke, R. D.; Schulte, L. D.; Dawson, B. T.; Yang, S. S. *J. Am. Chem. Soc.* **1990**, *112*, 8388. (c) Kiyokawa, K.; Hata, S.; Kainuma, S.; Minakata, S. *Chem. Commun.* **2019**, *55*, 458. (d) Altenhofer, E. F. and Harmata, M. *J. Org. Chem.* **2015**, *80*, 8168.
- [7] Hansch, C.; Leo, A.; Taft, R. W. *Chem. Rev.* **1991**, *91*, 165.
- [8] Singleton, D. A.; Thomas, A. *J. Am. Chem. Soc.* **1995**, *117*, 9357.
- [9] Blackmond, D. G. *Angew. Chemie Int. Ed.* **2005**, *44*, 4302.
- [10] Gaussian 16, Revision A.03, M. J. Frisch, G. W. Trucks, H. B. Schlegel, G. E. Scuseria, M. A. Robb, J. R. Cheeseman, G. Scalmani, V. Barone, G. A. Petersson, H. Nakatsuji, X. Li, M. Caricato, A. V. Marenich, J. Bloino, B. G. Janesko, R. Gomperts, B. Mennucci, H. P. Hratchian, J. V. Ortiz, A. F. Izmaylov, J. L. Sonnenberg, D. Williams-Young, F. Ding, F. Lipparini, F. Egidi, J. Goings, B. Peng, A. Petrone, T. Henderson, D. Ranasinghe, V. G. Zakrzewski, J. Gao, N. Rega, G. Zheng, W. Liang, M. Hada, M. Ehara, K. Toyota, R. Fukuda, J. Hasegawa, M. Ishida, T. Nakajima, Y. Honda, O. Kitao, H. Nakai, T. Vreven, K. Throssell, J. A. Montgomery, Jr., J. E. Peralta, F. Ogliaro, M. J. Bearpark, J. J. Heyd, E. N. Brothers, K. N. Kudin, V. N. Staroverov, T. A. Keith, R. Kobayashi, J. Normand, K. Raghavachari, A. P. Rendell, J. C. Burant, S. S. Iyengar, J. Tomasi, M. Cossi, J. M. Millam, M. Klene, C. Adamo, R. Cammi, J. W. Ochterski, R. L. Martin, K. Morokuma, O. Farkas, J. B. Foresman, and D. J. Fox, Gaussian, Inc., Wallingford CT, 2016.
- [11] (a) Becke, A. D. *Phys. Rev. A* **1988**, *38*, 3098. (b) Lee, C.; Yang, W.; Parr, R. G. *Phys. Rev. B* **1988**, *37*, 785. (c) Becke, A. D. *J. Chem. Phys.* **1993**, *98*, 5648. (d) Stephens, P. J.; Devlin, F. J.; Chabalowski, C. F.; Frisch, M. J. *J. Phys. Chem.* **1994**, *98*, 11623.
- [12] Tantillo, D. J. *Nat. Prod. Rep.* **2011**, *28*, 1035.
- [13] S. Grimme, *Chem. Eur. J.* **2012**, *18*, 9955.
- [14] Ribeiro, R. F.; Marenich, A. V.; Cramer, C. J.; Truhlar, D. G. *J. Phys. Chem. B* **2011**, *115*, 14556.
- [15] I. Funes-Ardoiz, R. S. Paton, GoodVibes, v2.0.2; May 2018, doi:10.5281/zenodo.1247565
- [16] (a) Mennucci, B.; Cancès, E.; Tomasi, J. *J. Phys. Chem. B.* **1997**, *101*, 10506. (b) Johnson, E. R.; Becke, A. D. *J. Chem. Phys.* **2005**, *123*, 024101. (c) Johnson, E. R.; Becke, A. D. *J. Chem. Phys.* **2006**, *124*, 174104. (d) Grimme, S.; Antony, J.; Ehrlich, S.; Krieg, H. *J. Chem. Phys.* **2010**, *132*, 154104. (e) Grimme, S.; Ehrlich, S.; Goerigk, L. *J. Comput. Chem.* **2011**, *32*, 1456.
- [17] (a) Becke, A. D. *J. Chem. Phys.* **1997**, *107*, 8554. (b) Grimme, S. *J. Comput. Chem.* **2006**, *27*, 1787. (c) Weigend, F.; Ahlrichs, R. *Phys. Chem. Chem. Phys.* **2005**, *7*, 3297. (d) Marenich, A. V.; Cramer, C. J.; Truhlar, D. G. *J. Phys. Chem. B* **2009**, *113*, 6378. (e) Zhao, Y.; Truhlar, D. G. *Theor. Chem. Acc.* **2008**, *120*, 215. (f) Chai, J.-D.; Head-Gordon, M. *Phys. Chem. Chem. Phys.* **2008**, *10*, 6615.
- [18] Tantillo, D. J. *J. Phy. Org. Chem.* **2008**, *21*, 561.
- [19] Johnson, E. R.; Keinan, S.; Mori-Sanchez, P.; Contreras-Garcia, J.; Cohen, A. J.; Yang, W. *J. Am. Chem. Soc.* **2010**, *132*, 6498.
- [20] Lu, T.; Chen, F. *J. Comput. Chem.* **2012**, *33*, 580.



- [21] C. Y. Legault, CYLview, 1.0b; Université de Sherbrooke, 2009 (<http://www.cylview.org>).
- [22] Humphrey, W.; Dalke, A.; Schulten, K. VMD – Visual Molecular Dynamics. *J. Molec. Graphics* **1996**, *14*, 33.
- [23] Ford, D. D.; Lehnerr, D.; Kennedy, C. R.; Jacobsen, E. N. *J. Am. Chem. Soc.* **2016**, *138*, 7860.
- [24] (a) Godtfredsen, S.; Obrecht, J. P.; Arigoni, D. *Chimia* **1977**, *31*, 62. (b) Winstein, S.; Valkanas, G.; Wilcox Jr., C. F. *J. Am. Chem. Soc.* **1972**, *94*, 2286.
- [25] Poulter, C. D.; King, C-H. R. *J. Am. Chem. Soc.* **1982**, *104*, 1420.
